# Supplementary material for: A database-driven approach identifies additional diterpene synthase activities in the mint family (Lamiaceae)
Source: PubMed Central journal article supplement (PMC6349103; doi:10.1074/jbc.ra118.006025), 2018-11-29
Supplement: supp_RA118.006025_141011_1_supp_233936_ph45w2.pdf [file supp_RA118.006025_141011_1_supp_233936_ph45w2.pdf]

**Sean R. Johnson, Wajid Waheed Bhat, Jacob Bibik, Aiko Turmo, Britta Hamberger, Evolutionary Mint Genomics Consortium, Björn Hamberger**

Table S1. Sources of plants used in this study.

Table S2. List of Primers used in this study.

Table S3. Index of class I diTPS functional assays by *N. benthamiana* transient expression.

Table S4. Index of class II diTPS functional assays by *N. benthamiana* transient expression.

Table S5. Index of *in-vitro* assays.

Figure S1. An example of skeleton extraction.

Figure S2. Pathway diagram of newly characterized enzyme activities

Figure S3. Class I diTPS *N. benthamiana* assays with (+)-CPP.

Figure S4. Class I diTPS *N. benthamiana* assays with (+)-8-LPP.

Figure S5. Class I diTPS *N. benthamiana* assays with PgPP.

Figure S6. Class I diTPS *N. benthamiana* assays with *ent*-CPP.

Figure S7. (+)-CPP synthase *N. benthamiana* assays.

Figure S8. Other class II diTPS *N. benthamiana* assays.

Figure S9. Comparison of *in-vitro* and *in-vivo* activities for selected combinations.

Figure S10. NMR of trans-abienol [**11**]

Figure S11. NMR of labda-7,13E-dien-15-ol [**21a**]

Figure S12. NMR of labda-7,13(16),14-triene [**22**]

Figure S13. NMR of labda-7,12E,14-triene [**24**]

Figure S14. NMR of (10R)-labda-8,13E-diene-15-ol [**25a**]

Figure S15. NMR of (10R)-labda-8,14-dien-13-ol [**26**]

Figure S16. NMR of trans-biformene [**34**]

Figure S17. NMR of neo-cleroda-4(18),14-dien-13-ol [**37**]

Figure S18. NMR of neo-cleroda-4(18),13E-diene-15-ol [**38a**]

Figure S19. NOESY of (+)-cis-abienol

Figure S20. Phylogenetic tree of all known and candidate diTPSs from Lamiaceae

Figure S21. Activity-determining regions in an alignment of previously known, newly characterized, and candidate TPS-c enzymes from Lamiaceae

Figure S22. An activity-determining region in an alignment of previously known, newly characterized, and candidate TPS-e enzymes from Lamiaceae

| <b>Taxon</b>                                  | <b>Subfamily</b> | <b>Source</b>                                                                                                                       |
|-----------------------------------------------|------------------|-------------------------------------------------------------------------------------------------------------------------------------|
| <i>Ajuga reptans</i> L.                       | Ajugoideae       | Horizon Herbs, Williams, Oregon, USA                                                                                                |
| <i>Hyptis suaveolens</i> (L.)<br>Poit.        | Nepetoideae      | Native seeds, Tucson, Arizona, USA                                                                                                  |
| <i>Leonotis leonurus</i> (L.)<br>R.Br.        | Lamioideae       | Logee's Greenhouses, Danielson, Connecticut, USA                                                                                    |
| <i>Mentha spicata</i> L.                      | Nepetoideae      | Richters Herbs, Goodwood, Ontario, Canada                                                                                           |
| <i>Nepeta mussinii</i><br>Spreng. ex Henckel. | Nepetoideae      | Outside Pride, Independence, Oregon, USA                                                                                            |
| <i>Origanum majorana</i><br>L.                | Nepetoideae      | Richters Herbs, Goodwood, Ontario, Canada                                                                                           |
| <i>Perovskia<br/>atriplicifolia</i> Benth.    | Nepetoideae      | Department of Horticulture, Michigan State University ( <a href="https://www.canr.msu.edu/hrt/">https://www.canr.msu.edu/hrt/</a> ) |
| <i>Plectranthus barbatus</i>                  | Nepetoideae      | Companion Plants, Athens, Ohio, USA                                                                                                 |
| <i>Pogostemon cablin</i><br>(Blanco) Benth.   | Lamioideae       | Richters Herbs, Goodwood, Ontario, Canada                                                                                           |
| <i>Prunella vulgaris</i> L.                   | Nepetoideae      | WJ Beal Botanical Garden, Michigan State University                                                                                 |
| <i>Salvia officinalis</i> L.                  | Nepetoideae      | Department of Horticulture, Michigan State University ( <a href="https://www.canr.msu.edu/hrt/">https://www.canr.msu.edu/hrt/</a> ) |

**Table S1.** Sources of plants used in this study.

| <b>Name</b>                                                                                         | <b>Sequence</b>                | <b>Gene of interest</b> |
|-----------------------------------------------------------------------------------------------------|--------------------------------|-------------------------|
| <b><i>Amplification of full length genes from cDNA synthesized from plant tissues total RNA</i></b> |                                |                         |
| <i>ZmAN2-F</i>                                                                                      | ATGGTTCTTTCATCGTCTTGCACA       | <i>ZmAN2</i>            |
| <i>ZmAN2-R</i>                                                                                      | TTATTTTGC GCGCGGAAACAGGTTCA    |                         |
| <i>CfTPS2-F</i>                                                                                     | AGATTGAGGATTCCATTGAGTACGTGAAGG | <i>CfTPS2</i>           |
| <i>CfTPS2-R</i>                                                                                     | GAAGTTTAATATCCTTCATTCTTTATTACA |                         |
| <i>CfTPS3-F</i>                                                                                     | AGCTCCATTCAACTAGAGTCATGTCGT    | <i>CfTPS3</i>           |
| <i>CfTPS3-R</i>                                                                                     | TTCATCTGGCTTAACTAGTTGCTGACAC   |                         |
| <i>CfTPS16-F</i>                                                                                    | TTAAAGTACTCTCTCAAAGAGTACTTTGG  | <i>CfTPS16</i>          |
| <i>CfTPS16-R</i>                                                                                    | GCGACCAACCATCATACTGACT         |                         |
| <i>LITPS1-F</i>                                                                                     | AATGGCCTCCACTGCATCCACTCTA      | <i>LITPS1</i>           |
| <i>LITPS1-R</i>                                                                                     | CCATACTCATTCAACTGGTTCGAACA     |                         |
| <i>LITPS4-F</i>                                                                                     | AGCCTGTGTACTCGAAATGTC          | <i>LITPS4</i>           |
| <i>LITPS4-R</i>                                                                                     | CAAGAGGATGATTCATGTACCAAC       |                         |

|                                                                                                          |                                                                                        |                                                                   |
|----------------------------------------------------------------------------------------------------------|----------------------------------------------------------------------------------------|-------------------------------------------------------------------|
| <i>SoTPS1-F</i>                                                                                          | TCTCTTTCAAGAATATCCCCTCTC                                                               | <i>SoTPS1</i>                                                     |
| <i>SoTPS1-R</i>                                                                                          | GGCATTCAATGATTTTGAGTCG                                                                 |                                                                   |
| <i>ArTPS1-F</i>                                                                                          | AAATGGCCTCTTTGTCCACTCTC                                                                | <i>ArTPS1</i>                                                     |
| <i>ArTPS1-R</i>                                                                                          | TTACGCAACTGGTTCGAAAAGCA                                                                |                                                                   |
| <i>ArTPS2-F</i>                                                                                          | TAATGTCATTTGCTTCCCAAGCCA                                                               | <i>ArTPS2</i>                                                     |
| <i>ArTPS2-R</i>                                                                                          | GGCCTAGACTACCTTCTCAAACAA                                                               |                                                                   |
| <i>ArTPS3-F</i>                                                                                          | AATGTCACTCTCGTTCACCATCAA                                                               | <i>ArTPS3</i>                                                     |
| <i>ArTPS3-R</i>                                                                                          | ACTTCAAGAGGATGAAGTGTTTAGG                                                              |                                                                   |
| <i>PaTPS1-F</i>                                                                                          | CTCCAAAACCTCGGGCCGGTAAAT                                                               | <i>PaTPS1</i>                                                     |
| <i>PaTPS1-R</i>                                                                                          | TACGTATTTCTCACAATCGAGCA                                                                |                                                                   |
| <i>PaTPS3-F</i>                                                                                          | CTAGAAATGTTACTTGCGTTCAAC                                                               | <i>PaTPS3</i>                                                     |
| <i>PaTPS3-R</i>                                                                                          | GGGTAAGAGTTGAATTTAGATGTCT                                                              |                                                                   |
| <i>NmTPS1-F</i>                                                                                          | ATGACTTCAATATCCTCTCTAAATTTGAGC                                                         | <i>NmTPS1</i>                                                     |
| <i>NmTPS1-R</i>                                                                                          | GAATATAGTAATCAGACGACCGGTCCA                                                            |                                                                   |
| <i>NmTPS2-F</i>                                                                                          | GCCATATCATGTCTCTTCCGCTCT                                                               | <i>NmTPS2</i>                                                     |
| <i>NmTPS2-R</i>                                                                                          | TTATTCATGCACCTTAAAATCCTTGAGAG                                                          |                                                                   |
| <i>OmTPS1-F</i>                                                                                          | ATGACCGATGTATCCTCTCTTCGT                                                               | <i>OmTPS1</i>                                                     |
| <i>OmTPS1-R</i>                                                                                          | AAACACTCACATAACCGGCCCAA                                                                |                                                                   |
| <i>OmTPS3-F</i>                                                                                          | GTCCTTGCTTTCGGAATACT                                                                   | <i>OmTPS3</i>                                                     |
| <i>OmTPS3-R</i>                                                                                          | GAAGTGATCTACAAGGATTCATAAA                                                              |                                                                   |
| <i>OmTPS4-F</i>                                                                                          | TCATTGATTTGCCCTGCATCCAC                                                                | <i>OmTPS4</i>                                                     |
| <i>OmTPS4-R</i>                                                                                          | CAAAGCTAGTGCTGCTTCTGATT                                                                |                                                                   |
| <i>OmTPS5-F</i>                                                                                          | ATGGTATCTGCATGTCTAAAACCTCAA                                                            | <i>OmTPS5</i>                                                     |
| <i>OmTPS5-R</i>                                                                                          | CTTTCTCTCTTGTGCATCTTAGT                                                                |                                                                   |
| <i>MsTPS1-F</i>                                                                                          | ACGTTTCATCTTCAATGAGTTCCA                                                               | <i>MsTPS1</i>                                                     |
| <i>MsTPS1-R</i>                                                                                          | TACGTGTATGTCGATCTGTTCCAAT                                                              |                                                                   |
| <i>PcTPS1-F</i>                                                                                          | CATGTCATTTGCTTCTCAATCAC                                                                | <i>PcTPS1</i>                                                     |
| <i>PcTPS1-R</i>                                                                                          | CCCATTATCTAAAAGTCTACATCACC                                                             |                                                                   |
| <i>HsTPS1-F</i>                                                                                          | TCCTCATAAAGCAATGGCGTATA                                                                | <i>HsTPS1</i>                                                     |
| <i>HsTPS1-R</i>                                                                                          | CTAAGATTCAGACAATGGGCTCA                                                                |                                                                   |
| <i>EpTPS8-F</i>                                                                                          | GCAGACGCCAATCTTTCTTGGT                                                                 | <i>EpTPS8</i>                                                     |
| <i>EpTPS8-R</i>                                                                                          | TTATGAAGTTAAAAGGAGTGGTTCGTTGAC                                                         |                                                                   |
| <i>PVTPS1-F</i>                                                                                          | GGAACGAGAAATGTCACTCAC                                                                  | <i>PVTPS1</i>                                                     |
| <i>PVTPS1-R</i>                                                                                          | TTCTAGTTTCTCACAGAAGTCAA                                                                |                                                                   |
| <i>LP4-2A Ver.1 sequence</i>                                                                             | TCAAATGCAGCAGACGAAGTTGCTACTCAACTTTTGAATTTTGACTTGCTGAGTTGGCTGGTGATGTTGAGTCAAACCCTGGACCT | Synthesized by Integrated DNA Technologies, Skokie, Illinois, USA |
| <b>Cloning of full length diTPS genes into pEAQ-HT for transient expression in <i>N. benthamiana</i></b> |                                                                                        |                                                                   |

|                                           |                                         |                |
|-------------------------------------------|-----------------------------------------|----------------|
| <i>pEAQ_Infusion</i><br><i>_CfTPS1-F</i>  | TTCTGCCCAAATTCGATGGGGTCTCTATCCACTATGA   | <i>CfTPS1</i>  |
| <i>pEAQ_Infusion</i><br><i>_CfTPS1-R</i>  | AGTTAAAGGCCTCGATCAGGCGACTGGTTCGAAAAGTA  |                |
| <i>pEAQ_Infusion</i><br><i>_SsSCS-F</i>   | TTCTGCCCAAATTCGATGTCGCTCGCCTTCAAC       | <i>SsSS</i>    |
| <i>pEAQ_Infusion</i><br><i>_SsSCS-R</i>   | AGTTAAAGGCCTCGATCAAAAGACAAAGGATTTTCATA  |                |
| <i>pEAQ_Infusion</i><br><i>_ZmAN2-F</i>   | TTCTGCCCAAATTCGATGGTTCTTTCATCGTCTTGAC   | <i>ZmAN2</i>   |
| <i>pEAQ_Infusion</i><br><i>_ZmAN2-R</i>   | AGTTAAAGGCCTCGATTATTTGCGGCGGAAACAGGT    |                |
| <i>pEAQ_Infusion</i><br><i>_CfTPS2-F</i>  | TTCTGCCCAAATTCGATGAAAATGTTGATGATCAAAAGT | <i>CfTPS2</i>  |
| <i>pEAQ_Infusion</i><br><i>_CfTPS2-R</i>  | AGTTAAAGGCCTCGATCAGACCACTGGTTCAAATAGTA  |                |
| <i>pEAQ_Infusion</i><br><i>_CfTPS3-F</i>  | TTCTGCCCAAATTCGATGTCGTCCTCGCCGGCAACCT   | <i>CfTPS3</i>  |
| <i>pEAQ_Infusion</i><br><i>_CfTPS3-R</i>  | AGTTAAAGGCCTCGACTAGTTGCTGACACAACCTCATT  |                |
| <i>pEAQ_Infusion</i><br><i>_CfTPS16-F</i> | TTCTGCCCAAATTCGATGCAGGCTTCTATGTCATCT    | <i>CfTPS16</i> |
| <i>pEAQ_Infusion</i><br><i>_CfTPS16-R</i> | AGTTAAAGGCCTCGATCATACGACTGGTTCAAACATT   |                |
| <i>pEAQ_Infusion</i><br><i>_LITPS1-F</i>  | TTCTGCCCAAATTCGATGGCCTCCACTGCATCC       | <i>LITPS1</i>  |
| <i>pEAQ_Infusion</i><br><i>_LITPS1-R</i>  | AGTTAAAGGCCTCGATCATTCAACTGGTTCGAACAA    |                |
| <i>pEAQ_Infusion</i><br><i>_LITPS2-F</i>  | TTCTGCCCAAATTCGATGATTCCCTAATCCCGAAA     | <i>LITPS2</i>  |
| <i>pEAQ_Infusion</i><br><i>_LITPS2-R</i>  | AGTTAAAGGCCTCGATTACATTGGCAATCCGATGAA    |                |
| <i>pEAQ_Infusion</i><br><i>_LITPS4-F</i>  | TTCTGCCCAAATTCGATGTCGGTGGCGTTCAACCT     | <i>LITPS4</i>  |
| <i>pEAQ_Infusion</i><br><i>_LITPS4-R</i>  | AGTTAAAGGCCTCGATCAAGAGGATGATTCATGTACC   |                |
| <i>pEAQ_Infusion</i><br><i>_SoTPS1-F</i>  | TTCTGCCCAAATTCGATGTCCTCGCCTTCAACG       | <i>SoTPS1</i>  |
| <i>pEAQ_Infusion</i><br><i>_SoTPS1-R</i>  | AGTTAAAGGCCTCGATCATTGCCACTCACATTT       |                |
| <i>pEAQ_Infusion</i><br><i>_ArTPS1-F</i>  | TTCTGCCCAAATTCGATGGCCTCTTTGTCCACTTTCC   | <i>ArTPS1</i>  |
| <i>pEAQ_Infusion</i><br><i>_ArTPS1-R</i>  | AGTTAAAGGCCTCGATCACGCAACTGGTTCGAAAAGA   |                |
| <i>pEAQ_Infusion</i><br><i>_ArTPS2-F</i>  | TTCTGCCCAAATTCGATGTCATTTGCTTCCCAAGCCAC  | <i>ArTPS2</i>  |
| <i>pEAQ_Infusion</i><br><i>_ArTPS2-R</i>  | AGTTAAAGGCCTCGACTAGACTACCTTCTCAAACAATAC |                |
| <i>pEAQ_Infusion</i><br><i>_ArTPS3-F</i>  | TTCTGCCCAAATTCGATGTCACTCTCGTTCACCATCA   | <i>ArTPS3</i>  |
| <i>pEAQ_Infusion</i><br><i>_ArTPS3-R</i>  | AGTTAAAGGCCTCGATCAAGAGGATGAAGTGTTTAG    |                |



|                                                                        |                                                      |               |
|------------------------------------------------------------------------|------------------------------------------------------|---------------|
| <i>pEAQ_Infusion_PaTPS1-F</i>                                          | TTCTGCCCAAATTCGATGACCTCTATGTCCTCTCTAA                | <i>PaTPS1</i> |
| <i>pEAQ_Infusion_PaTPS1-R</i>                                          | AGTTAAAGGCCTCGATCATACGACCGGTCCAAACAGT                |               |
| <i>pEAQ_Infusion_PaTPS3-F</i>                                          | TTCTGCCCAAATTCGATGTTACTTGC GTTCAACATAAGC             | <i>PaTPS3</i> |
| <i>pEAQ_Infusion_PaTPS3-R</i>                                          | AGTTAAAGGCCTCGATTAATTAGGTAGGTAGAGGGGTT               |               |
| <i>pEAQ_Infusion_NmTPS1-F</i>                                          | ATATTCTGCCCAAATTCGATGACTTCAATATCCTCTCTAAATTTGAGCAATG | <i>NmTPS1</i> |
| <i>pEAQ_Infusion_NmTPS1-R</i>                                          | CAGAGTTAAAGGCCTCGATCAGACGACCGGTCCAA                  |               |
| <i>pEAQ_Infusion_NmTPS2-F</i>                                          | TTCTGCCCAAATTCGATGTCTCTTCCGCTCTCCTCT                 | <i>NmTPS2</i> |
| <i>pEAQ_Infusion_NmTPS2-R</i>                                          | GATAAGTTAAAGGCCTCGATTATTCATGCACCTTAAAATCCTTGAGAGC    |               |
| <i>pEAQ_Infusion_OmTPS1-F</i>                                          | TTCTGCCCAAATTCGATGACCGATGTATCCTCTCTTC                | <i>OmTPS1</i> |
| <i>pEAQ_Infusion_OmTPS1-R</i>                                          | AGTTAAAGGCCTCGATCACATAACCGGCCCAAACA                  |               |
| <i>pEAQ_Infusion_OmTPS3-F</i>                                          | TTCTGCCCAAATTCGATGGCGTCGCTCGCGTTCAC                  | <i>OmTPS3</i> |
| <i>pEAQ_Infusion_OmTPS3-R</i>                                          | AGTTAAAGGCCTCGACTACAAGGATTCATAAATTAAGGA              |               |
| <i>pEAQ_Infusion_OmTPS4-F</i>                                          | TTCTGCCCAAATTCGCGAATGTCACTCGCCTTCAGC                 | <i>OmTPS4</i> |
| <i>pEAQ_Infusion_OmTPS4-R</i>                                          | AGTTAAAGGCCTCGAGCTAGGAGCTTAGGGTTTTTCAT               |               |
| <i>pEAQ_Infusion_OmTPS5-F</i>                                          | TTCTGCCCAAATTCGATGGTATCTGCATGTCTAAA                  | <i>OmTPS5</i> |
| <i>pEAQ_Infusion_OmTPS5-R</i>                                          | AGTTAAAGGCCTCGATCATGAAGGAATTGAAGGAA                  |               |
| <i>pEAQ_Infusion_MsTPS1-F</i>                                          | TTCTGCCCAAATTCGATGAGTTCCATTCGAAATTTAAGT              | <i>MsTPS1</i> |
| <i>pEAQ_Infusion_MsTPS1-R</i>                                          | AGTTAAAGGCCTCGATCACTTGAGAGGCTCAAACATCAT              |               |
| <i>pEAQ_Infusion_PcTPS1-F</i>                                          | TTCTGCCCAAATTCGATGTCATTTGCTTCTCAATCAC                | <i>PcTPS1</i> |
| <i>pEAQ_Infusion_PcTPS1-R</i>                                          | AGTTAAAGGCCTCGACTACATCACCTCTCAAACAATAC               |               |
| <i>pEAQ_Infusion_HsTPS1-F</i>                                          | TTCTGCCCAAATTCGATGGCGTATATGATATCTATTTCAAATCTC        | <i>HsTPS1</i> |
| <i>pEAQ_Infusion_HsTPS1-R</i>                                          | AGTTAAAGGCCTCGATCAGACAATGGGCTCAAATAGAAC              |               |
| <i>pEAQ_Infusion_EpTPS8-F</i>                                          | TTCTGCCCAAATTCGATGCAAGTCTCTCTCTCCCTCA                | <i>EpTPS8</i> |
| <i>pEAQ_Infusion_EpTPS8-R</i>                                          | AGTTAAAGGCCTCGATTATGAAGTTAAAAGGAGTGGTT               |               |
| <i>pEAQ_Infusion_PVTPS1-F</i>                                          | TTCTGCCCAAATTCGCGAATGTCACTCACTTTCAACG                | <i>PVTPS1</i> |
| <i>pEAQ_Infusion_PVTPS1-R</i>                                          | AGTTAAAGGCCTCGAGCTAGTTTCTCACAGAAGTCAA                |               |
| <b>Cloning of diTPS genes into pET-28 b (+) for E. coli expression</b> |                                                      |               |

|                           |                                               |               |
|---------------------------|-----------------------------------------------|---------------|
| <i>pET28_CfTPS1</i><br>-F | AGGAGATATAACCATGGCCGAGATTTCGAGTTGCCAC         | <i>CfTPS1</i> |
| <i>pET28_CfTPS1</i><br>-R | GGTGGTGGTGCTCGAAGGCGACTGGTTCGAAAAGTAC         |               |
| <i>pET28_SsSS-F</i>       | AGGAGATATAACCATGGATTTTCATGGCGAAAATGAAAGAGA    | <i>SsSS</i>   |
| <i>pET28_SsSS-R</i>       | GGTGGTGGTGCTCGAAAAGACAAAGGATTTTCATAT          |               |
| <i>pET28_CfTPS2</i><br>-F | AGGAGATATAACCATGCAAATTCGTGGAAAGCAAAGATCAC     | <i>CfTPS2</i> |
| <i>pET28_CfTPS2</i><br>-R | GGTGGTGGTGCTCGAAGACCACTGGTTCAAATAGAACT        |               |
| <i>pET28_CfTPS3</i><br>-F | AGGAGATATAACCATGTCTAAATCATCTGCAGCTGT          | <i>CfTPS3</i> |
| <i>pET28_CfTPS3</i><br>-R | GGTGGTGGTGCTCGAAGTTGCTGACACAACCTCATT          |               |
| <i>pET28_OmTPS</i><br>3-F | AGGAGATATAACCATGACCGTCAAATGCTAC               | <i>OmTPS3</i> |
| <i>pET28_OmTPS</i><br>3-R | GGTGGTGGTGCTCGAACAAGGATTCATAAATTAAG           |               |
| <i>pET28_OmTPS</i><br>5-F | AGGAGATATAACCATGACTGTCAAGTGCAGC               | <i>OmTPS5</i> |
| <i>pET28_OmTPS</i><br>5-R | GGTGGTGGTGCTCGAATGAAGGAATTGAAG                |               |
| <i>pET28_PcTPS</i><br>1-F | AGGAGATATAACCATGTTTATGCCCACTTCCATTAAATGTA     | <i>PcTPS1</i> |
| <i>pET28_PcTPS</i><br>1-R | GGTGGTGGTGCTCGAACATCACCTCTCAAACAATACTTTGG     |               |
| <i>pET28_HsTPS</i><br>1-F | AGGAGATATAACCATGGTAGCAAAAAGTGATCGAGAGCCGAGTTA | <i>HsTPS1</i> |
| <i>pET28_HsTPS</i><br>1-R | GGTGGTGGTGCTCGAAGACAATGGGCTCAAATAGAACTTTAAAT  |               |

**Table S2.** List of synthetic oligonucleotides used in this study.

|               | CfTPS1 [31] |        | CfTPS2 [10] |        | LITPS1 [5]        |        | ZmAN2 [16] |        | HsTPS1 [21] |        | PcTPS1 [25] |        | ArTPS2 [38] |        | OmTPS1 [31] |        |
|---------------|-------------|--------|-------------|--------|-------------------|--------|------------|--------|-------------|--------|-------------|--------|-------------|--------|-------------|--------|
|               | products    | figure | products    | figure | products          | figure | products   | figure | products    | figure | products    | figure | products    | figure | products    | figure |
| <i>ArTPS3</i> | <b>32</b>   | S-3A   | <b>8</b>    | S-4B   | <b>1, 2, 3</b>    | S-5A   | np         | S-6B   | -           |        | -           |        | -           | -      | -           |        |
| <i>LITPS4</i> | <b>27</b>   | S-3A   | <b>8</b>    | S-4A   | <b>1, 2, 3</b>    | S-5B   | np         | S-6A   | -           |        | -           |        | -           |        | -           |        |
| <i>MsTPS1</i> | <b>27</b>   | S-3A   | <b>8</b>    | S-4C   | <b>3</b>          | S-5A   | np         | S-6A   | -           |        | -           |        | np          | S-8A   | -           |        |
| <i>NmTPS2</i> | np          | S-3D   | np          | S-4D   | np                | S-5D   | <b>19</b>  | S-6A   | -           |        | -           |        | np          | S-8A   | -           |        |
| <i>OmTPS3</i> | <b>34</b>   | S-3A   | <b>11</b>   | S-4D,E | <b>1, 2</b>       | S-5A   | np         | S-6A   | <b>24</b>   | S-8B   | -           |        | np          | S-8A   | <b>34</b>   | S-3C   |
| <i>OmTPS4</i> | <b>33</b>   | S-3A   | <b>8</b>    | S-4C   | <b>1, 2, 3, 4</b> | S-5D   | <b>20</b>  | S-6A   | -           |        | -           |        | -           |        | <b>33</b>   | S-3C   |
| <i>OmTPS5</i> | <b>29</b>   | S-3A   | <b>8</b>    | S-4A   | <b>1, 2, 3</b>    | S-5A   | np         | S-6A   | -           |        | -           |        | np          | S-8A   | <b>29</b>   | S-3C   |
| <i>PaTPS3</i> | <b>32</b>   | S-3B   | <b>8</b>    | S-4B   | <b>1, 2, 3</b>    | S-5C   | np         | S-6B   | -           |        | -           |        | -           |        | -           |        |
| <i>PvTPS1</i> | <b>32</b>   | S-3B   | <b>8</b>    | S-4B   | <b>1, 2, 3</b>    | S-5C   | np         | S-6B   | -           |        | -           |        | -           |        | -           |        |
| <i>SoTPS1</i> | <b>32</b>   | S-3B   | <b>8</b>    | S-4B   | <b>1, 2, 3</b>    | S-5D   | np         | S-6B   | -           |        | -           |        | -           |        | -           |        |
| <i>CfTPS3</i> | <b>32</b>   |        | <b>8</b>    |        | <b>1, 2, 3</b>    |        | np         |        | <b>22</b>   | S-8B   | np          | S-8C   | np          |        | <b>32</b>   | S-7D   |
| <i>SsSS</i>   | <b>33</b>   |        | -           |        | <b>4</b>          |        | <b>20</b>  |        | <b>23</b>   | S-8B   | <b>26</b>   | S-8C   | <b>37</b>   | S-8A   | -           |        |

**Table S3.** Index of class I diTPS functional assays by *N. benthamiana* transient expression. Bold umbers refer to compound numbers; “np” indicates that the combination was tested but no product was detected; “-” indicates that the combination was not tested. Blue genes are new to this study.

|         | Product                              | Figure |
|---------|--------------------------------------|--------|
| ArTPS1  | Copalyl-PP [31]                      | S-7A   |
| CfTPS16 | Copalyl-PP [31]                      | S-7B   |
| NmTPS1  | Copalyl-PP [31]                      | S-7C   |
| OmTPS1  | Copalyl-PP [31]                      | S-7D   |
| PaTPS1  | Copalyl-PP [31]                      | S-7A   |
| ArTPS2  | Neo-cleroda-4(18),13E-dienyl-PP [38] | S-8A   |
| HsTPS1  | Labda-7,13E-dienyl-PP [21]           | S-8B   |
| LITPS1  | Peregrinol-PP [7]                    | S-5B   |
| PcTPS1  | Ent-labda-8,13E-dienyl-PP [25]       | S-8C   |

**Table S4.** Index of class II diTPS functional assays by *N. benthamiana* transient expression. Blue genes are new to this study.

| Class II    | Class I | Product              | Figure |
|-------------|---------|----------------------|--------|
| CfTPS1 [31] | OmTPS3  | trans-biformene [34] | S-9C   |
| CfTPS2 [10] | OmTPS3  | trans-abienol [11]   | S-9D   |
| HsTPS1 [21] | OmTPS3  | [24]                 | S-9B   |
| CfTPS1 [31] | OmTPS5  | palustradiene [29]   | S-9E   |
| ArTPS2 [38] | SsSS    | [37]                 | 5A     |
| HsTPS1 [21] | SsSS    | [23]                 | S-9A   |
| PcTPS1 [25] | SsSS    | [26]                 | 5B     |

**Table S5.** Index of *in-vitro* assays. Blue genes are new to this study.

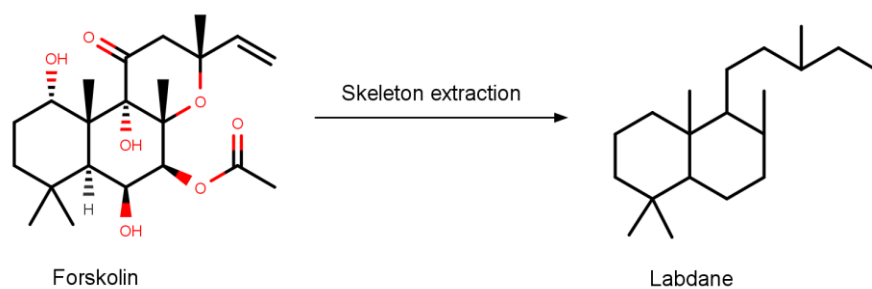

**Figure S1.** An example of skeleton extraction. By deleting all heteroatoms, desaturation, and stereochemistry, the labdane skeleton is extracted from the forskolin structure.

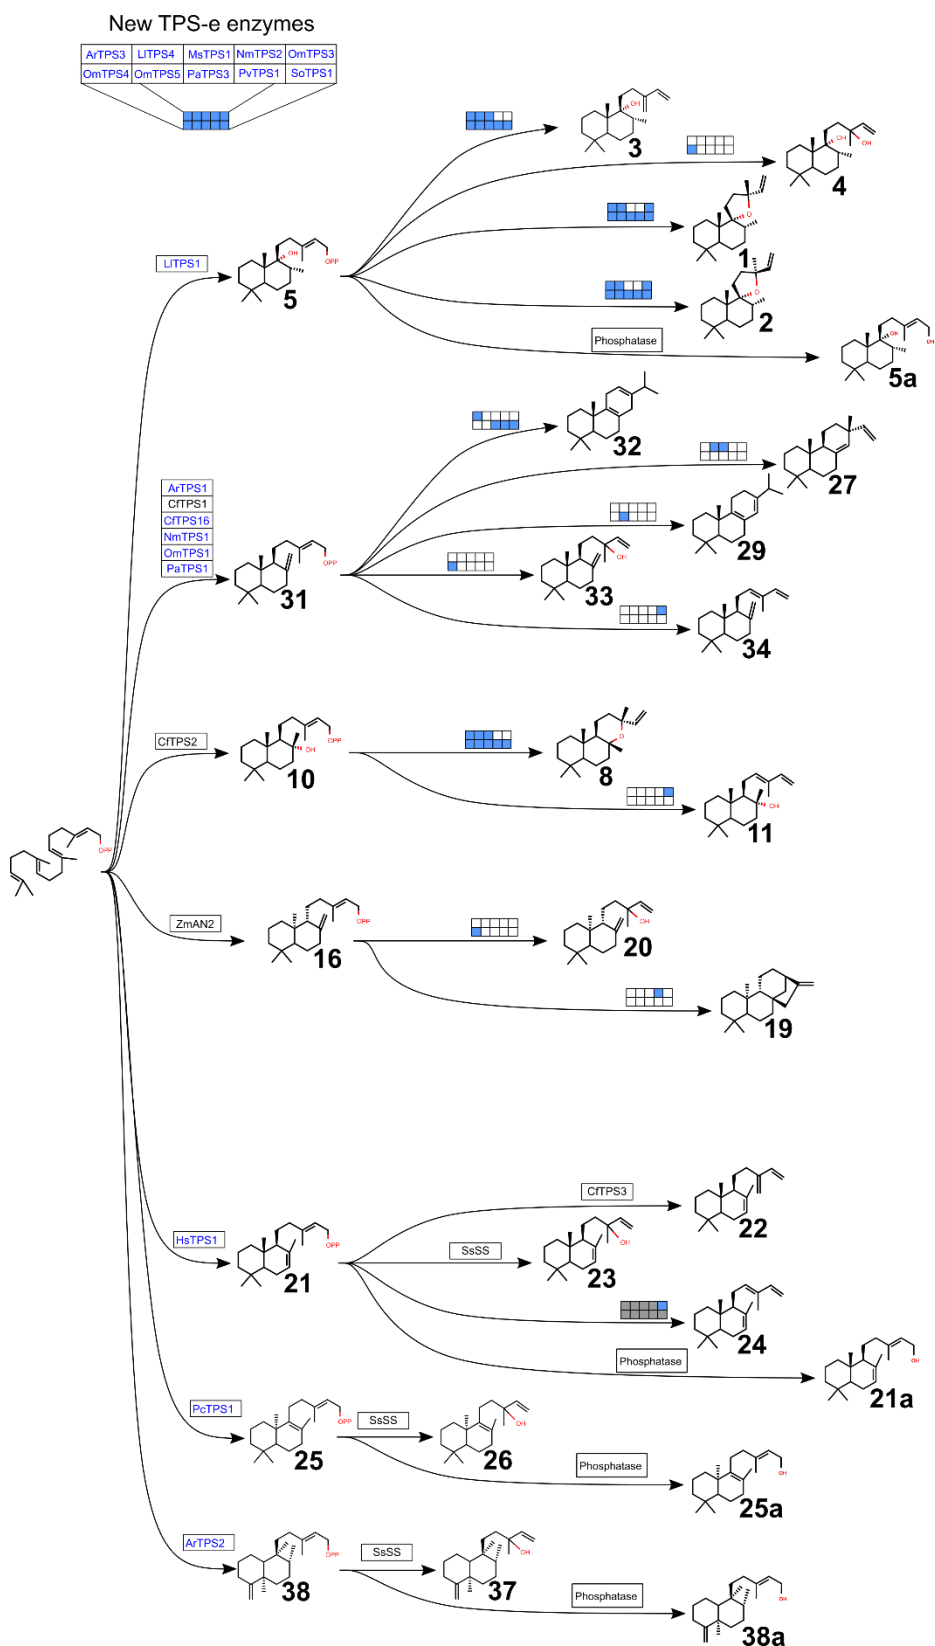

**Figure S2.** Newly characterized enzyme activities. Blue genes are newly characterized. Blue square: TPS-e from that position on the key catalyzes the shown transformation. White square: corresponding TPS-e does not catalyze the shown activity. Grey square: corresponding TPS-e was not tested on the substrate.

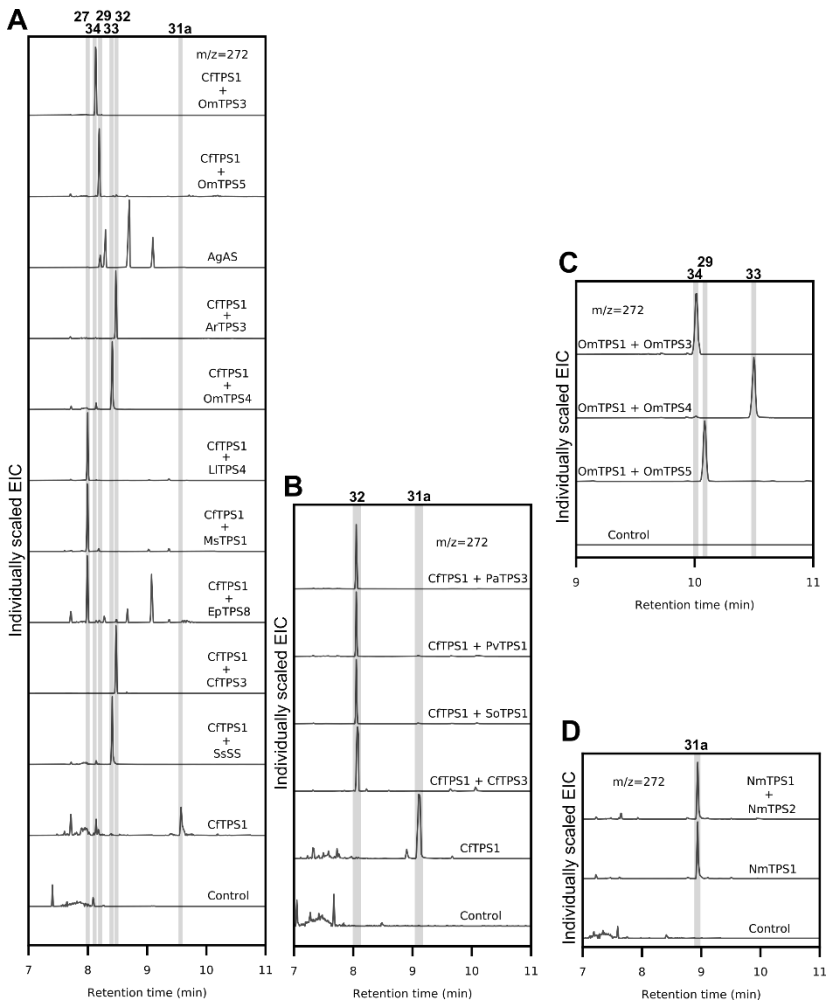

**Figure S3.** GC-MS chromatograms of hexane extracts from *N. benthamiana* transiently expressing (+)-CPP-producing class II diTPSs along with new class I diTPSs, and reference combinations. AgAS, *Abies grandis* abietadiene synthase; EpTPS8, *Euphorbia peplus* TPS8.

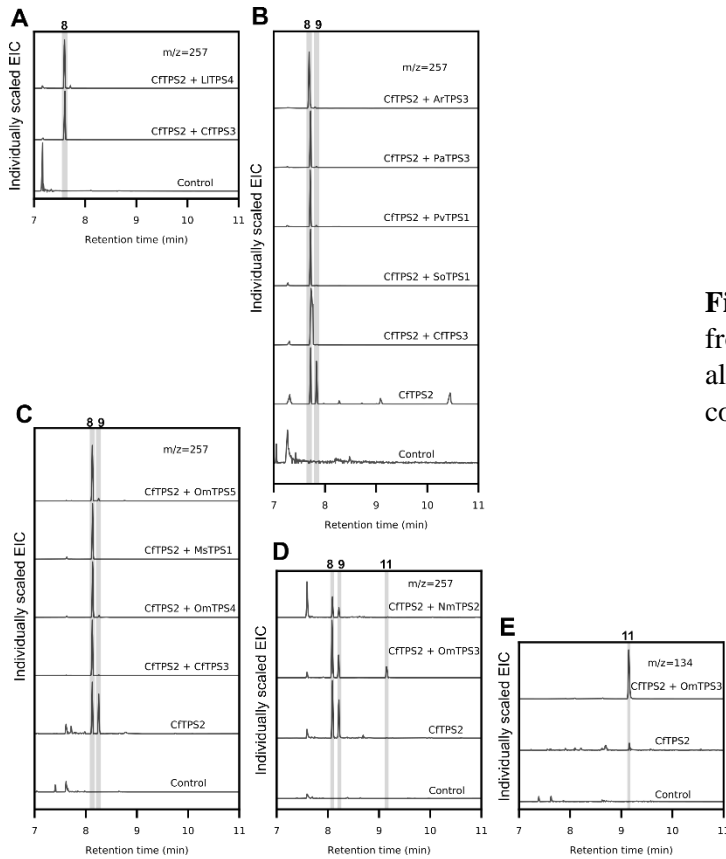

**Figure S4.** GC-MS chromatograms of hexane extracts from *N. benthamiana* transiently expressing CftPS2 along with new class I diTPSs, and reference combinations.

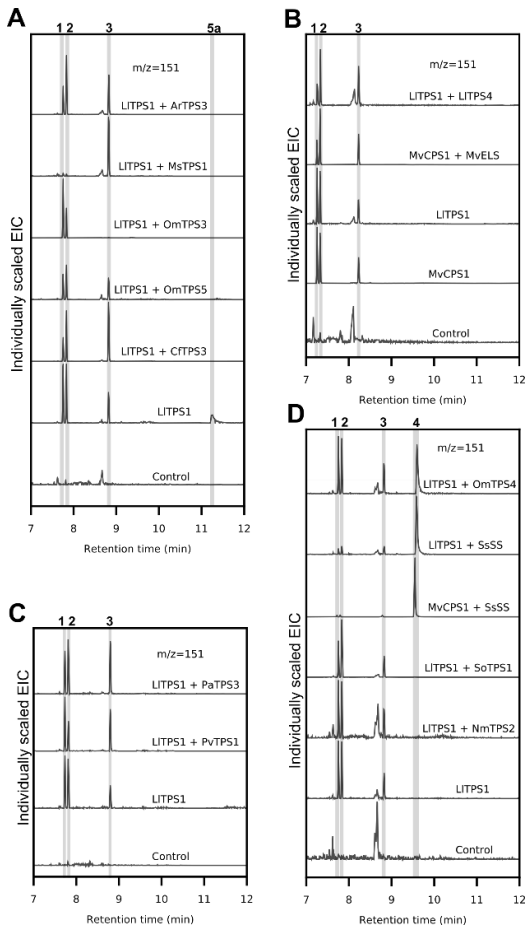

**Figure S5.** GC-MS chromatograms of hexane extracts from *N. benthamiana* transiently expressing LITPS1 along with new class I diTPSs, and reference combinations.

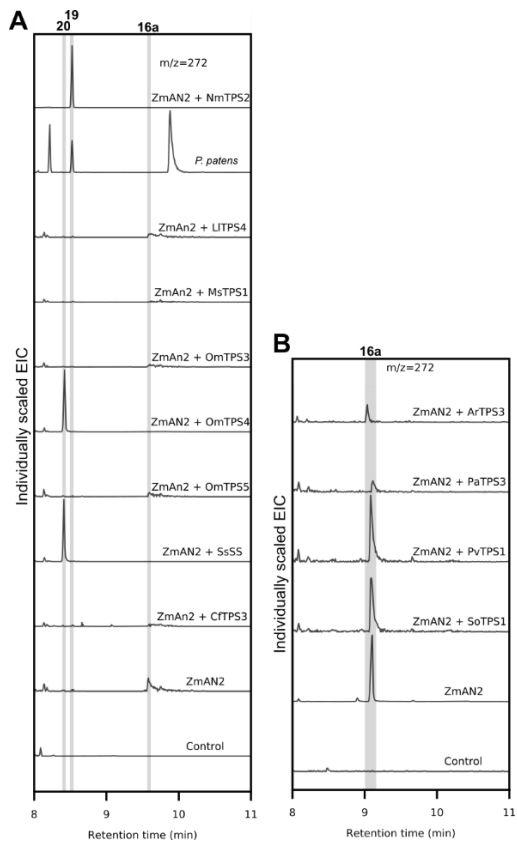

**Figure S6.** GC-MS chromatograms of hexane extracts from *N. benthamiana* transiently expressing ZmAN2 along with new class I diTPSs, and reference combinations.

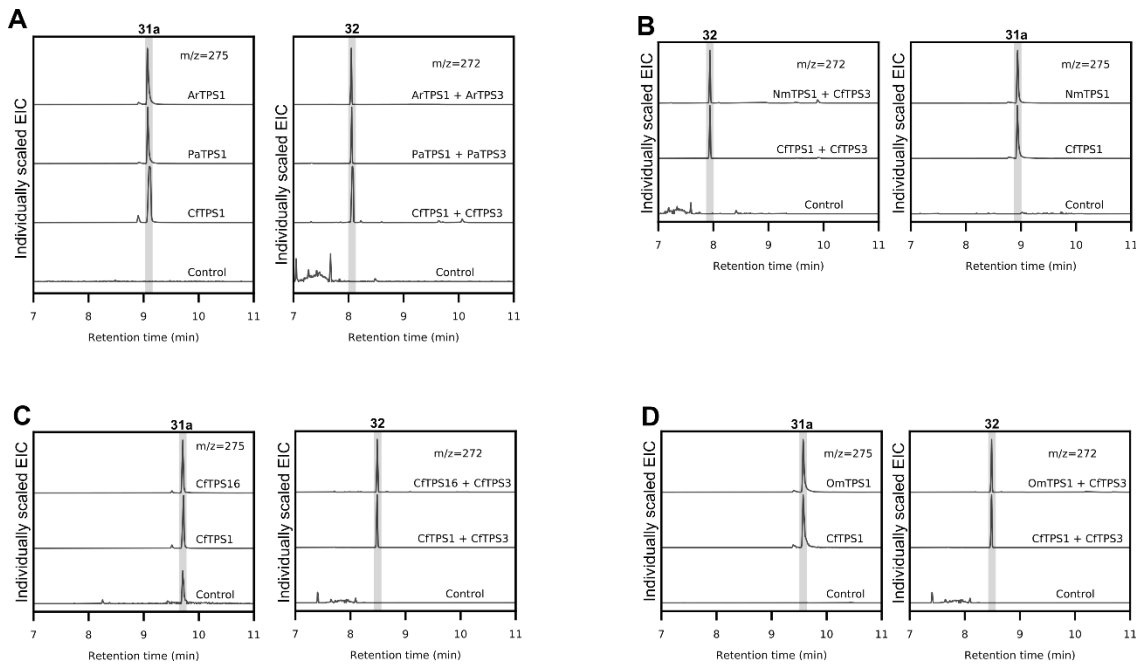

**Figure S7.** GC-MS chromatograms of hexane extracts from *N. benthamiana* transiently expressing new (+)-CPP synthases along with reference combinations.

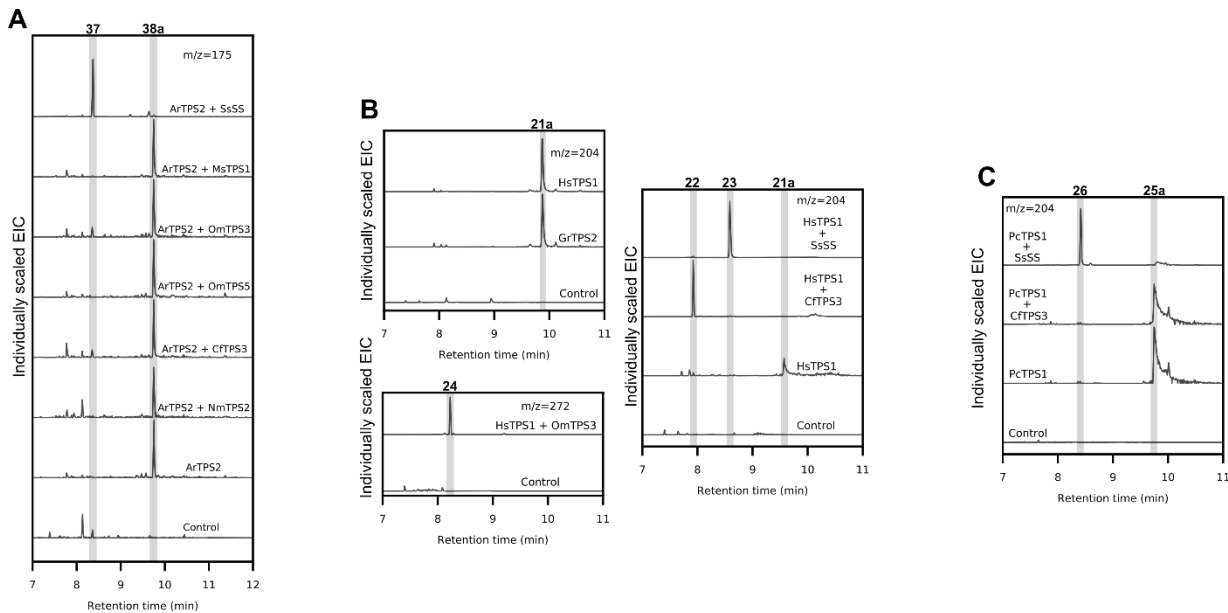

**Figure S8.** GC-MS chromatograms of hexane extracts from *N. benthamiana* transiently expressing new class II diTPSs, reference combinations, and combinations with new class I diTPSs.

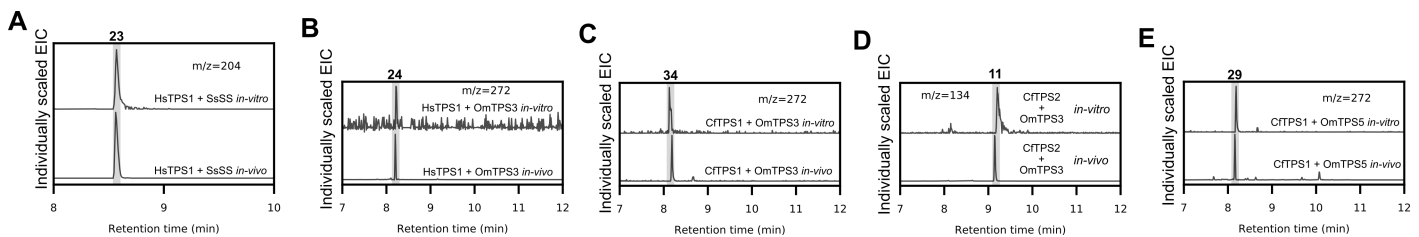

**Figure S9.** Comparison of GC-MS chromatograms of hexane extracts from *in-vitro* assays of purified diTPSs with extracts from *N. benthamiana* transiently expressing diTPS combinations.

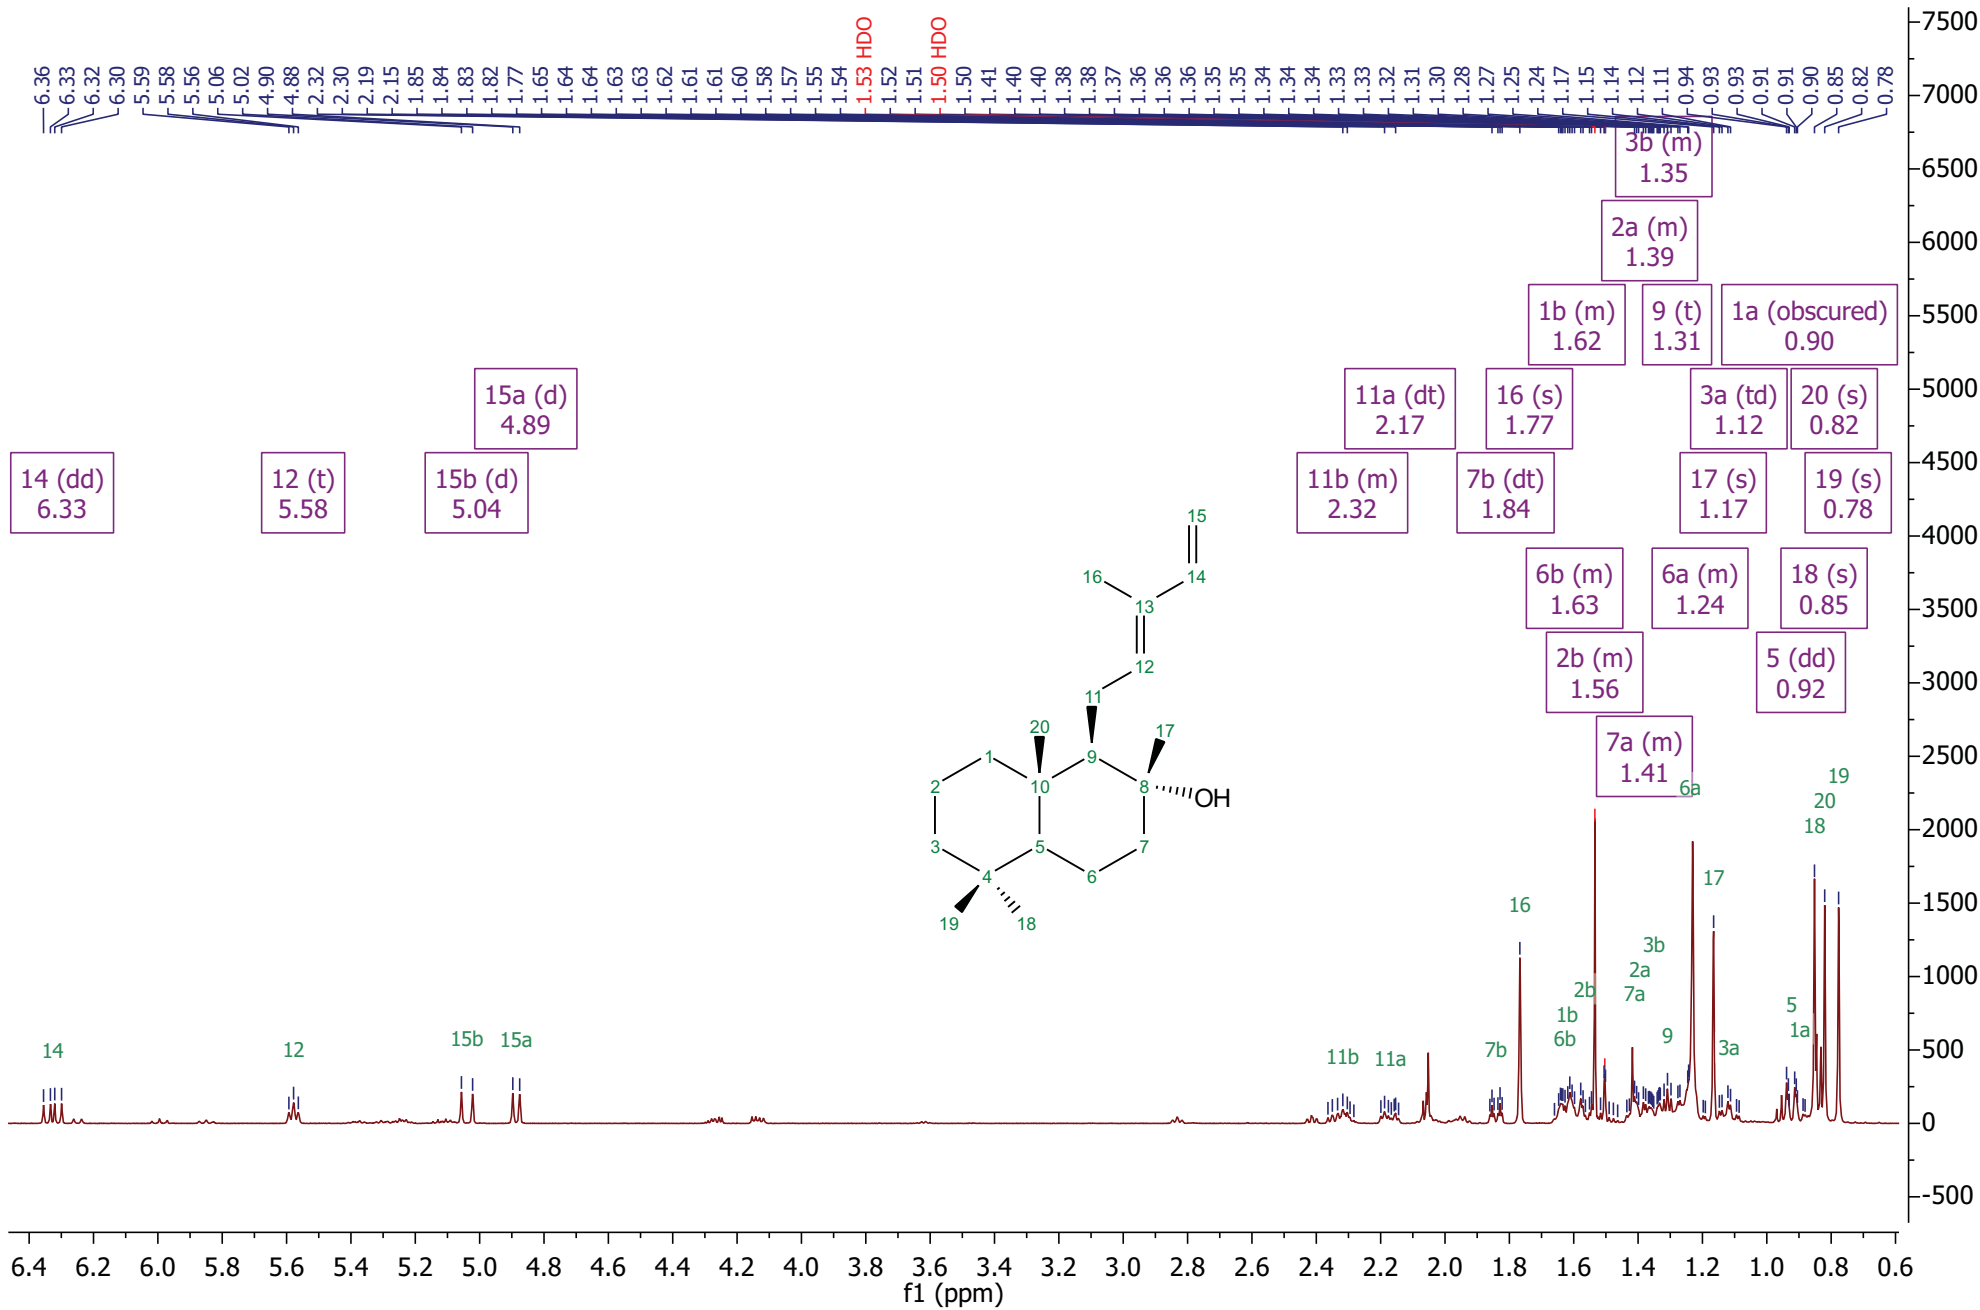

Figure S10-A. <sup>1</sup>H NMR of trans-abienol [11].



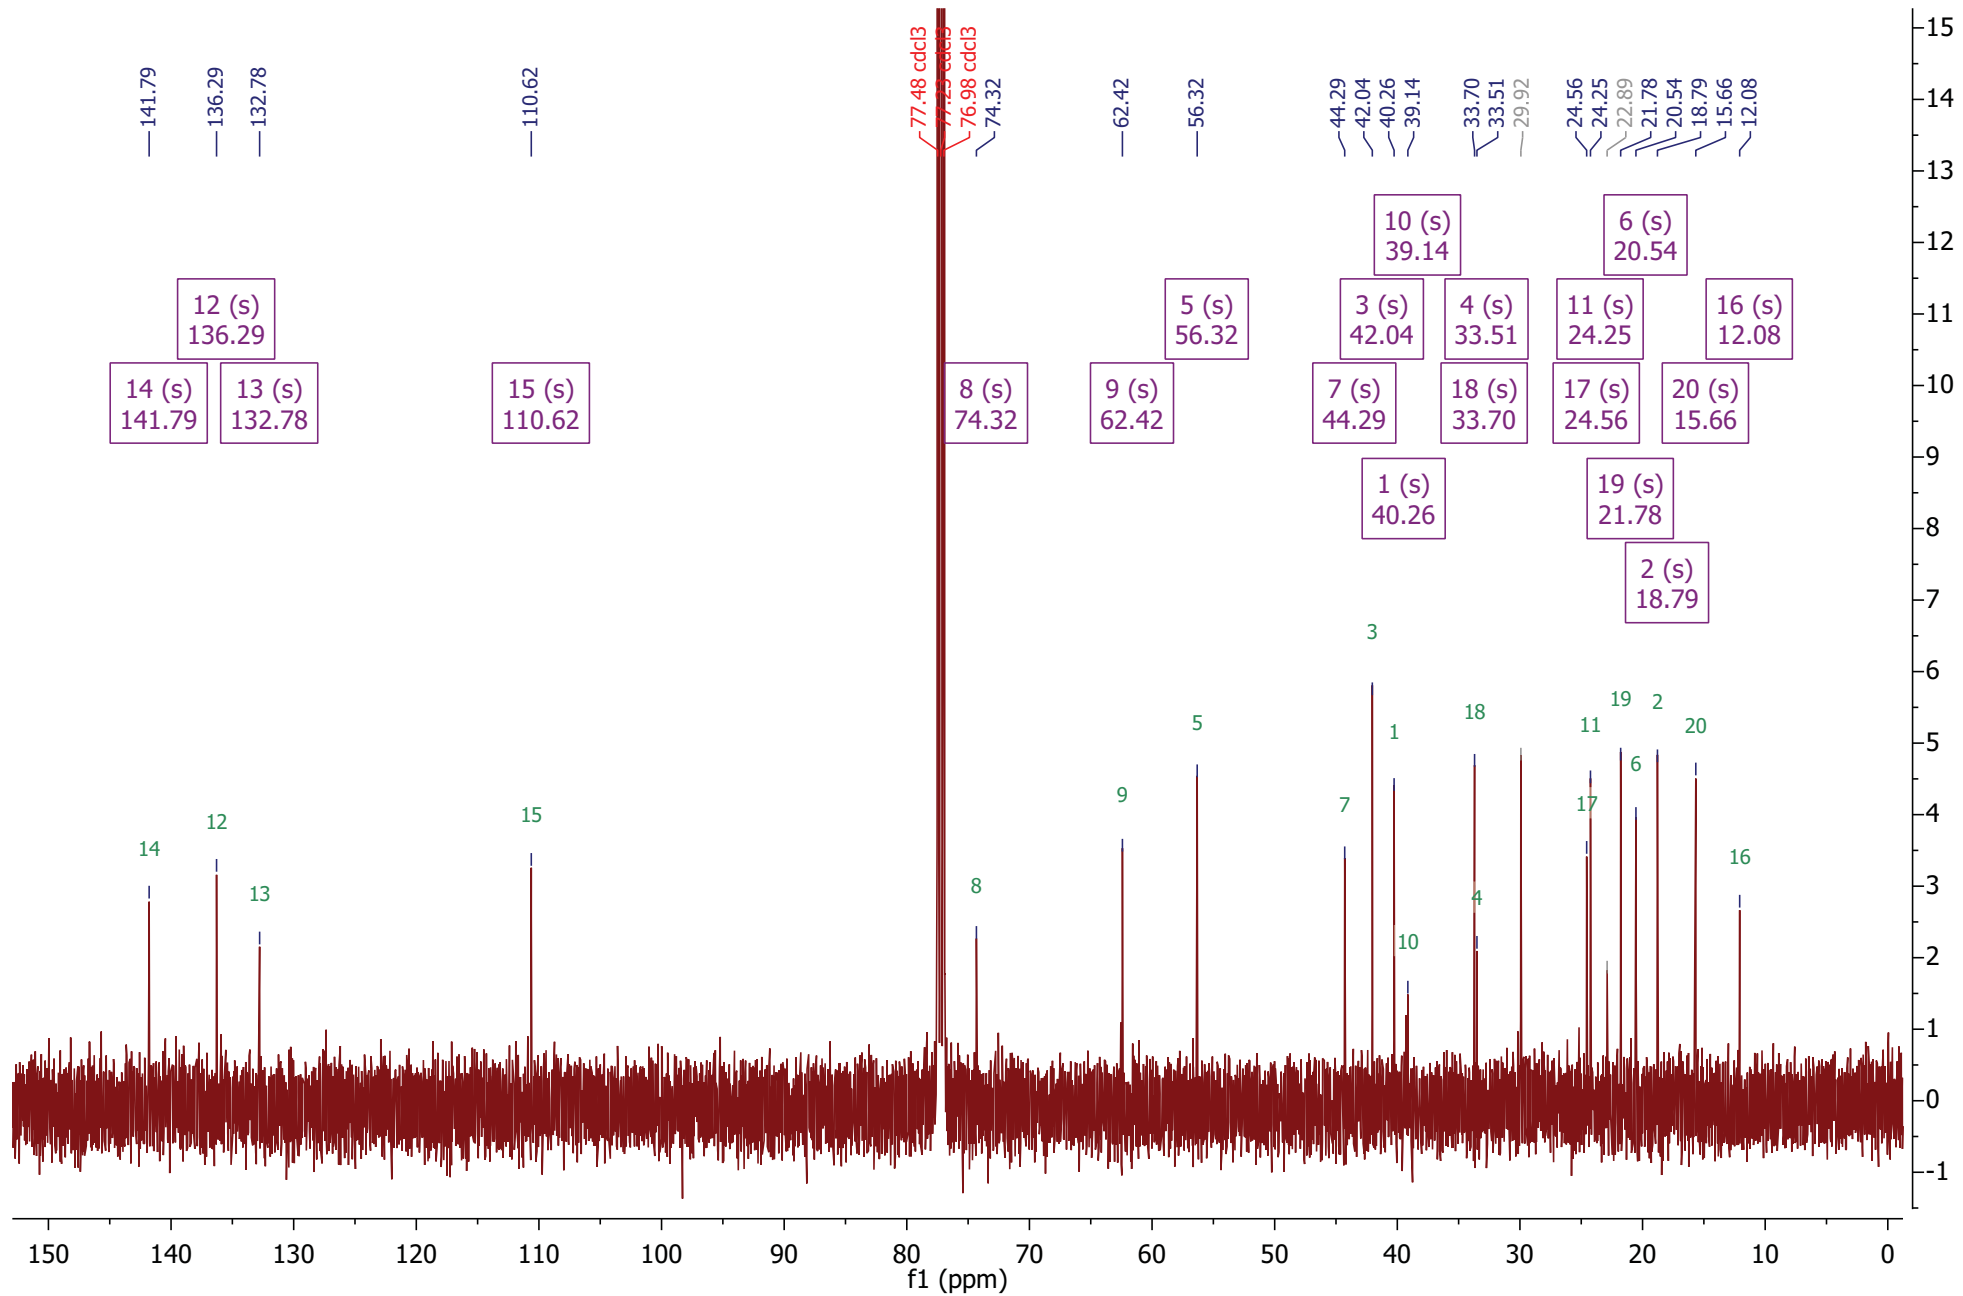

Figure S10-B.  $^{13}\text{C}$  NMR of trans-abienol [11].

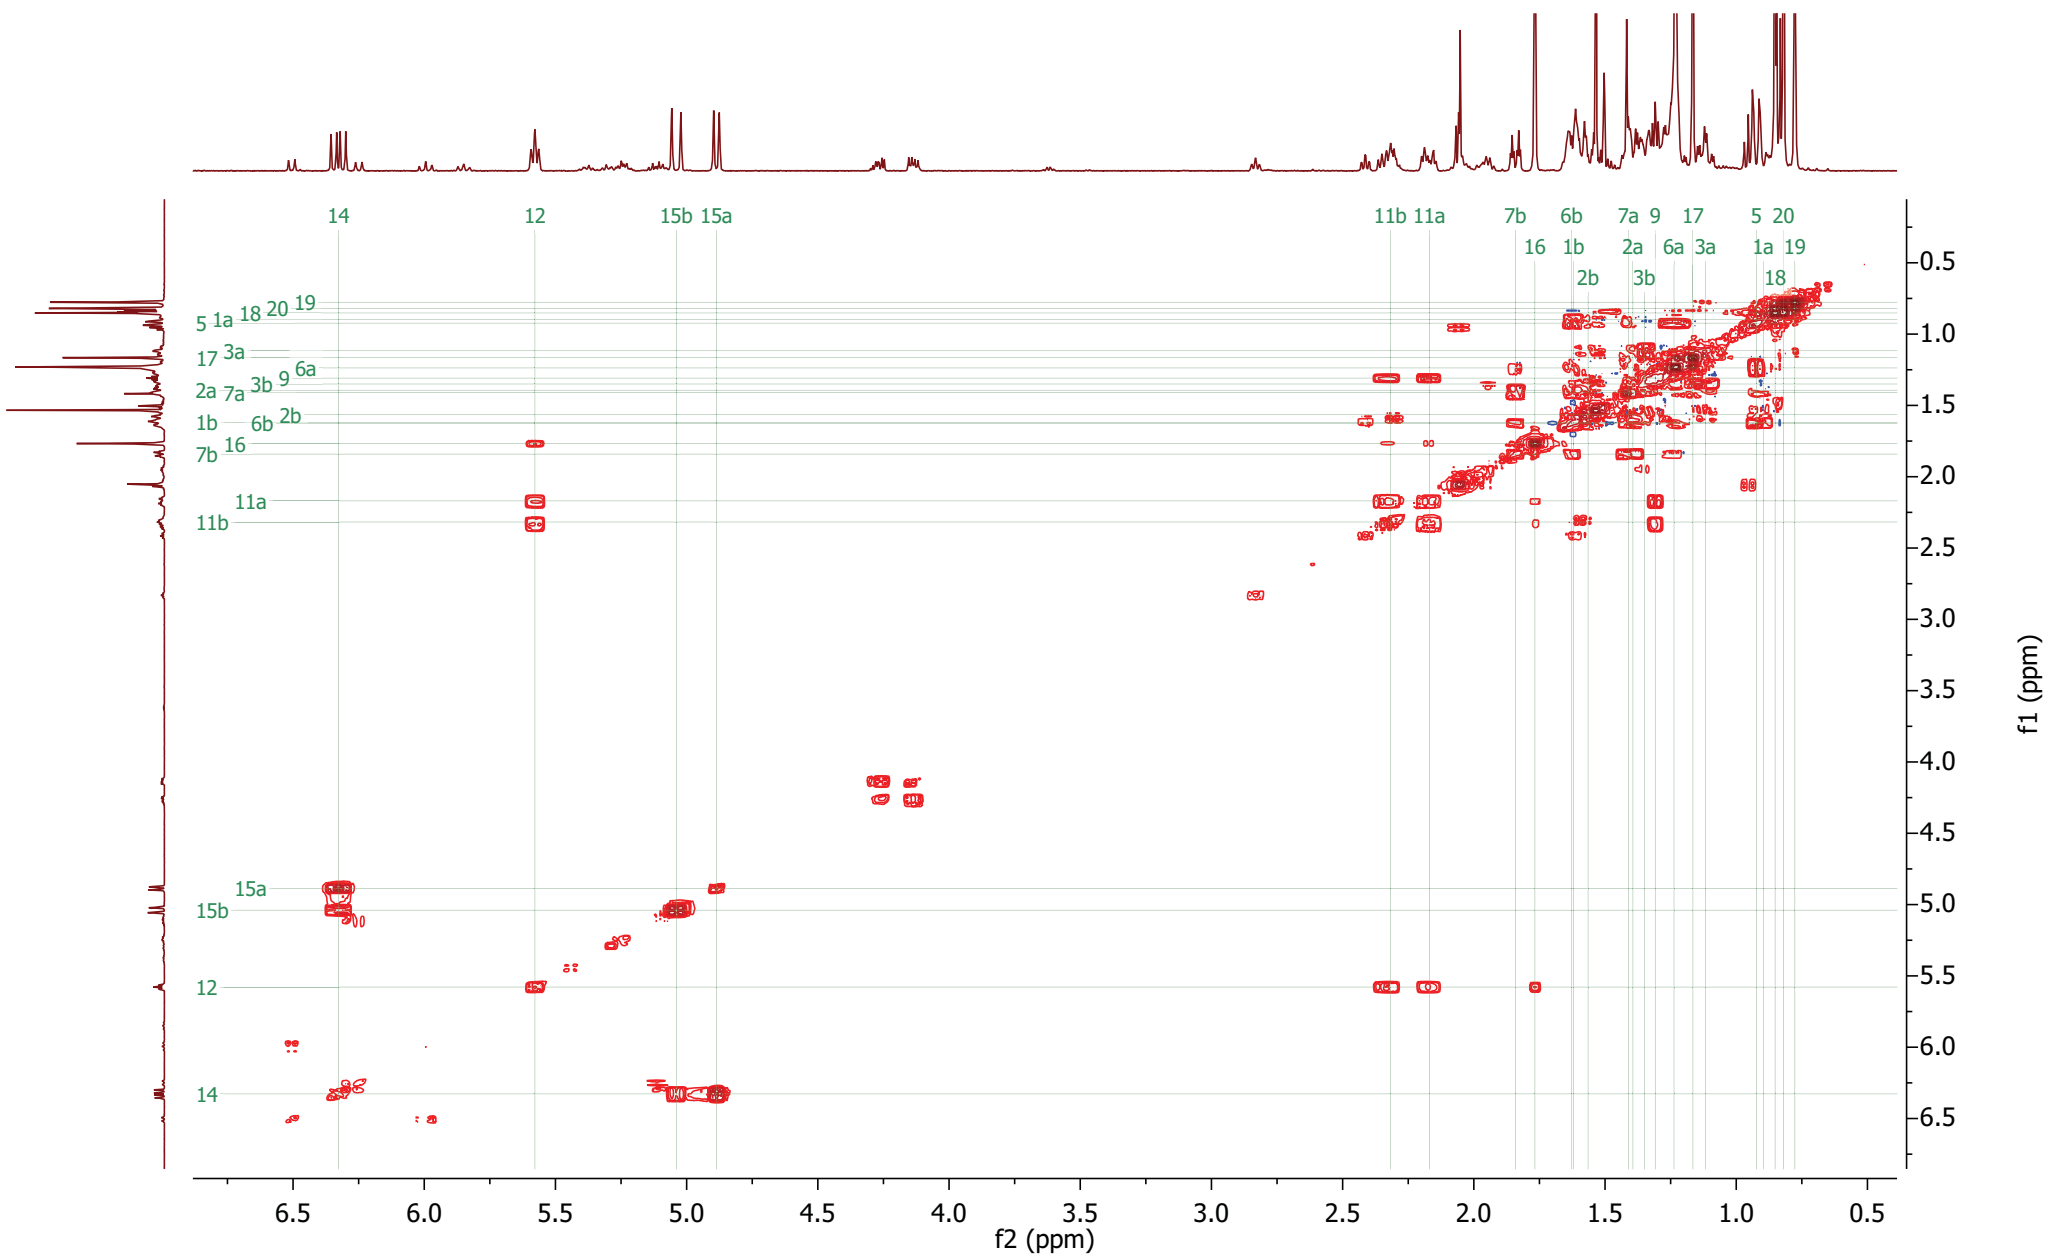

Figure S10-C.  $^1\text{H}$ - $^1\text{H}$  COSY of trans-abienol [11].

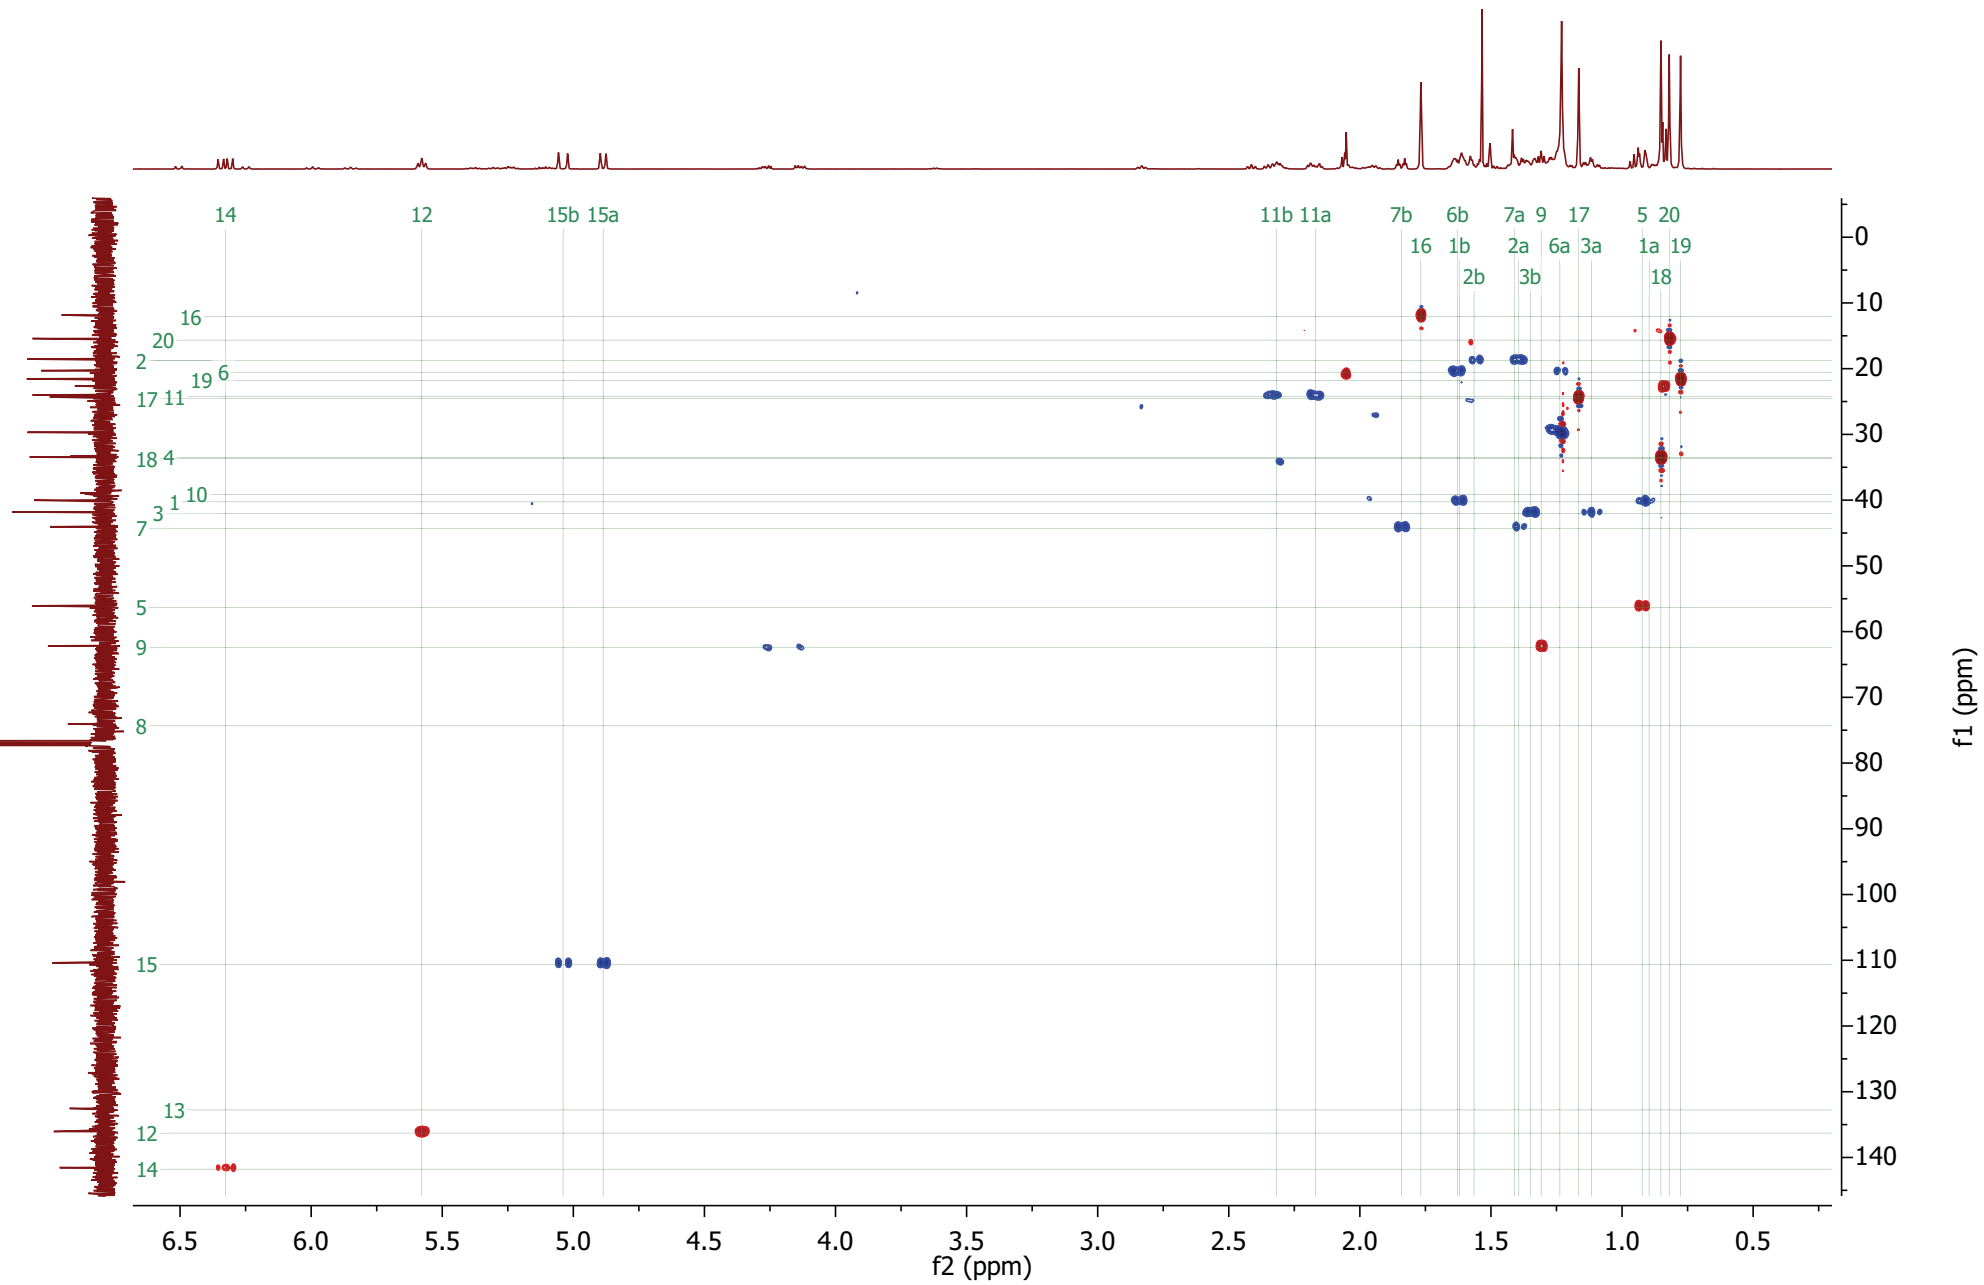

Figure S10-D.  $^1\text{H}$ - $^{13}\text{C}$  HSQC of trans-abienol [11].

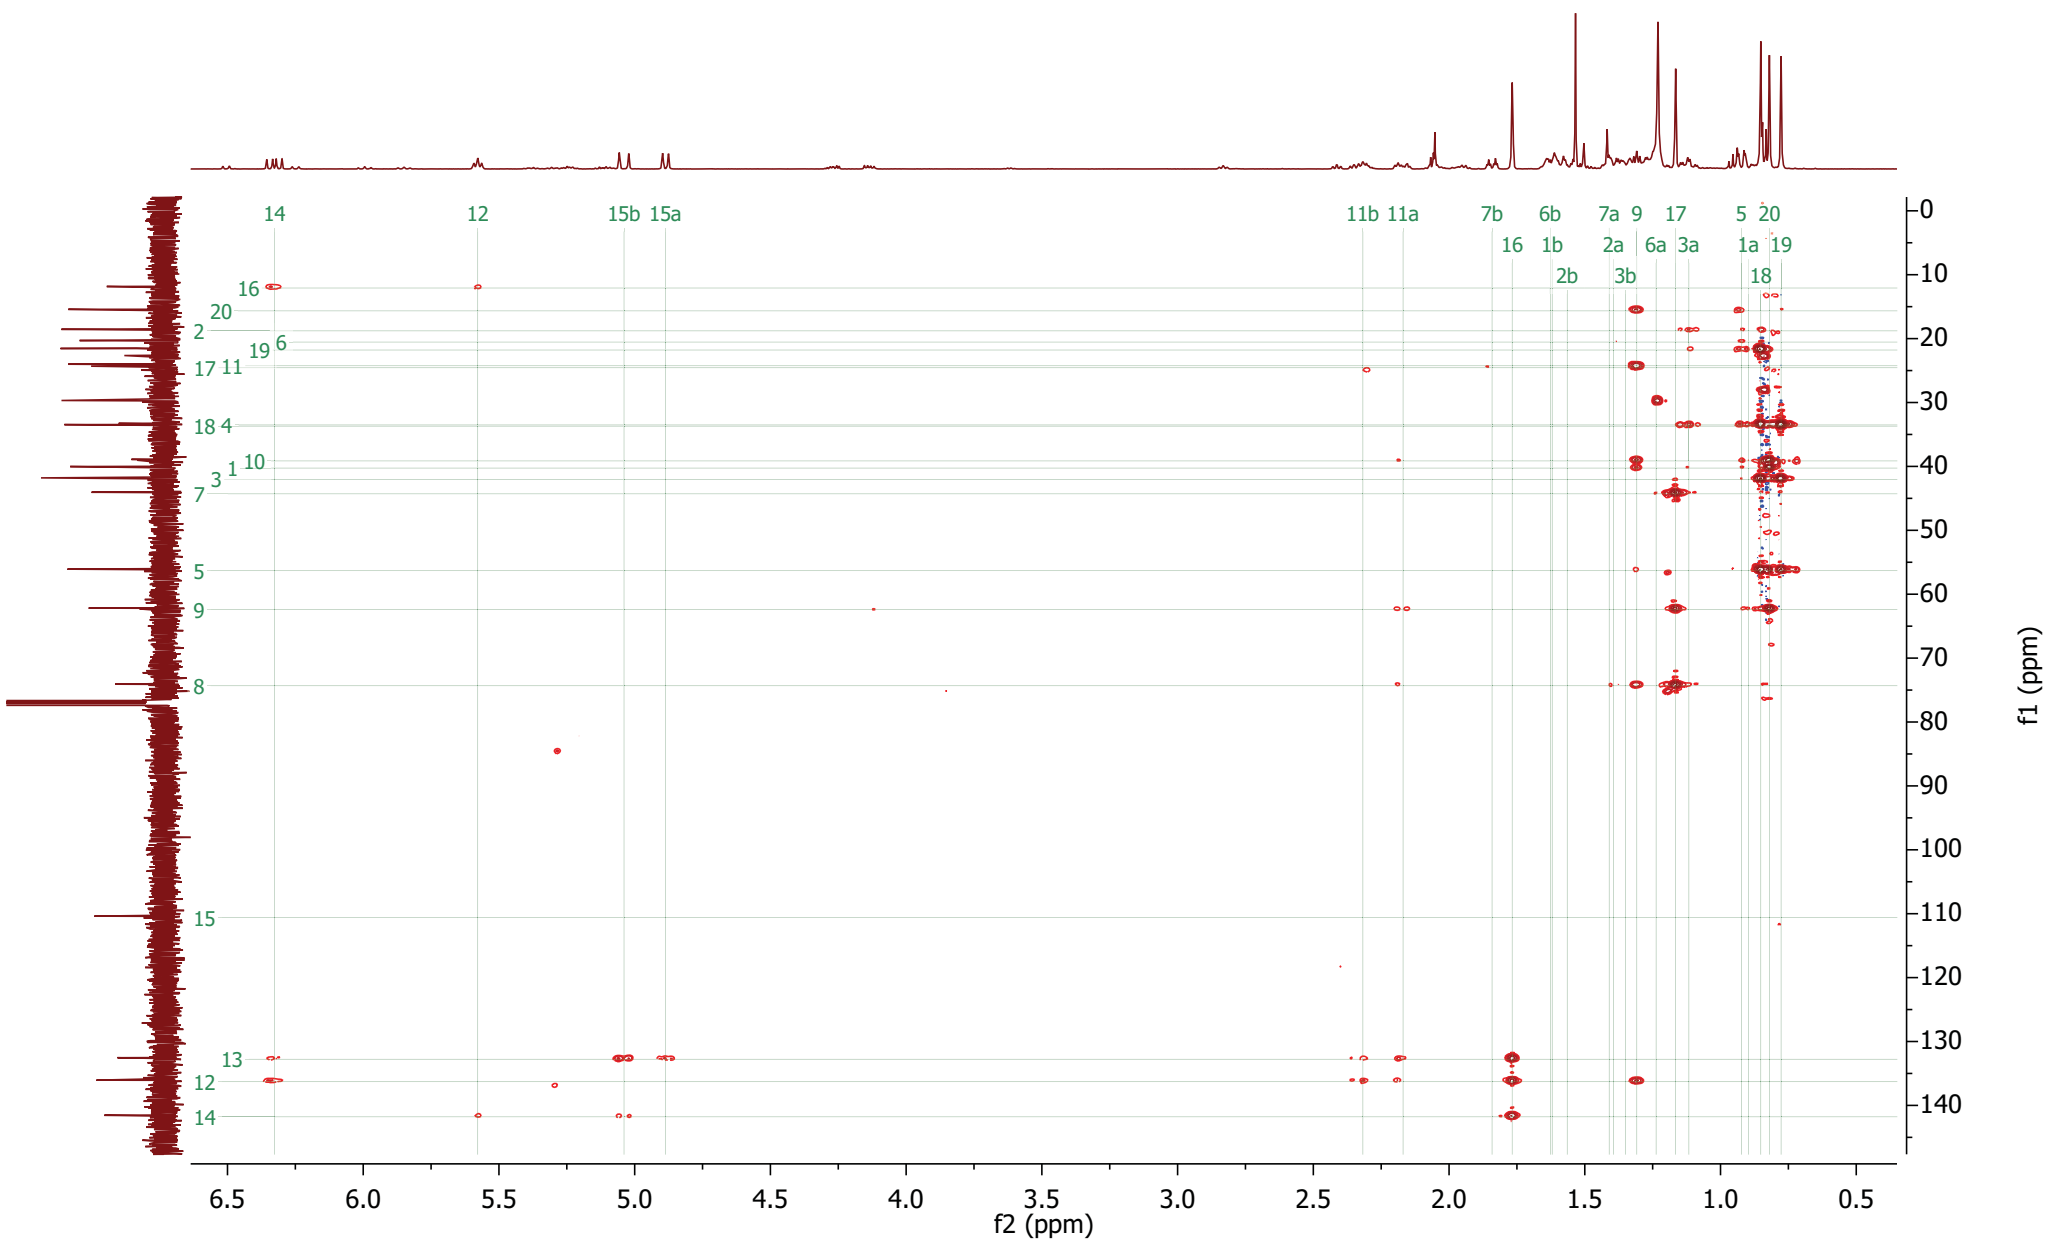

Figure S10-E.  $^1\text{H}$ - $^{13}\text{C}$  HMBC of trans-abienol [11].

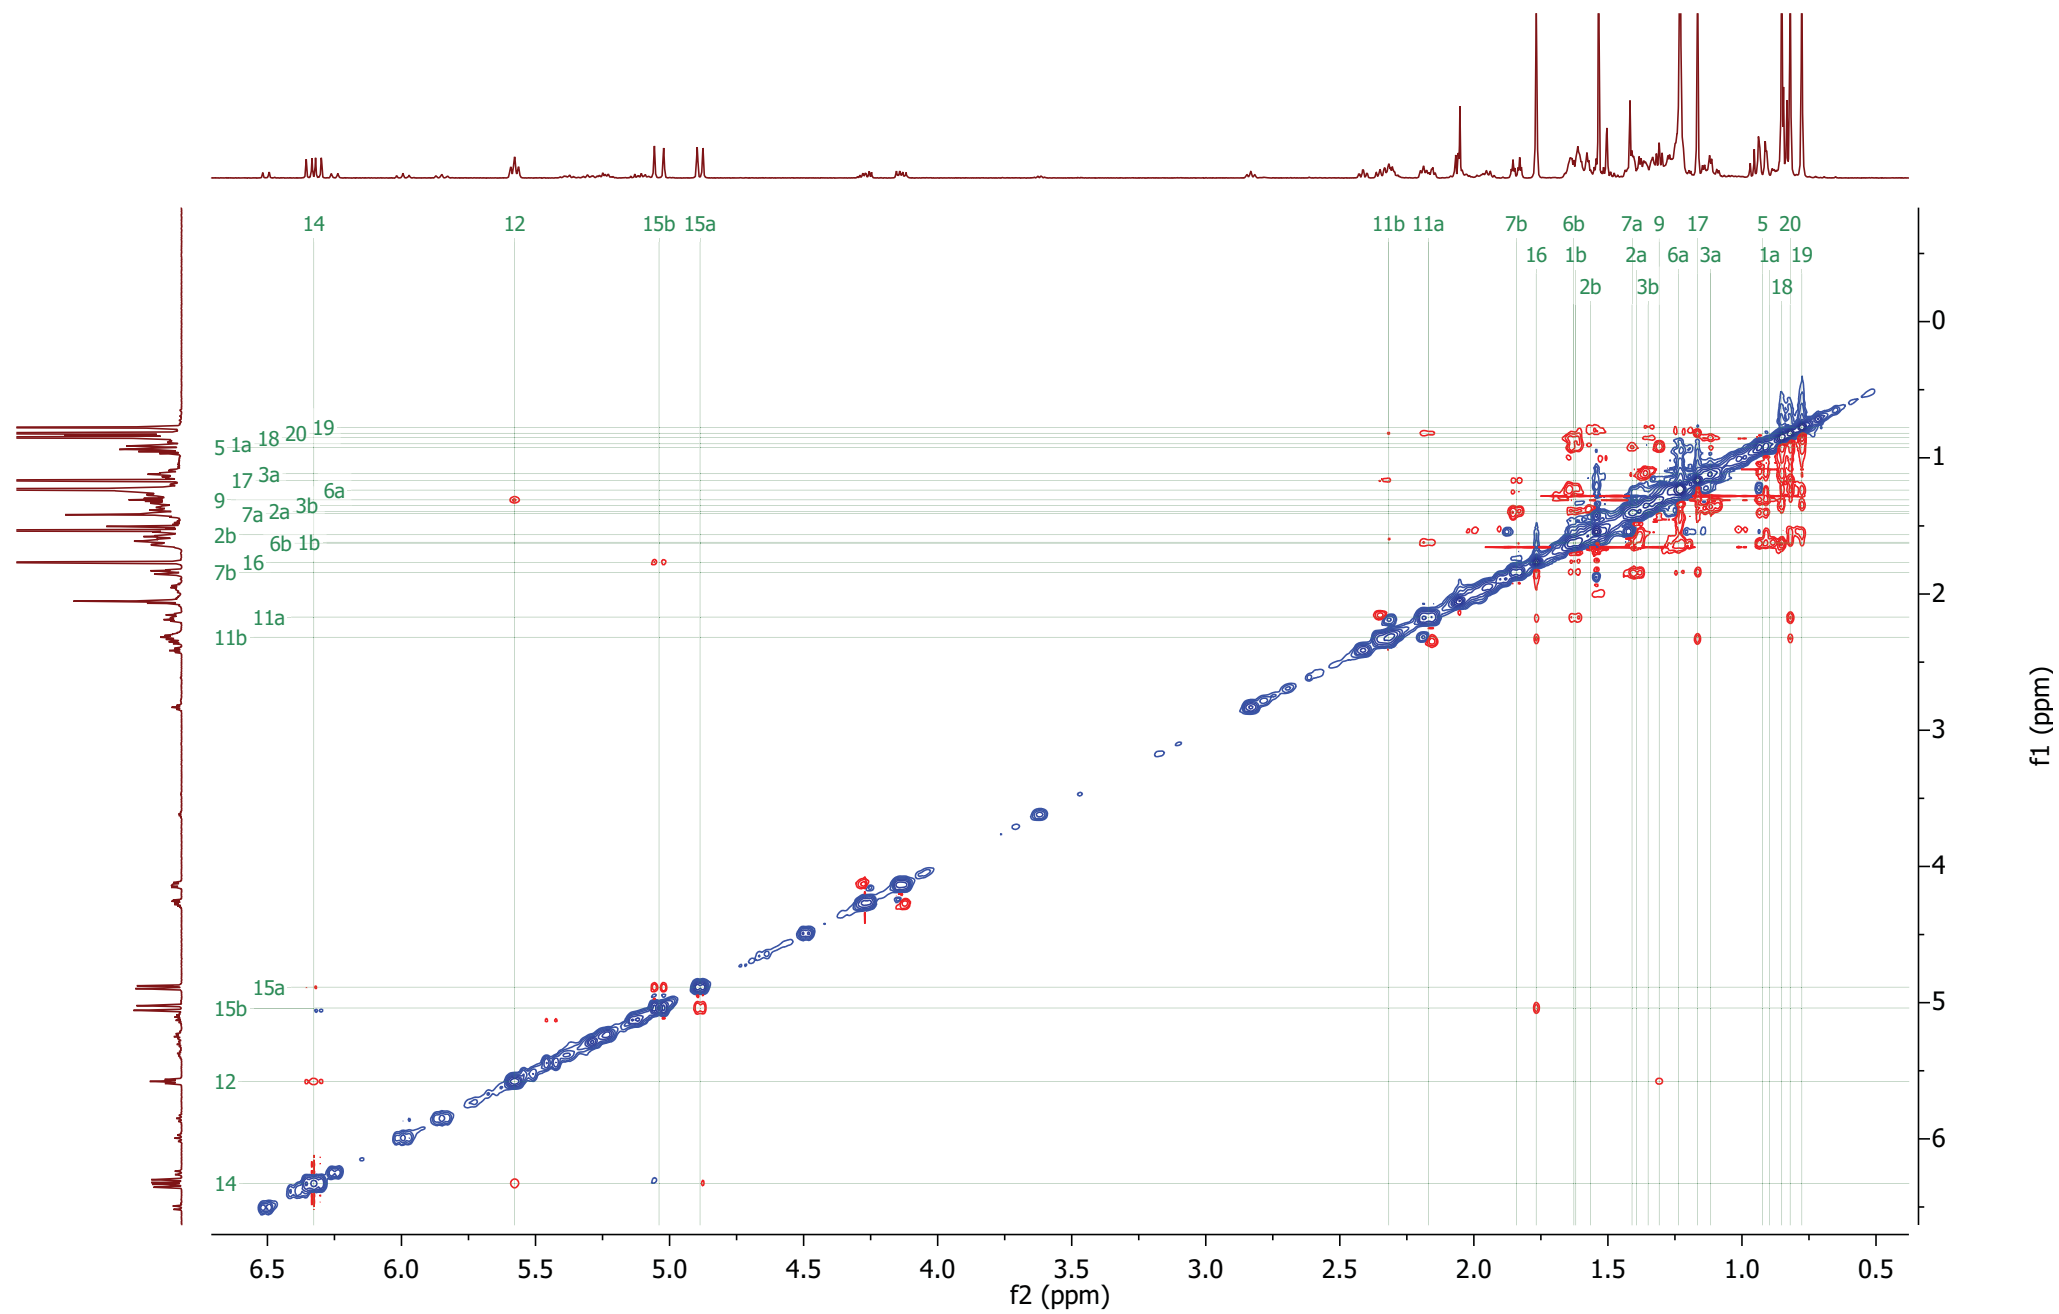

Figure S10-F.  $^1\text{H}$  NOESY of trans-abienol [11].

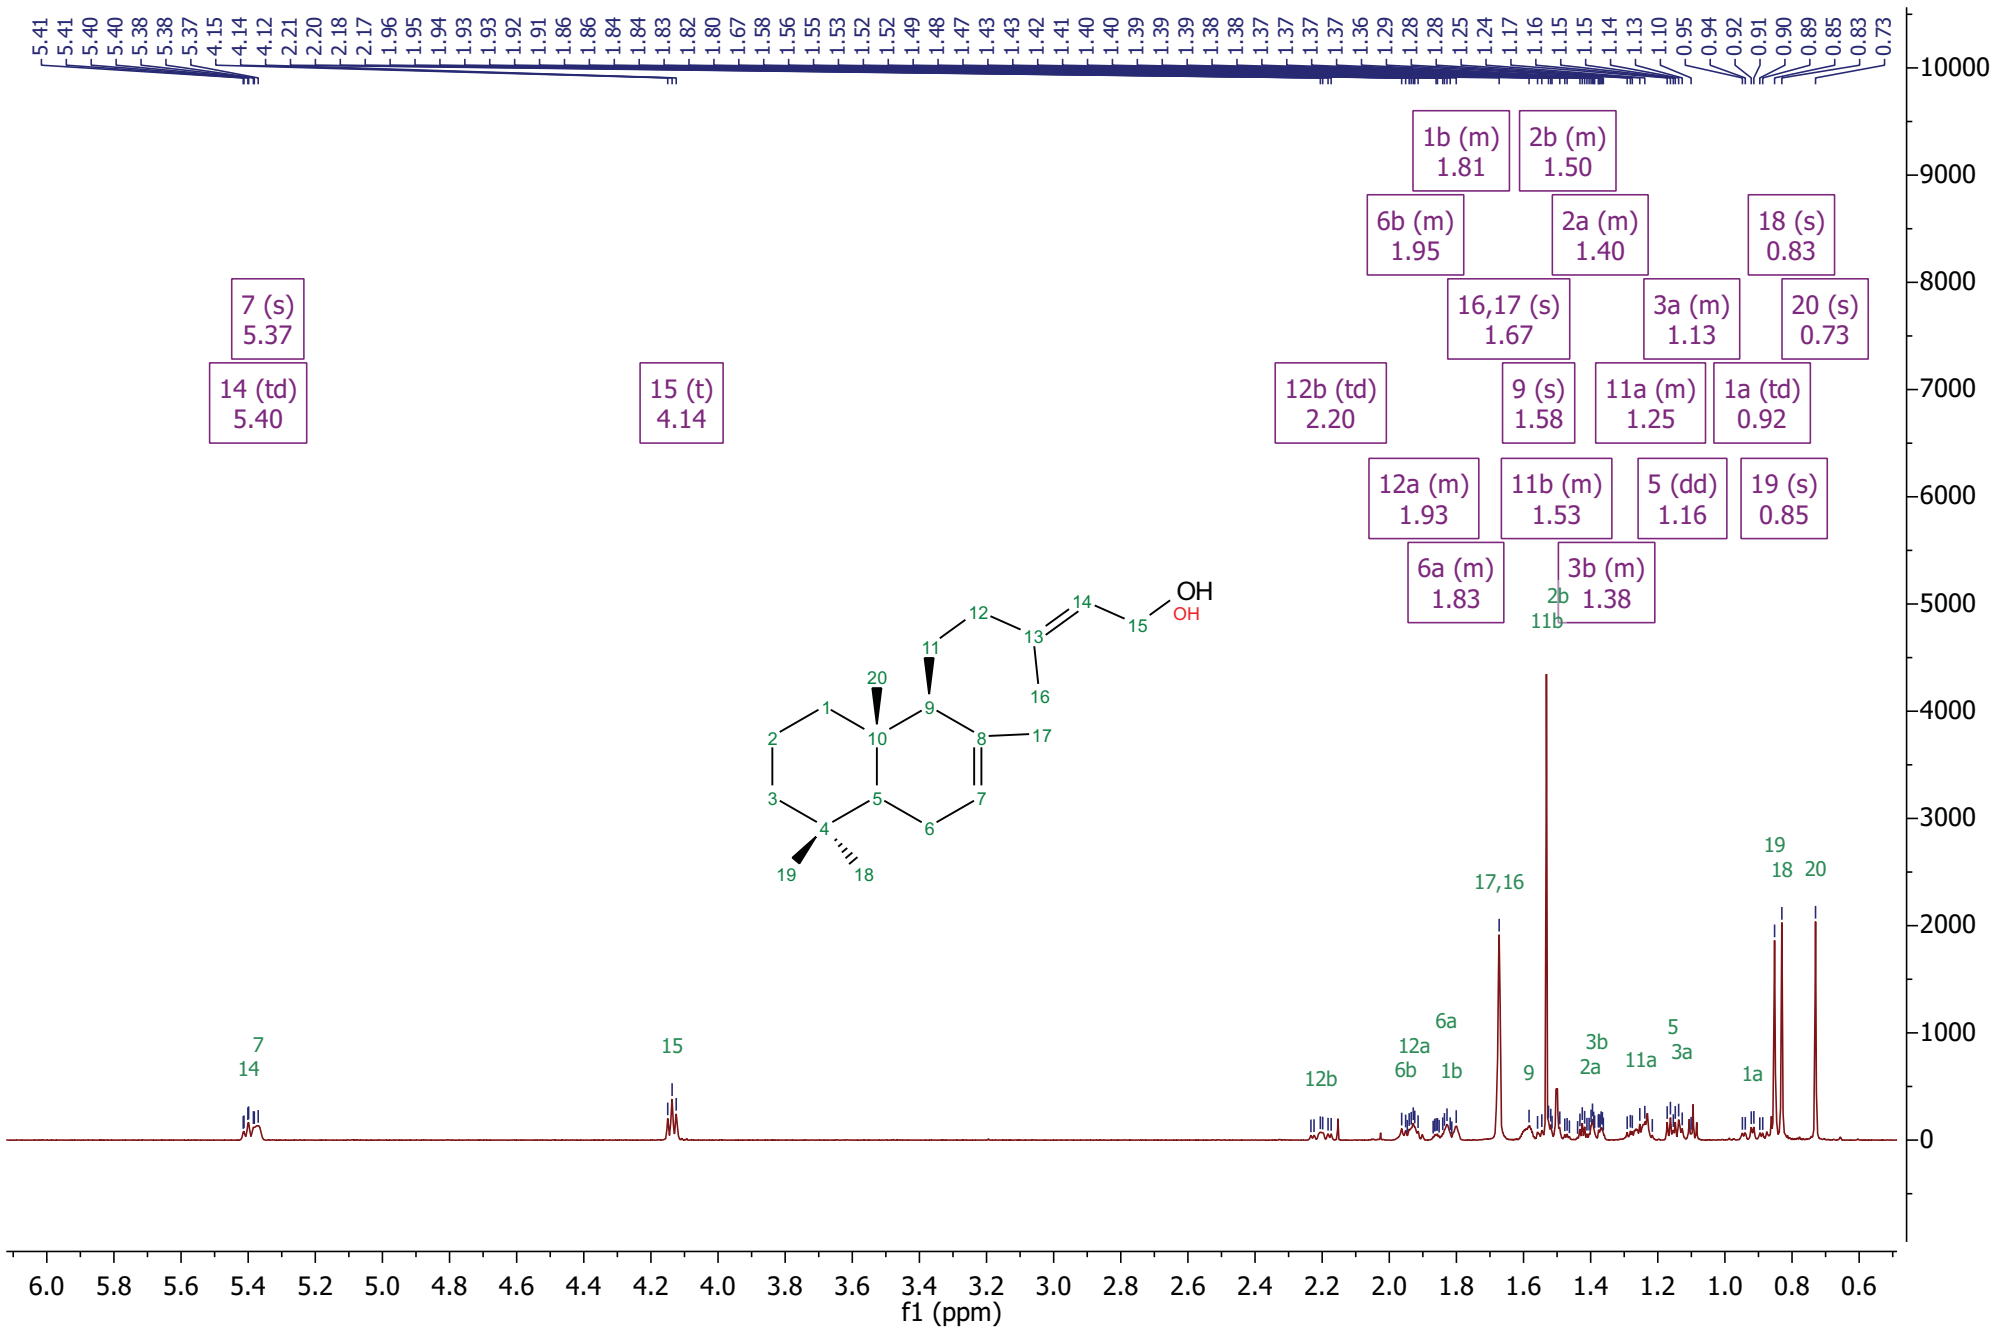

Figure S11-A. <sup>1</sup>H NMR of labda-7,13E-dien-15-ol [21a].

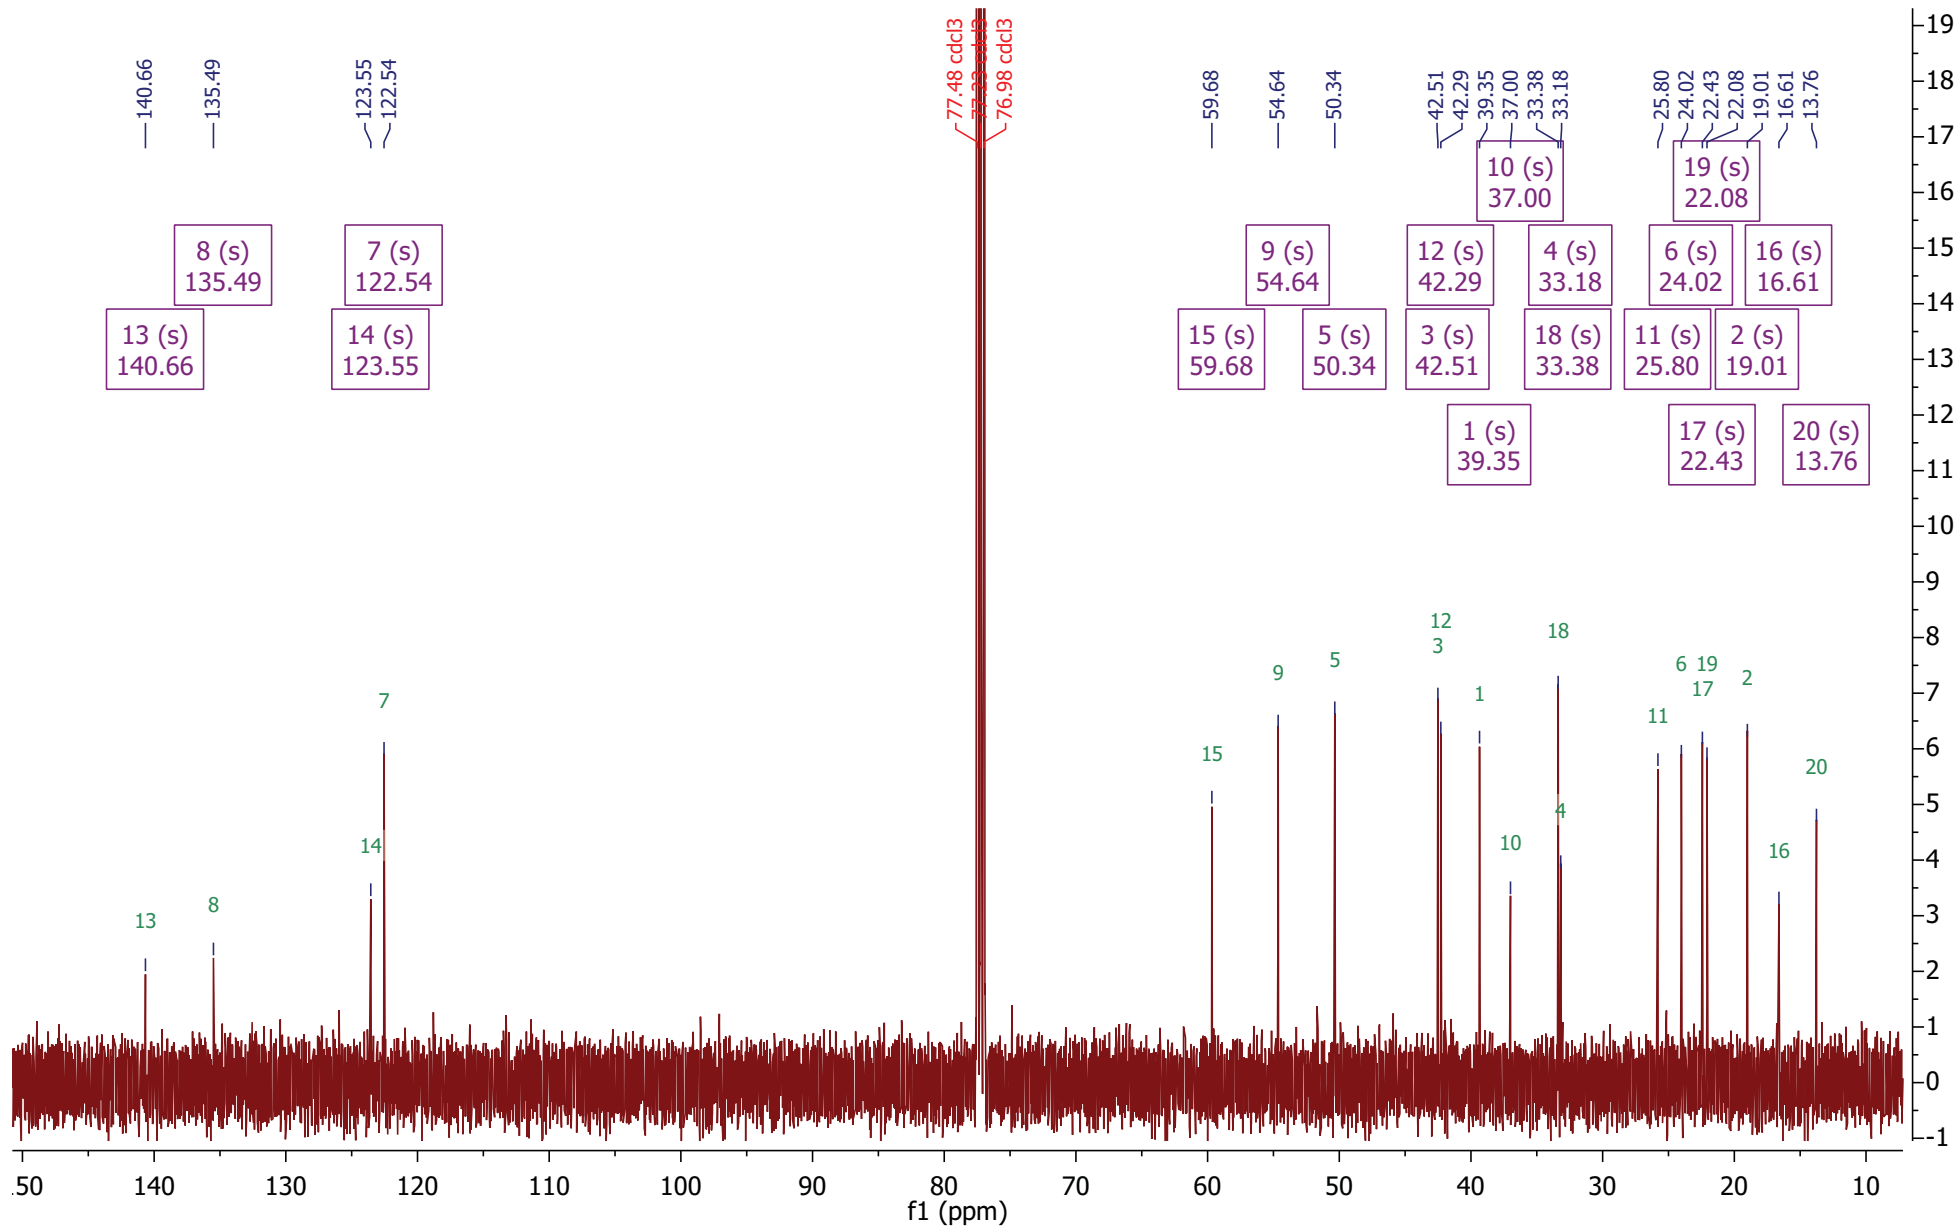

Figure S11-B.  $^{13}\text{C}$  NMR of labda-7,13E-dien-15-ol [**21a**].

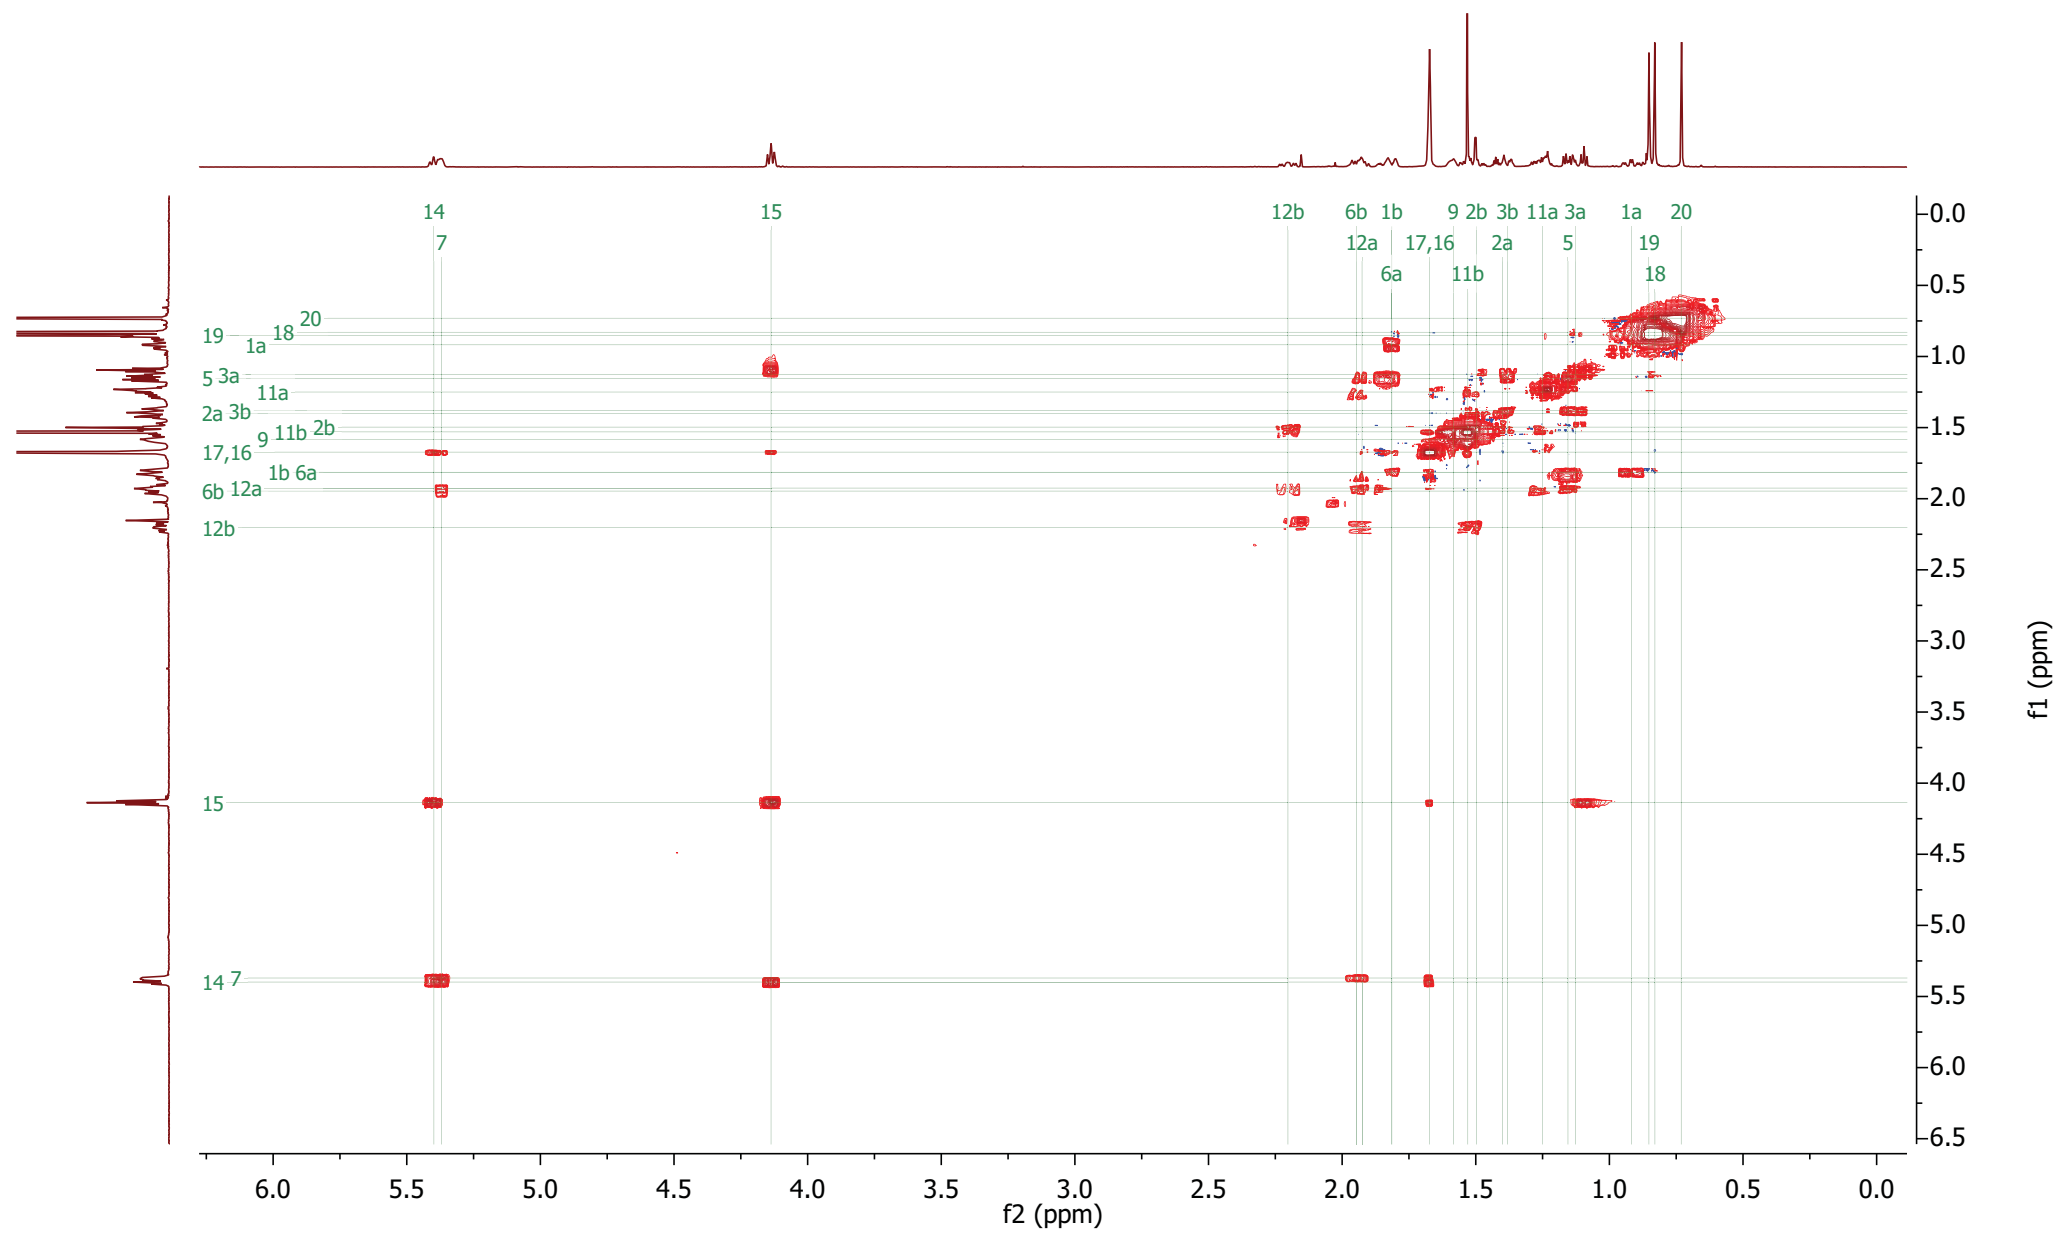



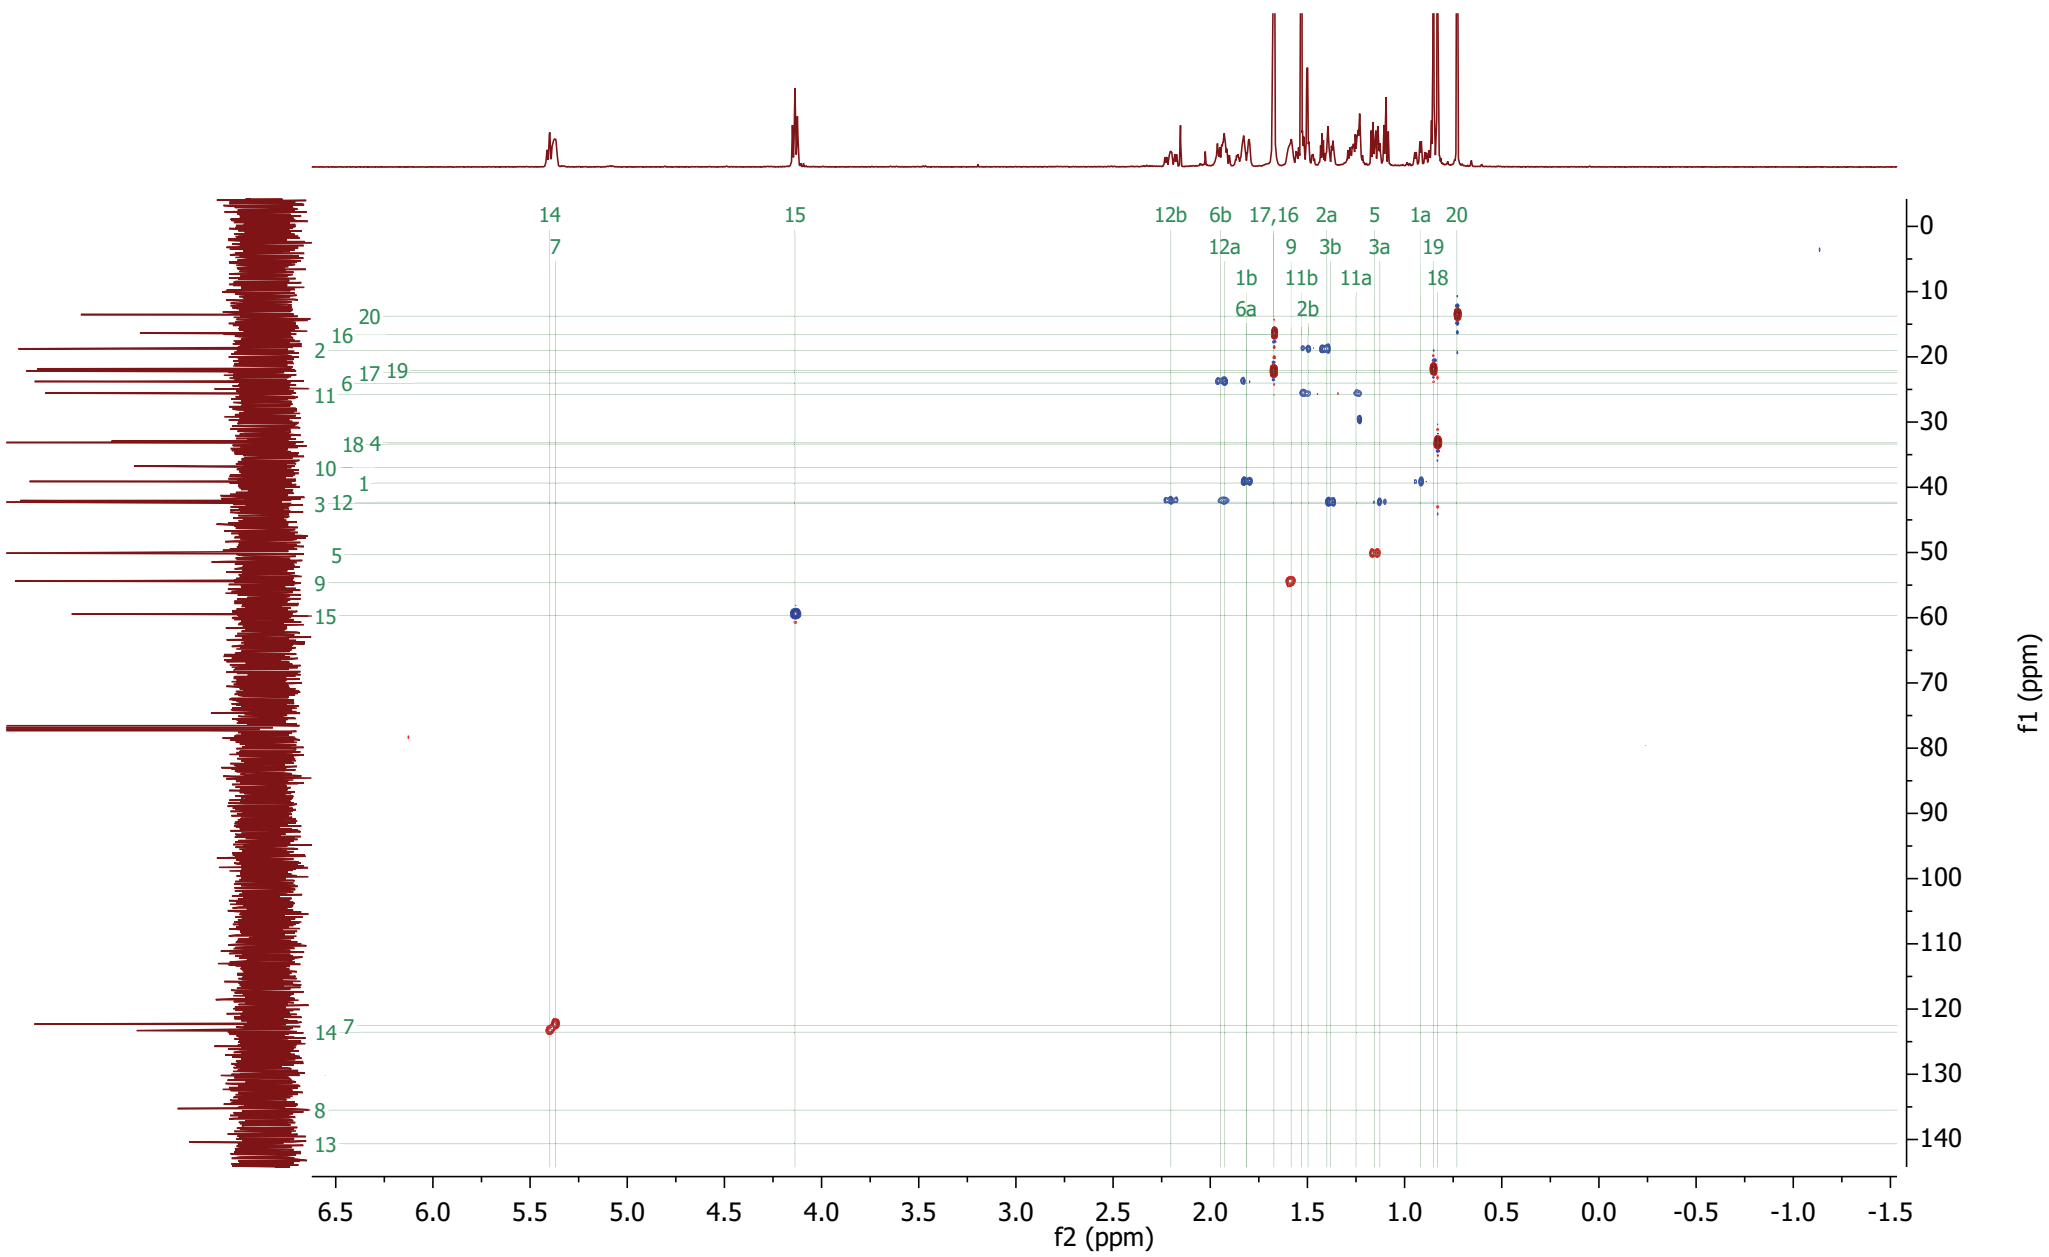

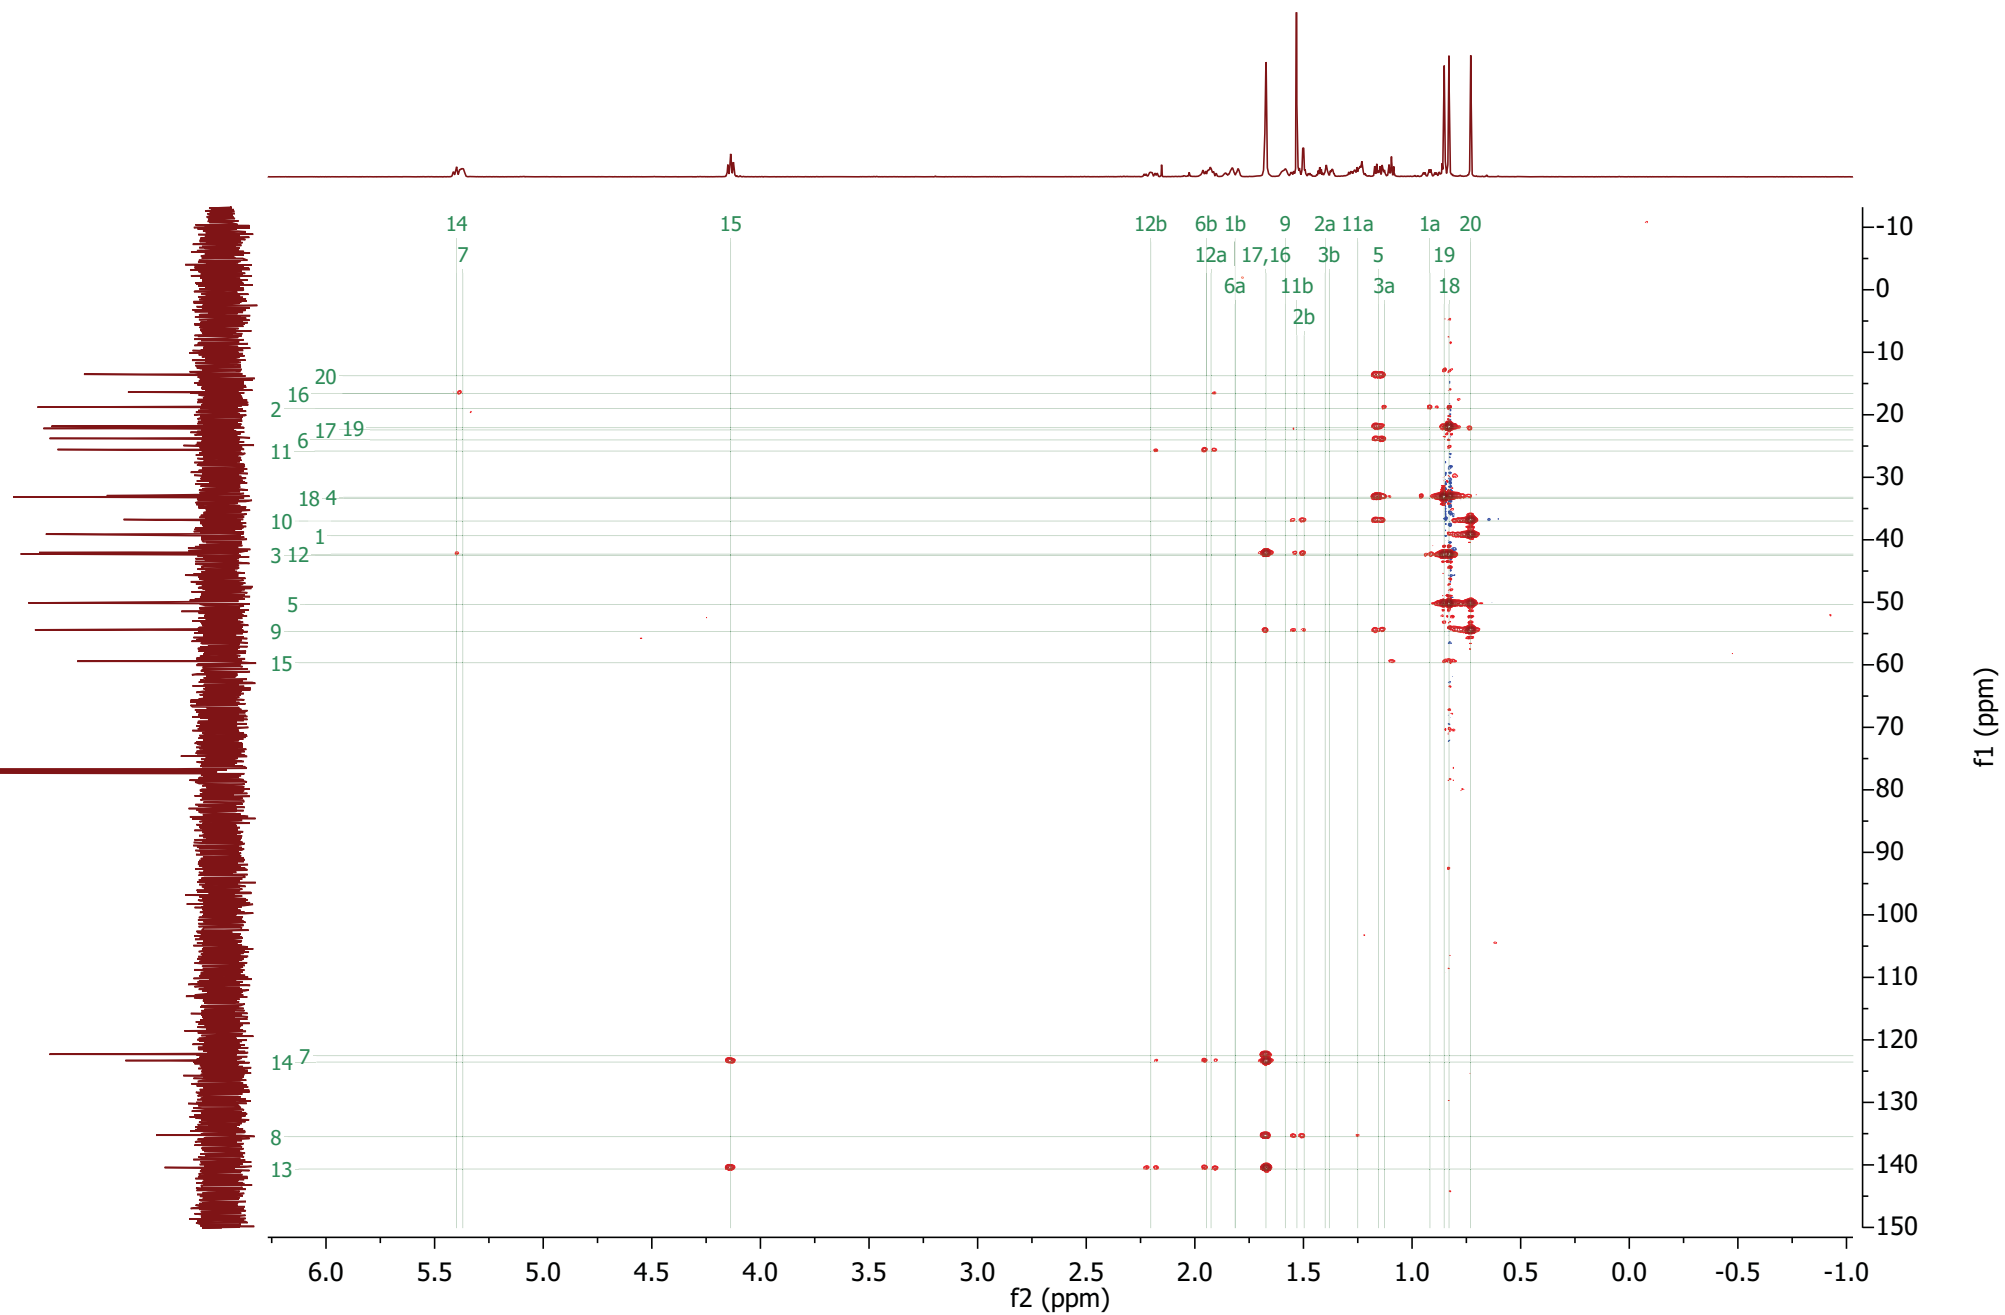

Fig S11-E.  $^1\text{H}$ - $^{13}\text{C}$  HMBC of labda-7,13E-dien-15-ol [21a]

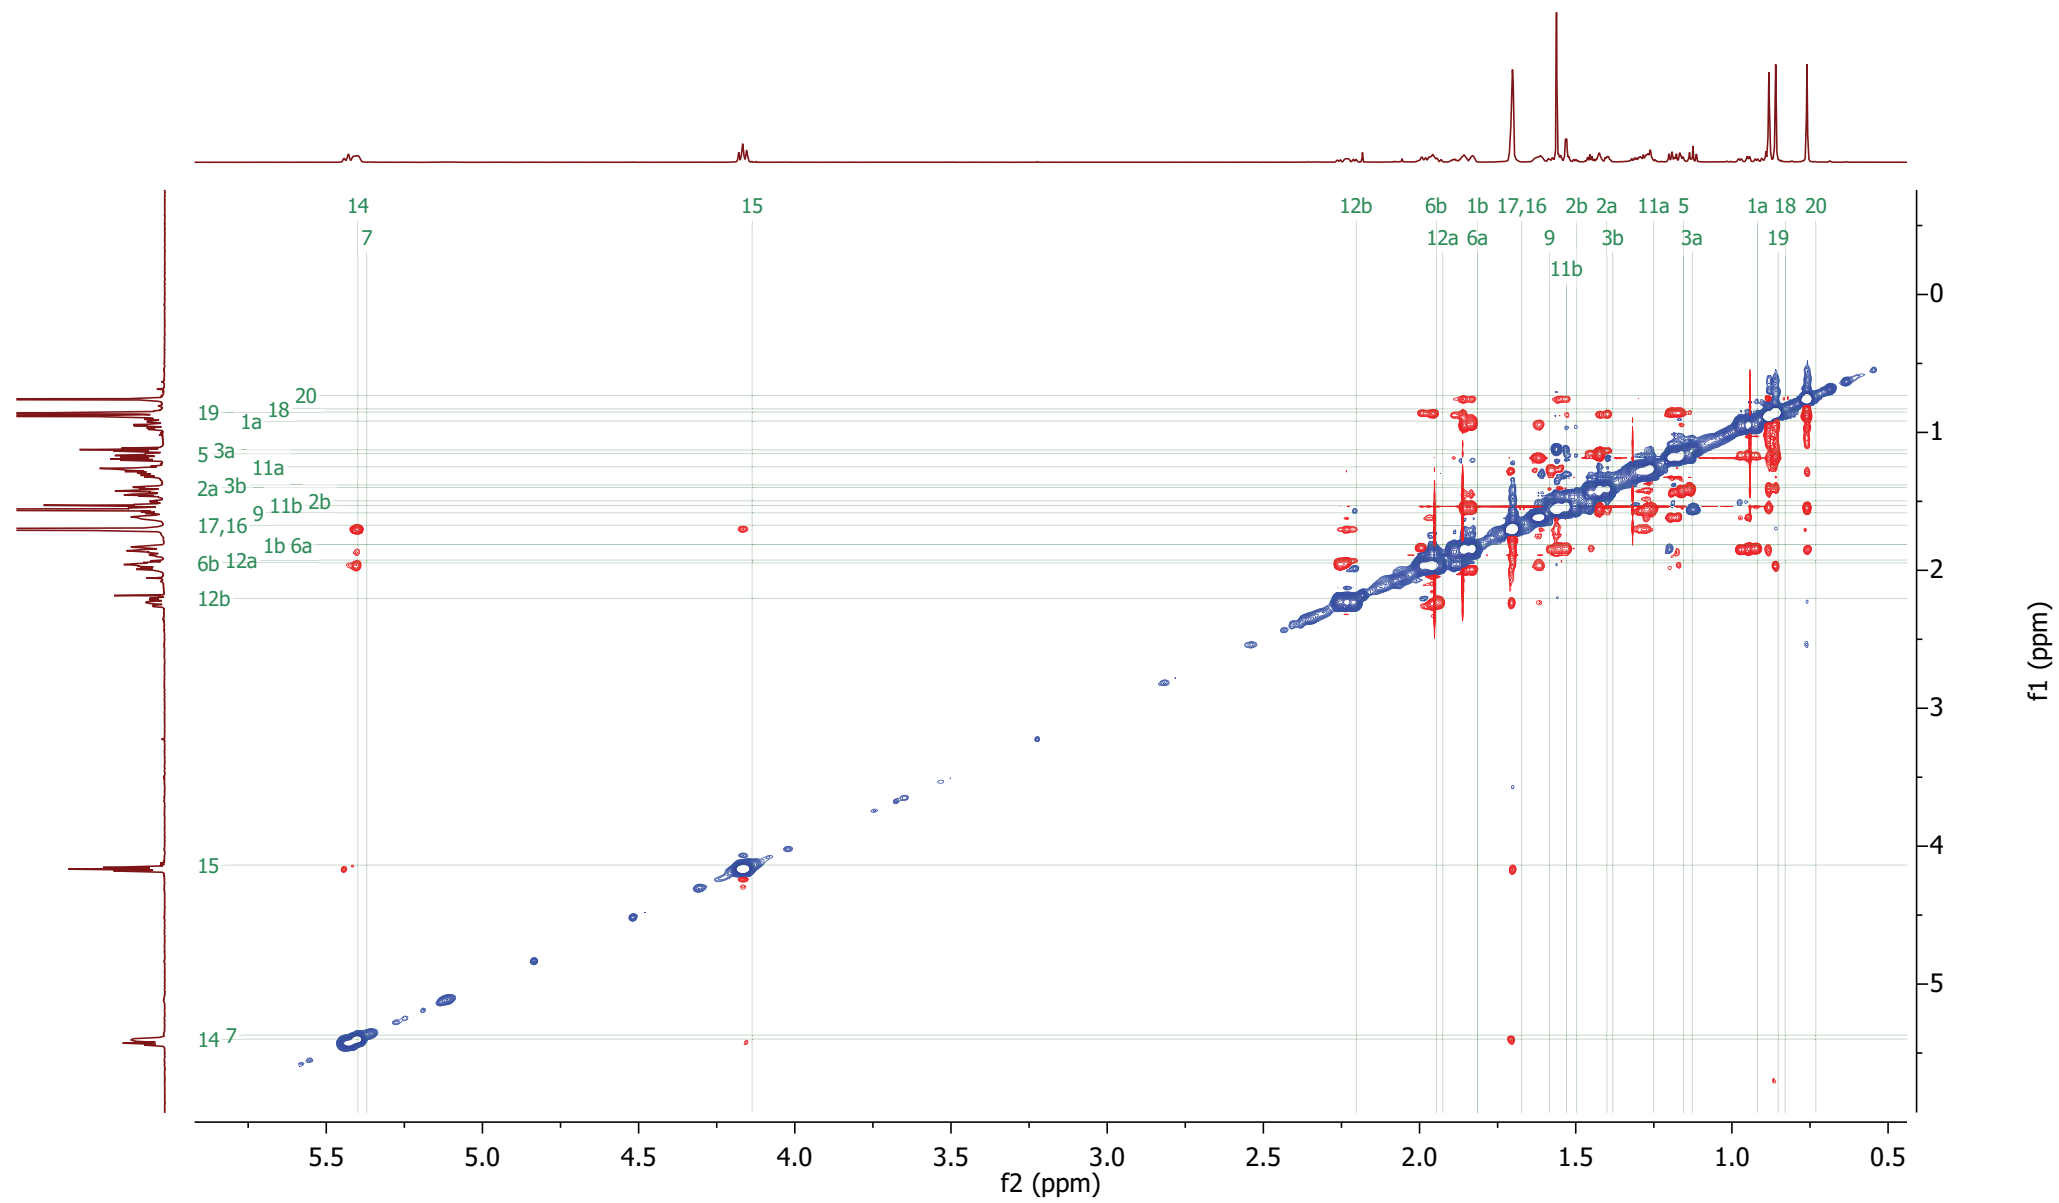

Fig S11-F. <sup>1</sup>H NOESY of lambda-7,13E-dien-15-ol [21a]

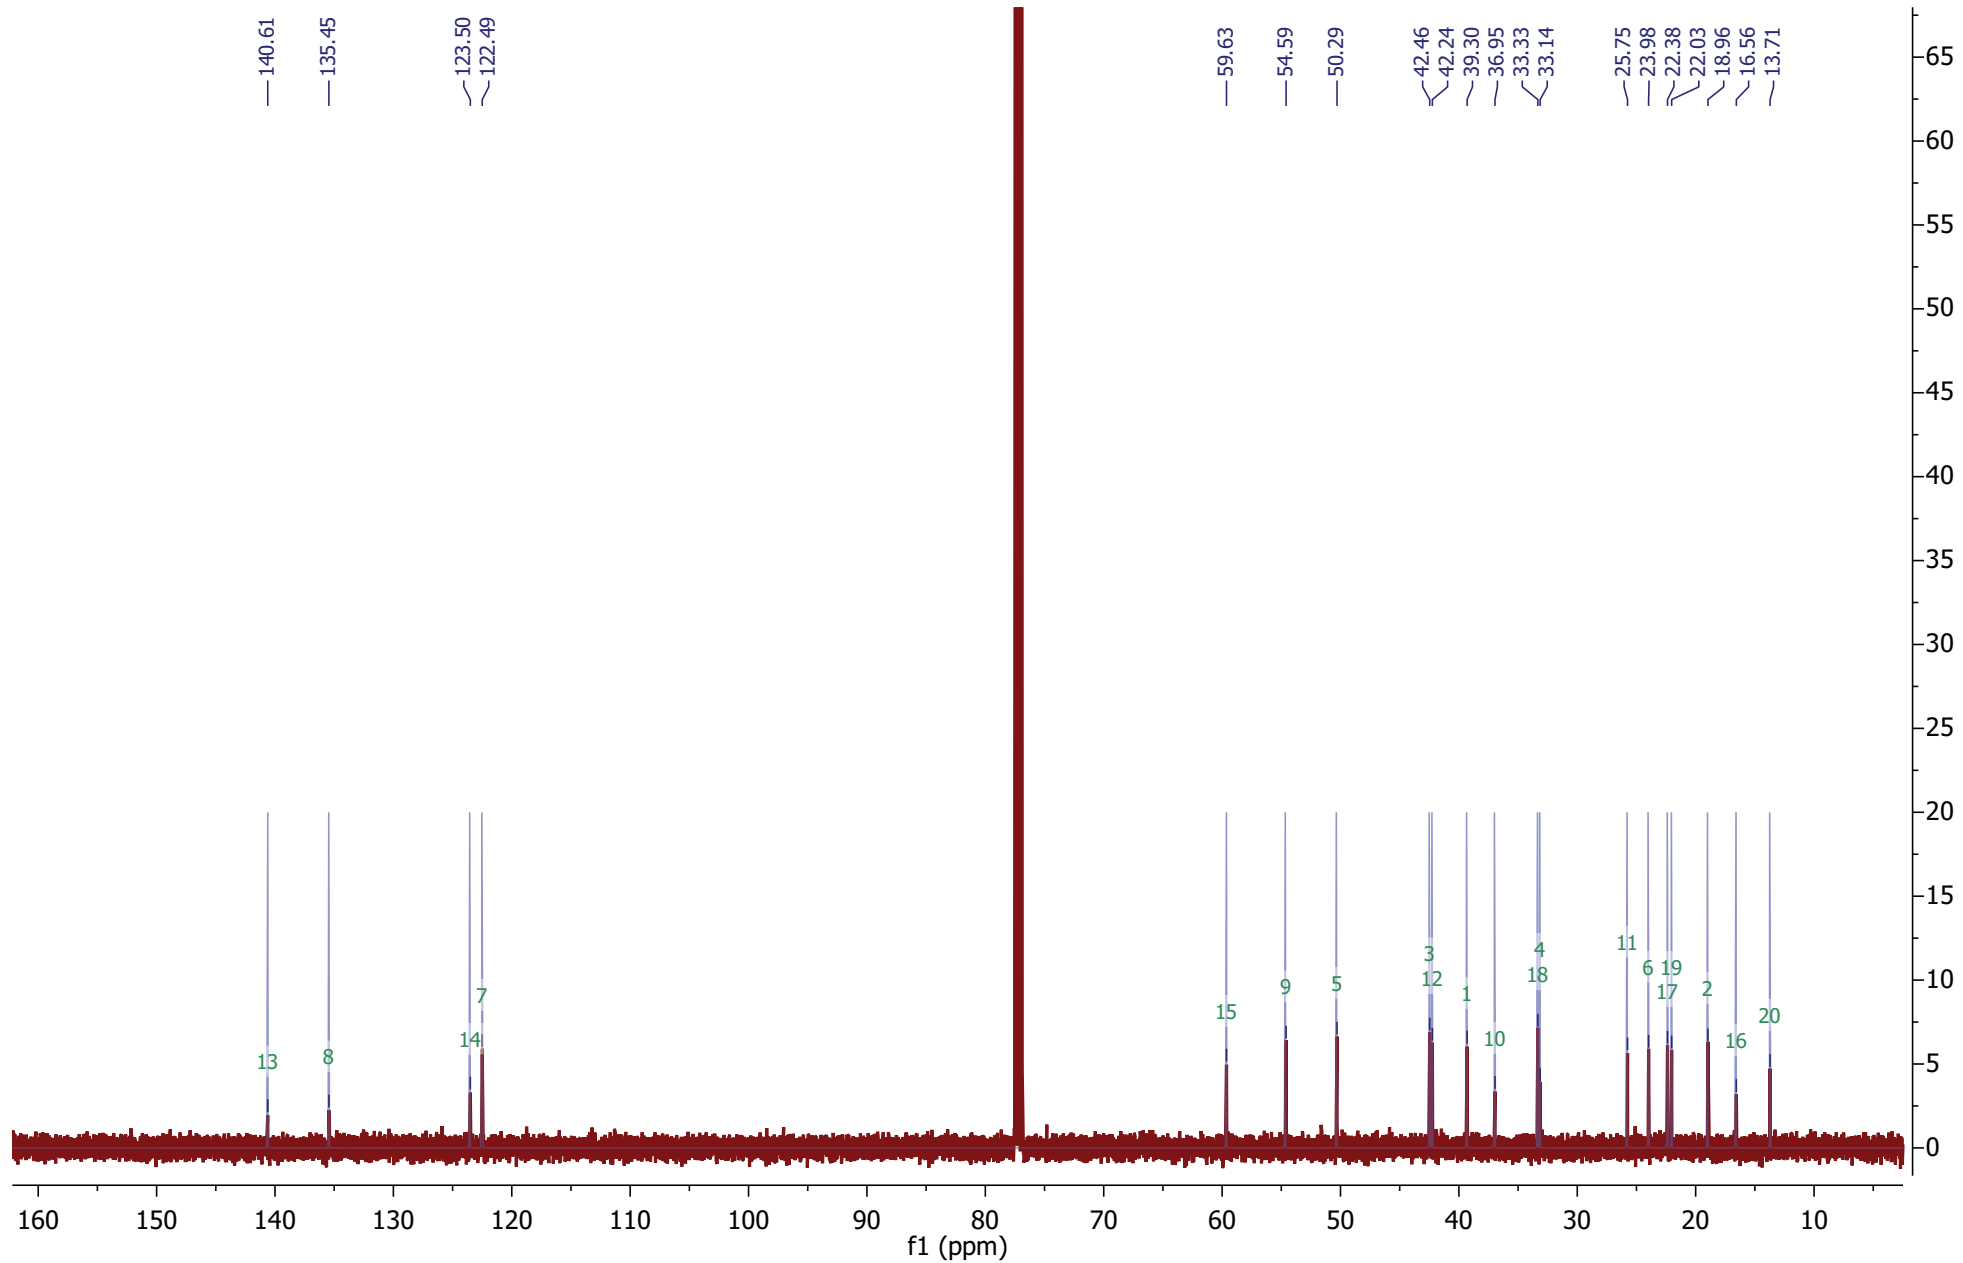

**Figure S11-G.** Overlay of  $^{13}\text{C}$  NMR of labda-7,13E-dien-15-ol [**21a**] (red) with  $^{13}\text{C}$  NMR spectrum (blue) reconstructed from shifts reported for the same compound by Mafu et al. (2011) (DOI: 10.1002/cbic.201100336).

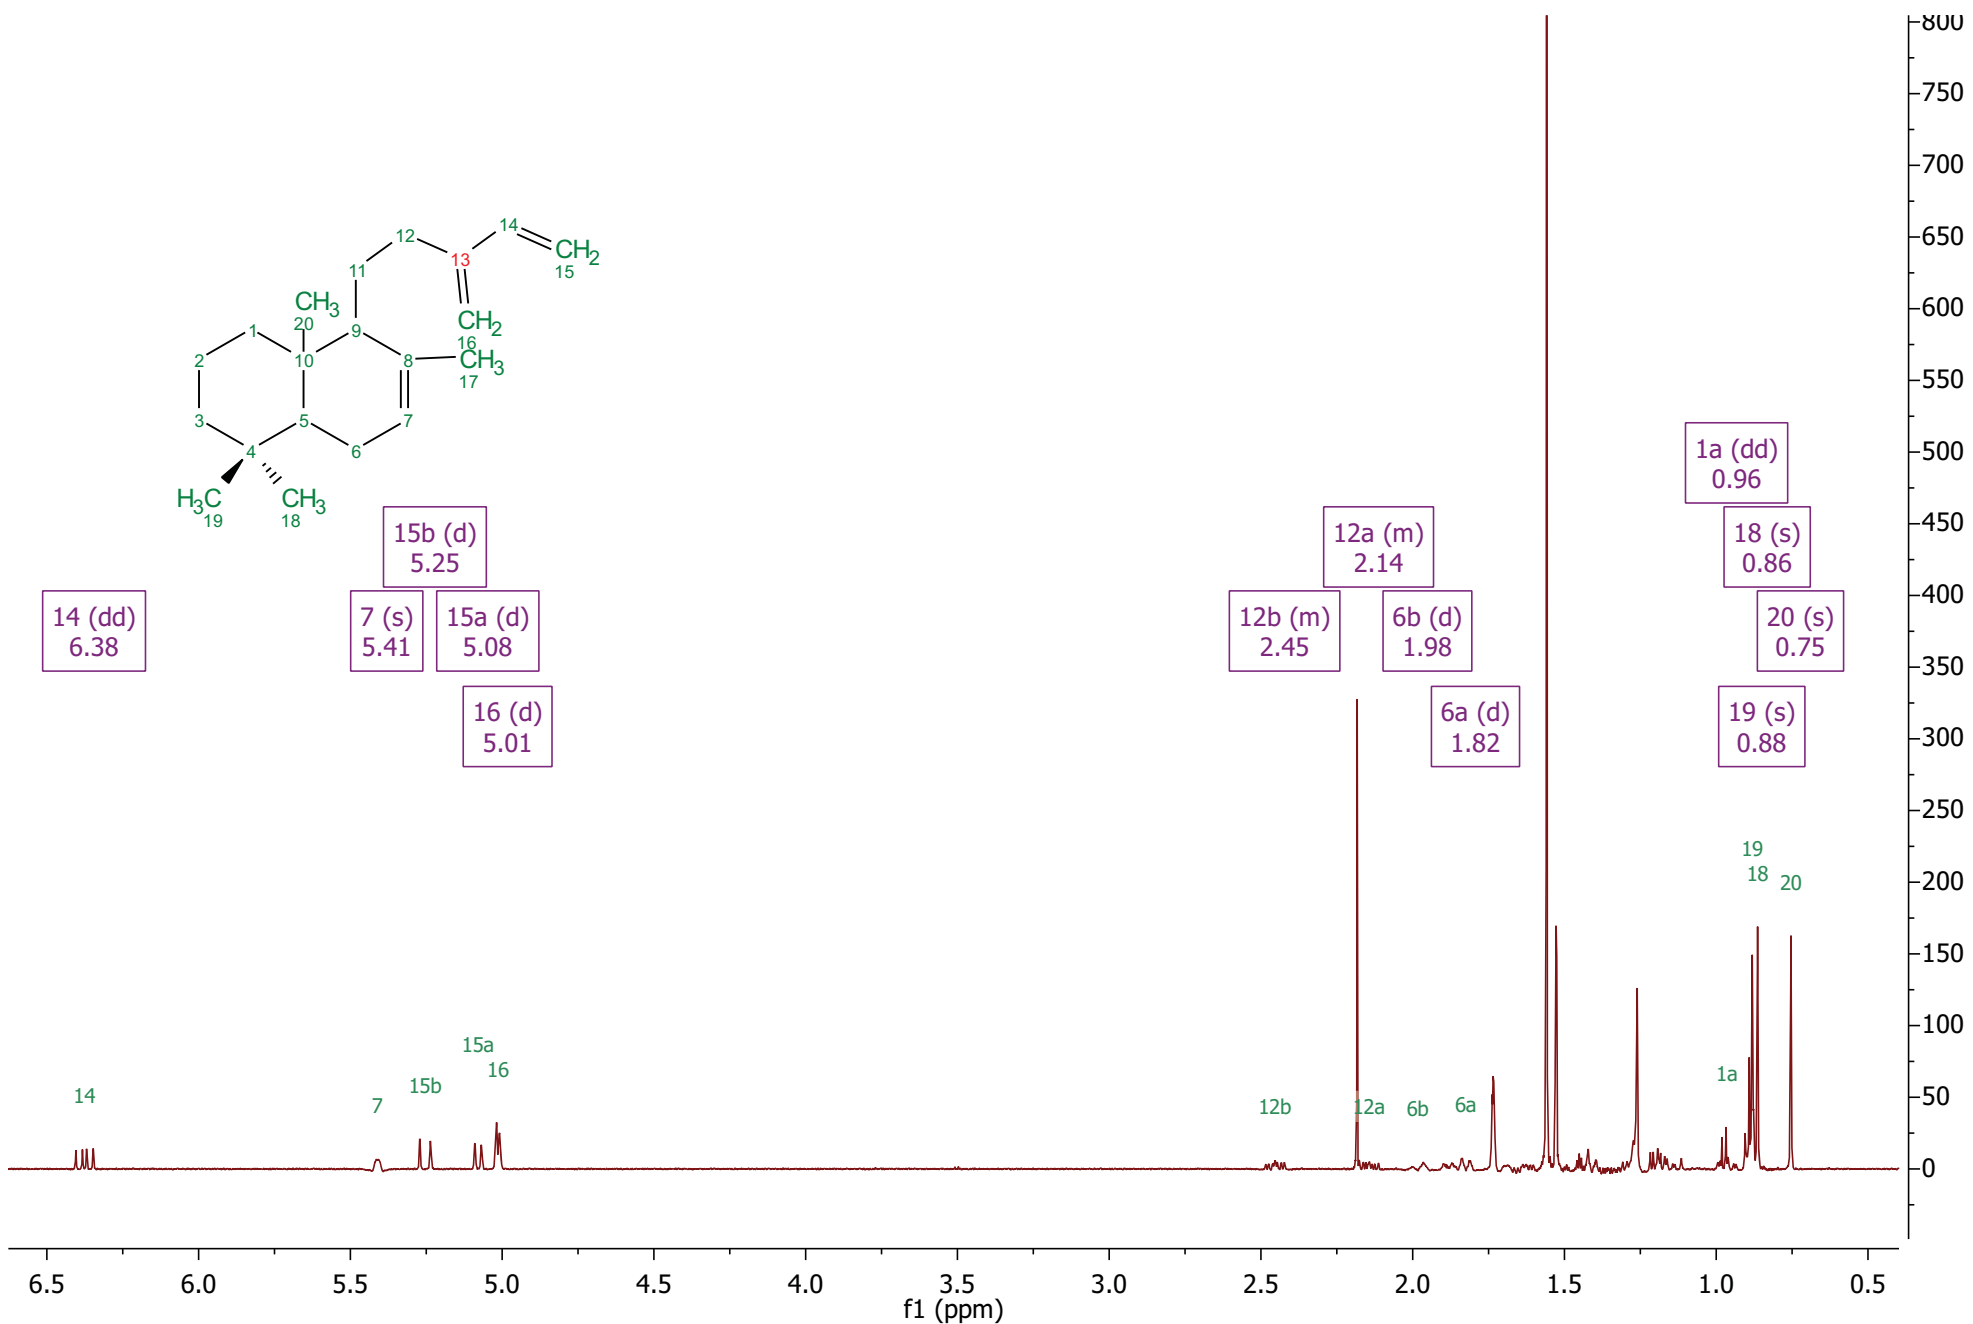

Figure S12-A. <sup>1</sup>H NMR of partially purified labda-7,13(16),14-triene [22].

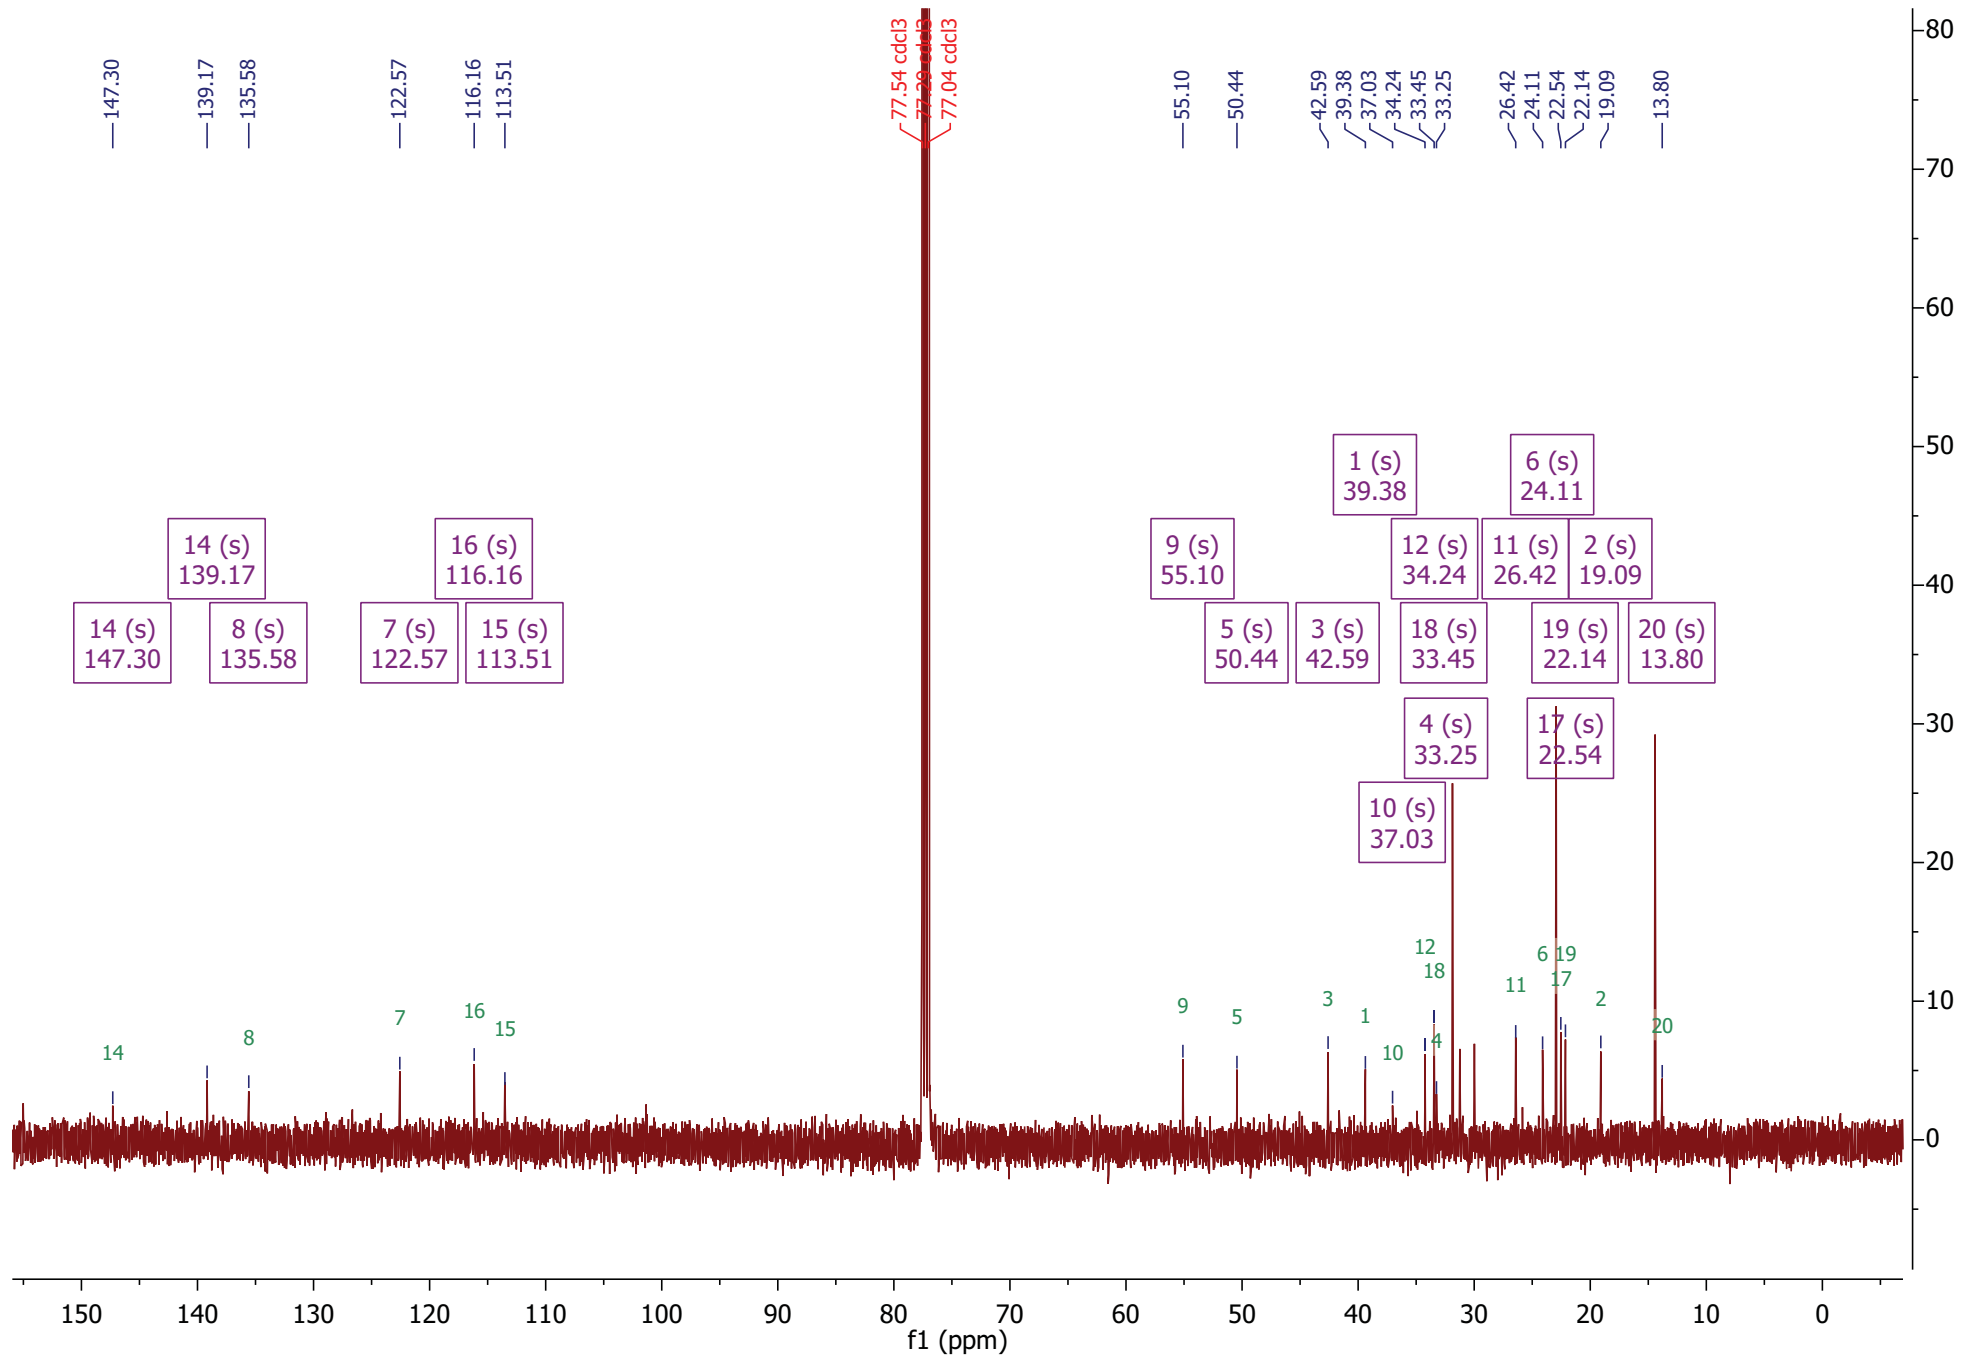

Figure S12-B.  $^{13}\text{C}$  NMR of partially purified labda-7,13(16),14-triene [22].

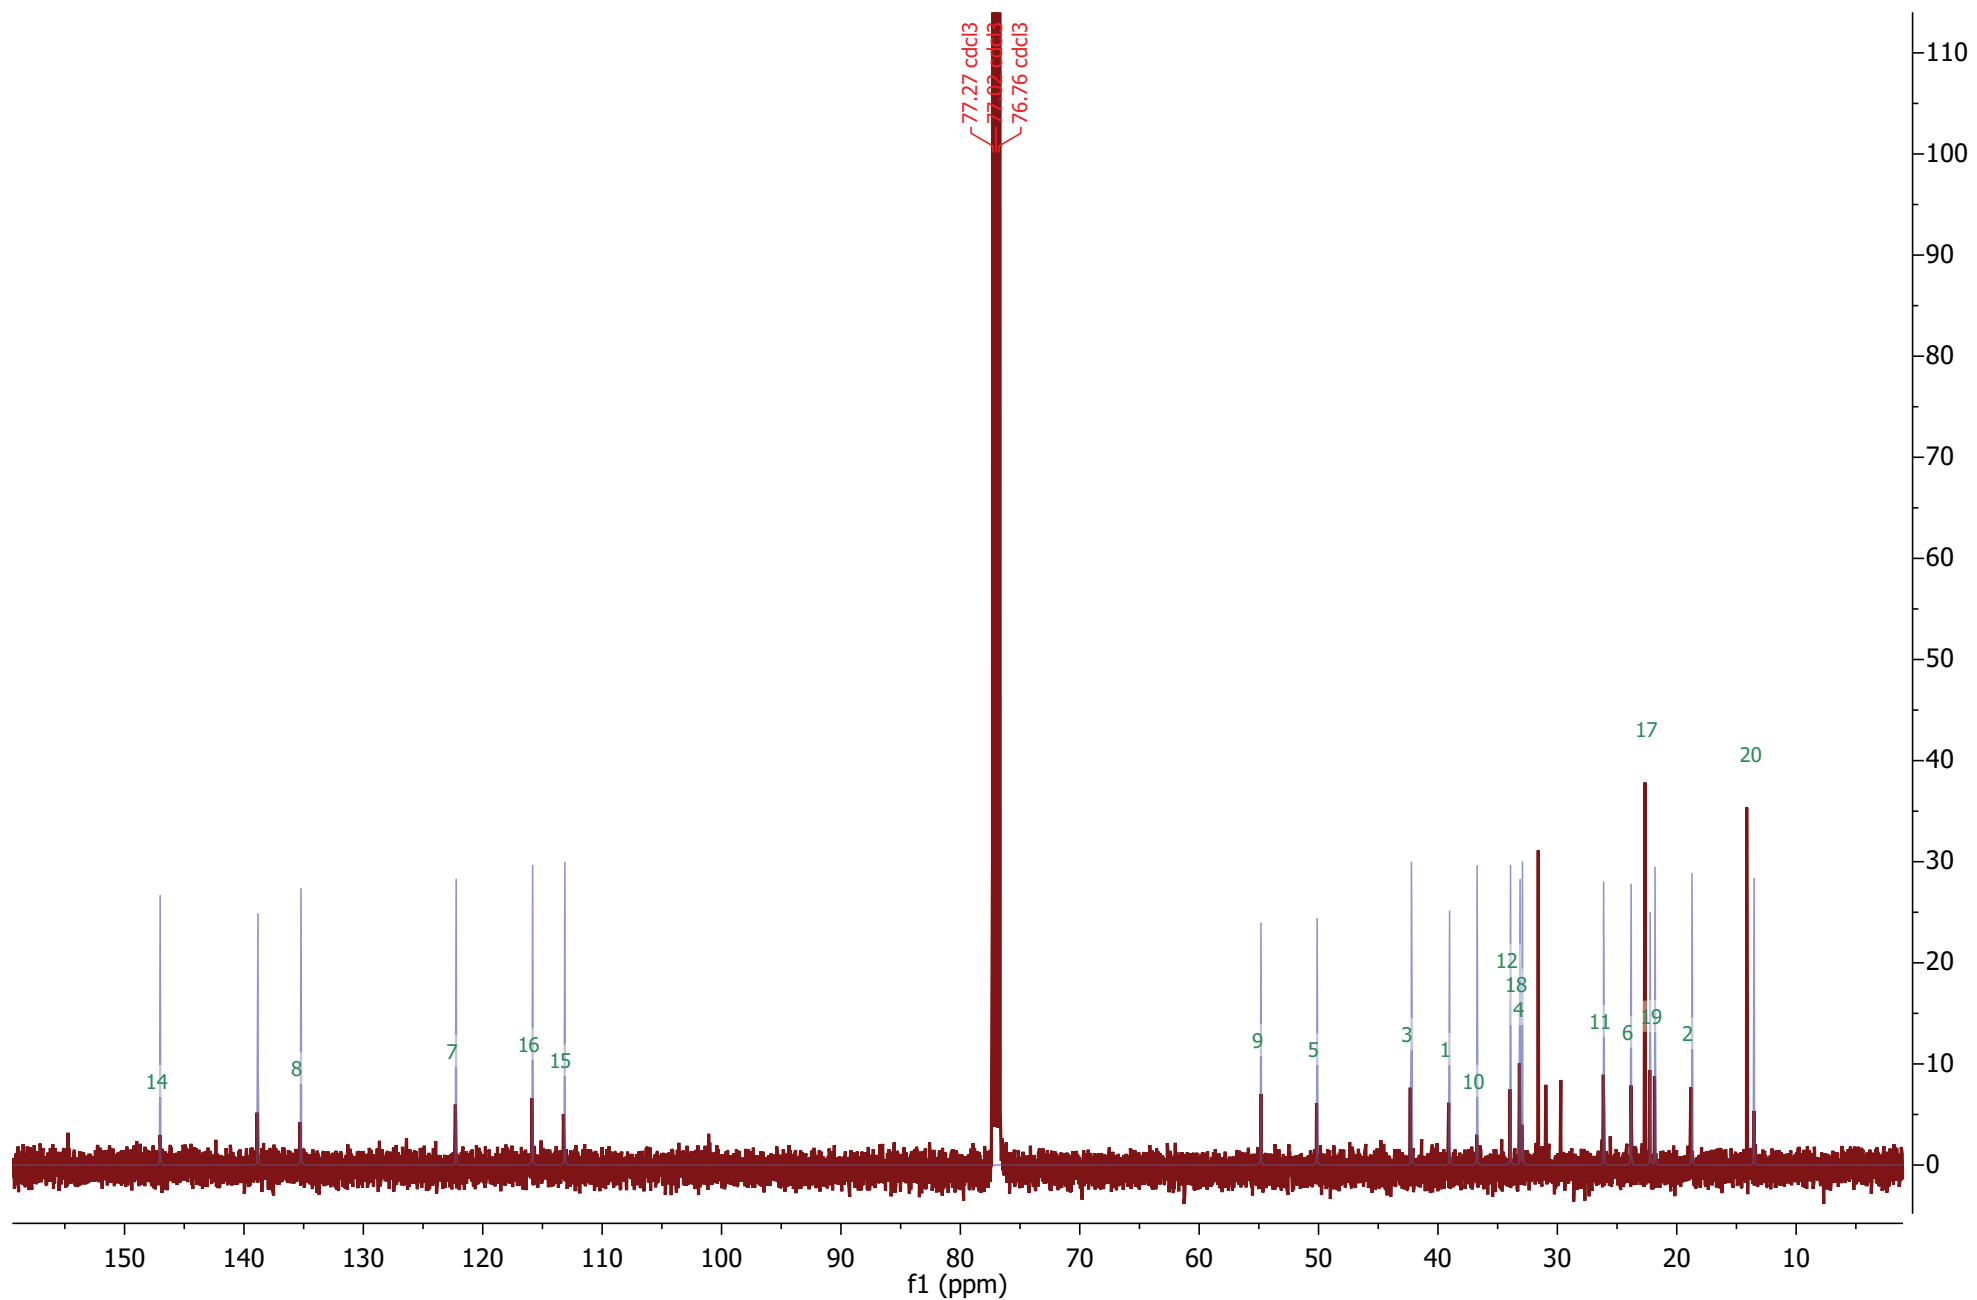

**Figure S12-C.** Overlay of  $^{13}\text{C}$  NMR of partially purified labda-7,13(16),14-triene [**22**] (red) with  $^{13}\text{C}$  NMR spectrum (blue) reconstructed from shifts reported for the same compound by Jia et al. (2016) (DOI: 10.1016/j.ymben.2016.04.001).

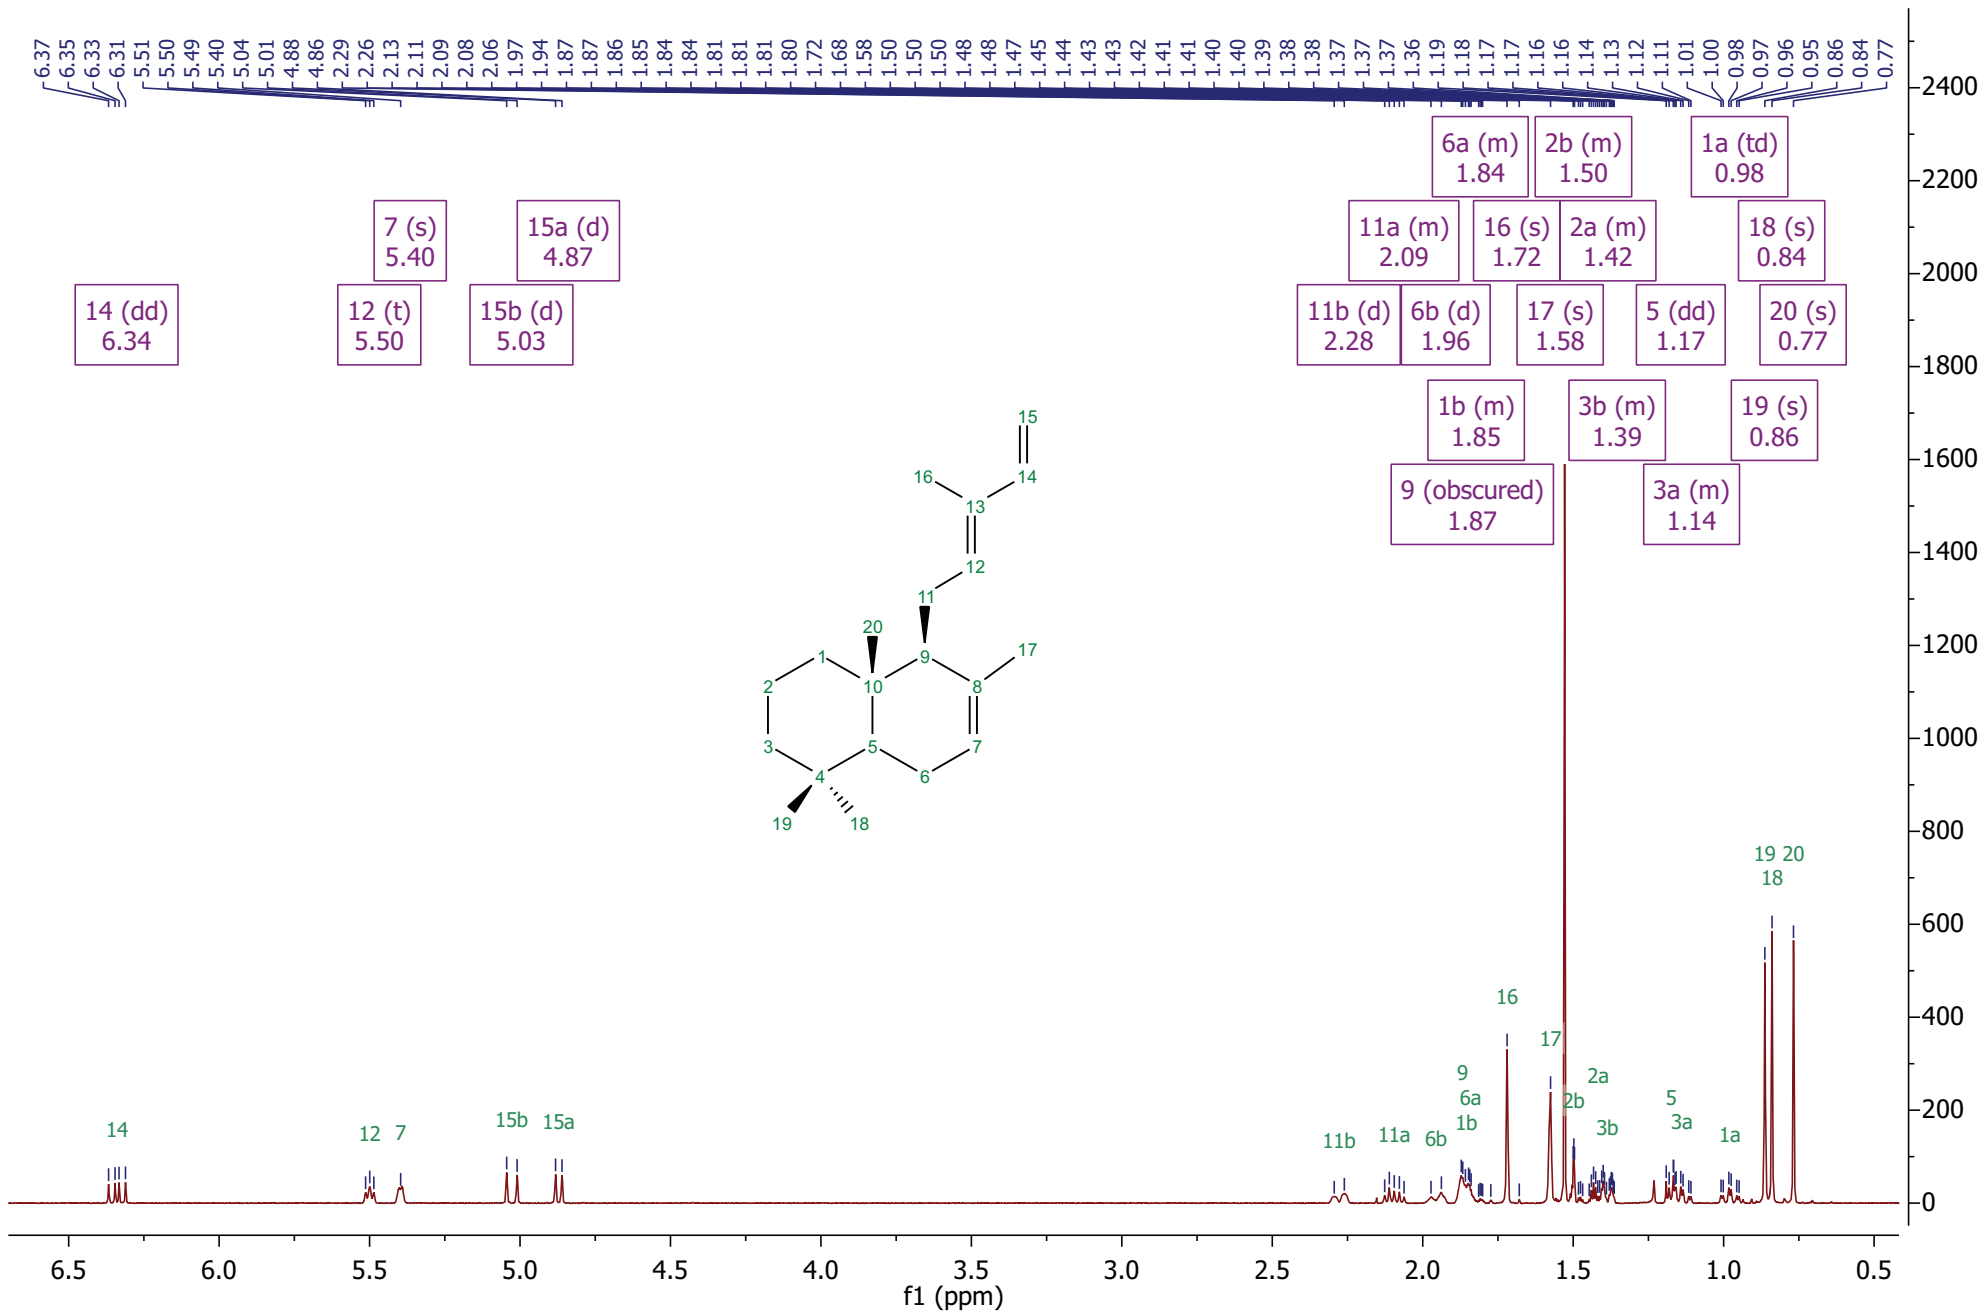

Figure S13-A. <sup>1</sup>H NMR of labda-7,12E,14-triene [24].



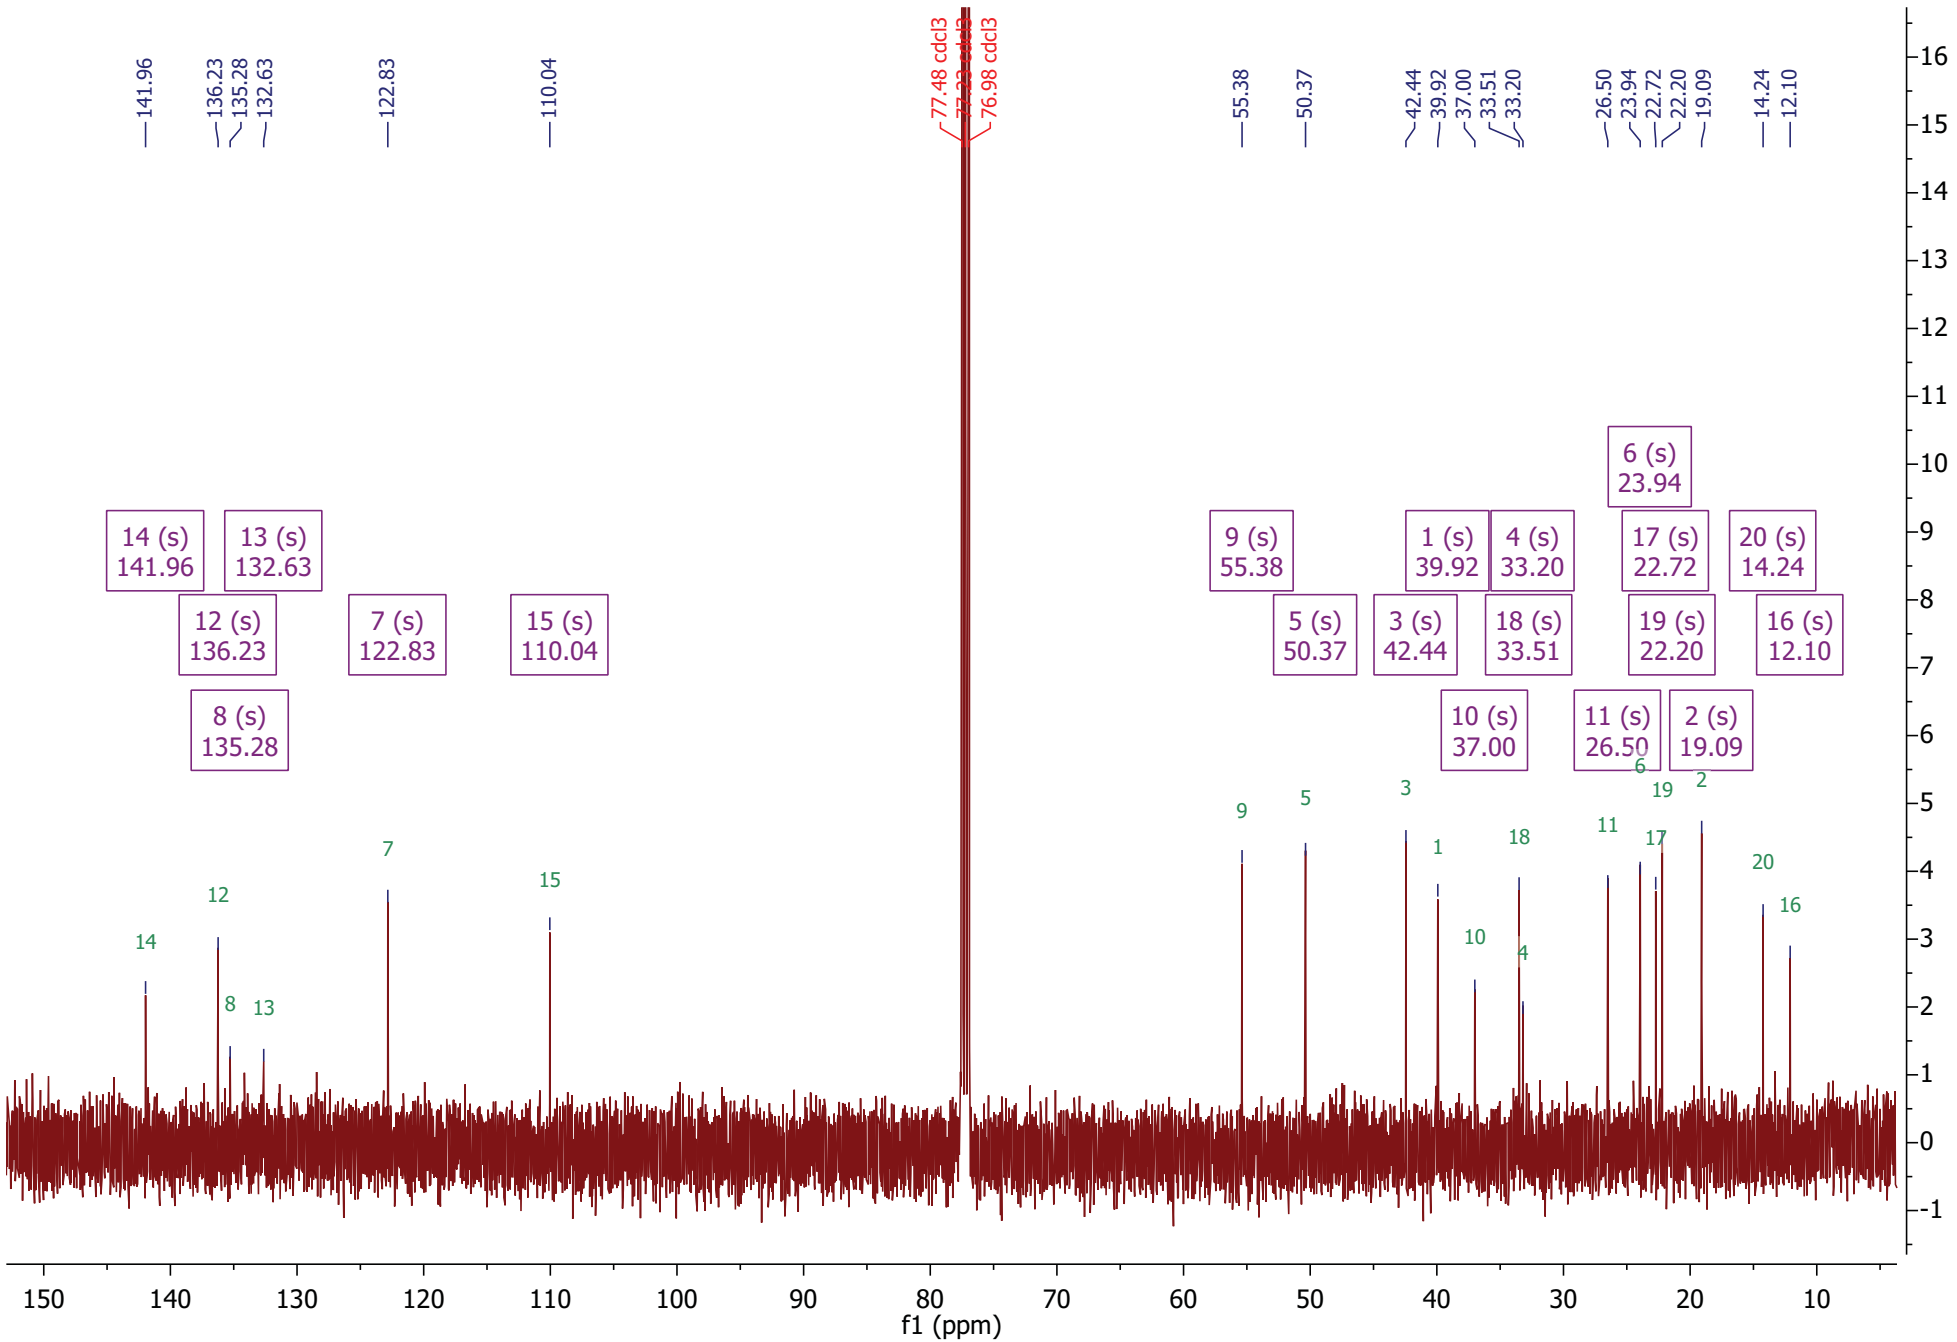

Figure S13-B.  $^{13}\text{C}$  NMR of labda-7,12E,14-triene [24].

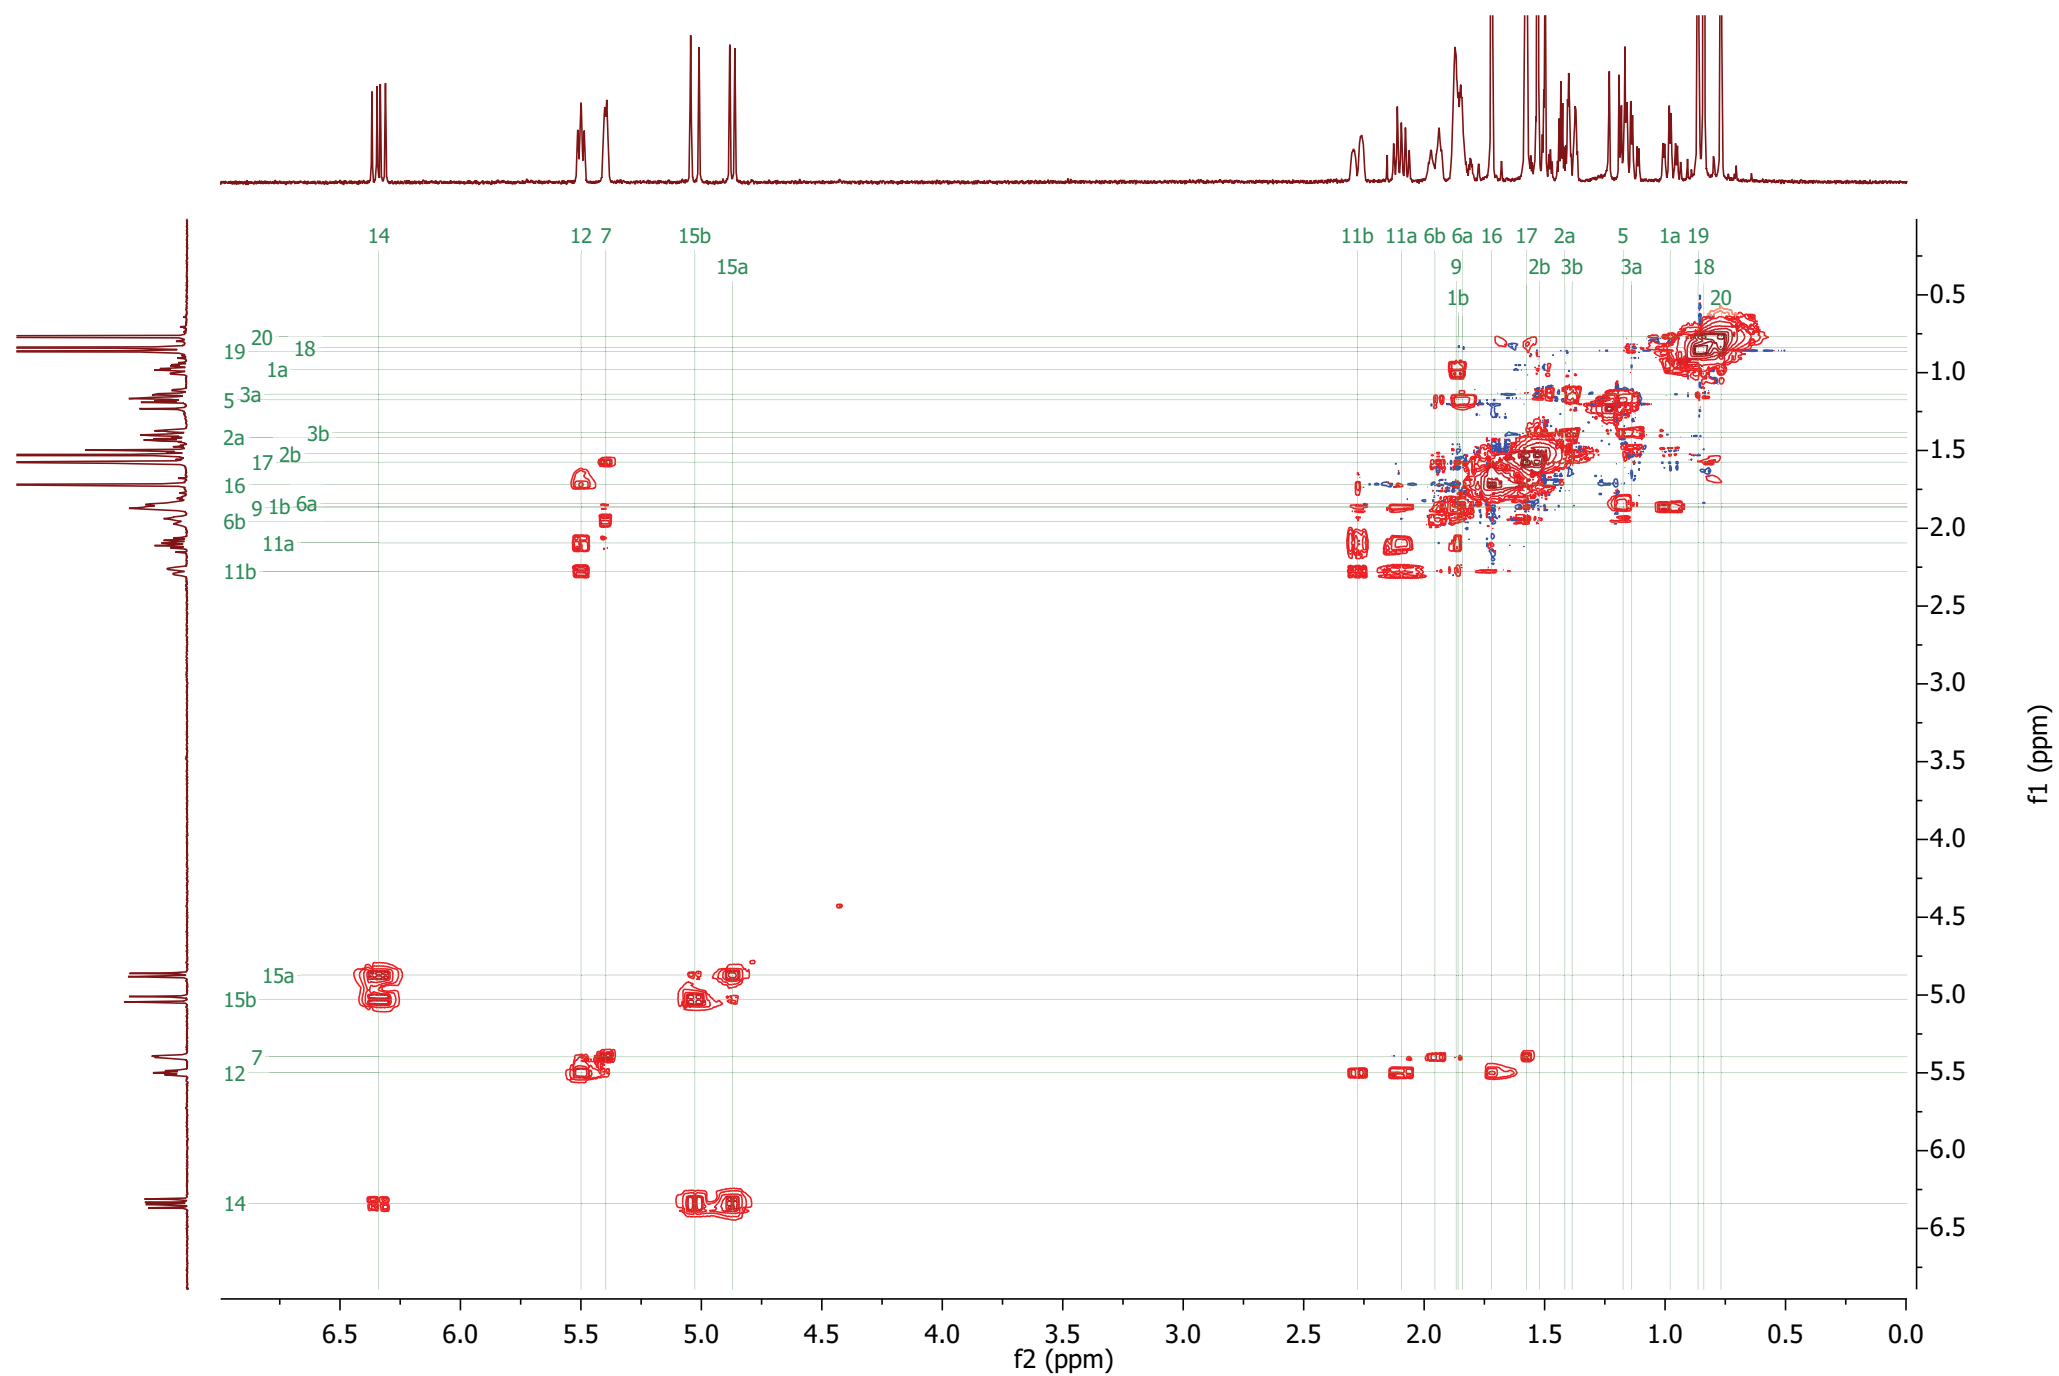

Figure S13-C.  $^1\text{H}$ - $^1\text{H}$  COSY of  $\lambda$ -7,12E,14-triene [24].

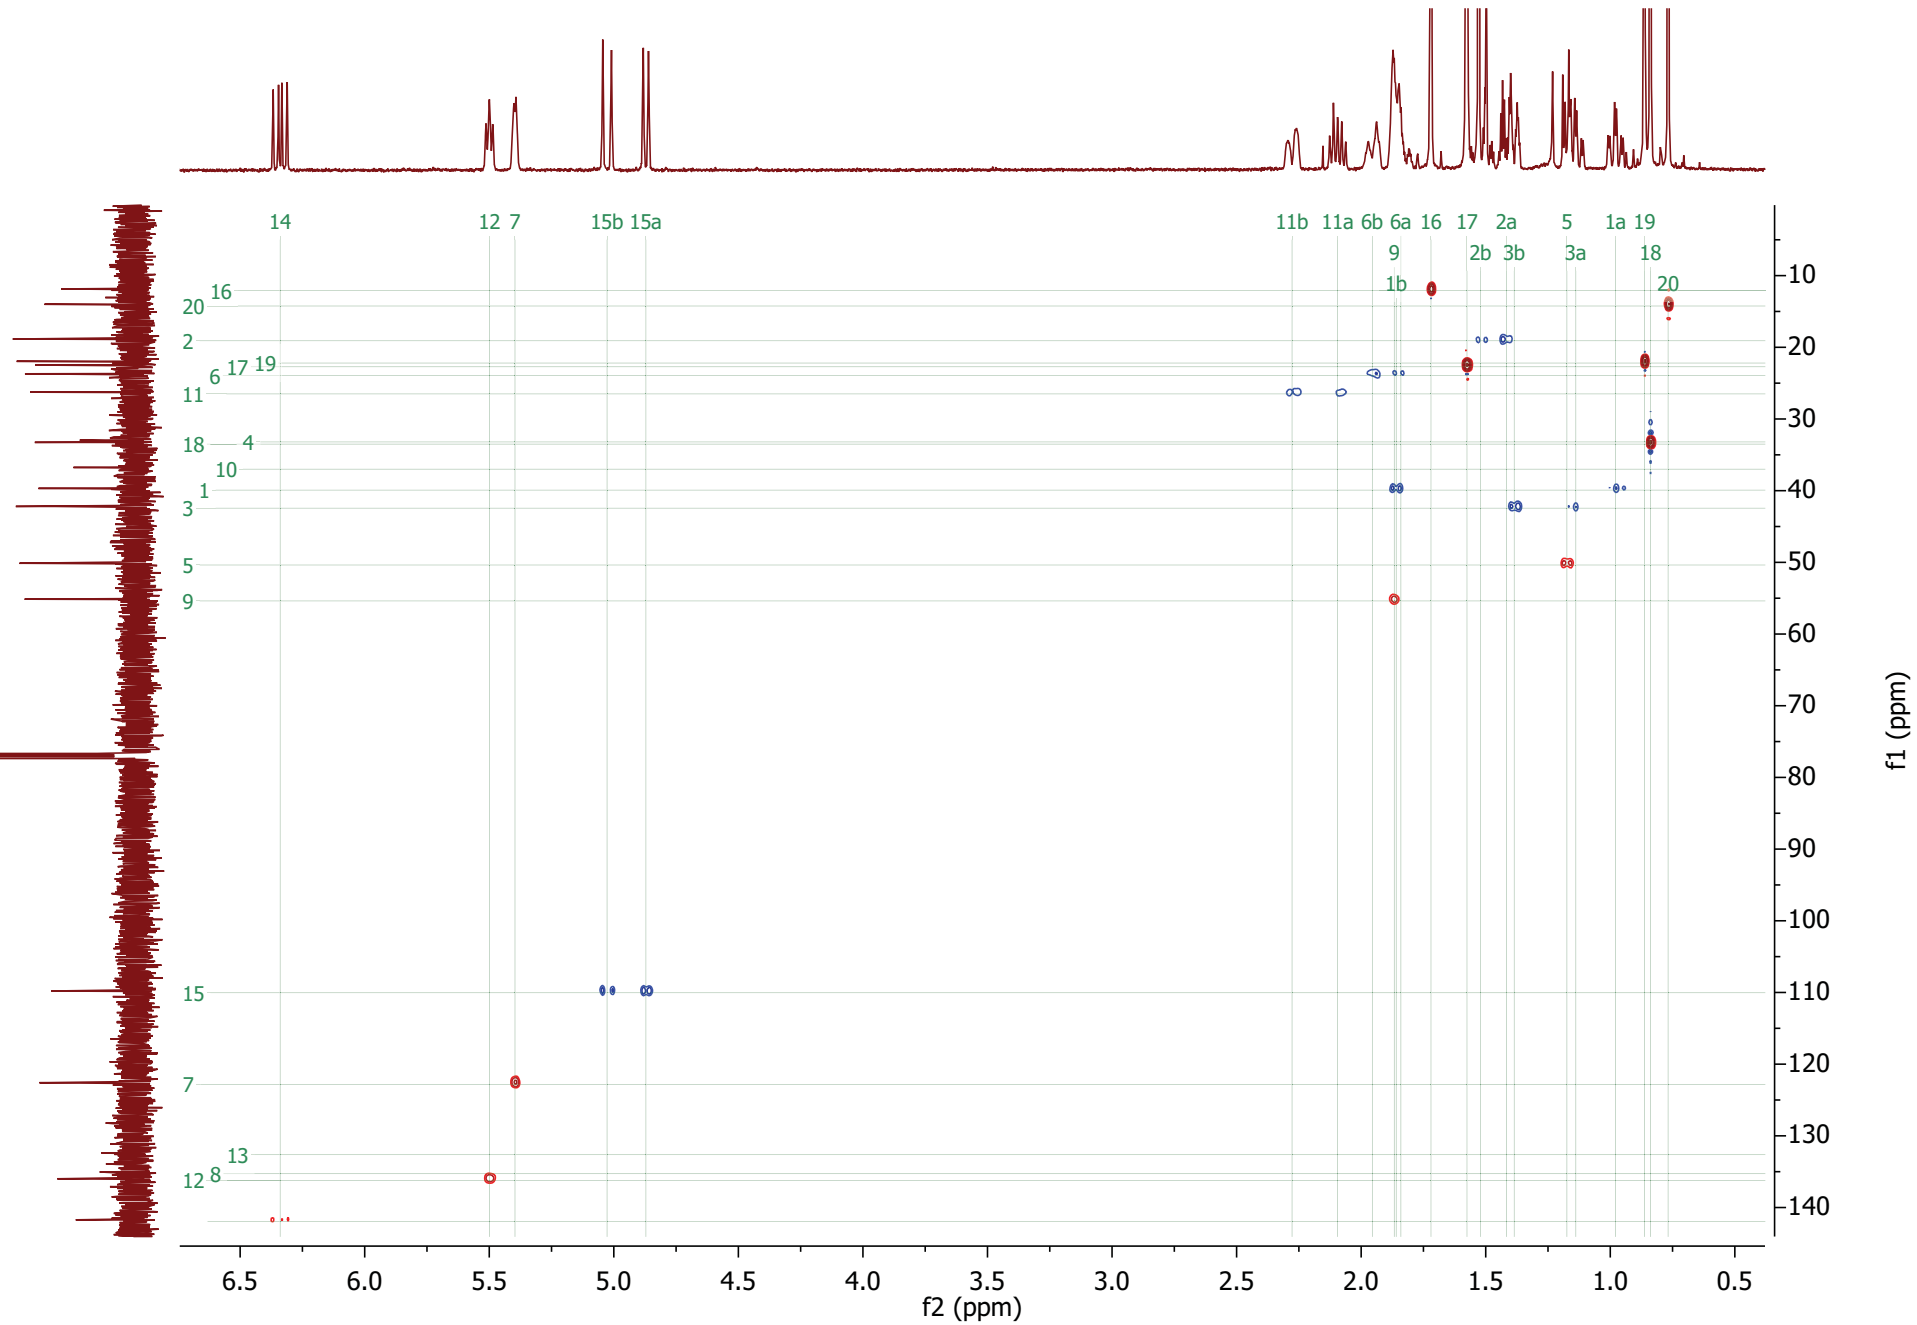

Figure S13-D.  $^1\text{H}$ - $^{13}\text{C}$  HSQC of lambda-7,12E,14-triene [24].

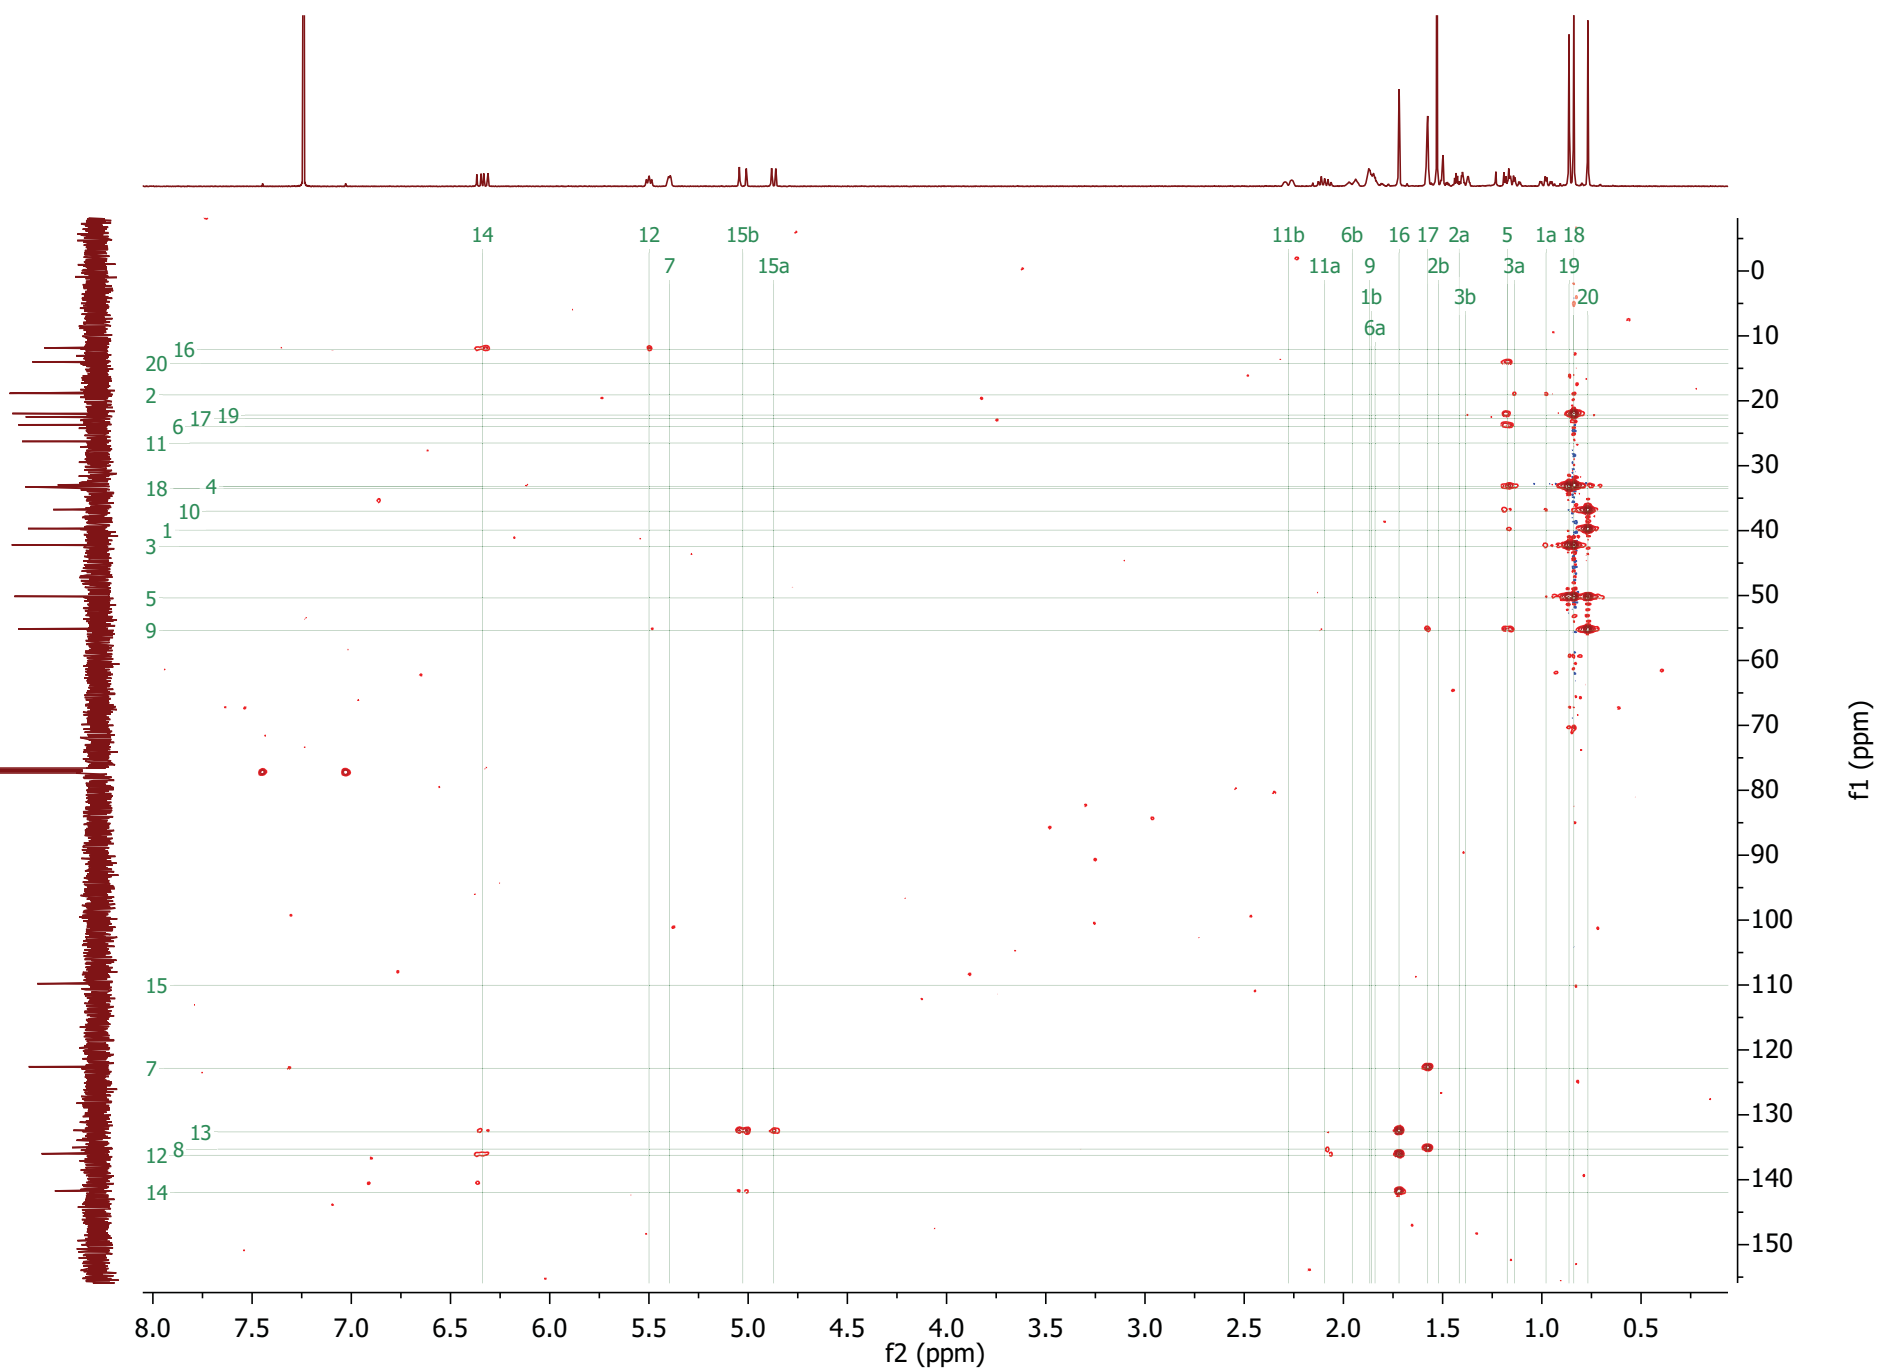

Figure S13-E.  $^1\text{H}$ - $^{13}\text{C}$  HMBC of lambda-7,12E,14-triene [24].

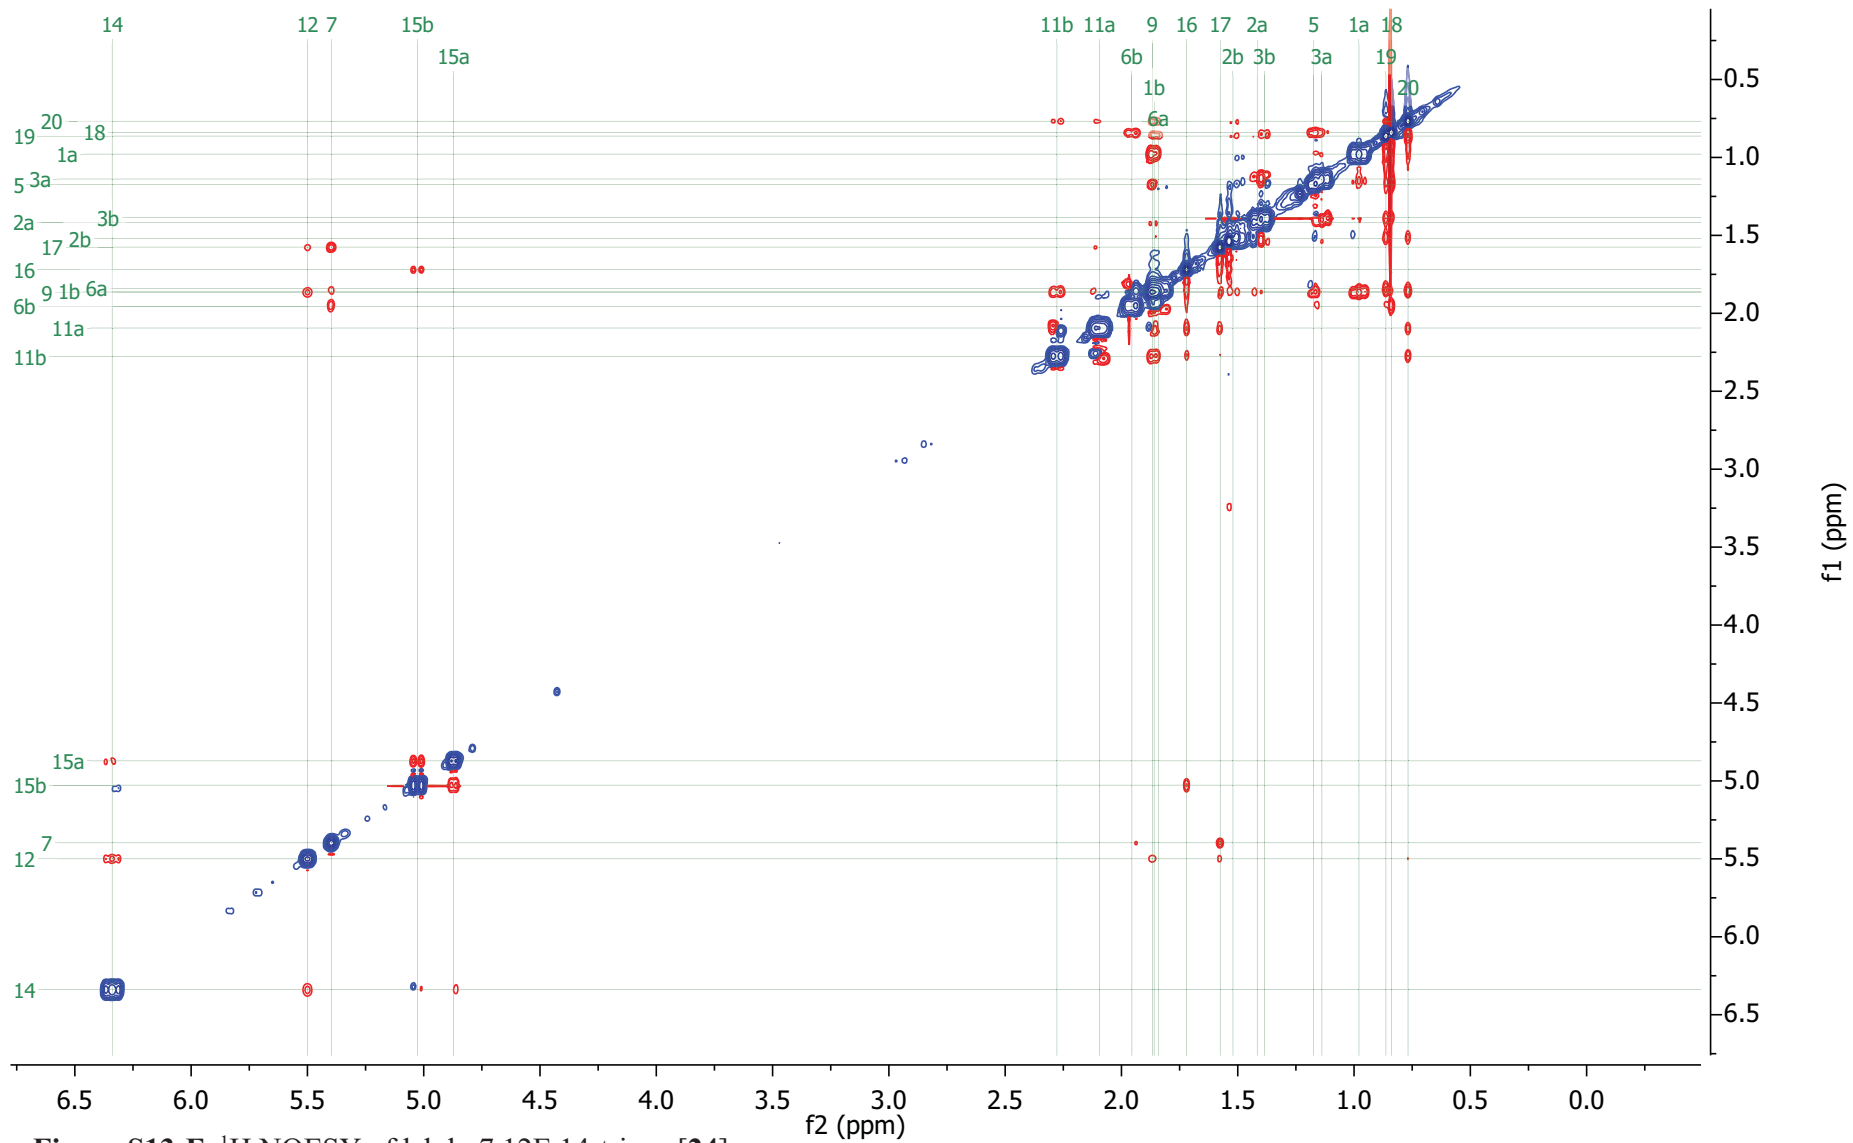

Figure S13-F. <sup>1</sup>H NOESY of labda-7,12E,14-triene [24].

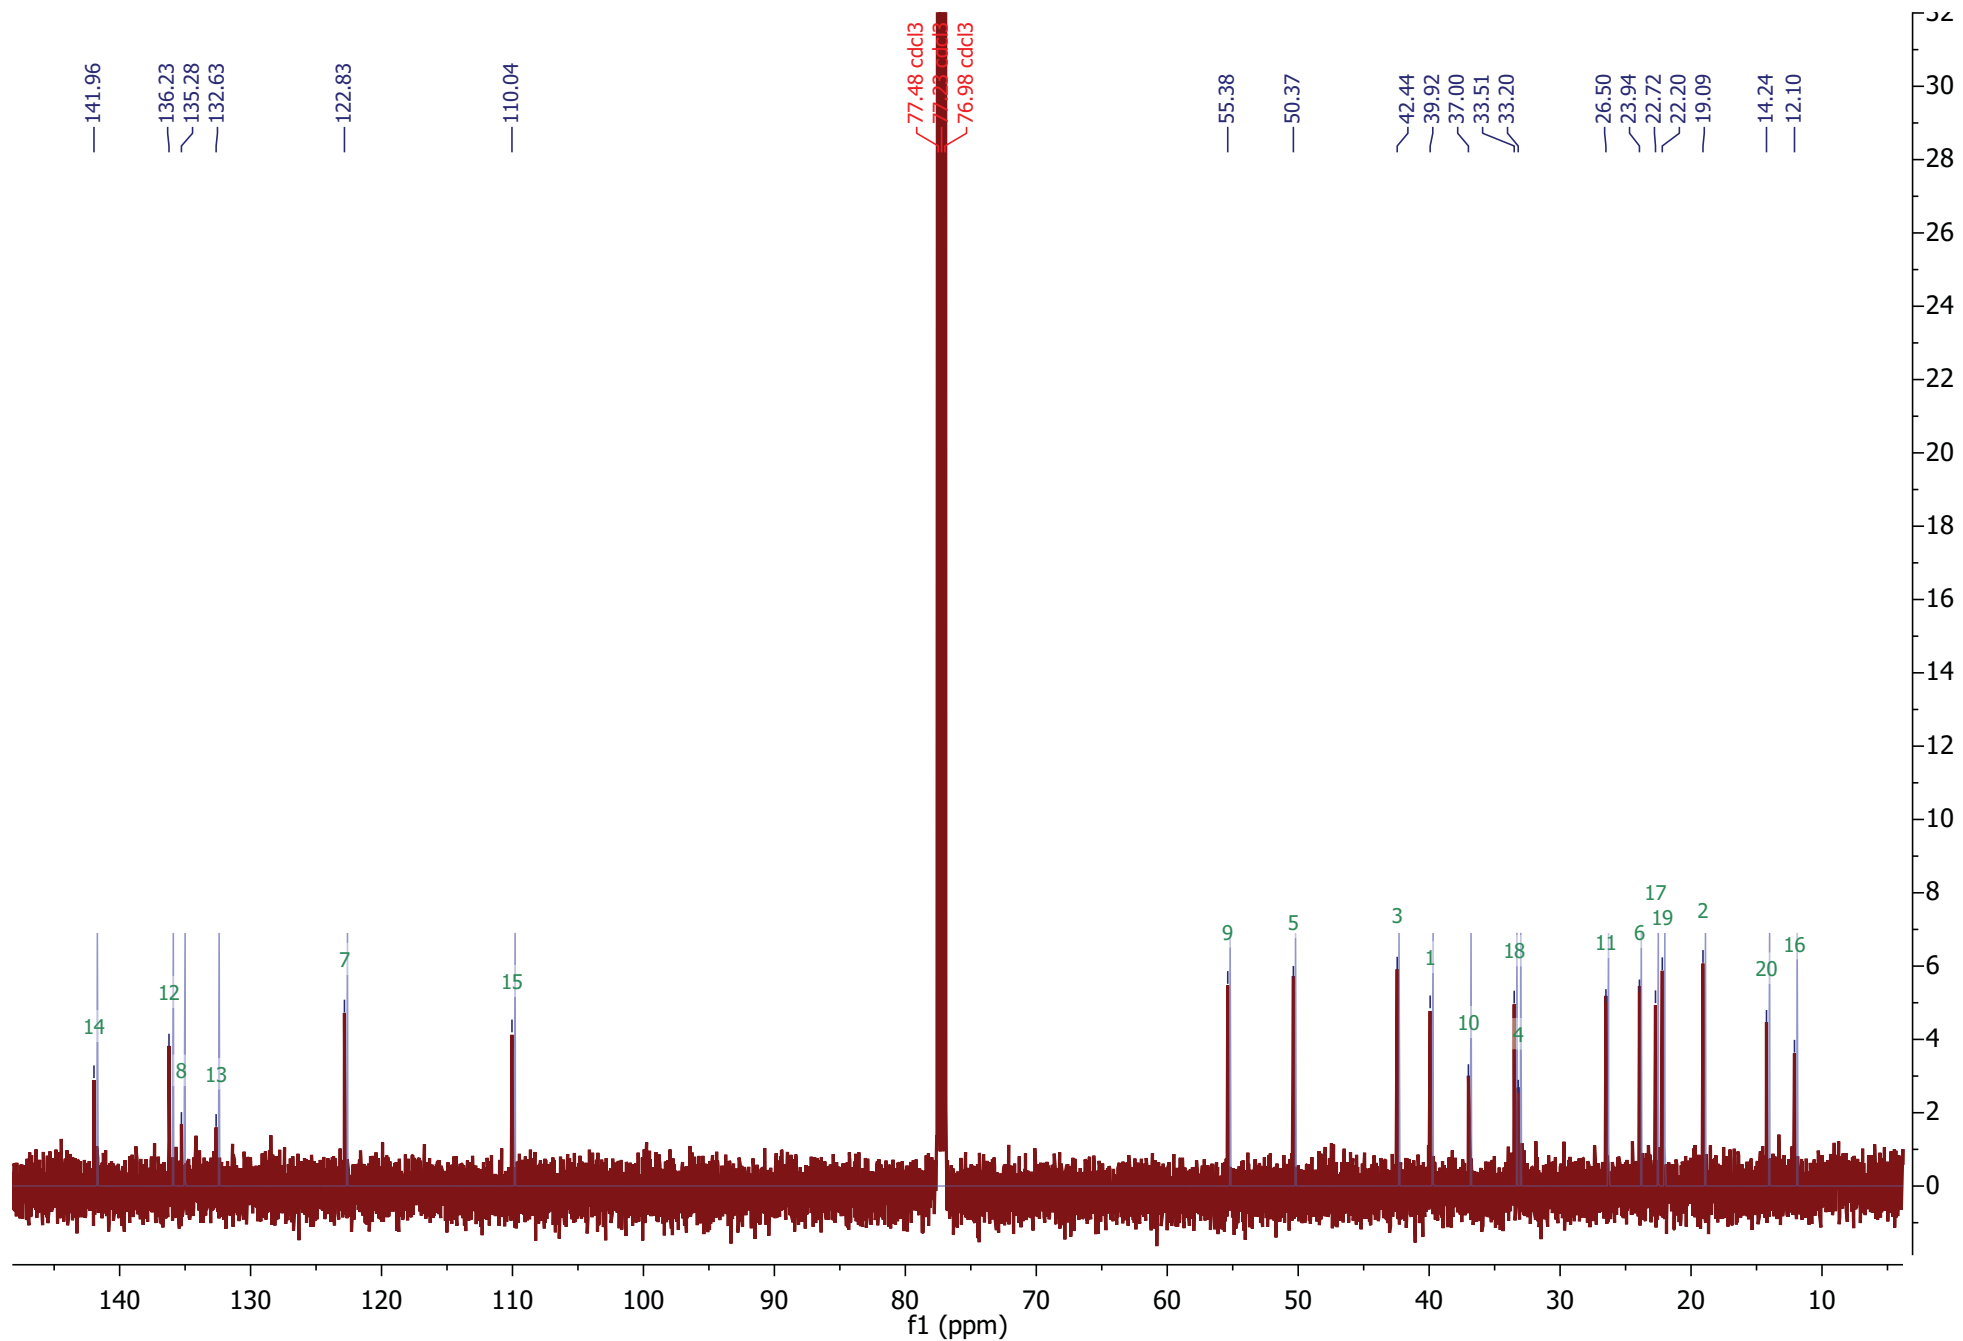

**Figure S13-G.** Overlay of  $^{13}\text{C}$  NMR of  $\lambda$ -7,12E,14-triene [24] (red) with  $^{13}\text{C}$  NMR spectrum (blue) reconstructed from shifts reported for the same compound by Roengsumran et al. (1999) (DOI: 10.1016/S0031-9422(98)00604-9).

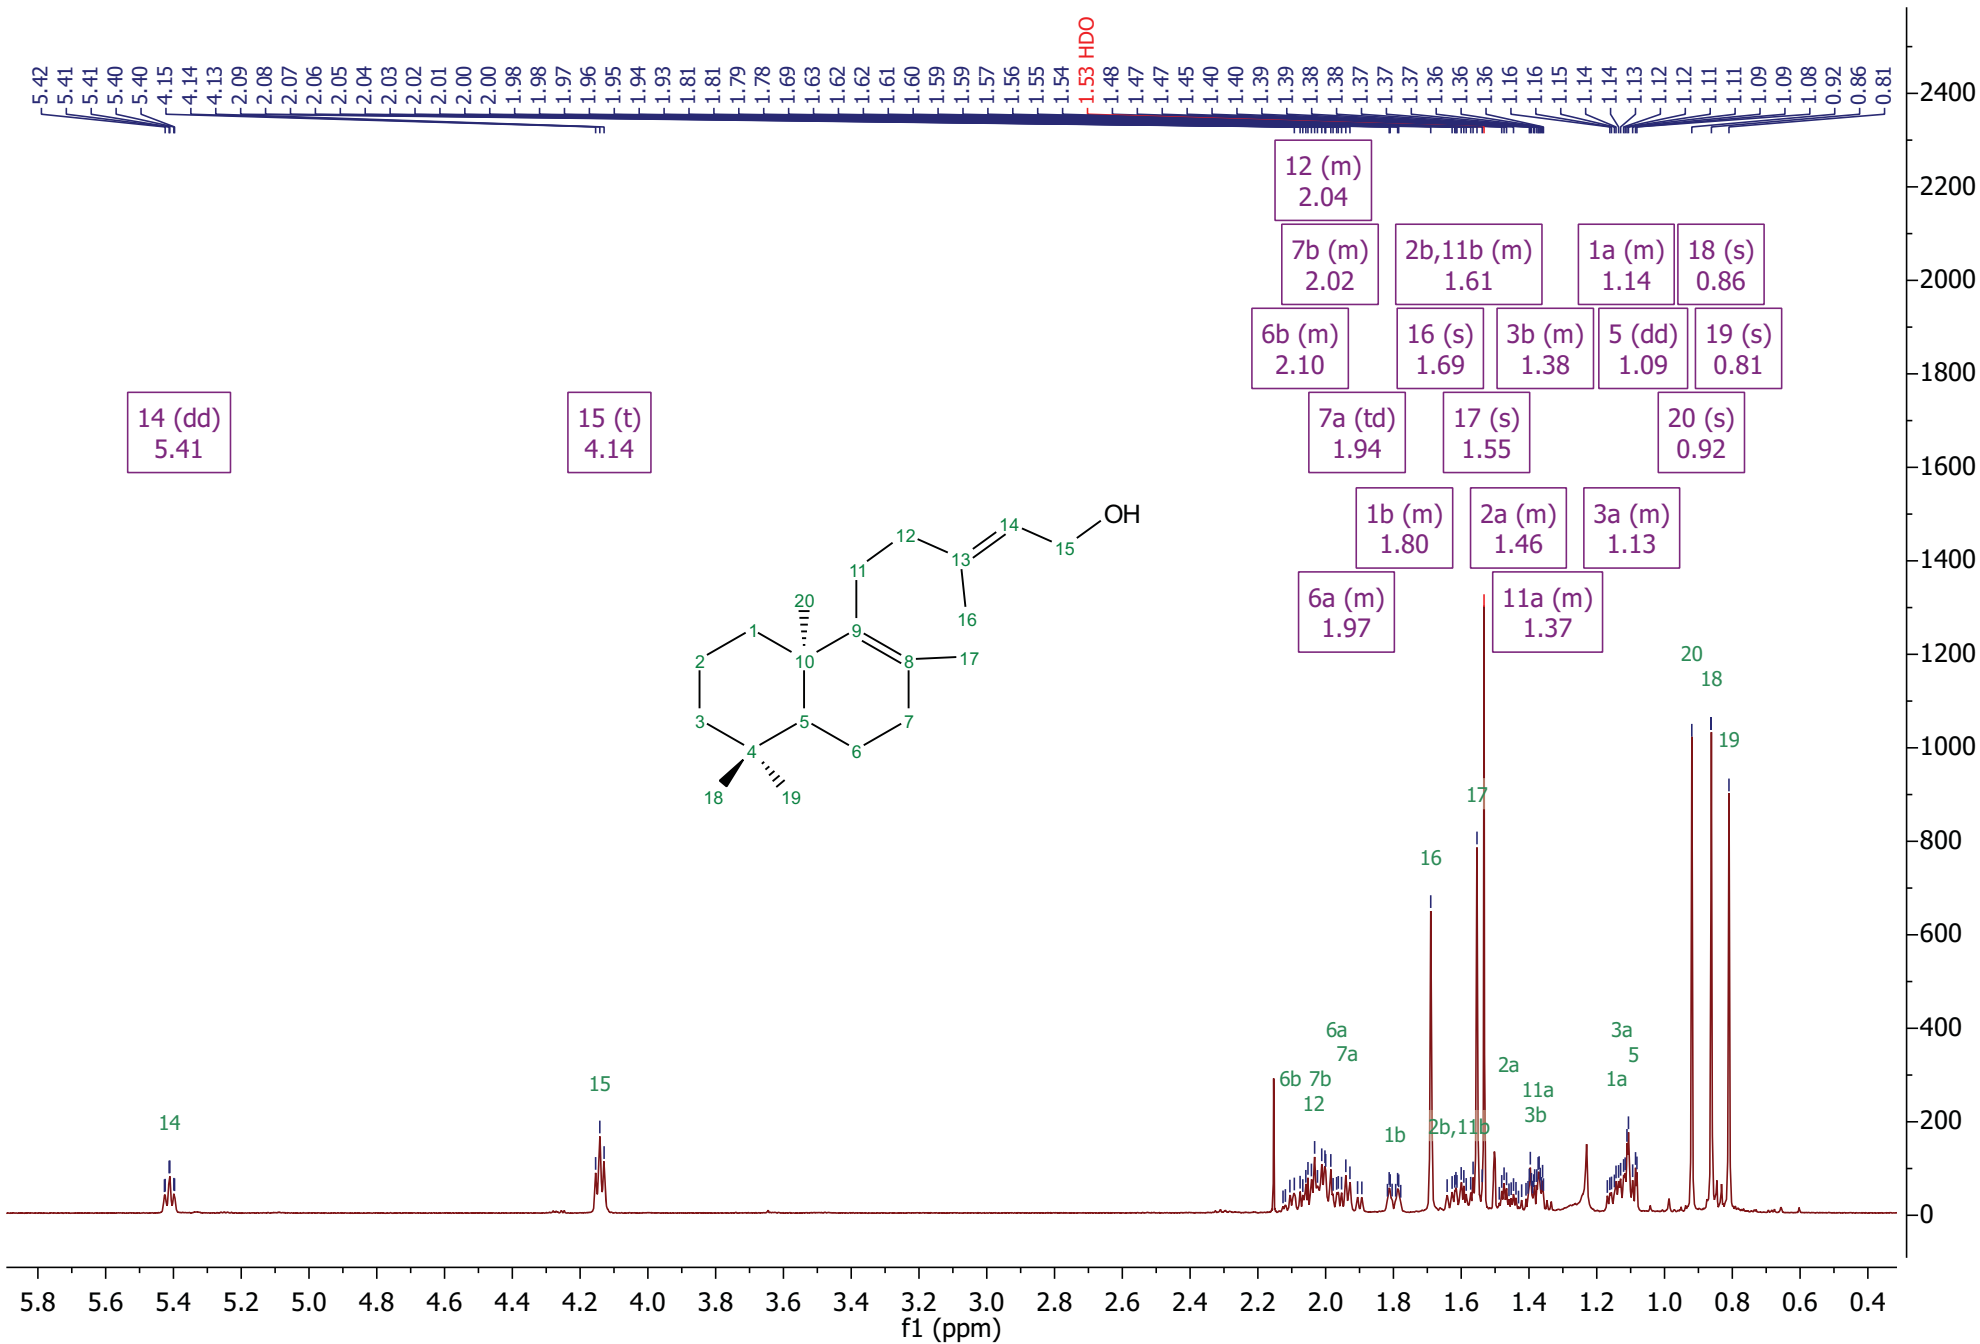

**Figure S14-A.**  $^1\text{H}$  NMR of (10R)-labda-8,13E-diene-15-ol [25a].

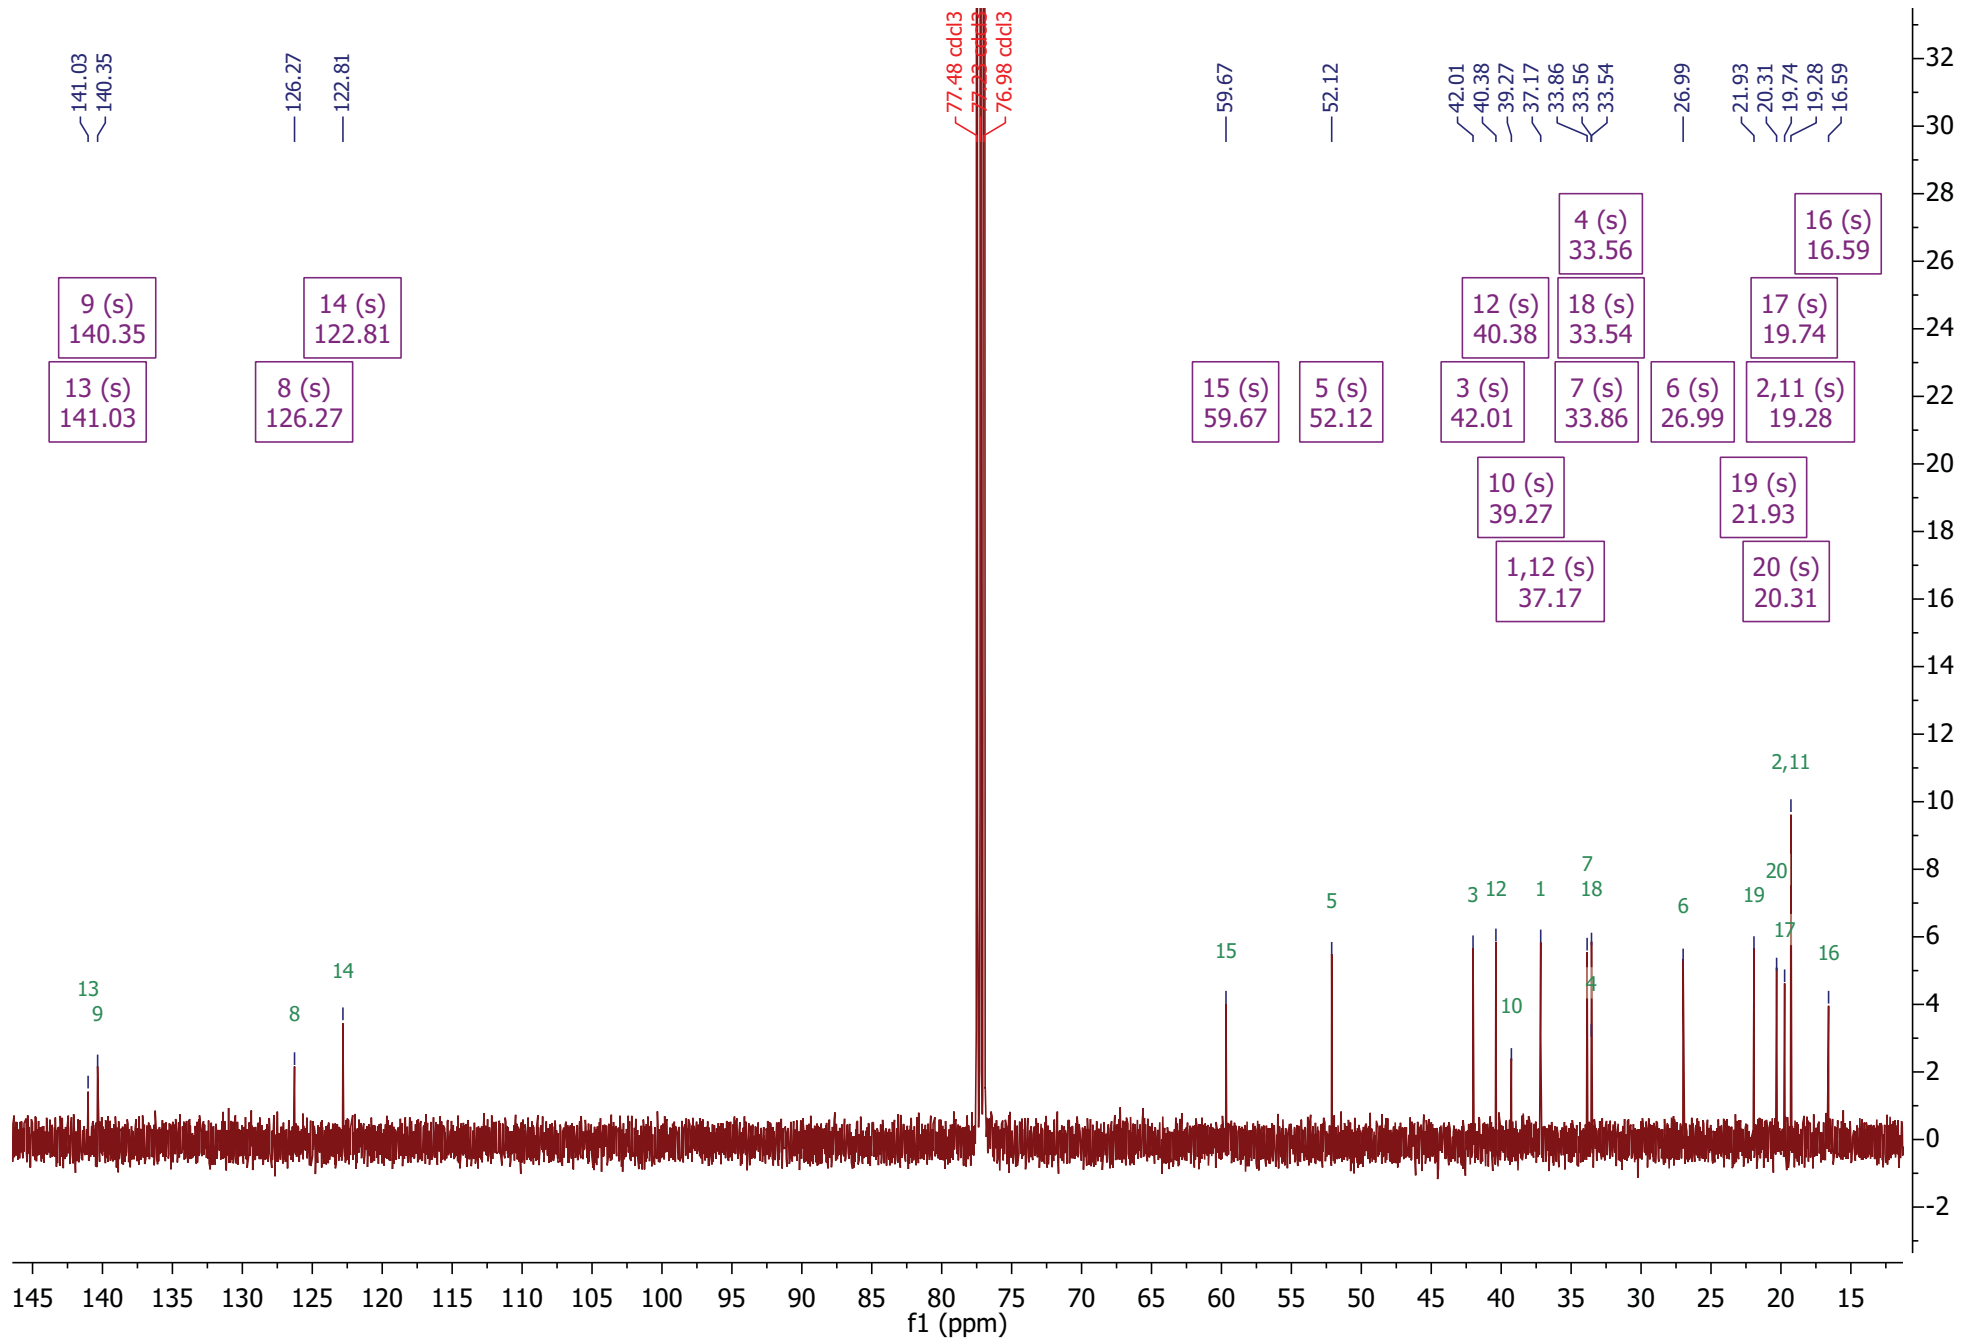

Figure S14-B. <sup>13</sup>C NMR of (10R)-labda-8,13E-diene-15-ol [25a].



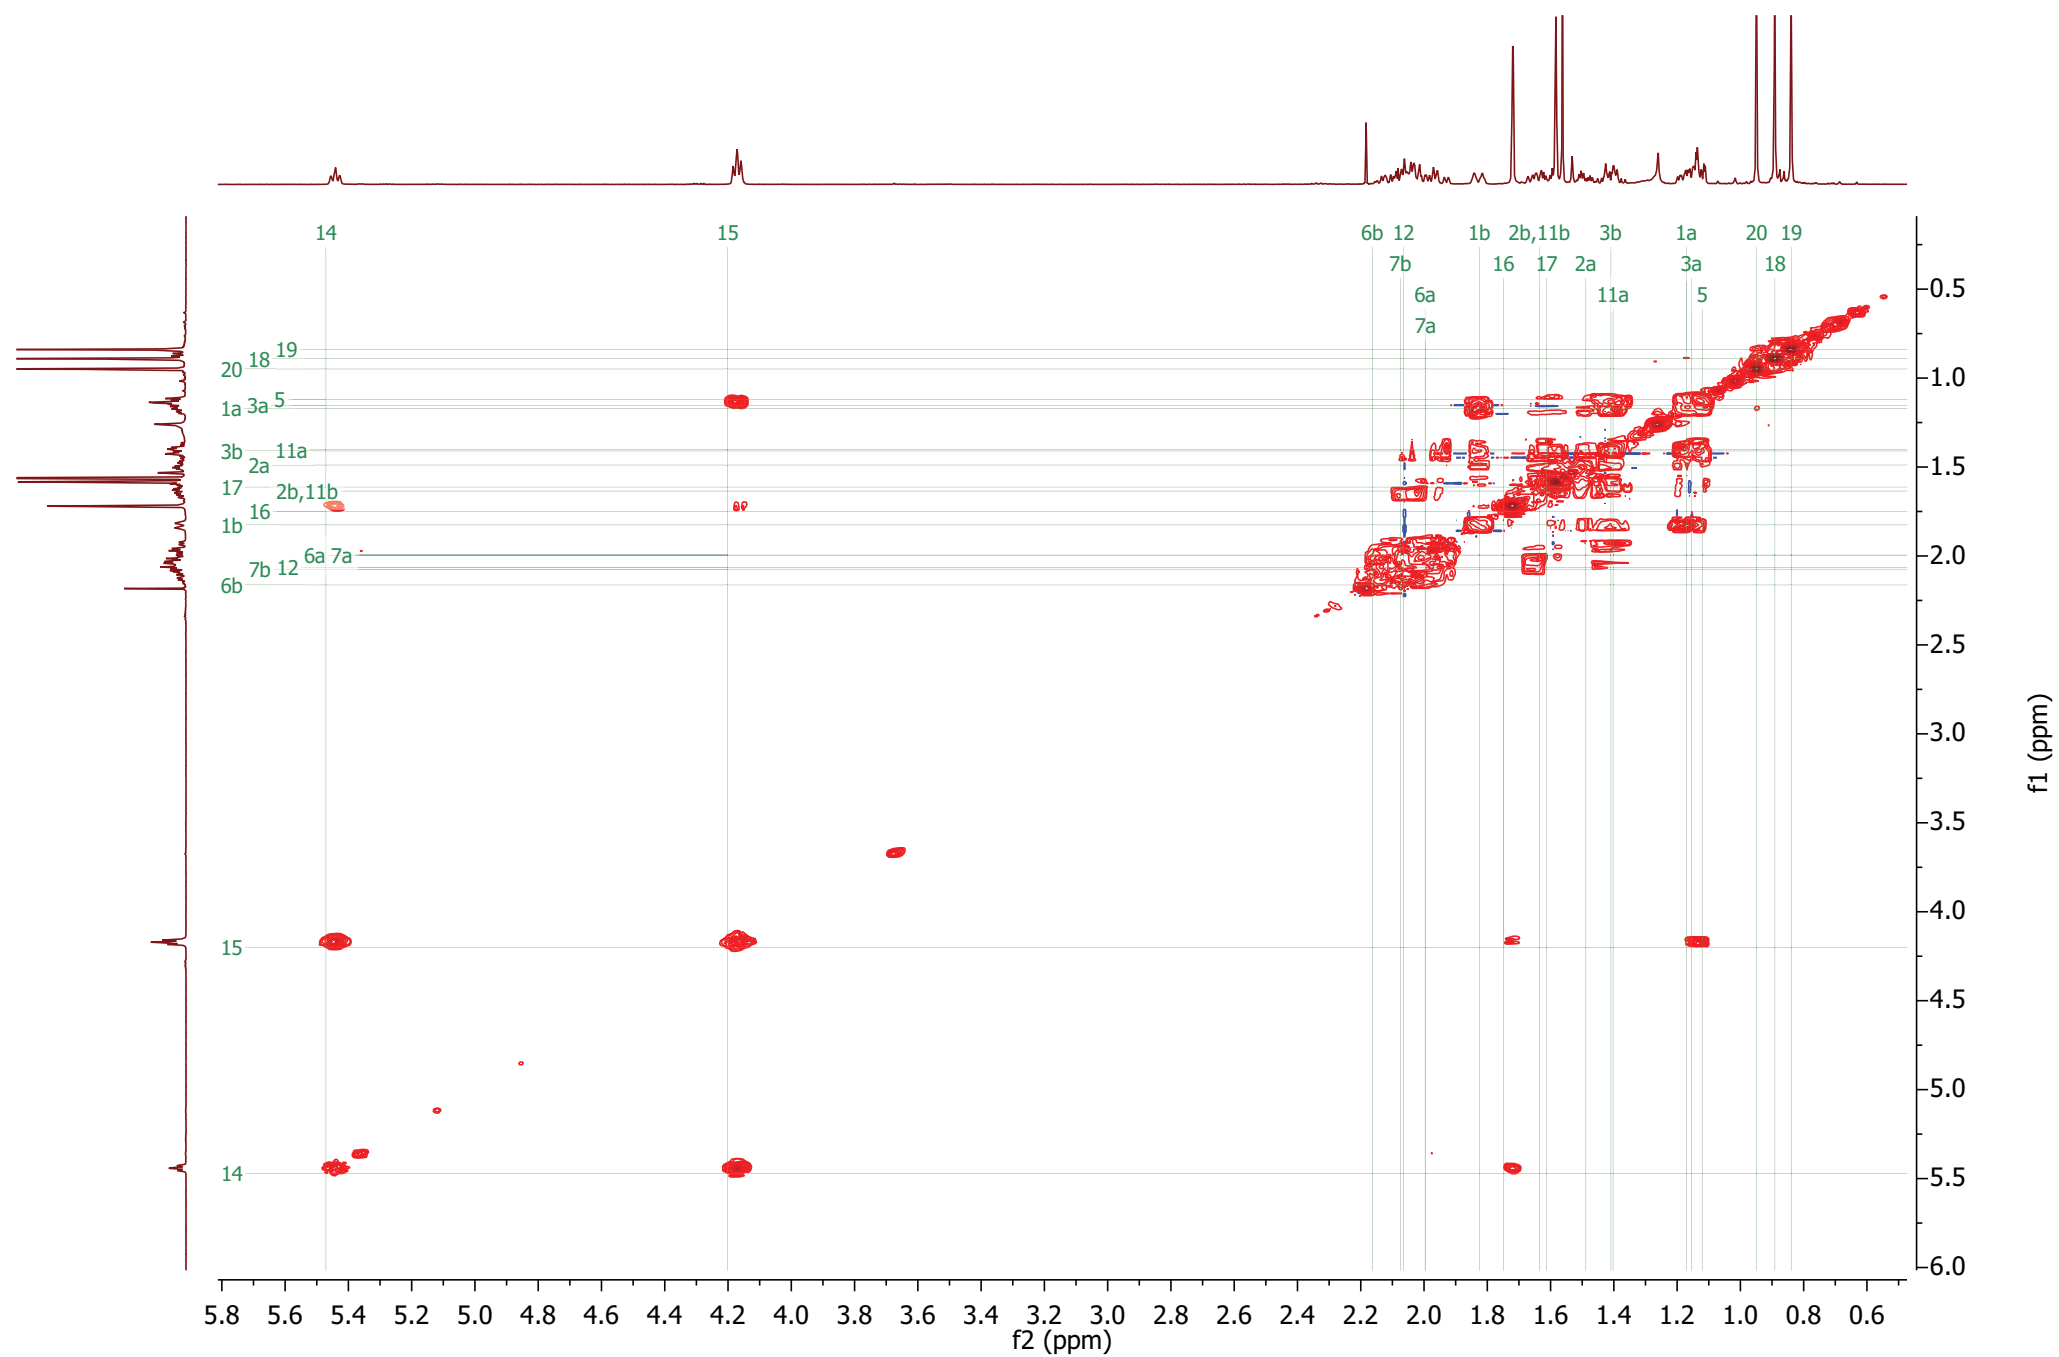

Figure S14-C.  $^1\text{H}$ - $^1\text{H}$  COSY of (10R)-labda-8,13E-diene-15-ol [25a].

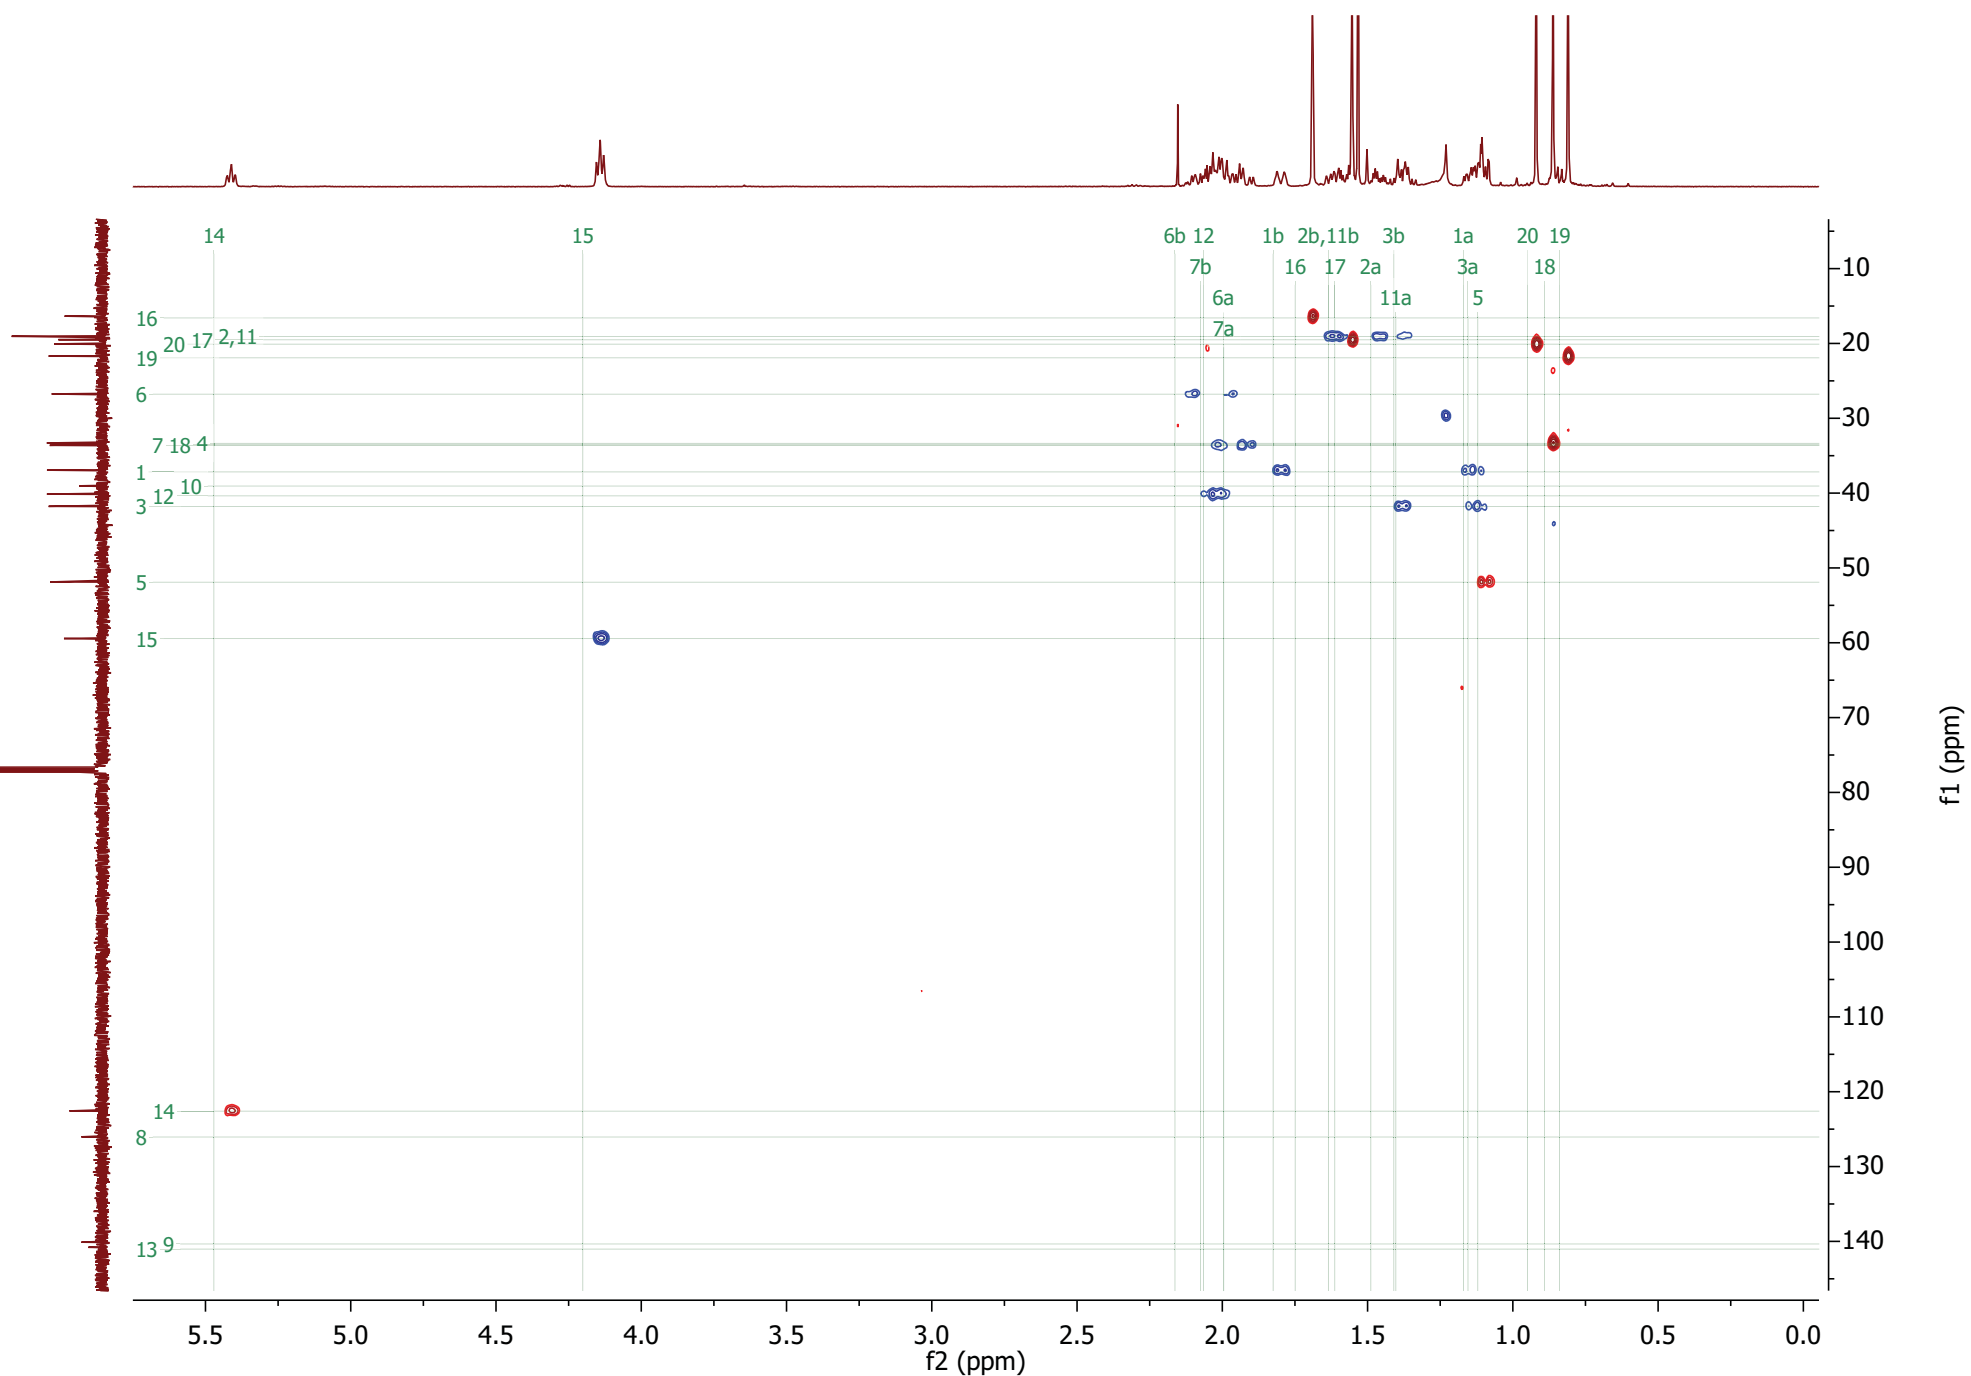

**Figure S14-D.**  $^1\text{H}$ - $^{13}\text{C}$  HSQC of (10R)-labda-8,13E-diene-15-ol [25a].

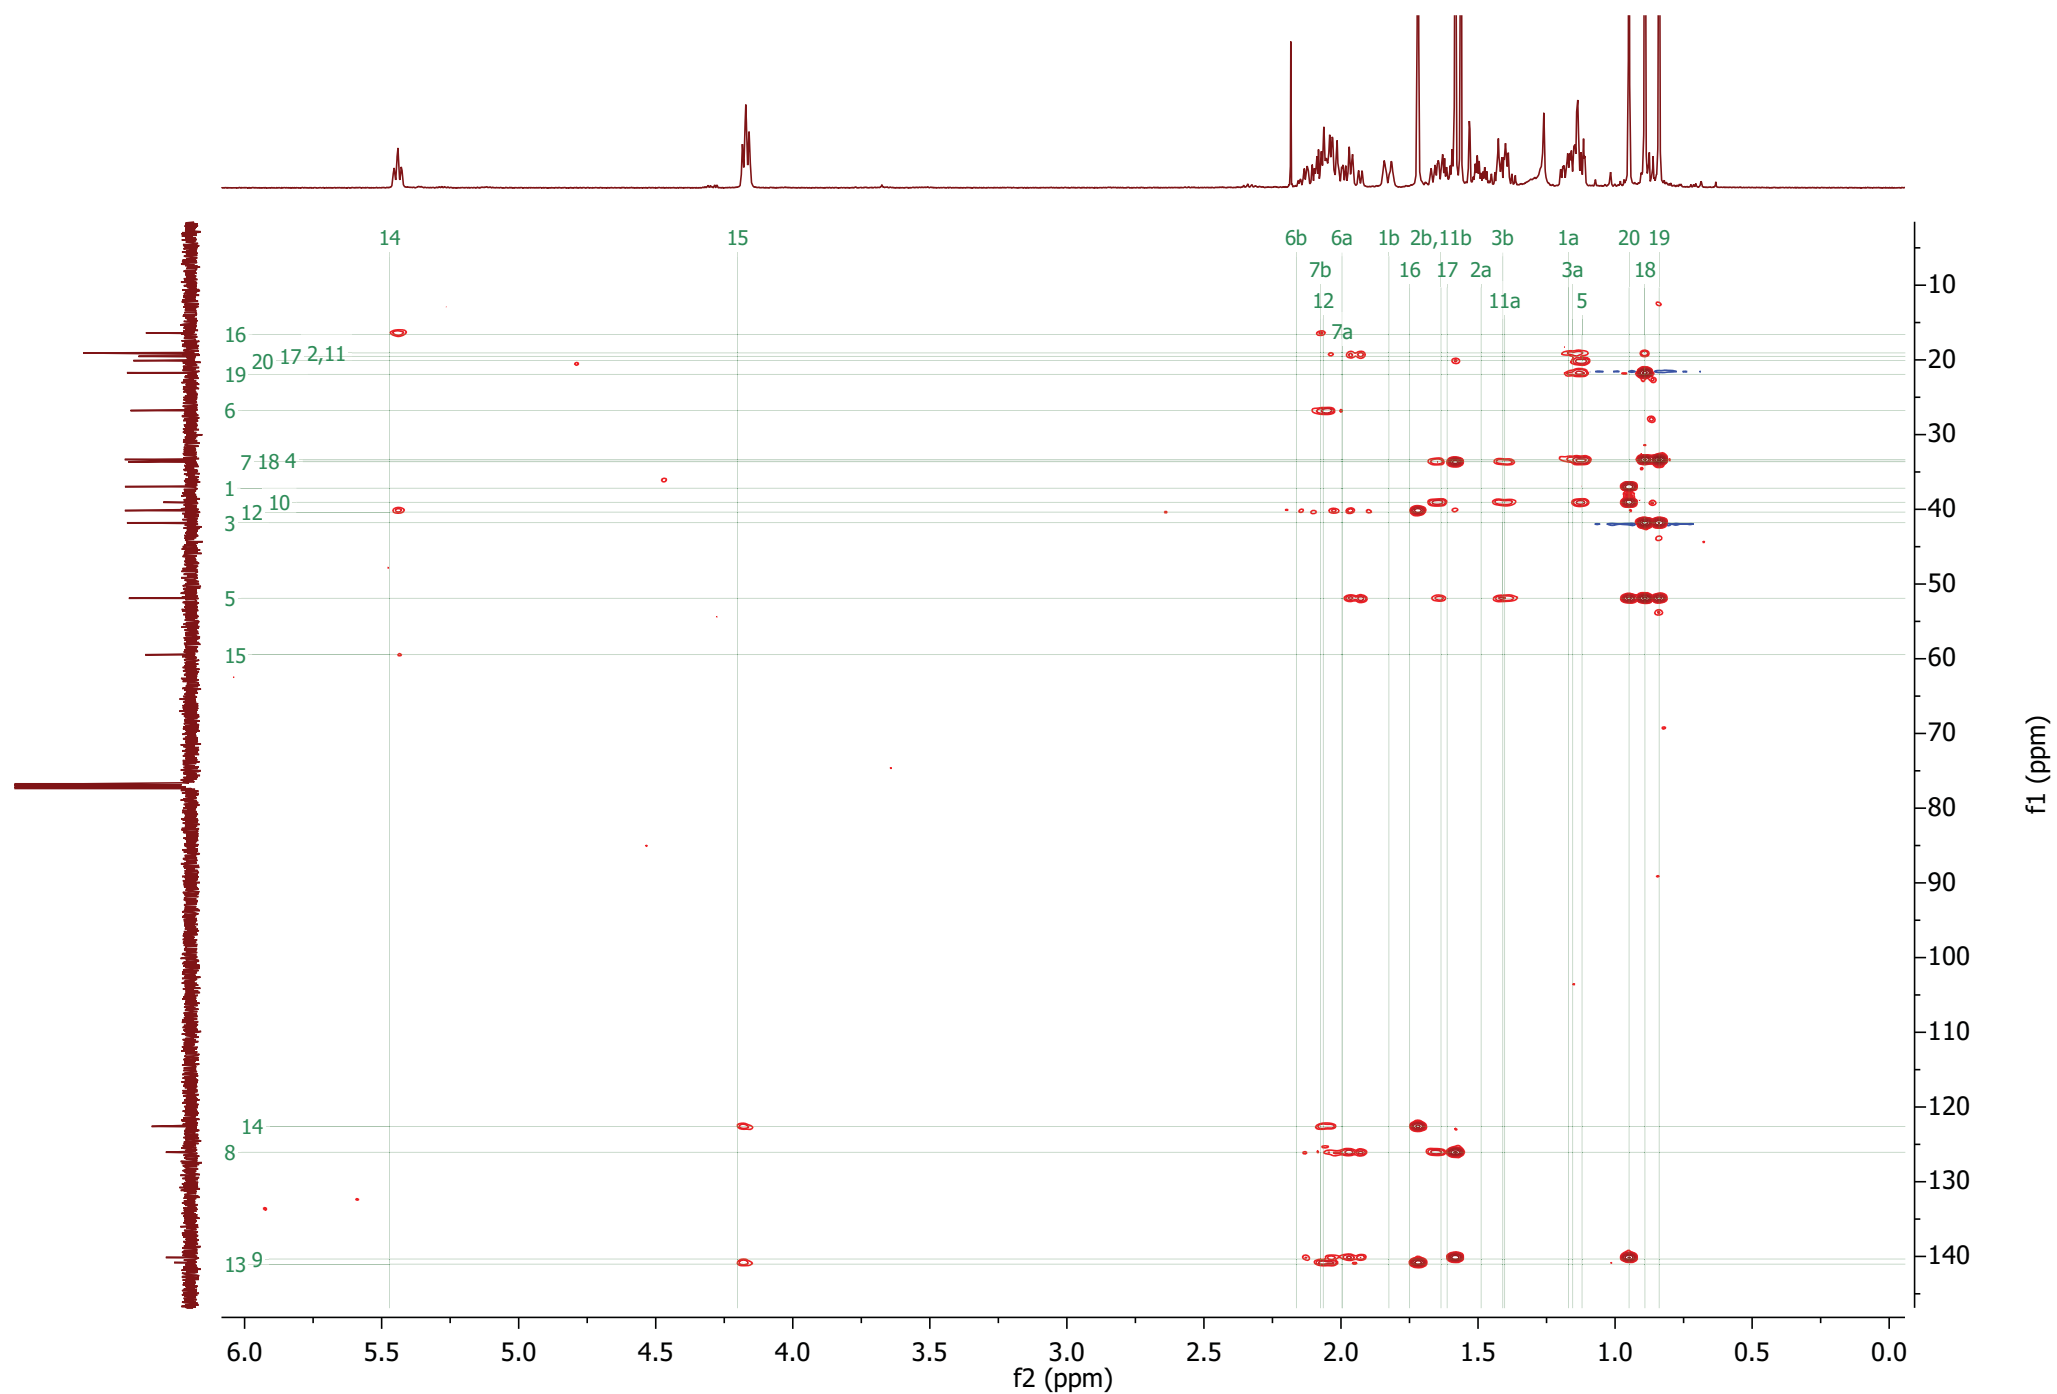

Figure S14-E.  $^1\text{H}$ - $^{13}\text{C}$  HMBC of (10R)-labda-8,13E-diene-15-ol [**25a**].

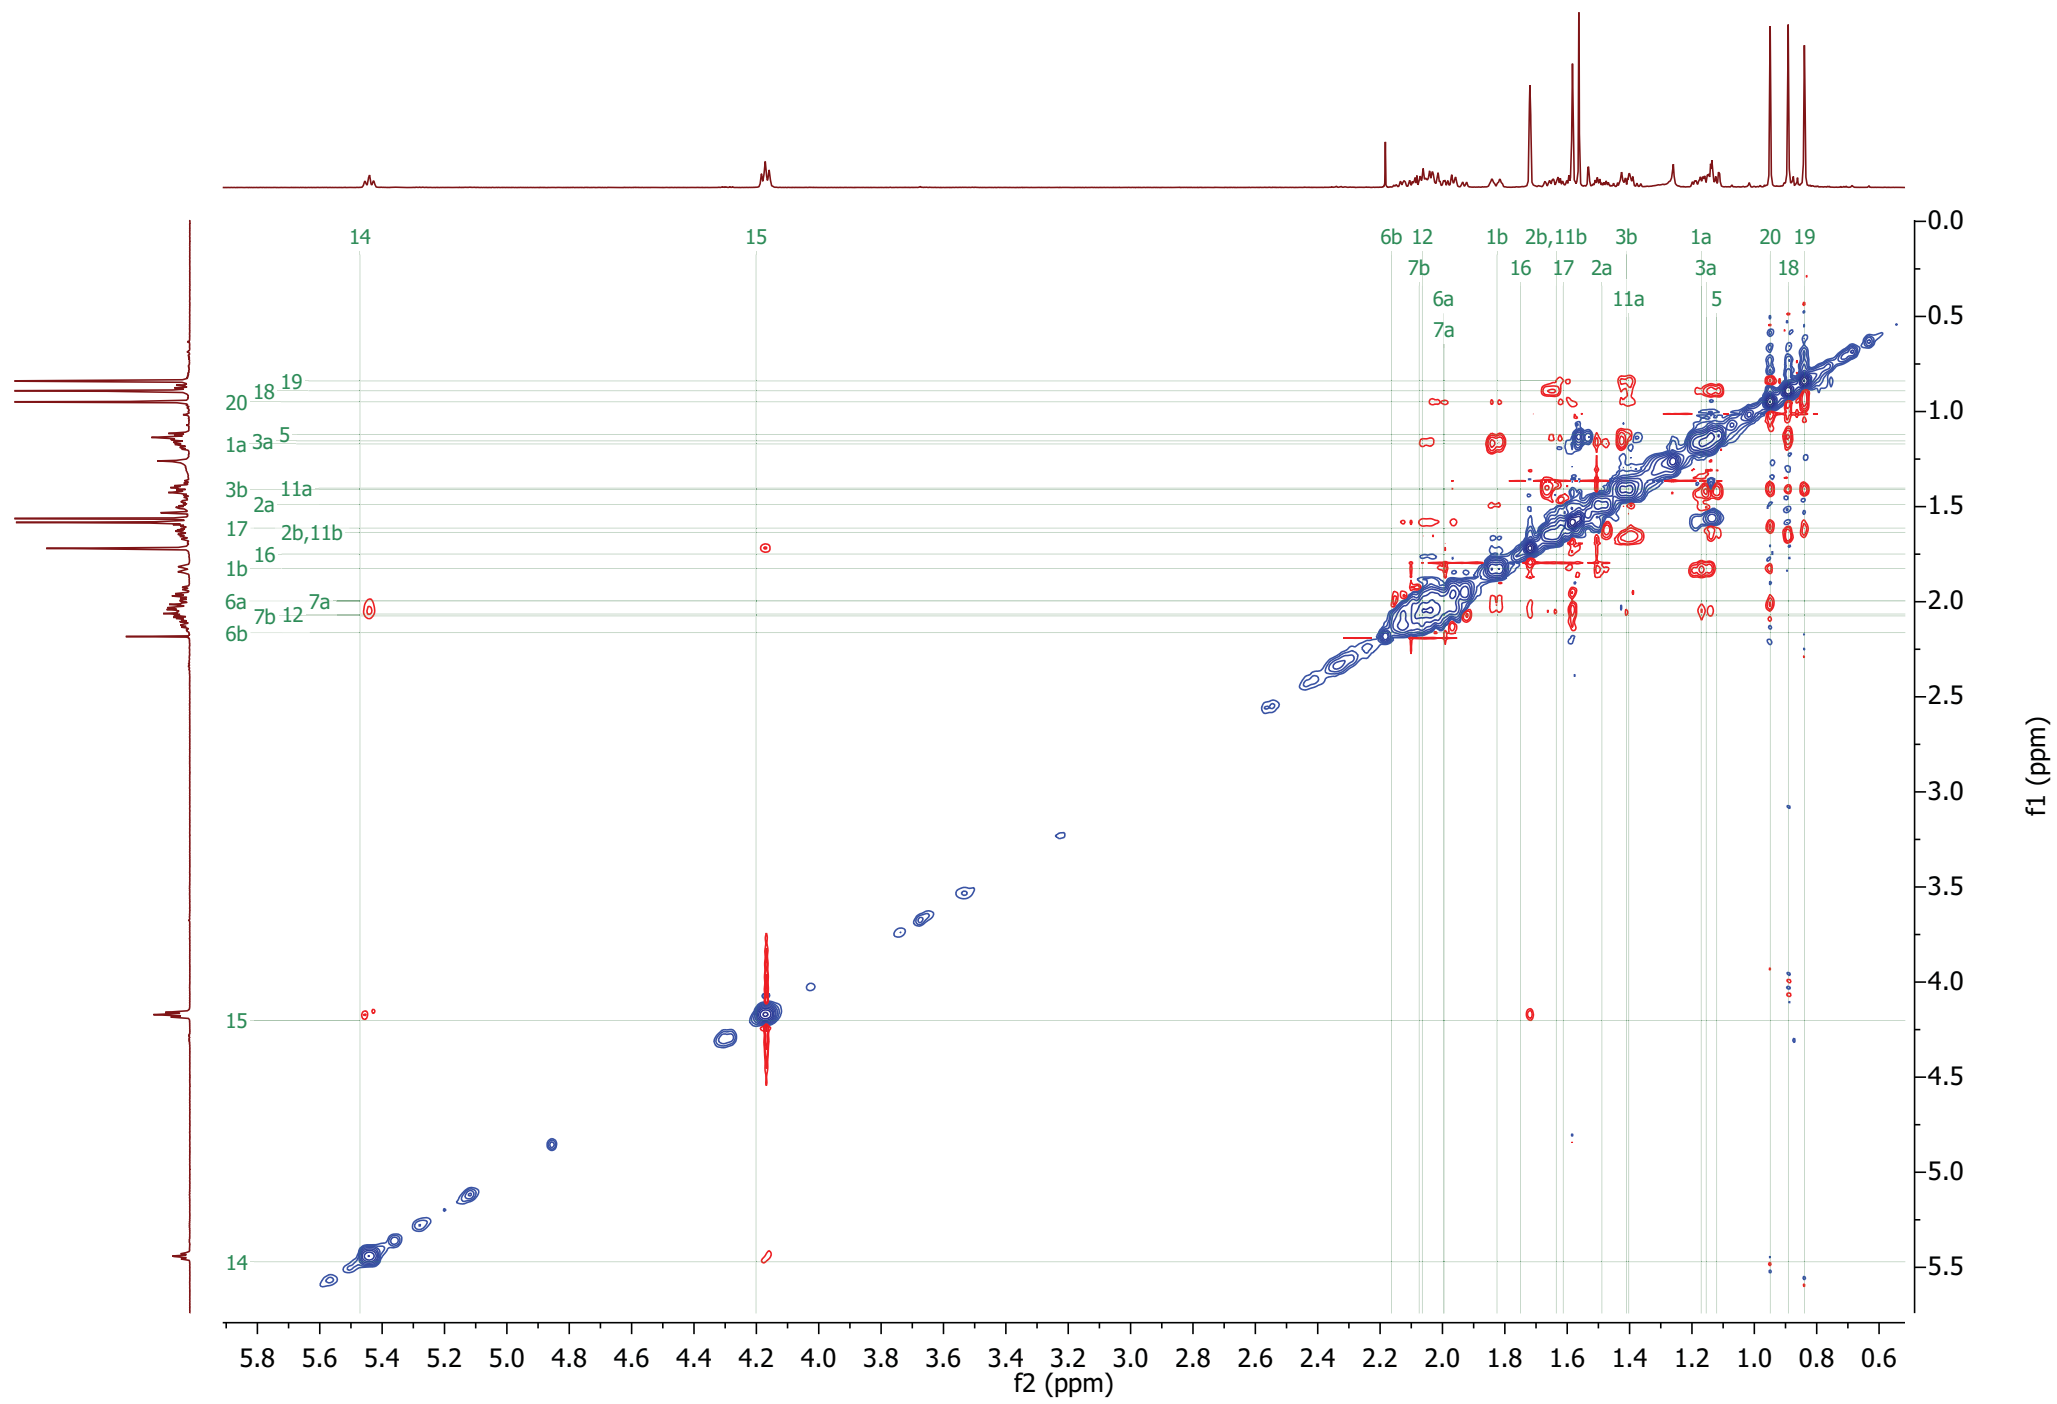

Figure S14-F.  $^1\text{H}$  NOESY of (10R)-labda-8,13E-diene-15-ol [25a].

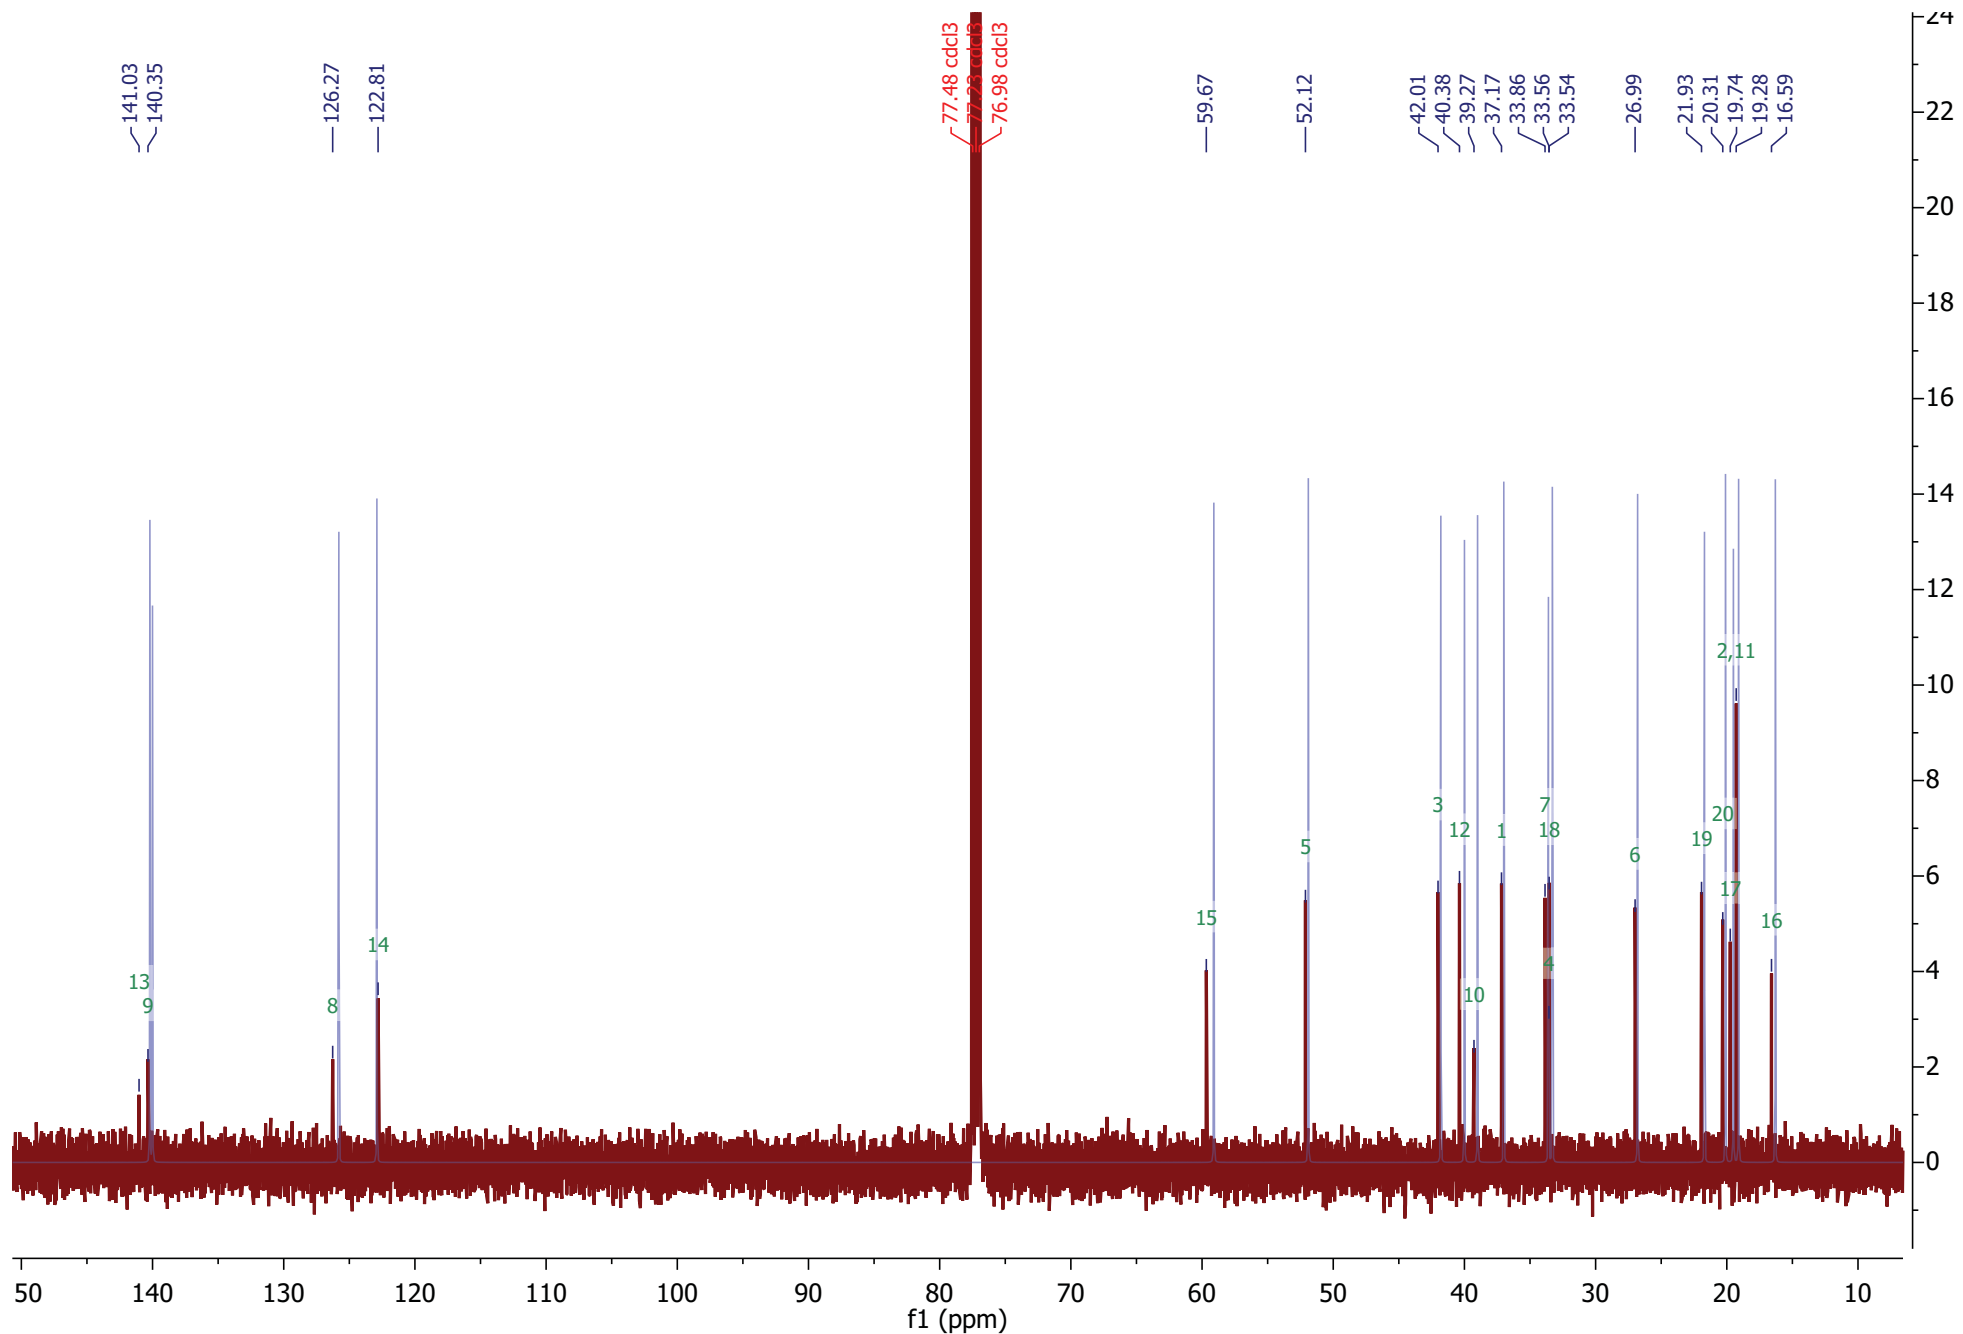

**Figure S14-G.** Overlay of <sup>13</sup>C NMR of (10R)-labda-8,13E-diene-15-ol [**25a**] (red) with <sup>13</sup>C NMR spectrum (blue) reconstructed from shifts reported for the same compound by Suzuki et al. (1983) (DOI: 10.1016/0031-9422(83)80249-0).

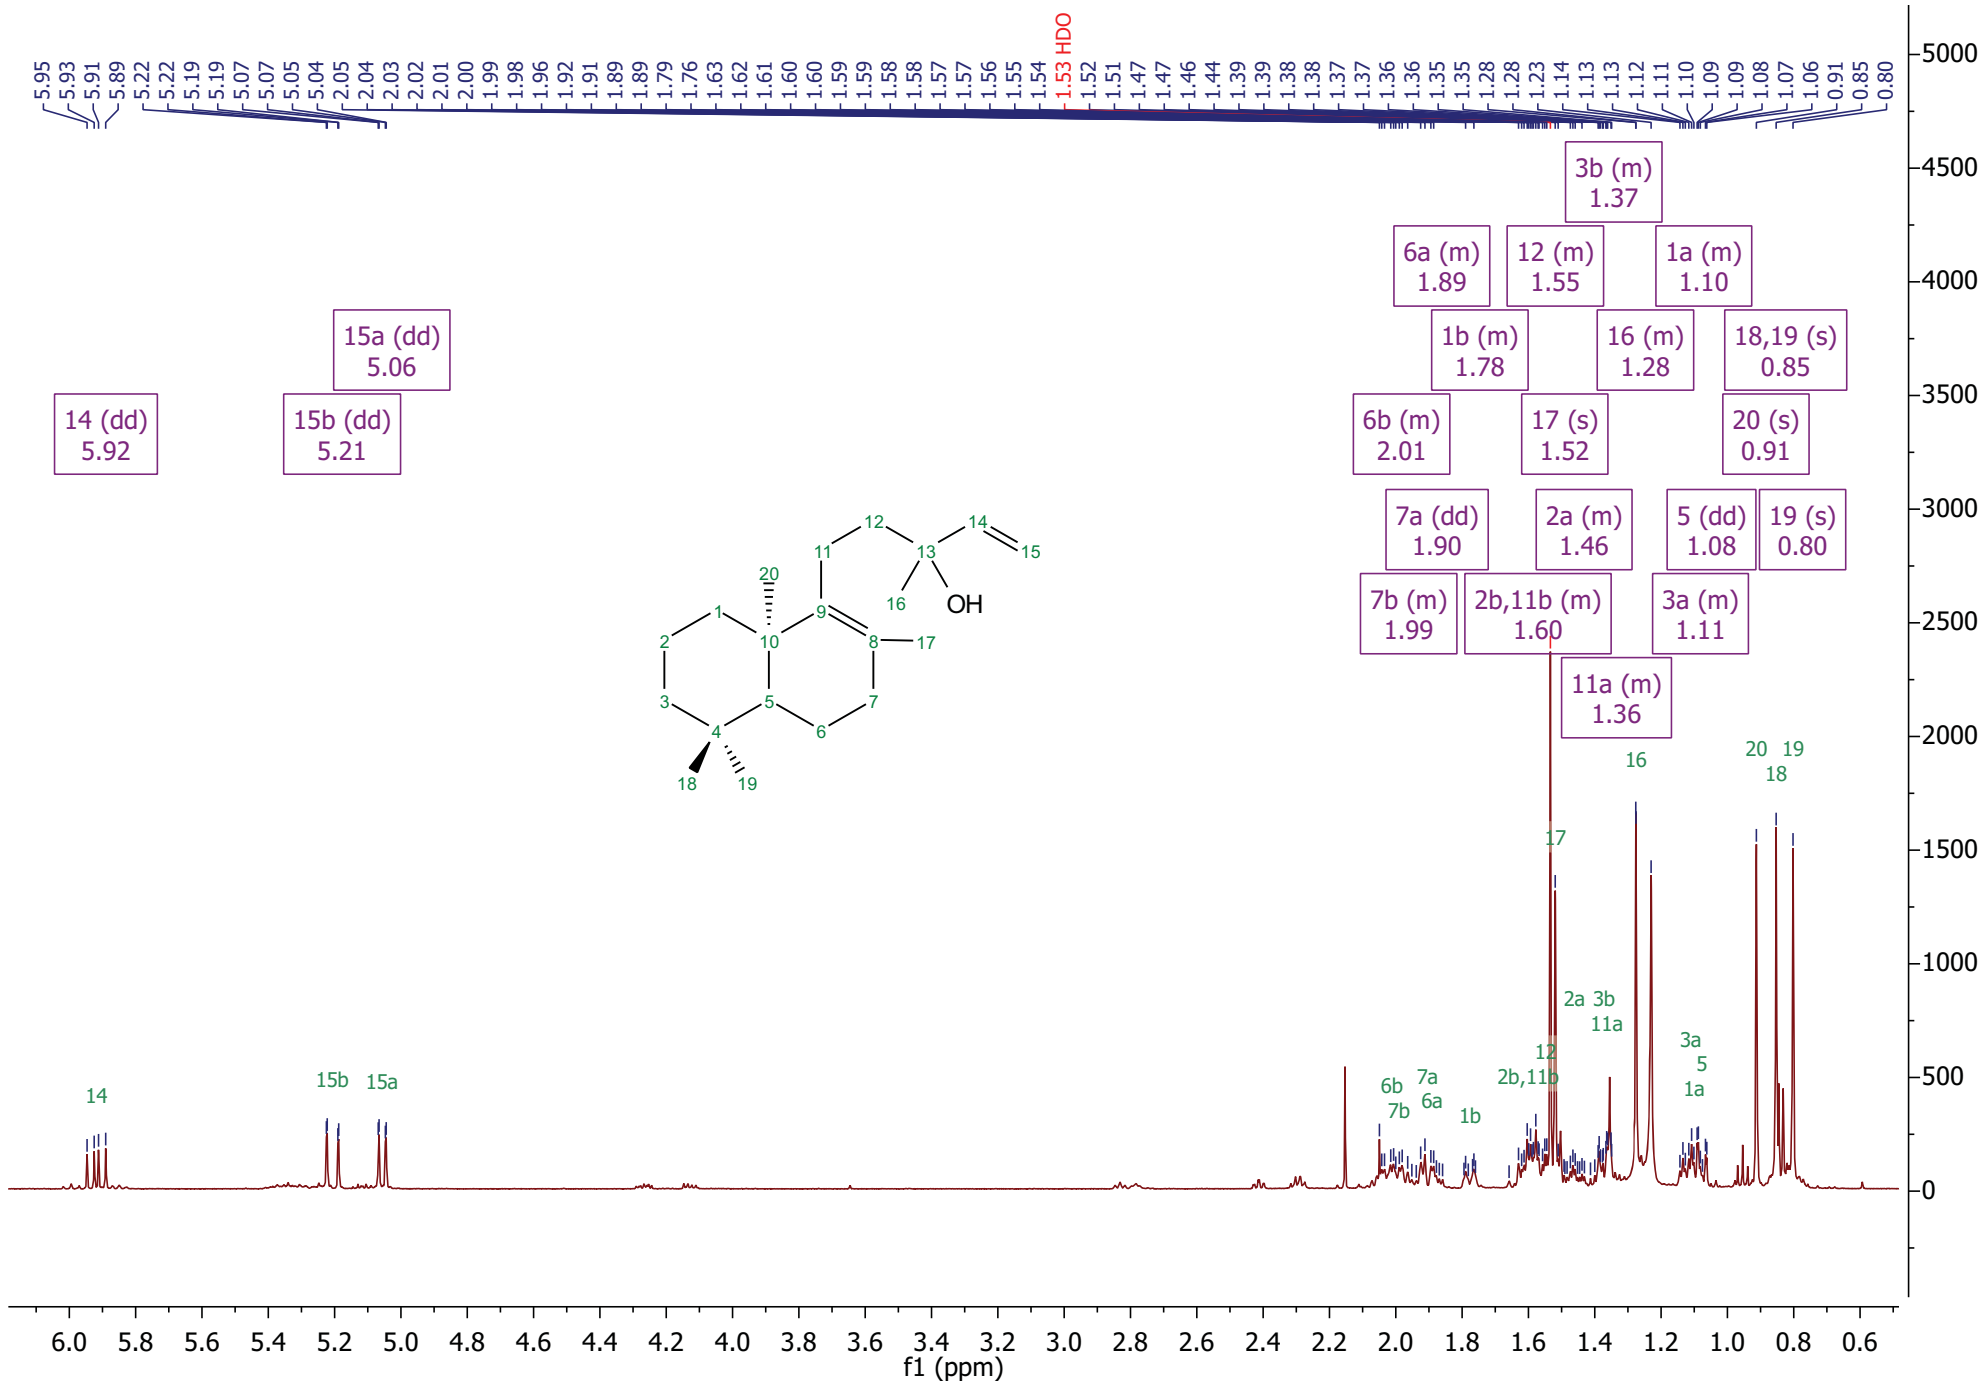

Figure S15-A. <sup>1</sup>H NMR of (10R)-labda-8,14-dien-13-ol [26].

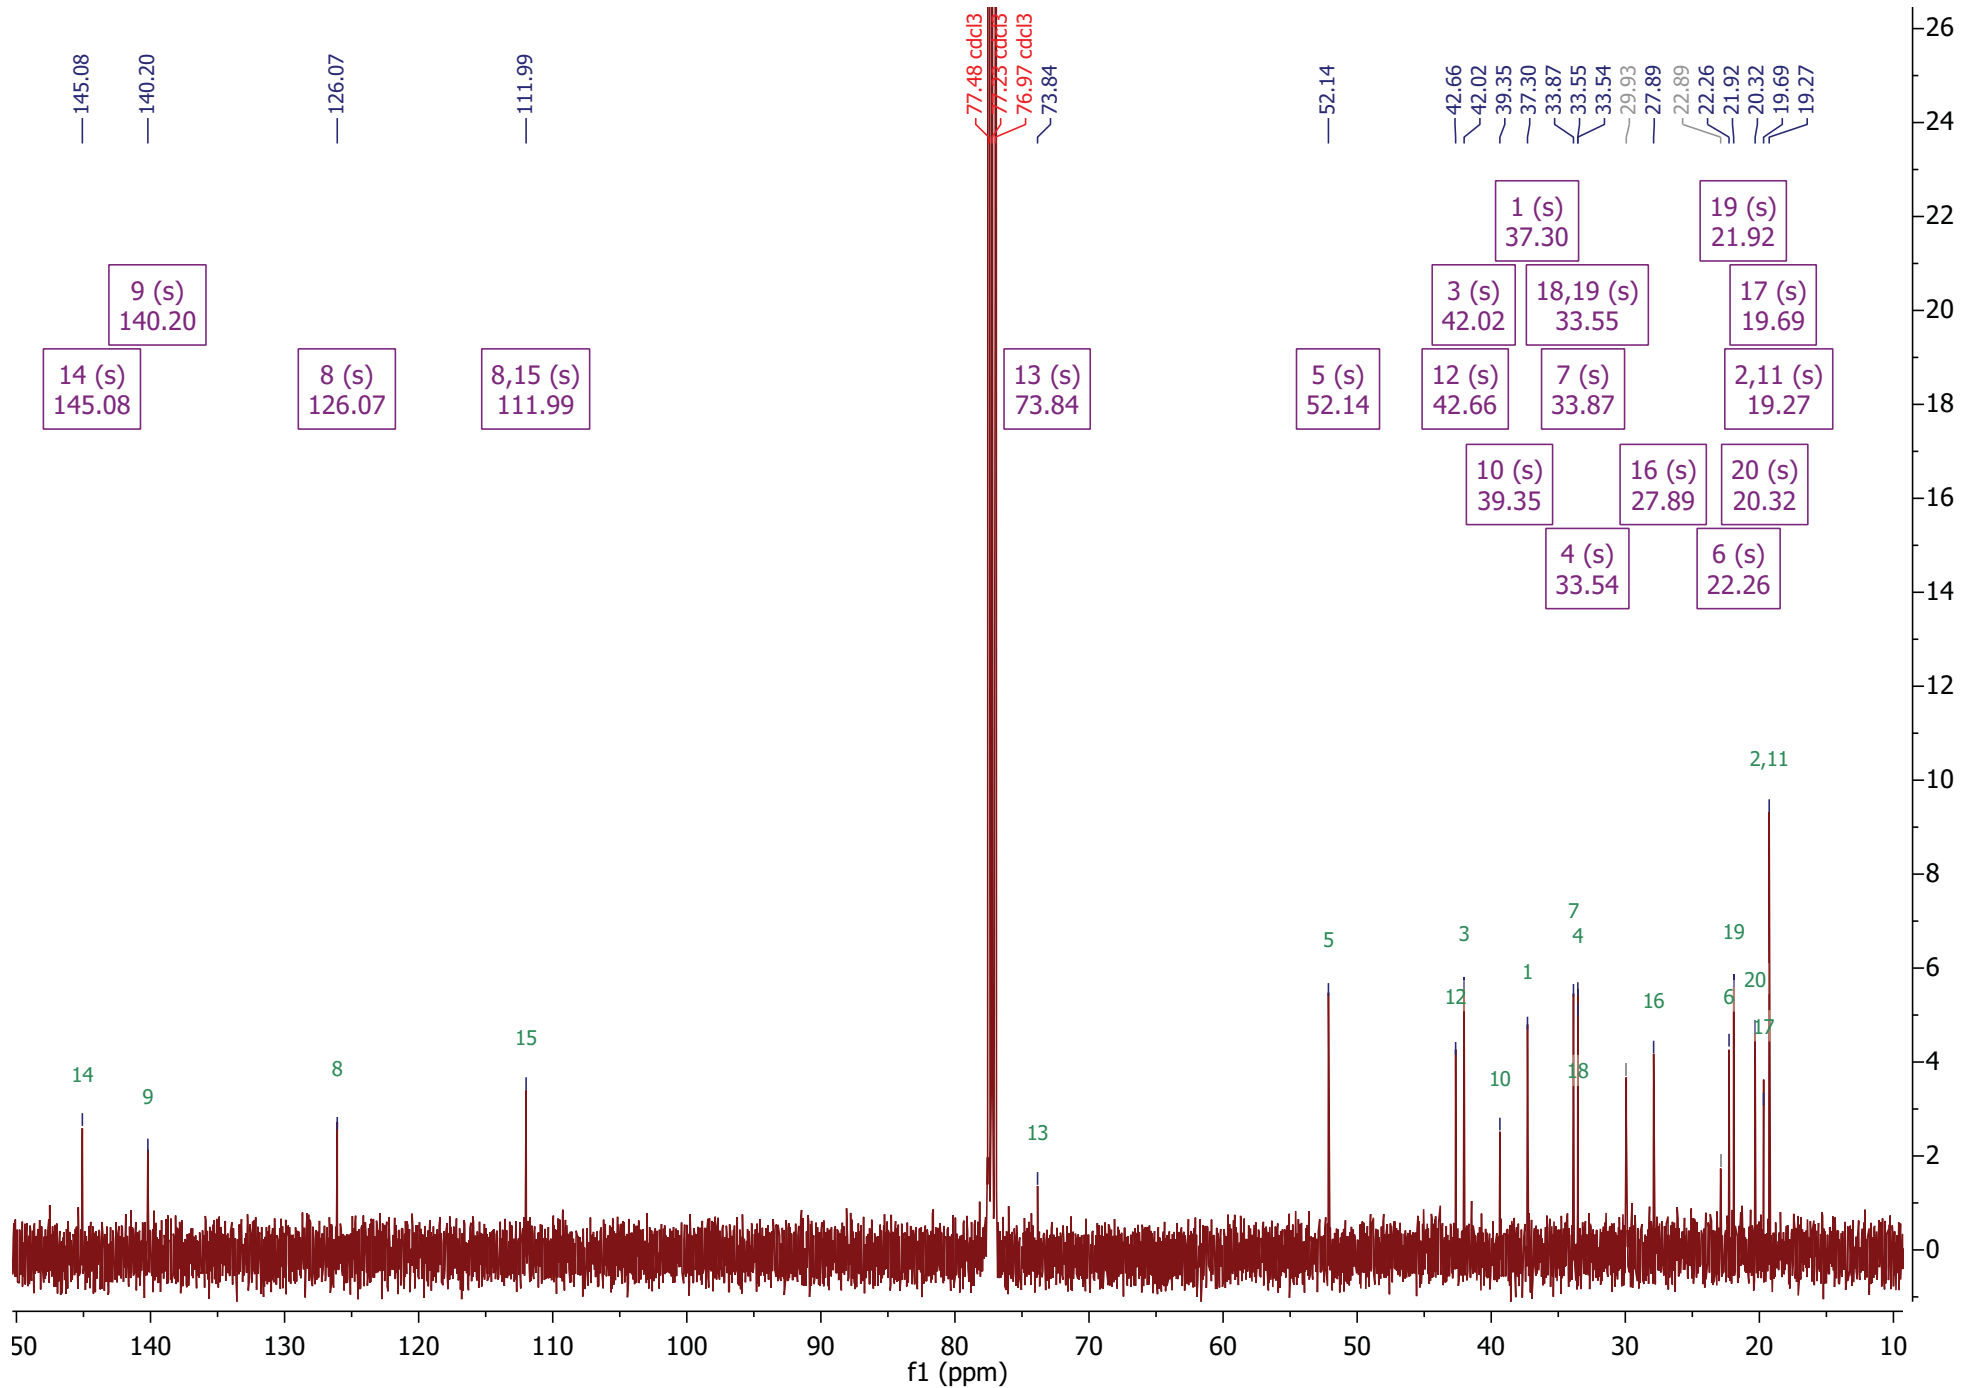

Figure S15-B.  $^{13}\text{C}$  NMR of (10R)-labda-8,14-dien-13-ol [26].

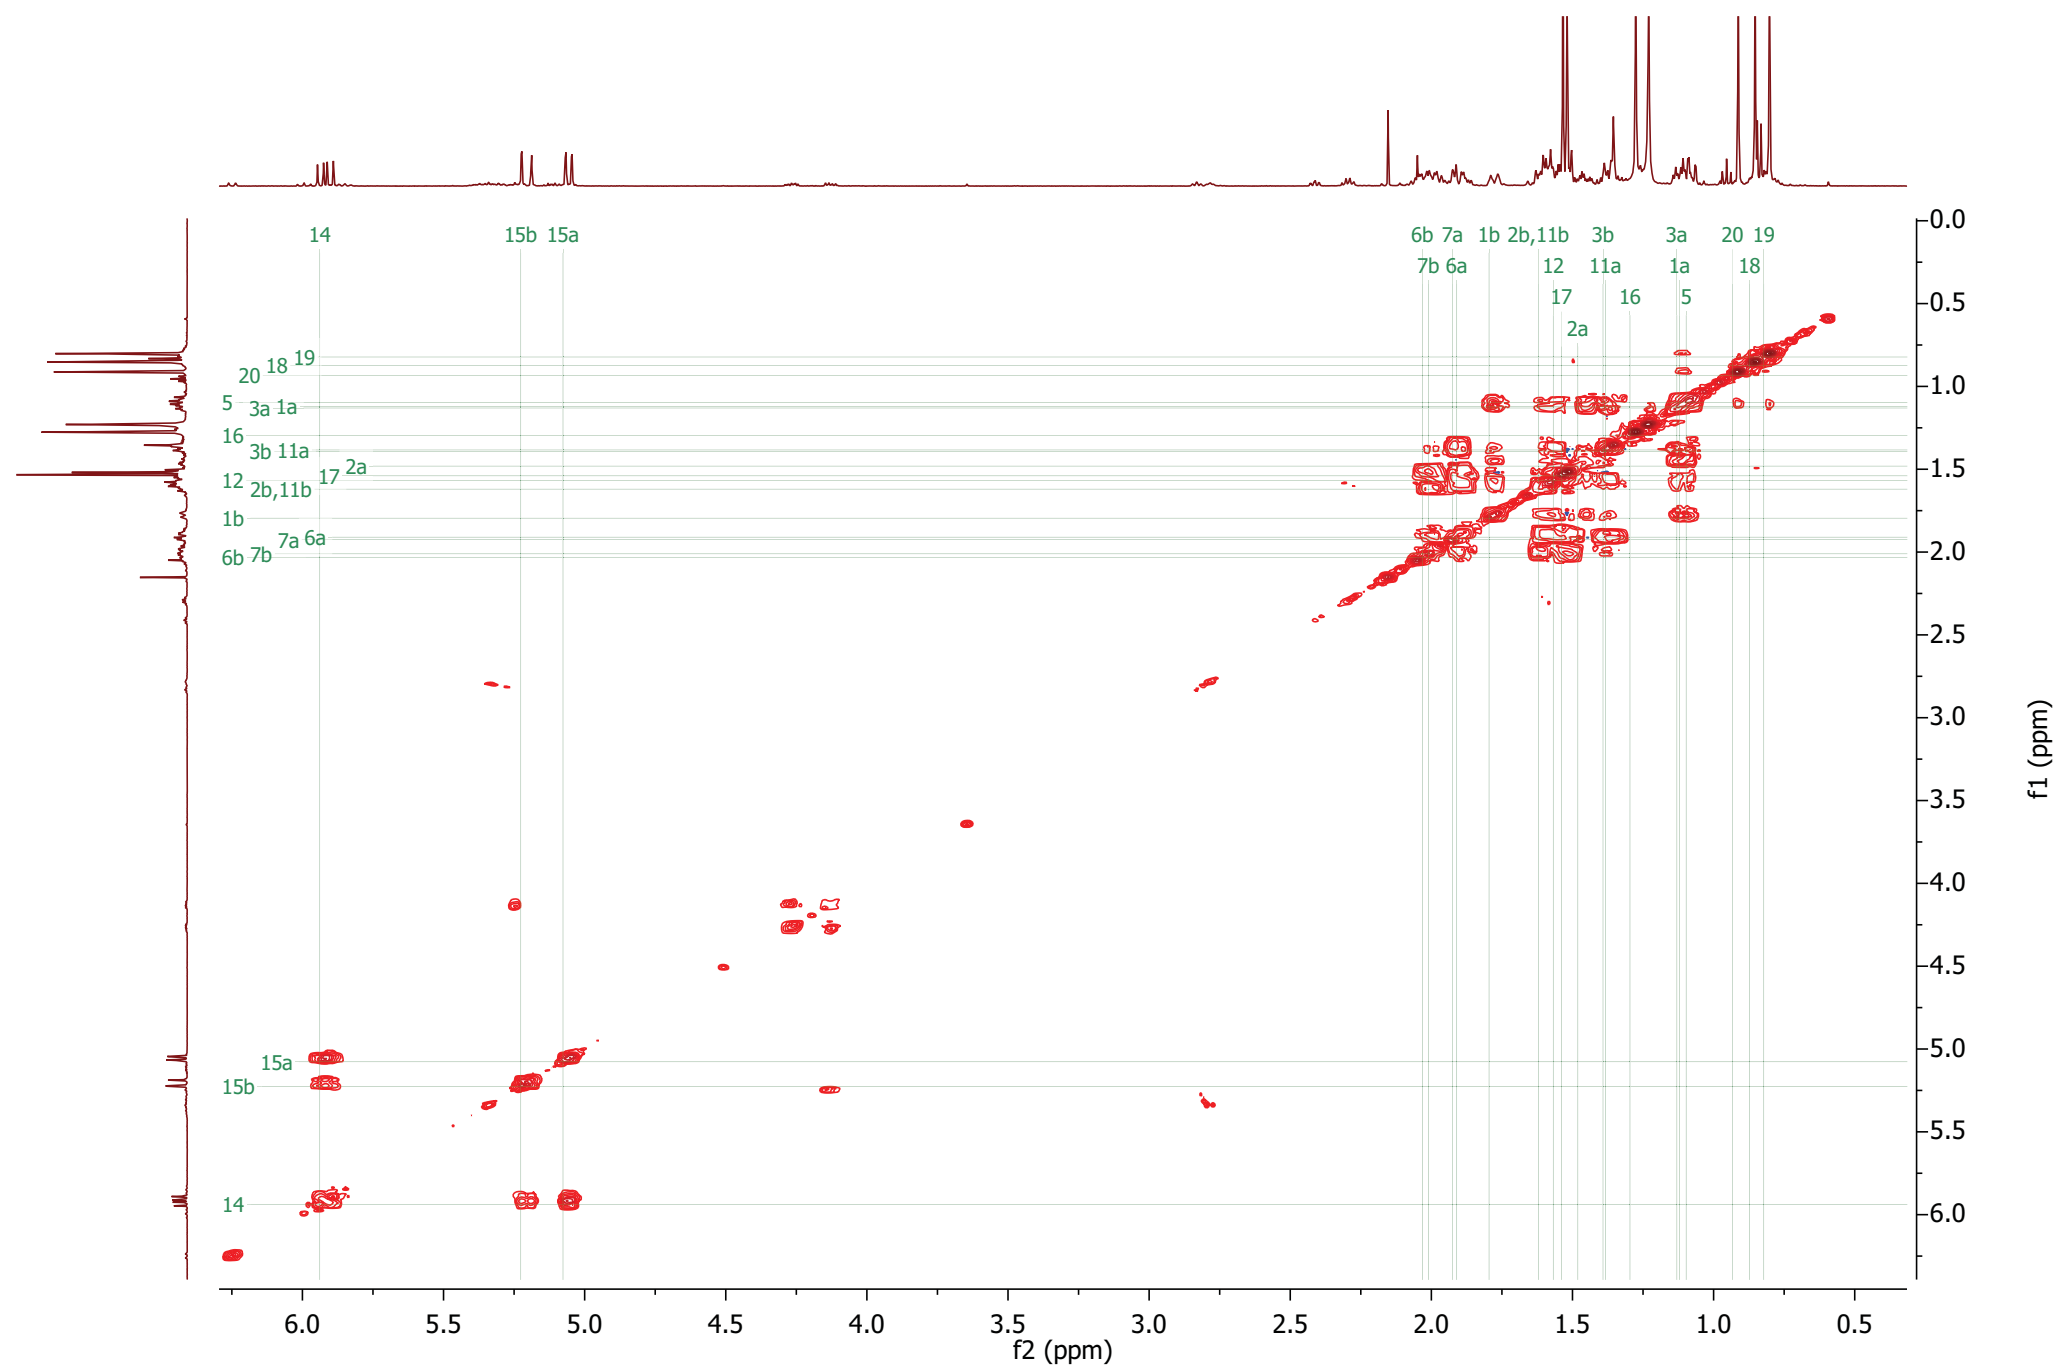

Figure S15-C.  $^1\text{H}$ - $^1\text{H}$  COSY of (10R)-labda-8,14-dien-13-ol [26].



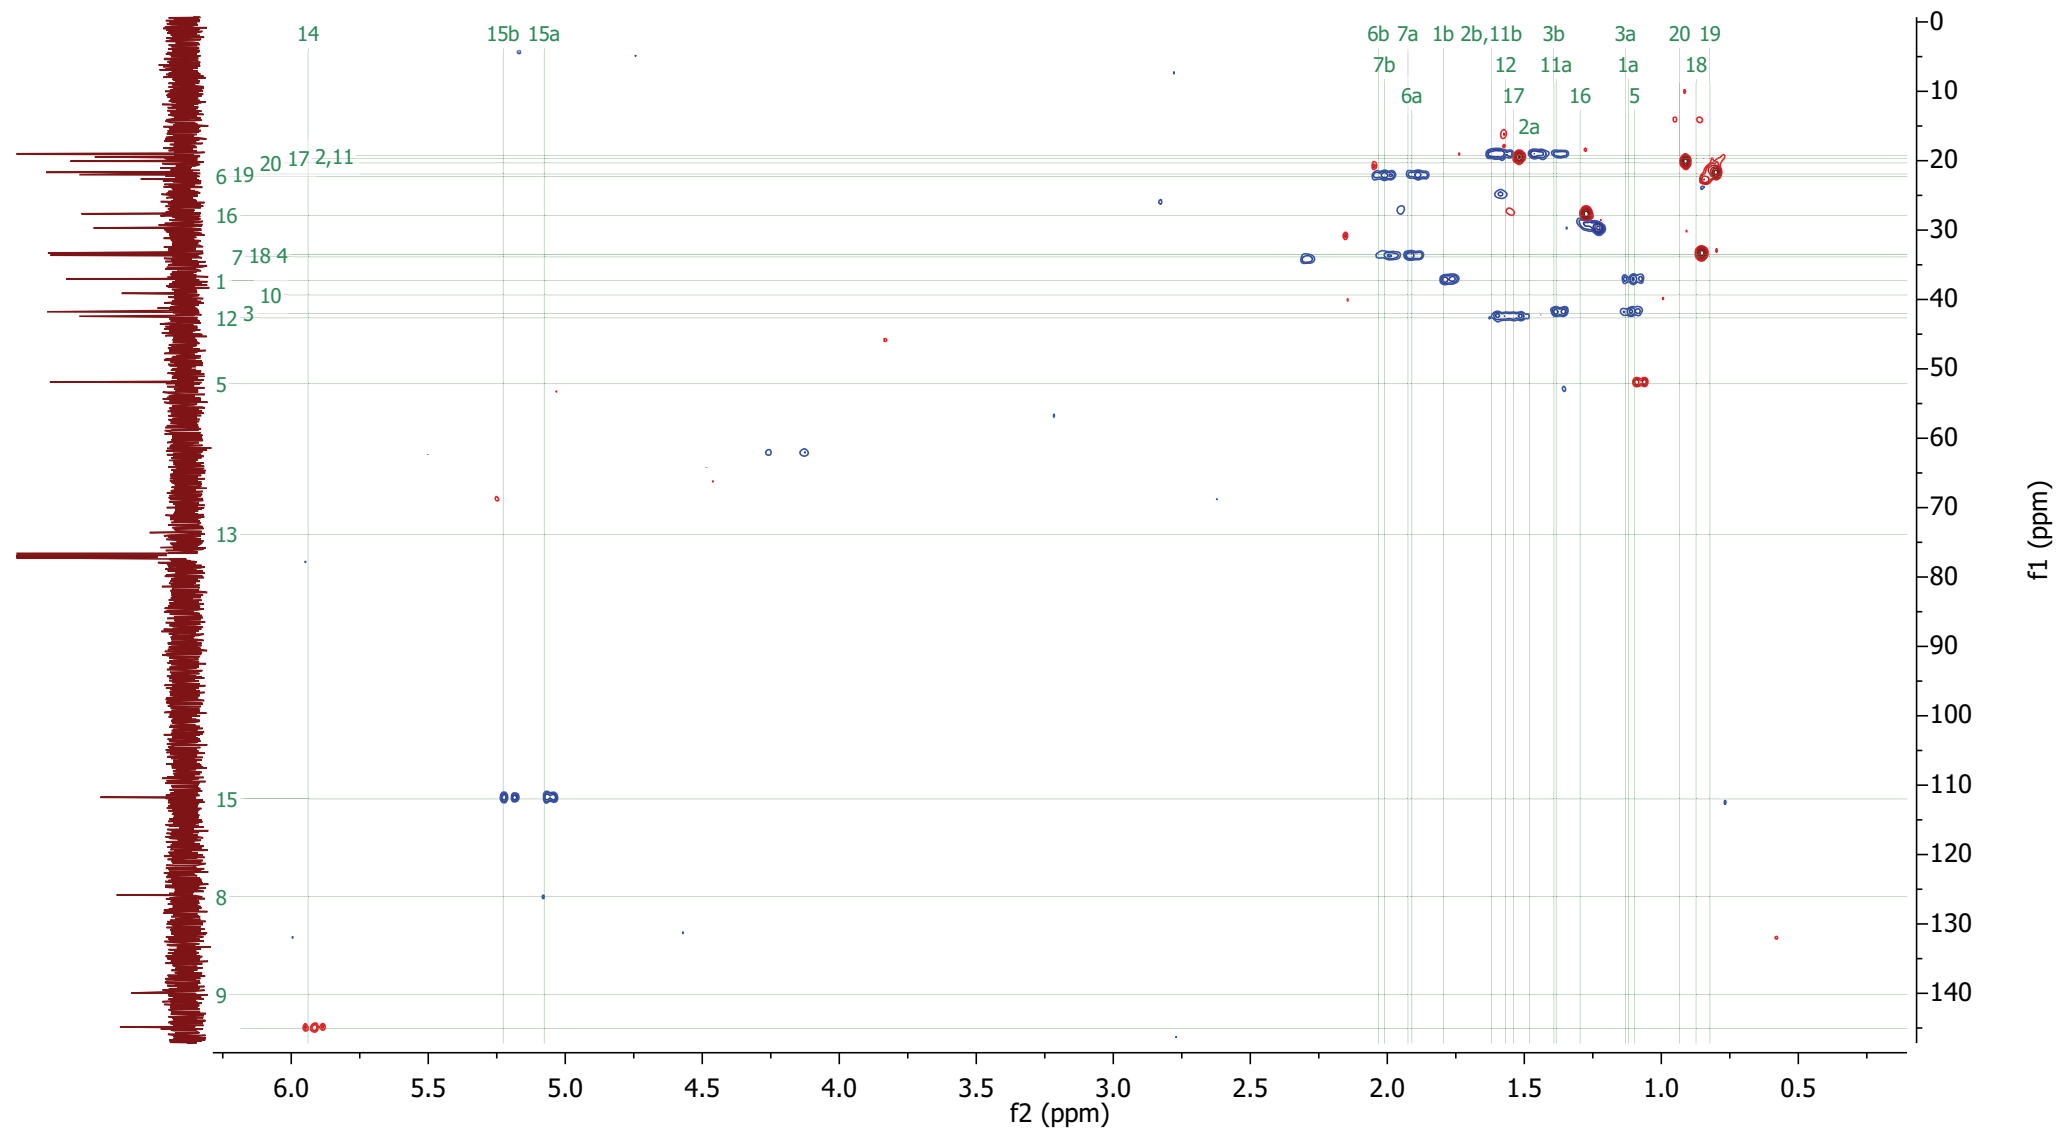

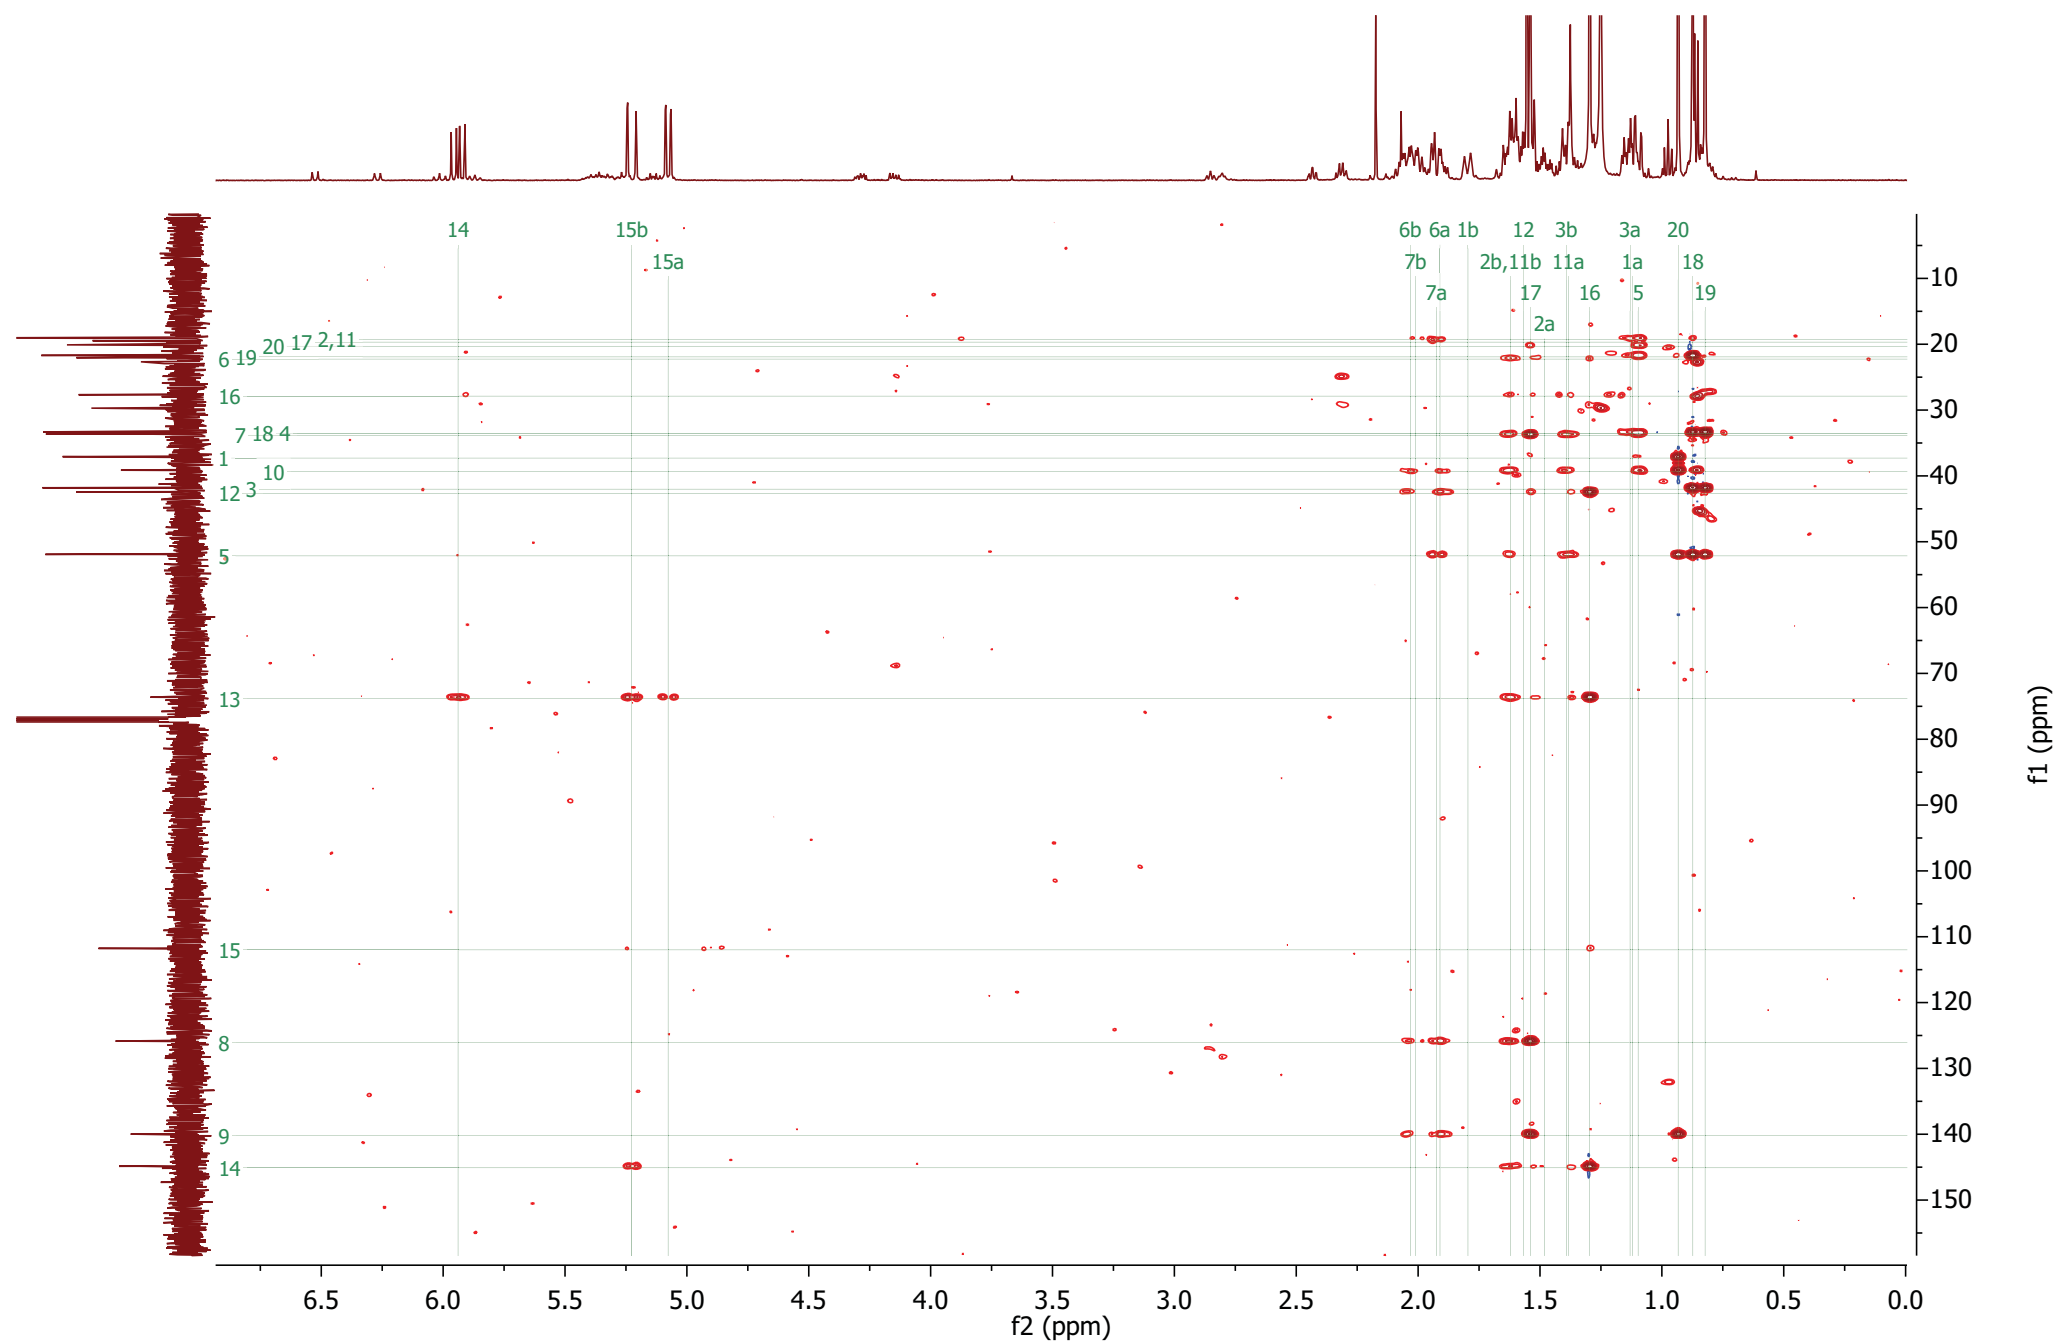

Figure S15-E.  $^1\text{H}$ - $^{13}\text{C}$  HMBC of (10R)-labda-8,14-dien-13-ol [26].

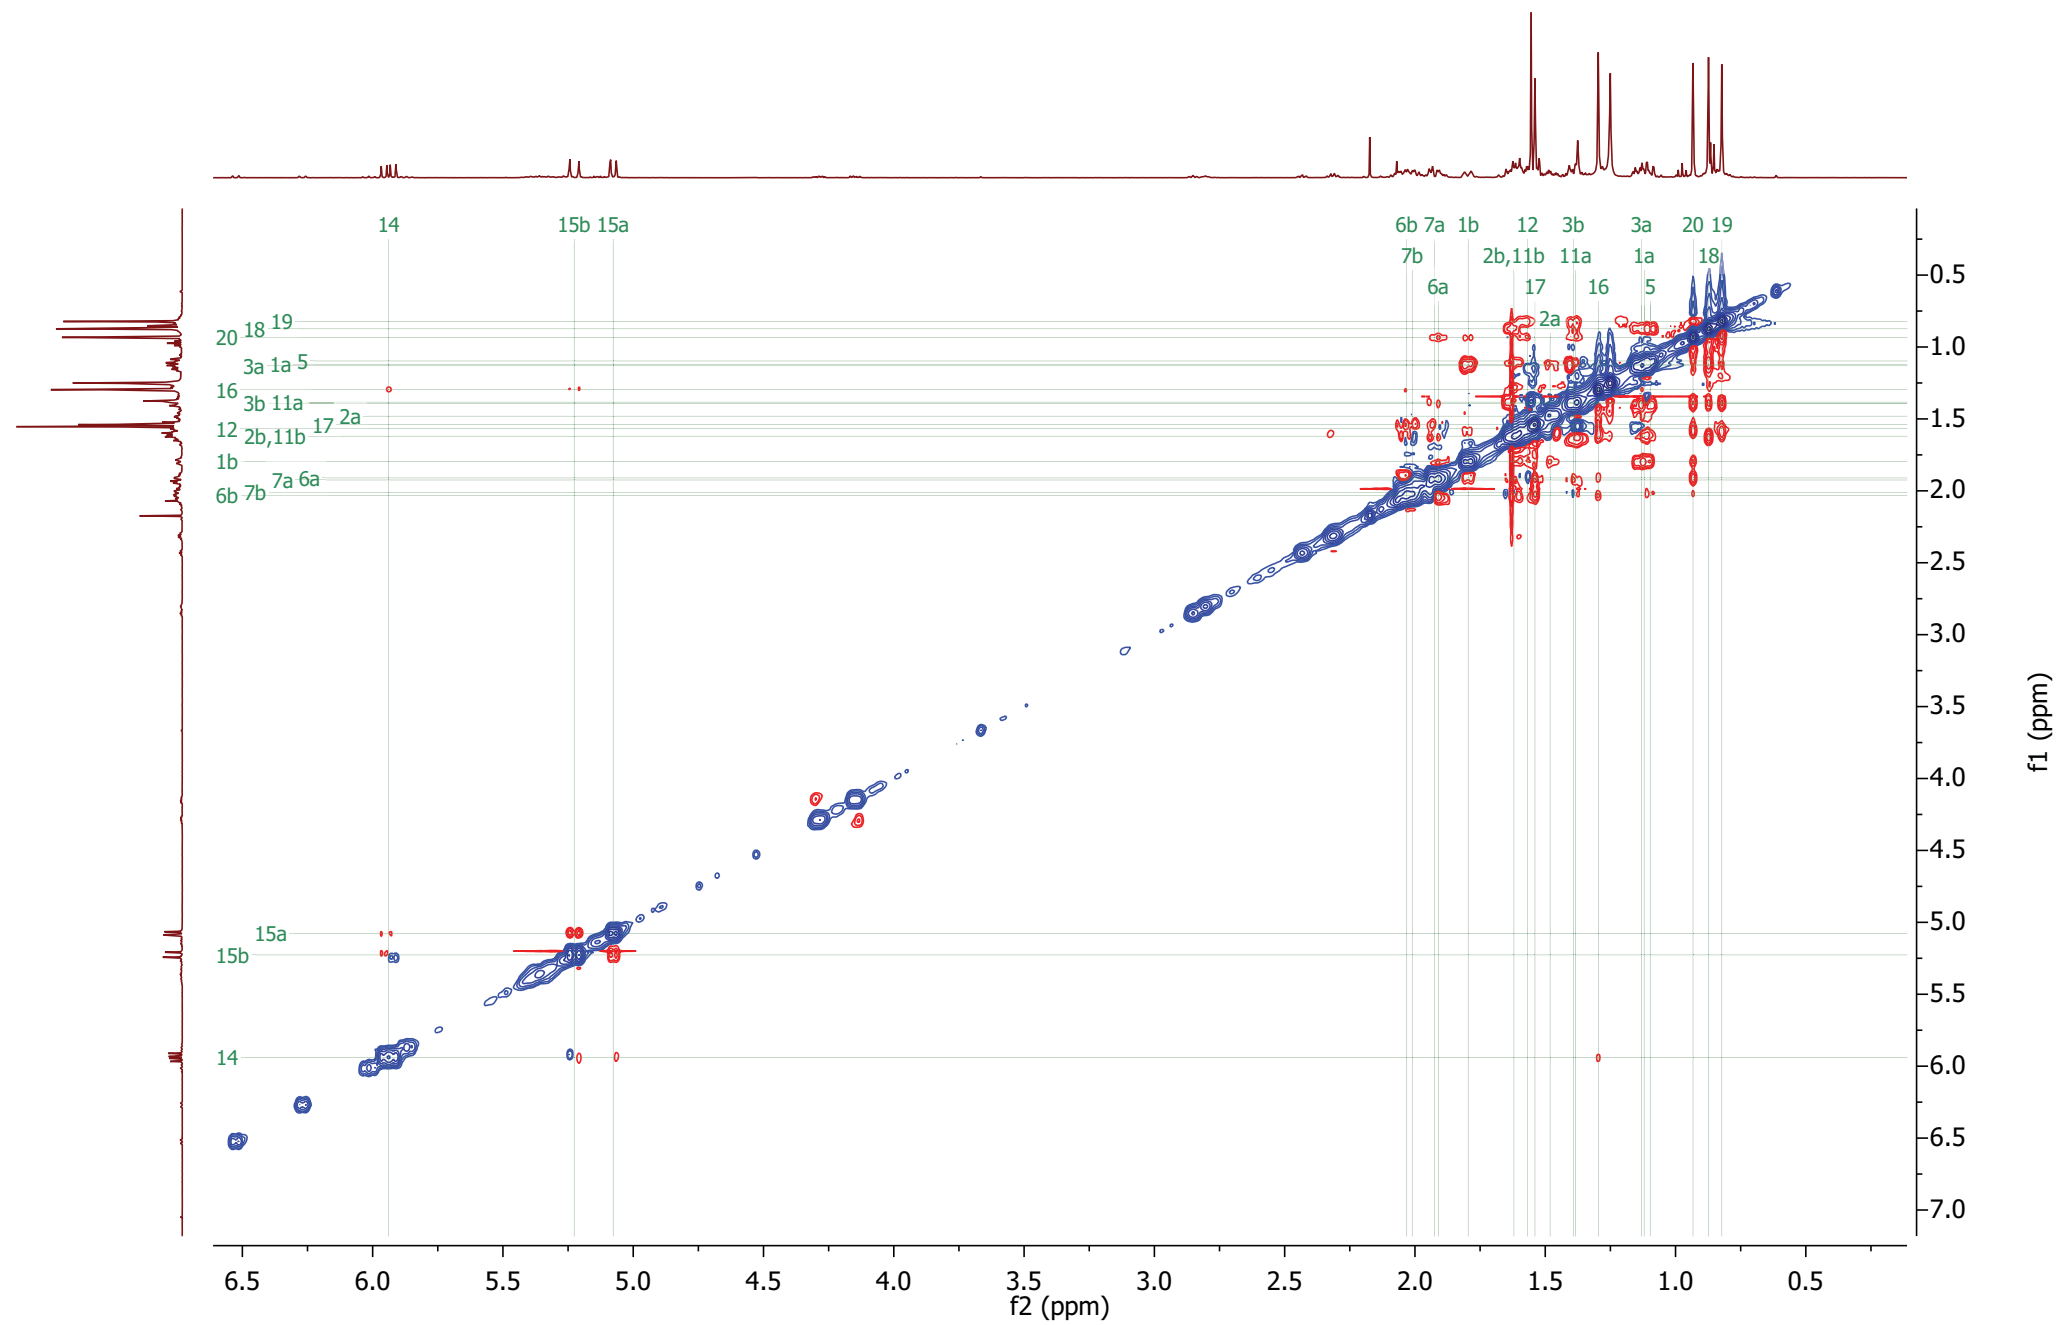

Figure S15-F.  $^1\text{H}$  NOESY of (10R)-labda-8,14-dien-13-ol [26].

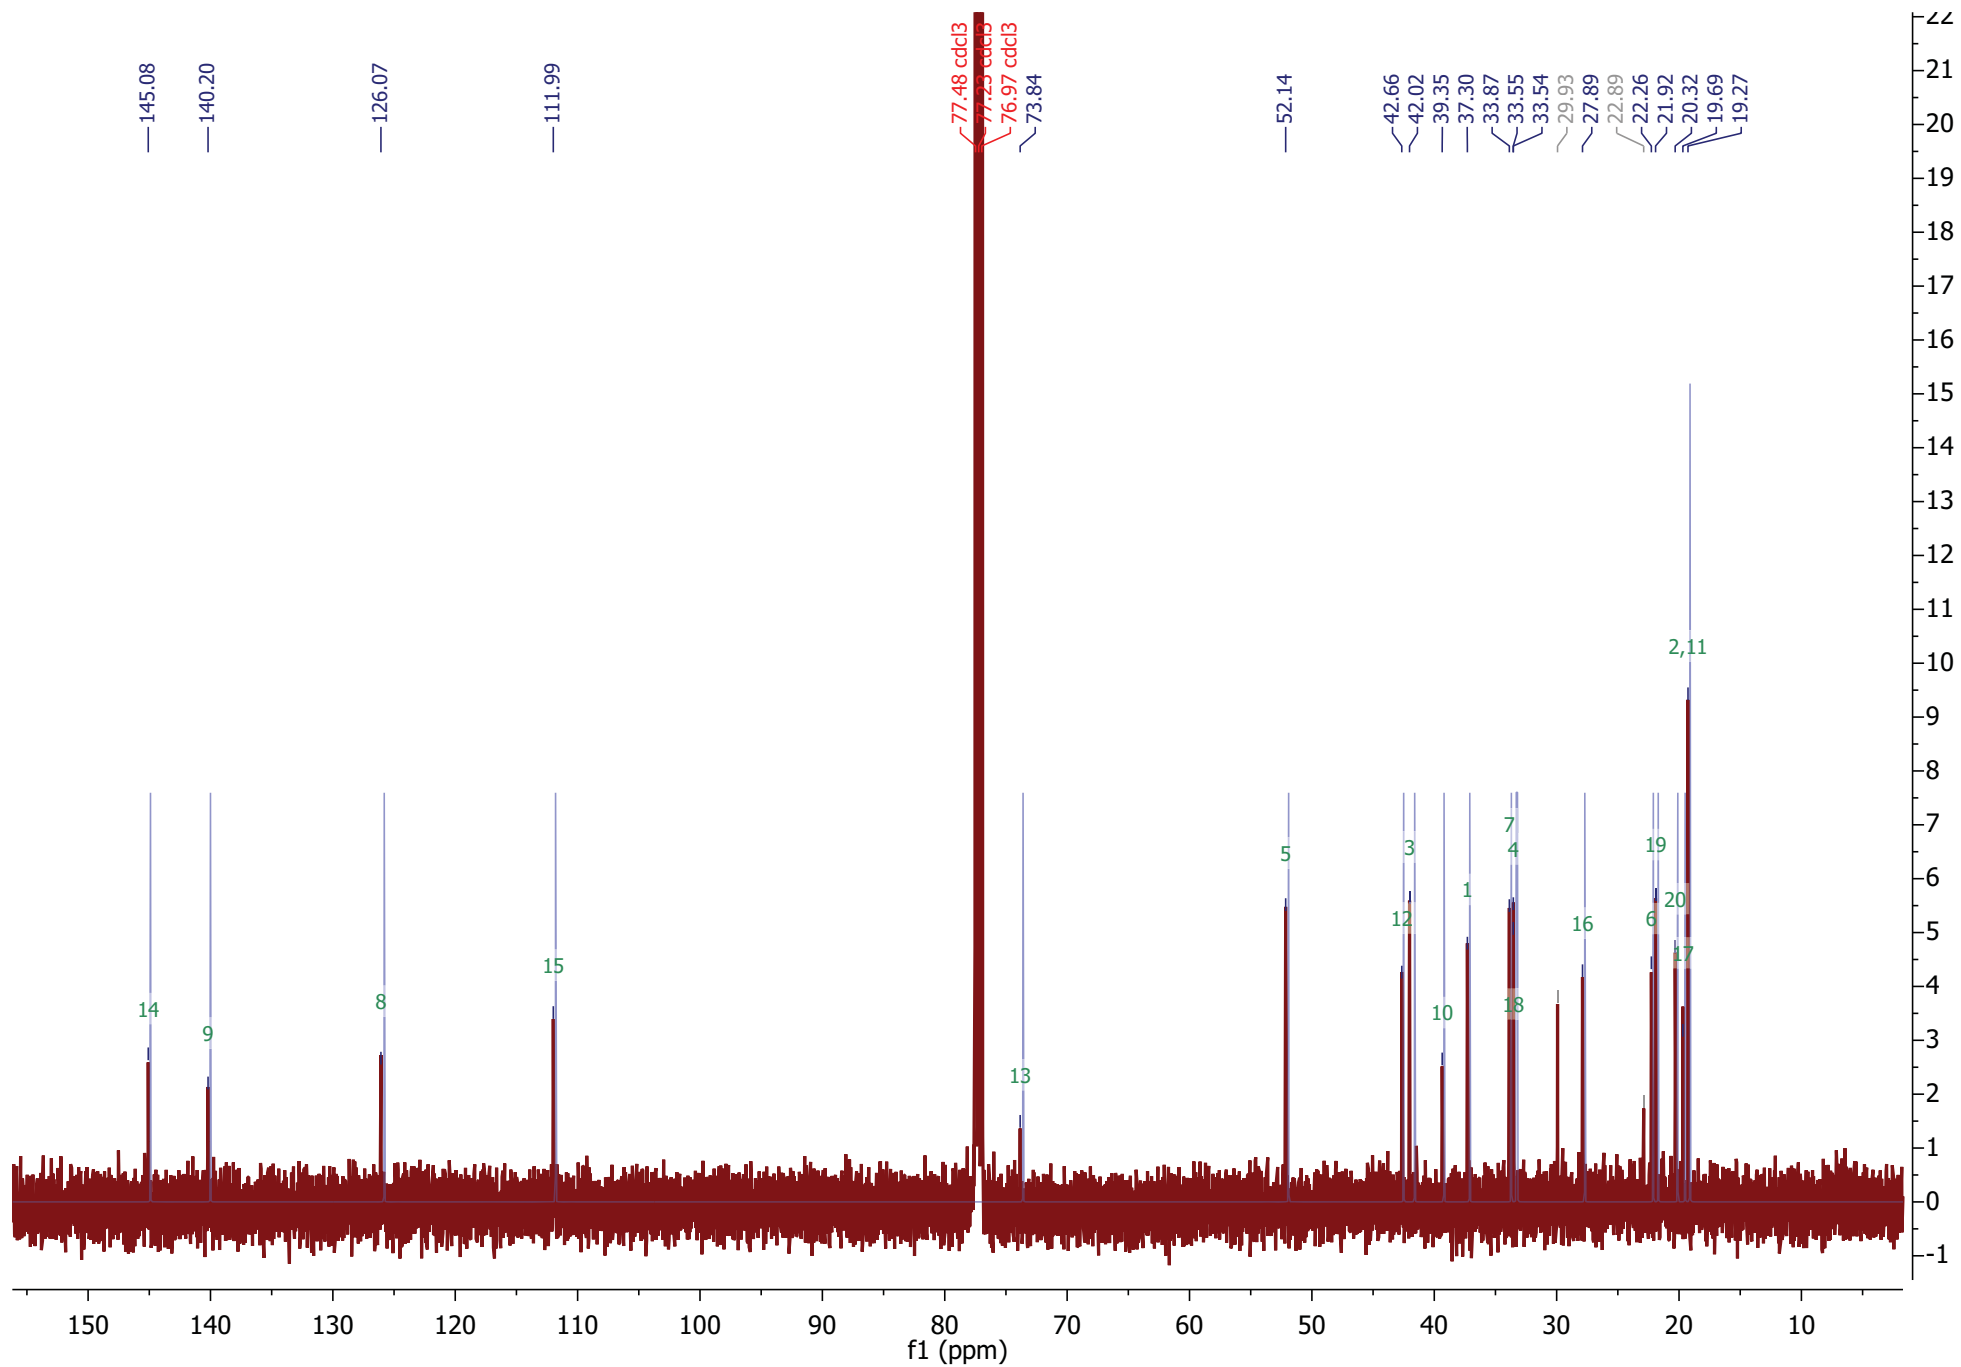

**Figure S15-G.** Overlay of  $^{13}\text{C}$  NMR of (10R)-labda-8,14-dien-13-ol [**26**] (red) with  $^{13}\text{C}$  NMR spectrum (blue) reconstructed from shifts reported for the same compound by Wu and Lin (1997) (DOI: 10.1016/S0031-9422(96)00519-5).

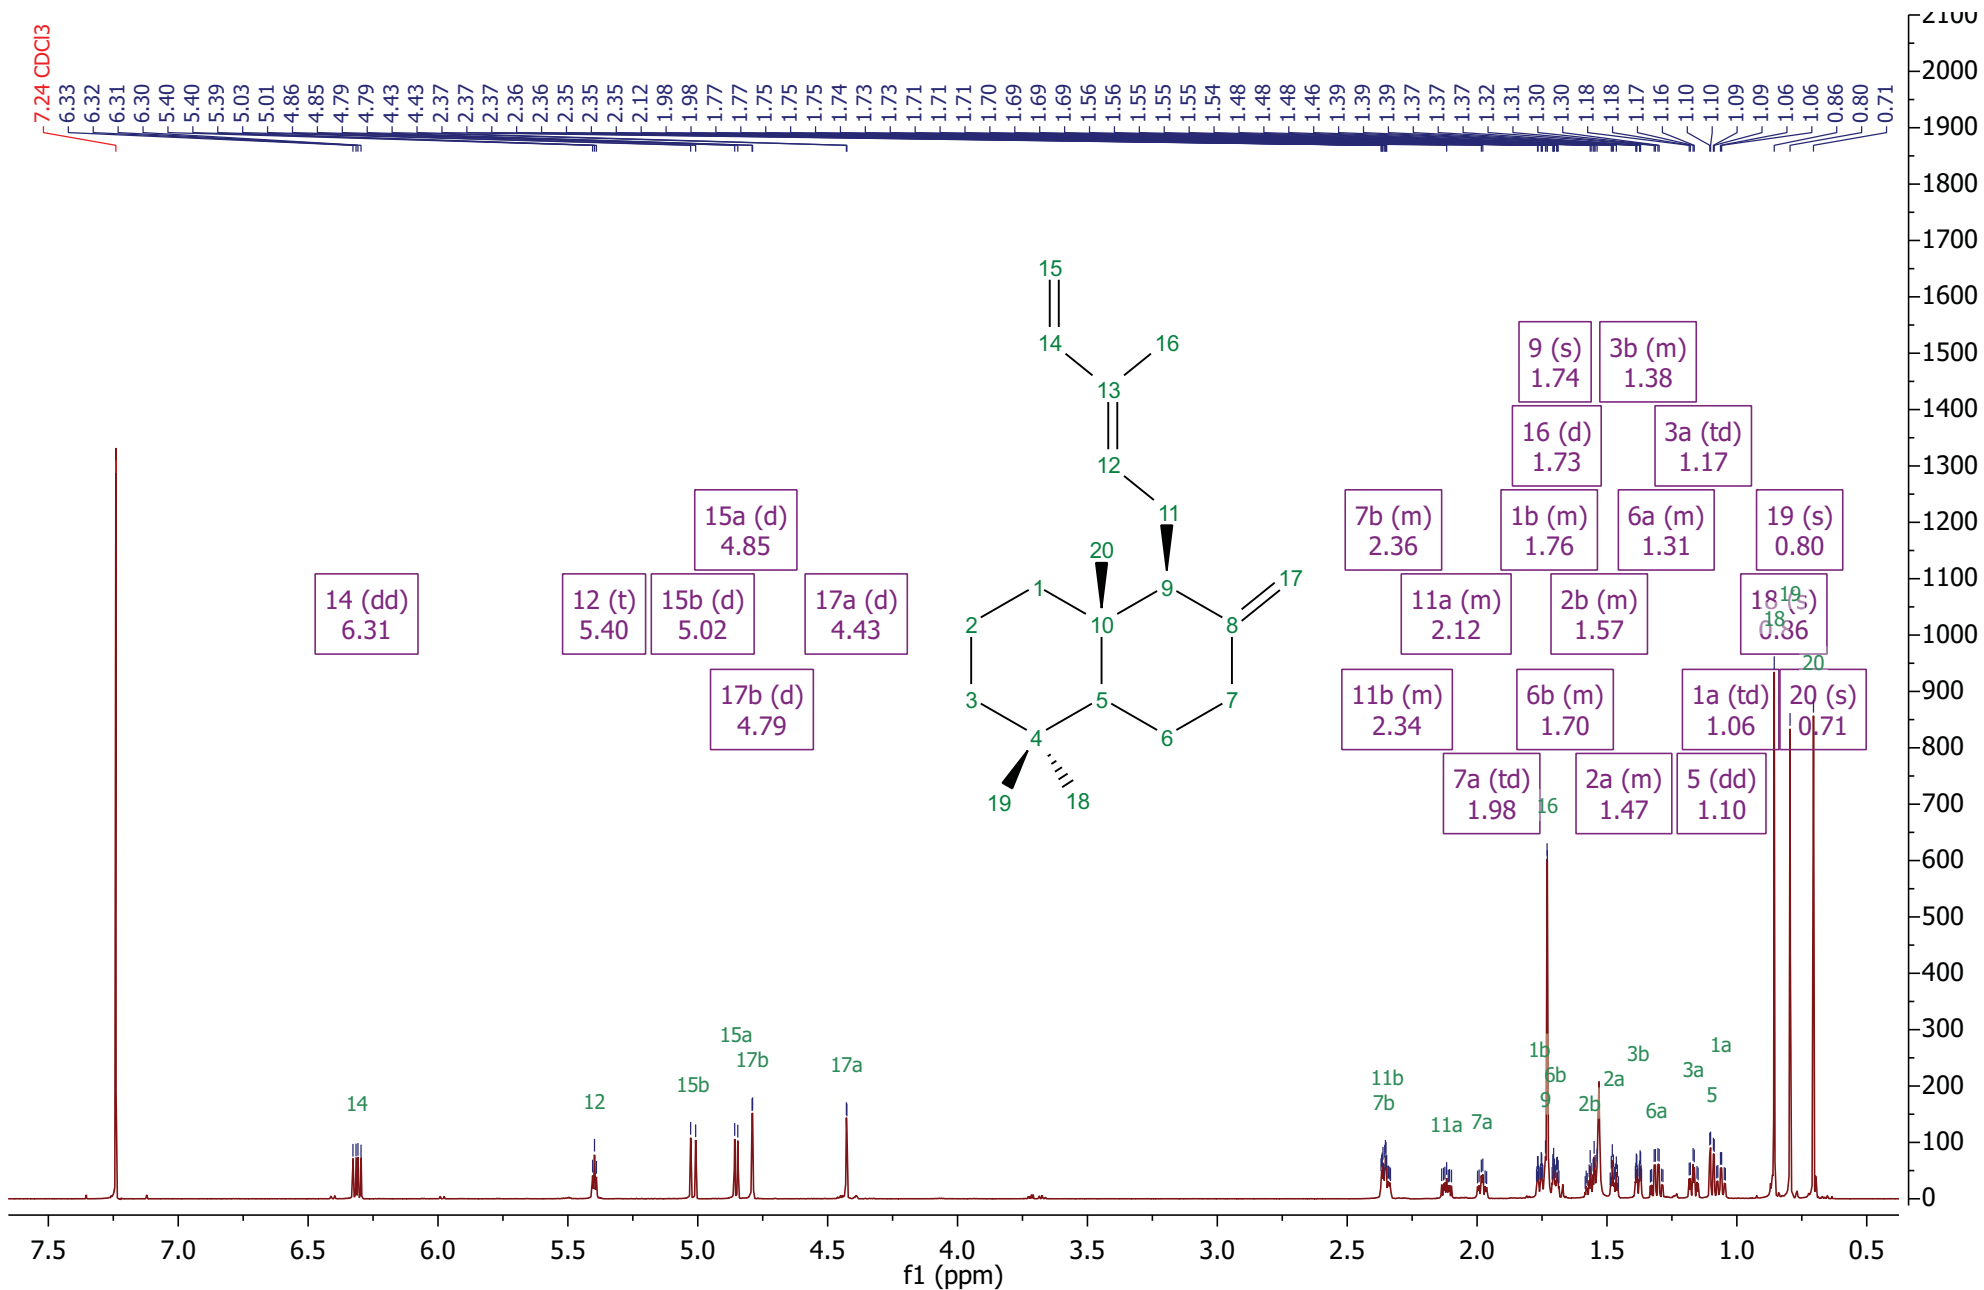

Figure S16-A. <sup>1</sup>H NMR of trans-biformene [34].

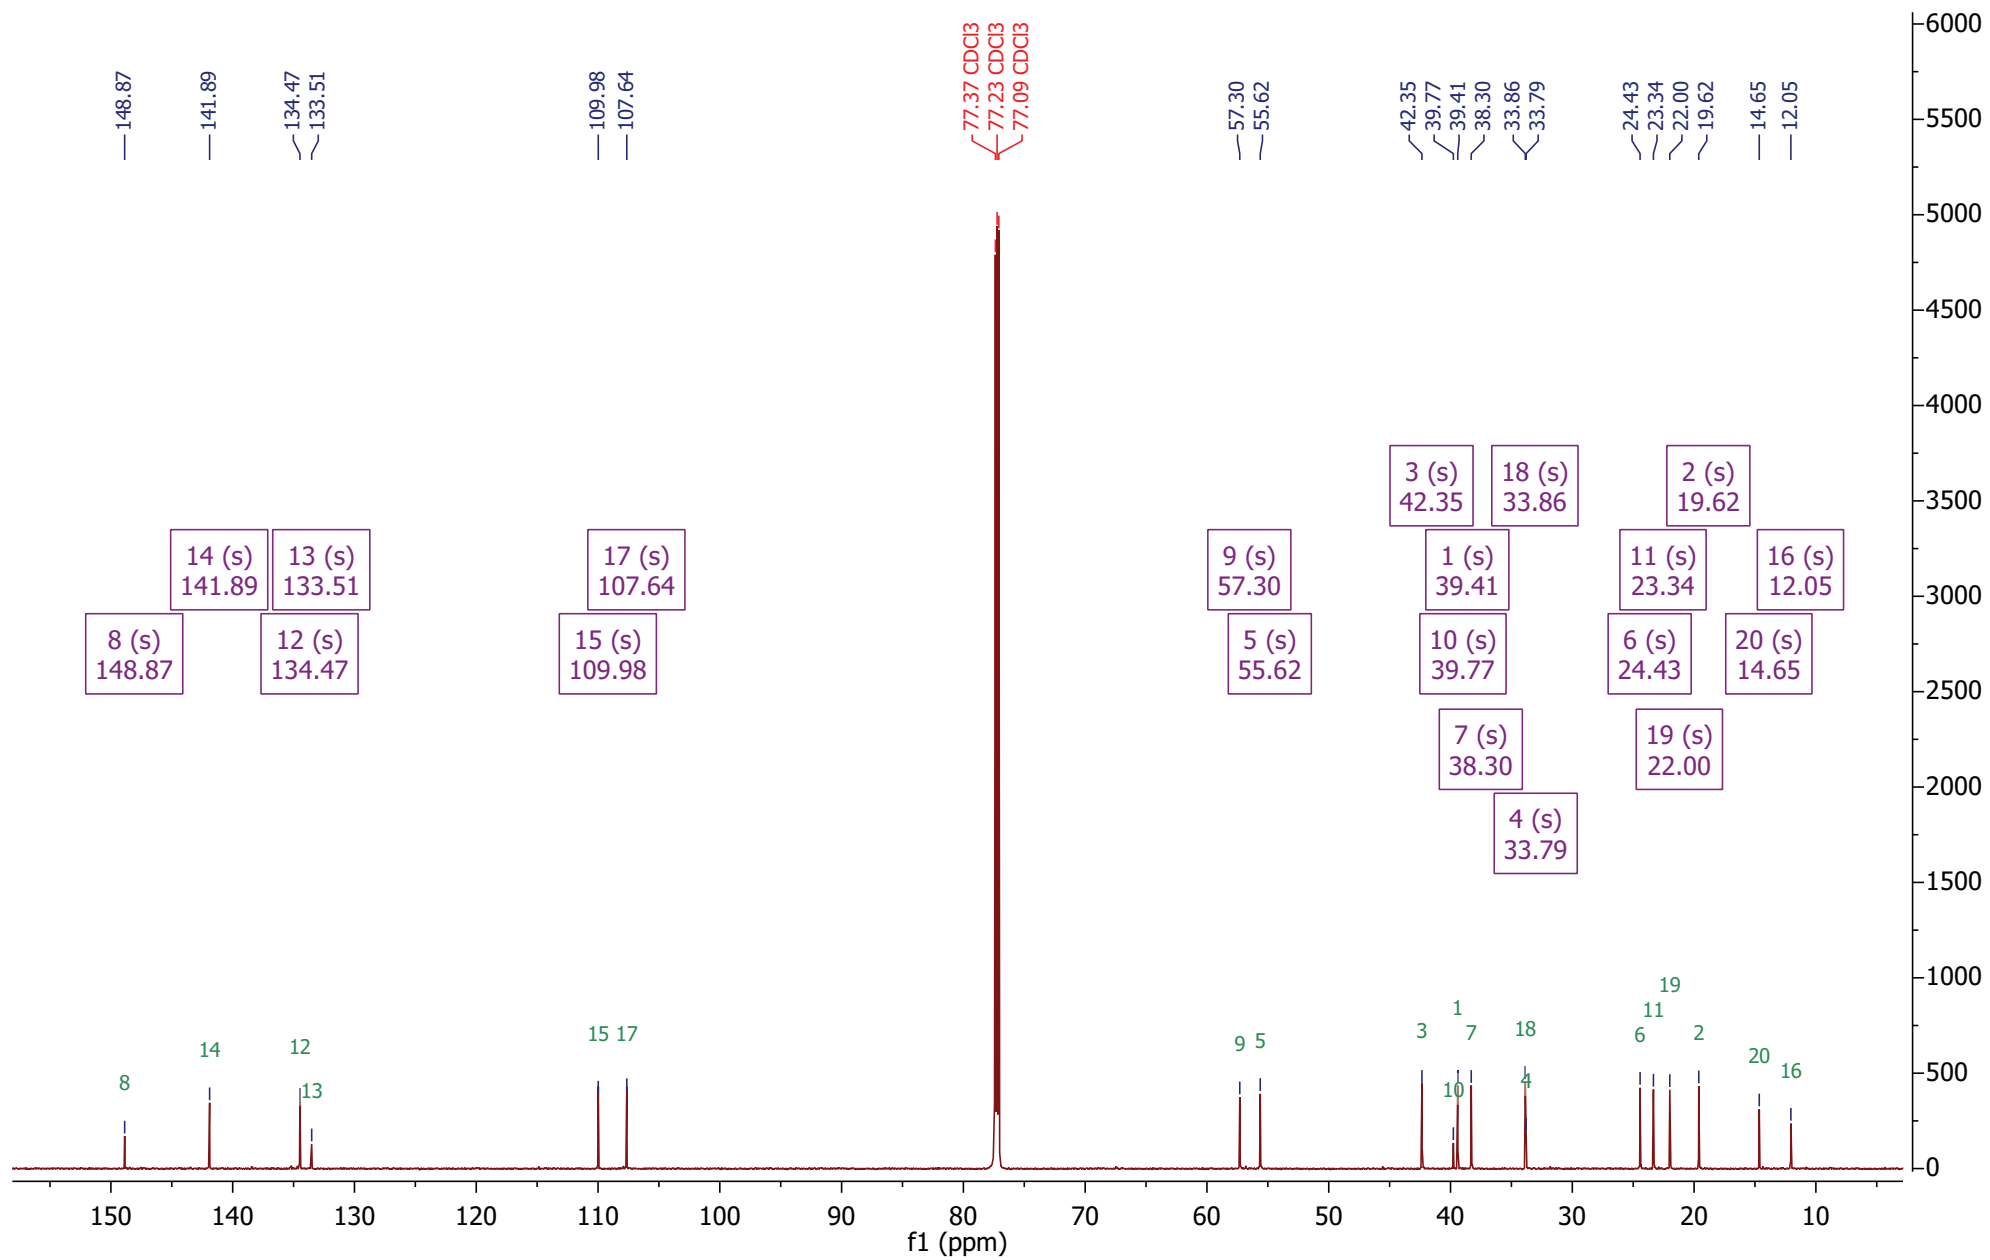

Figure S16-B. <sup>13</sup>C NMR of trans-biformene [34].

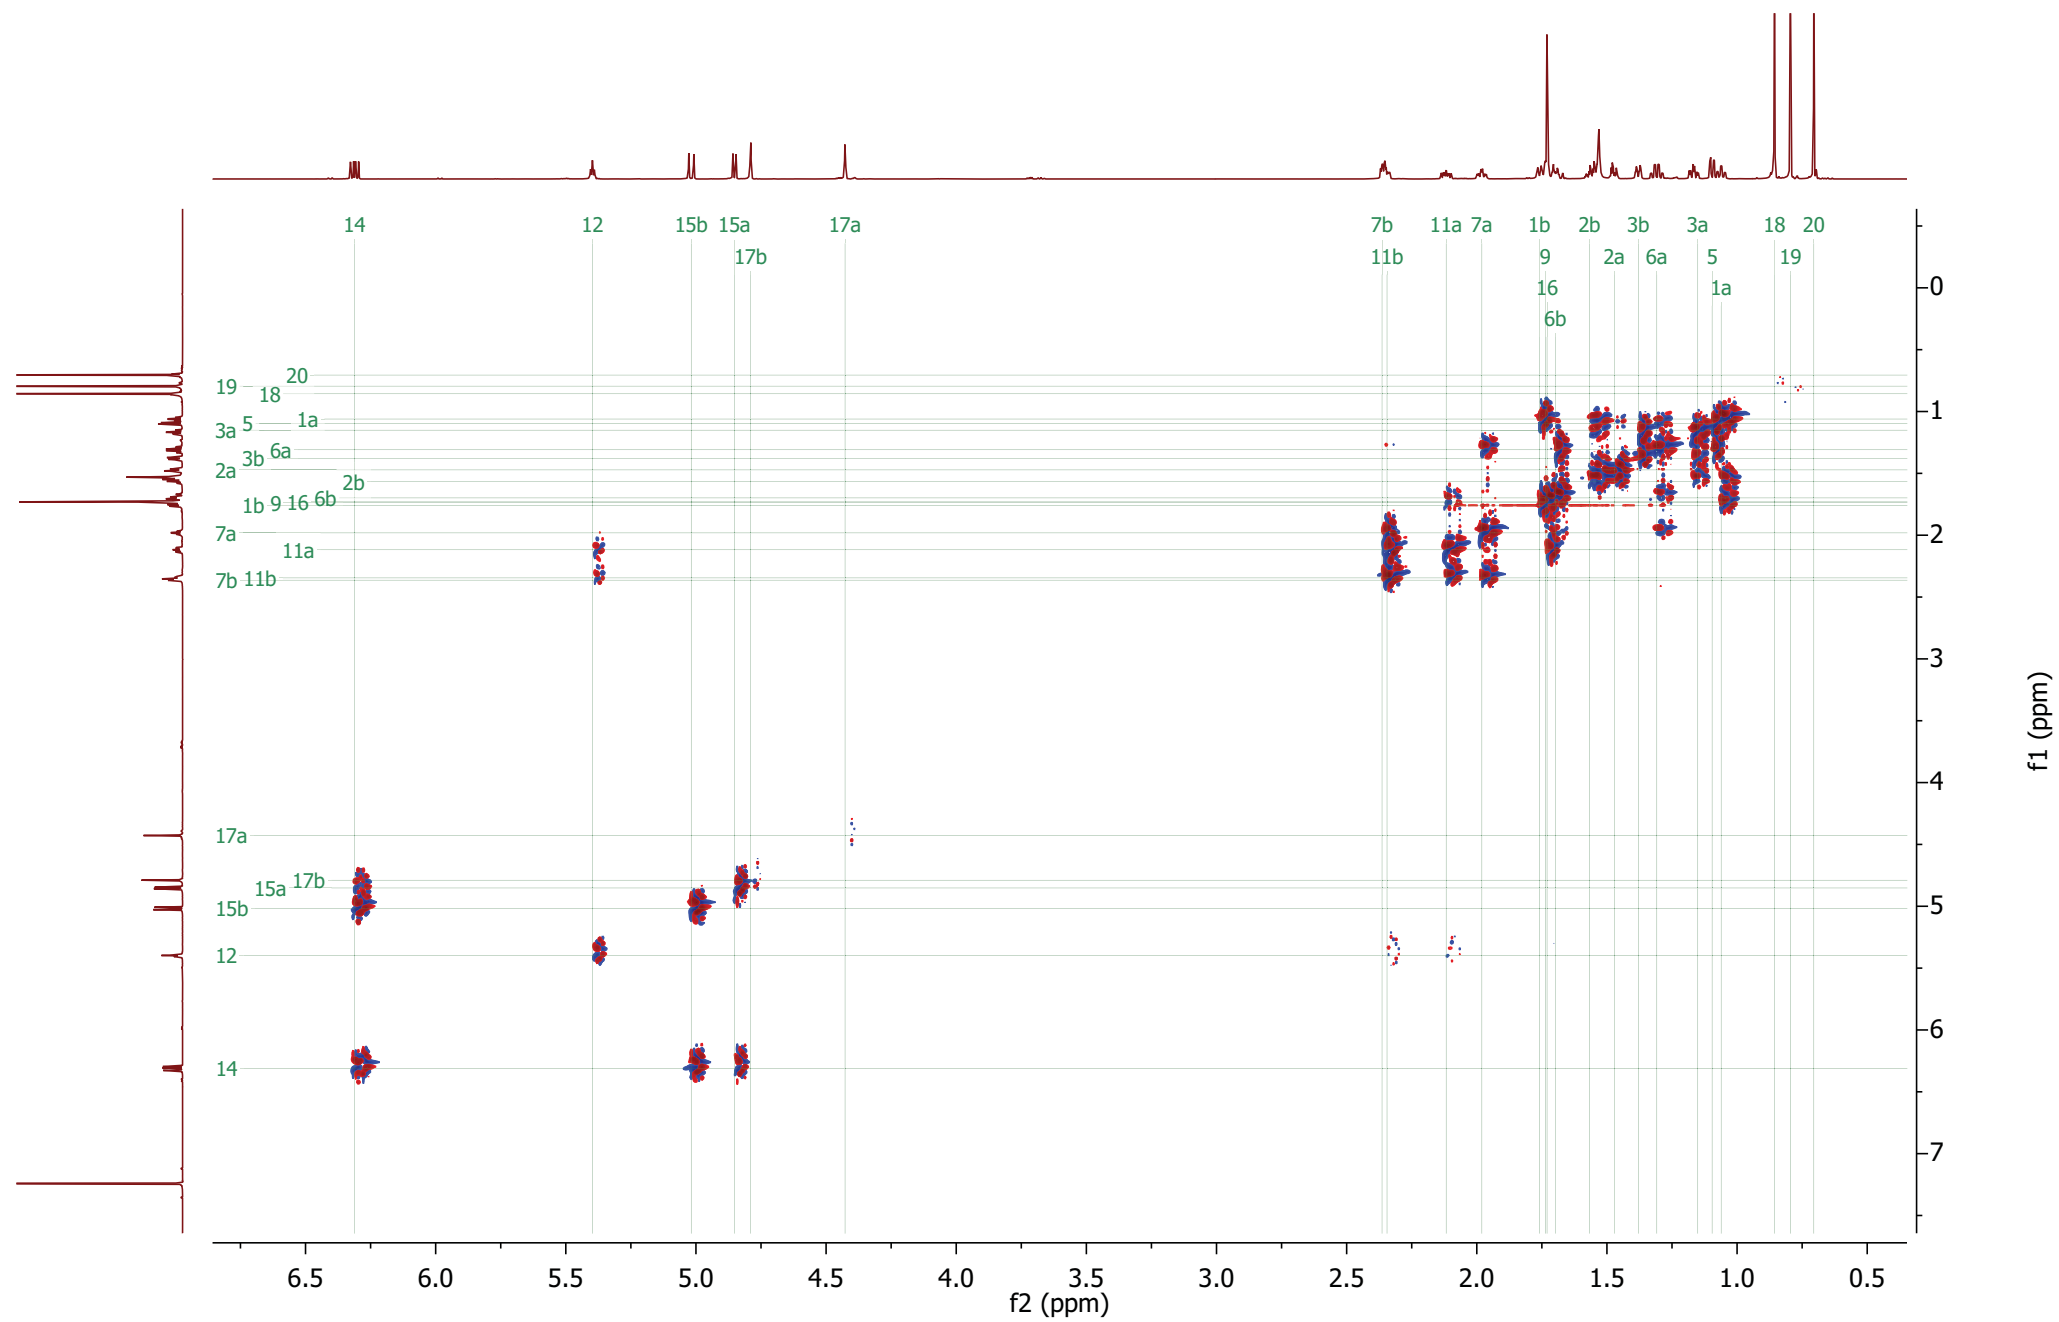

Figure S16-C.  $^1\text{H}$ - $^1\text{H}$  COSY of trans-biformene [34].

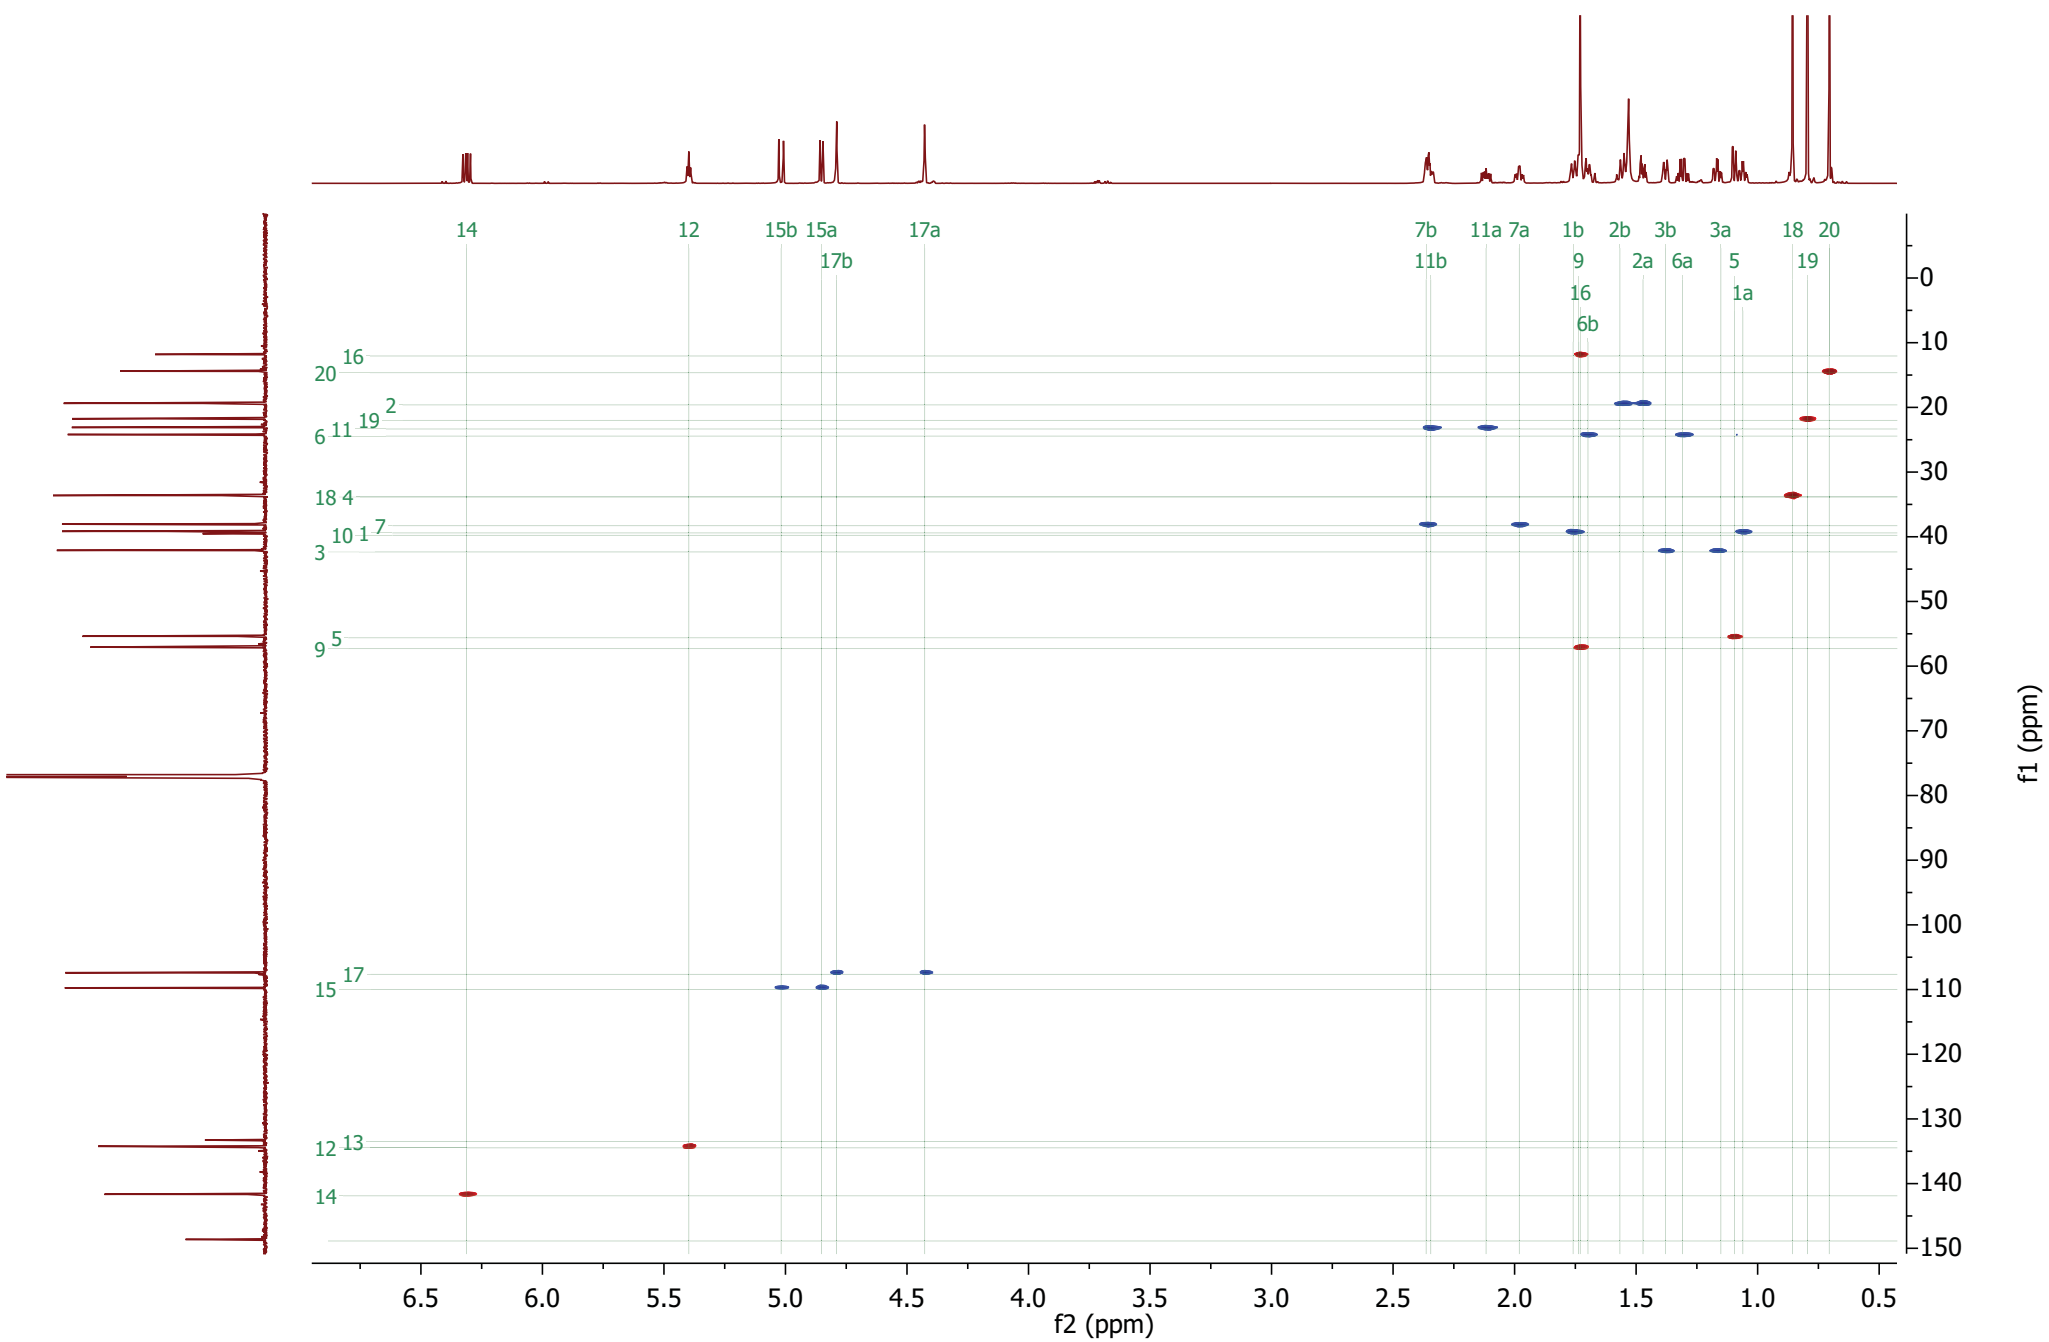

Figure S16-D.  $^1\text{H}$ - $^{13}\text{C}$  HSQC of trans-biformene [34].



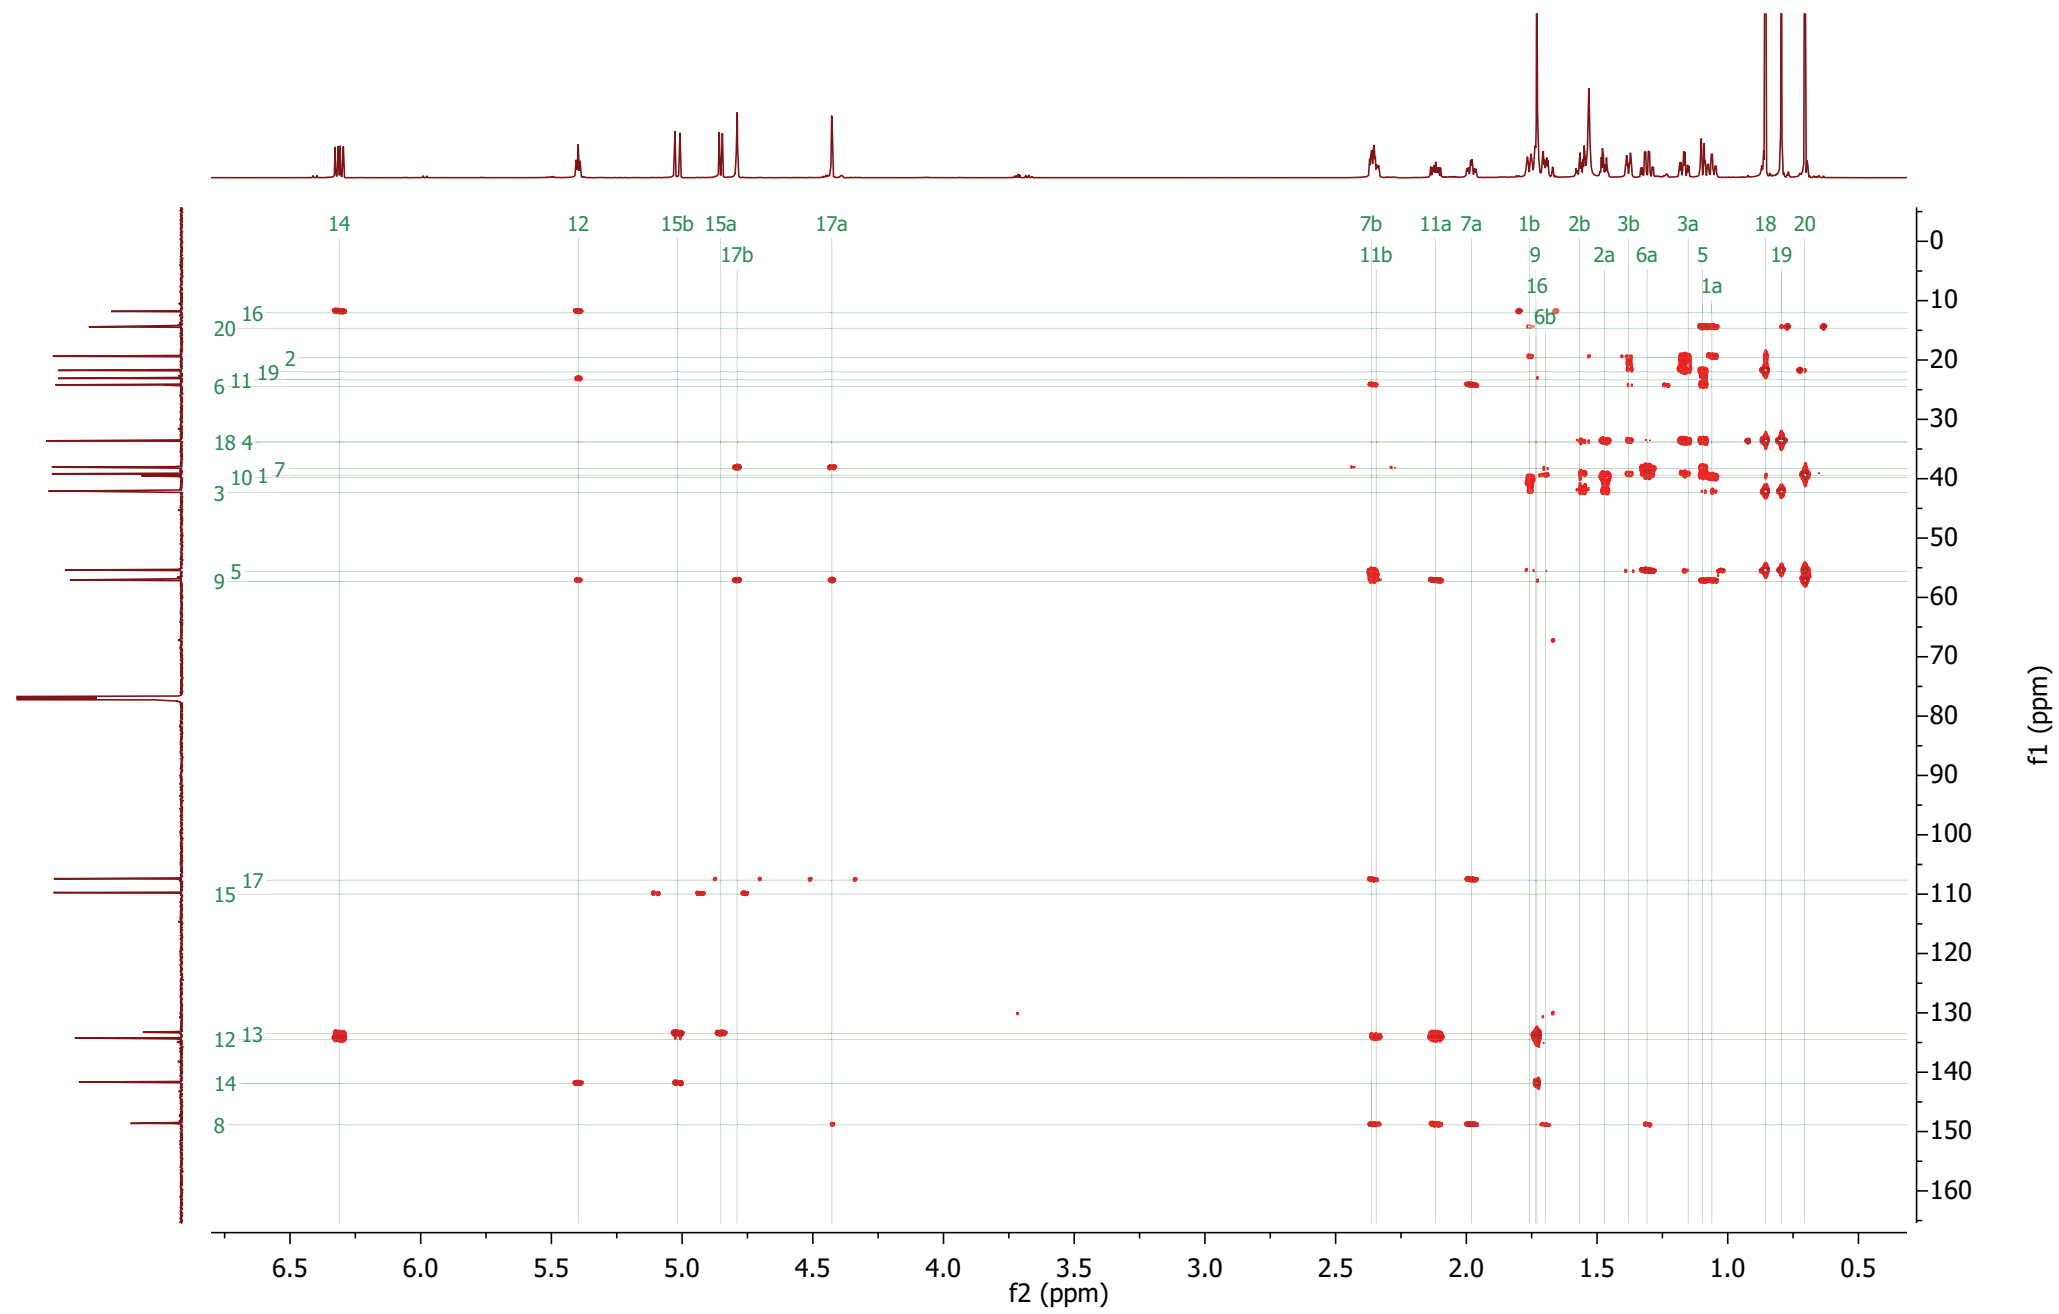

Figure S16-E.  $^1\text{H}$ - $^{13}\text{C}$  HMBC of trans-biformene [34].

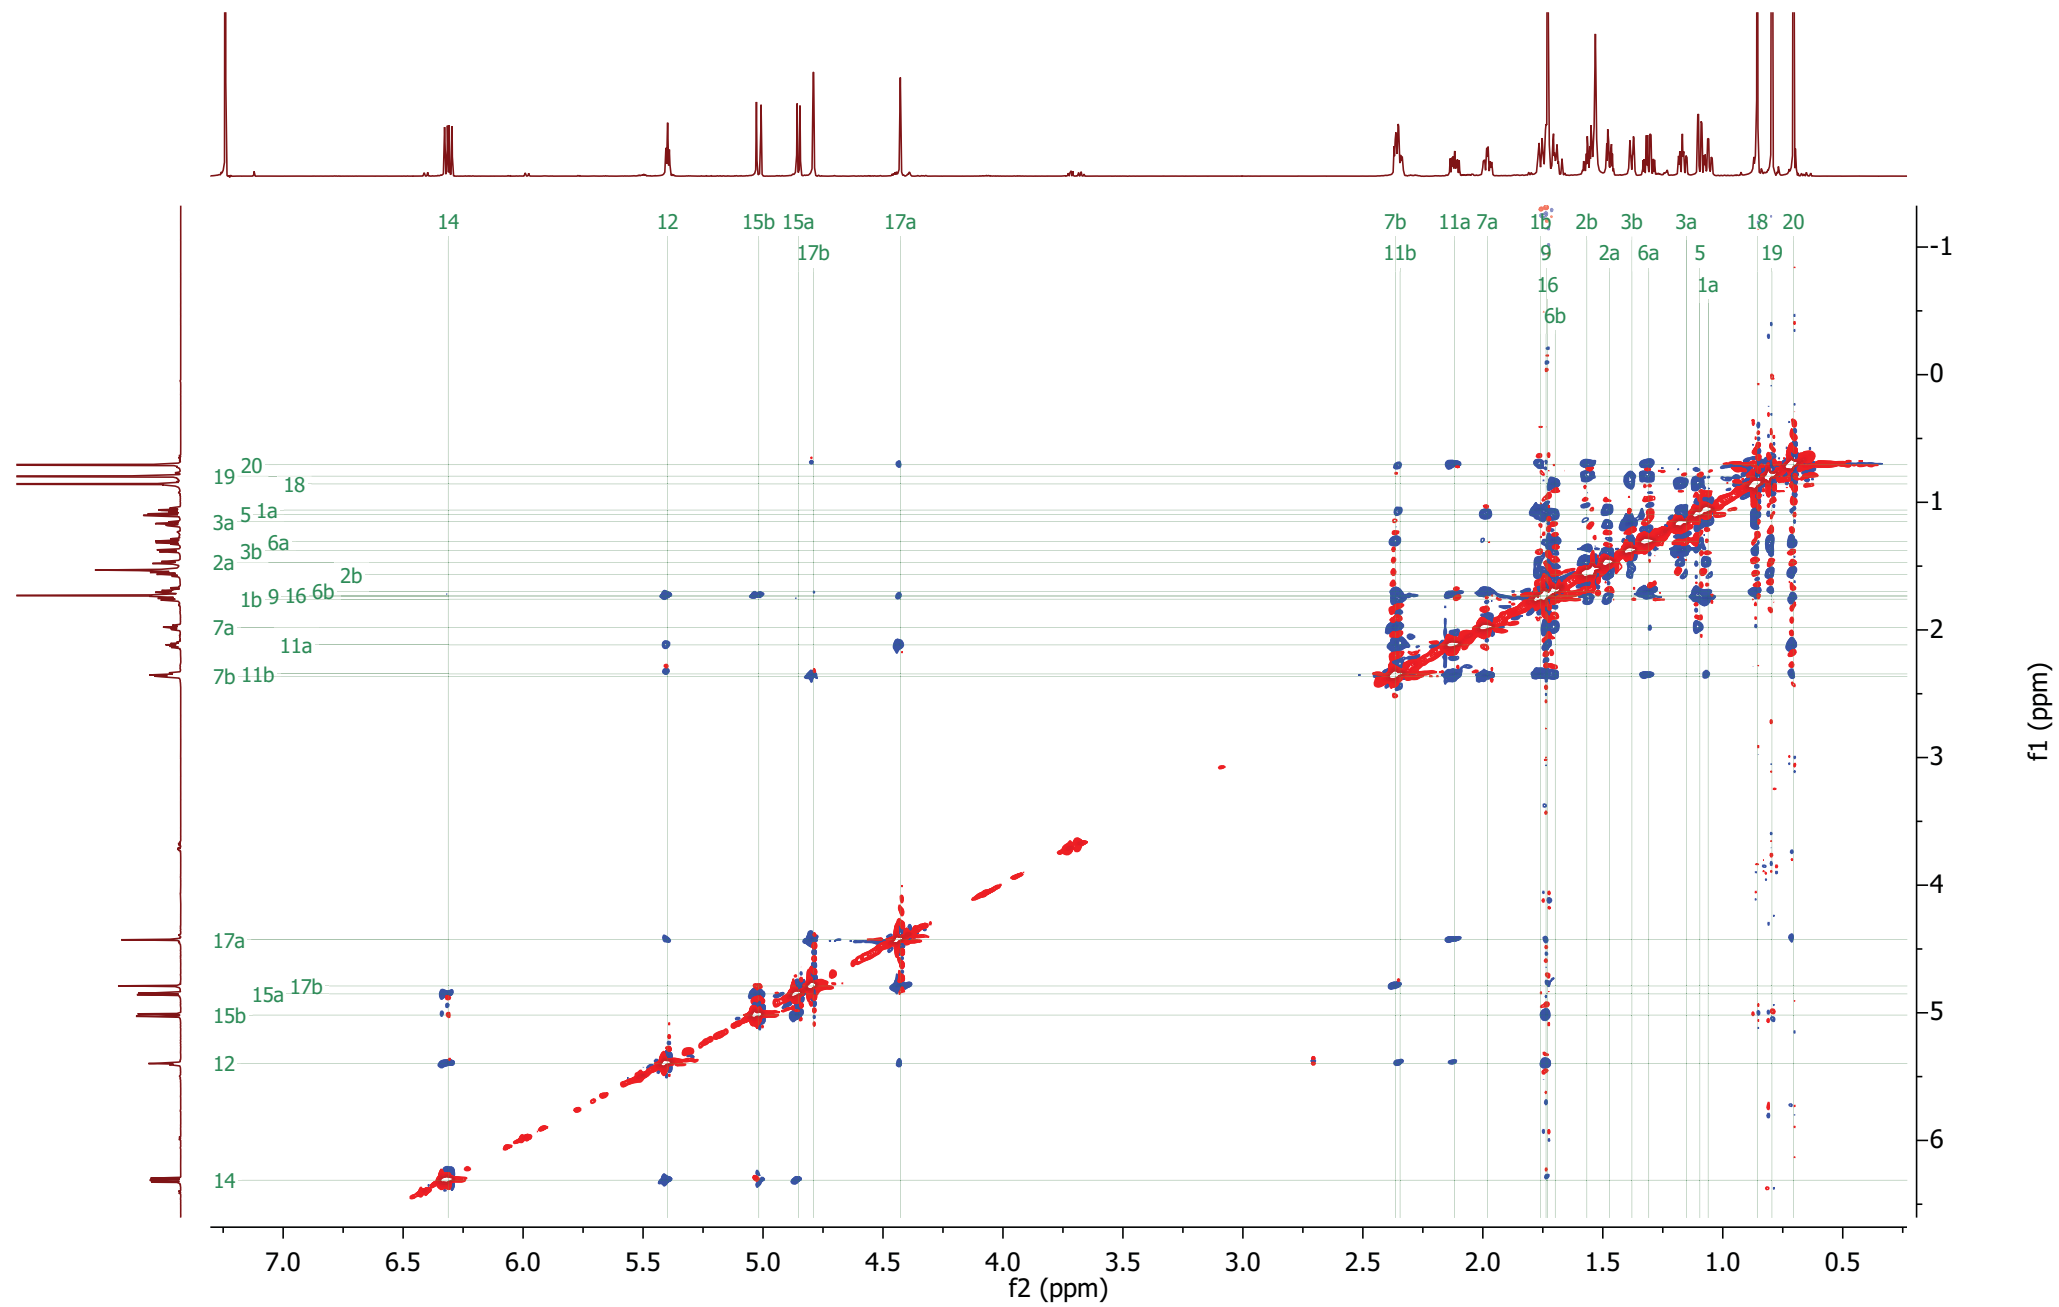

Figure S16-F.  $^1\text{H}$  NOESY of trans-biformene [34].

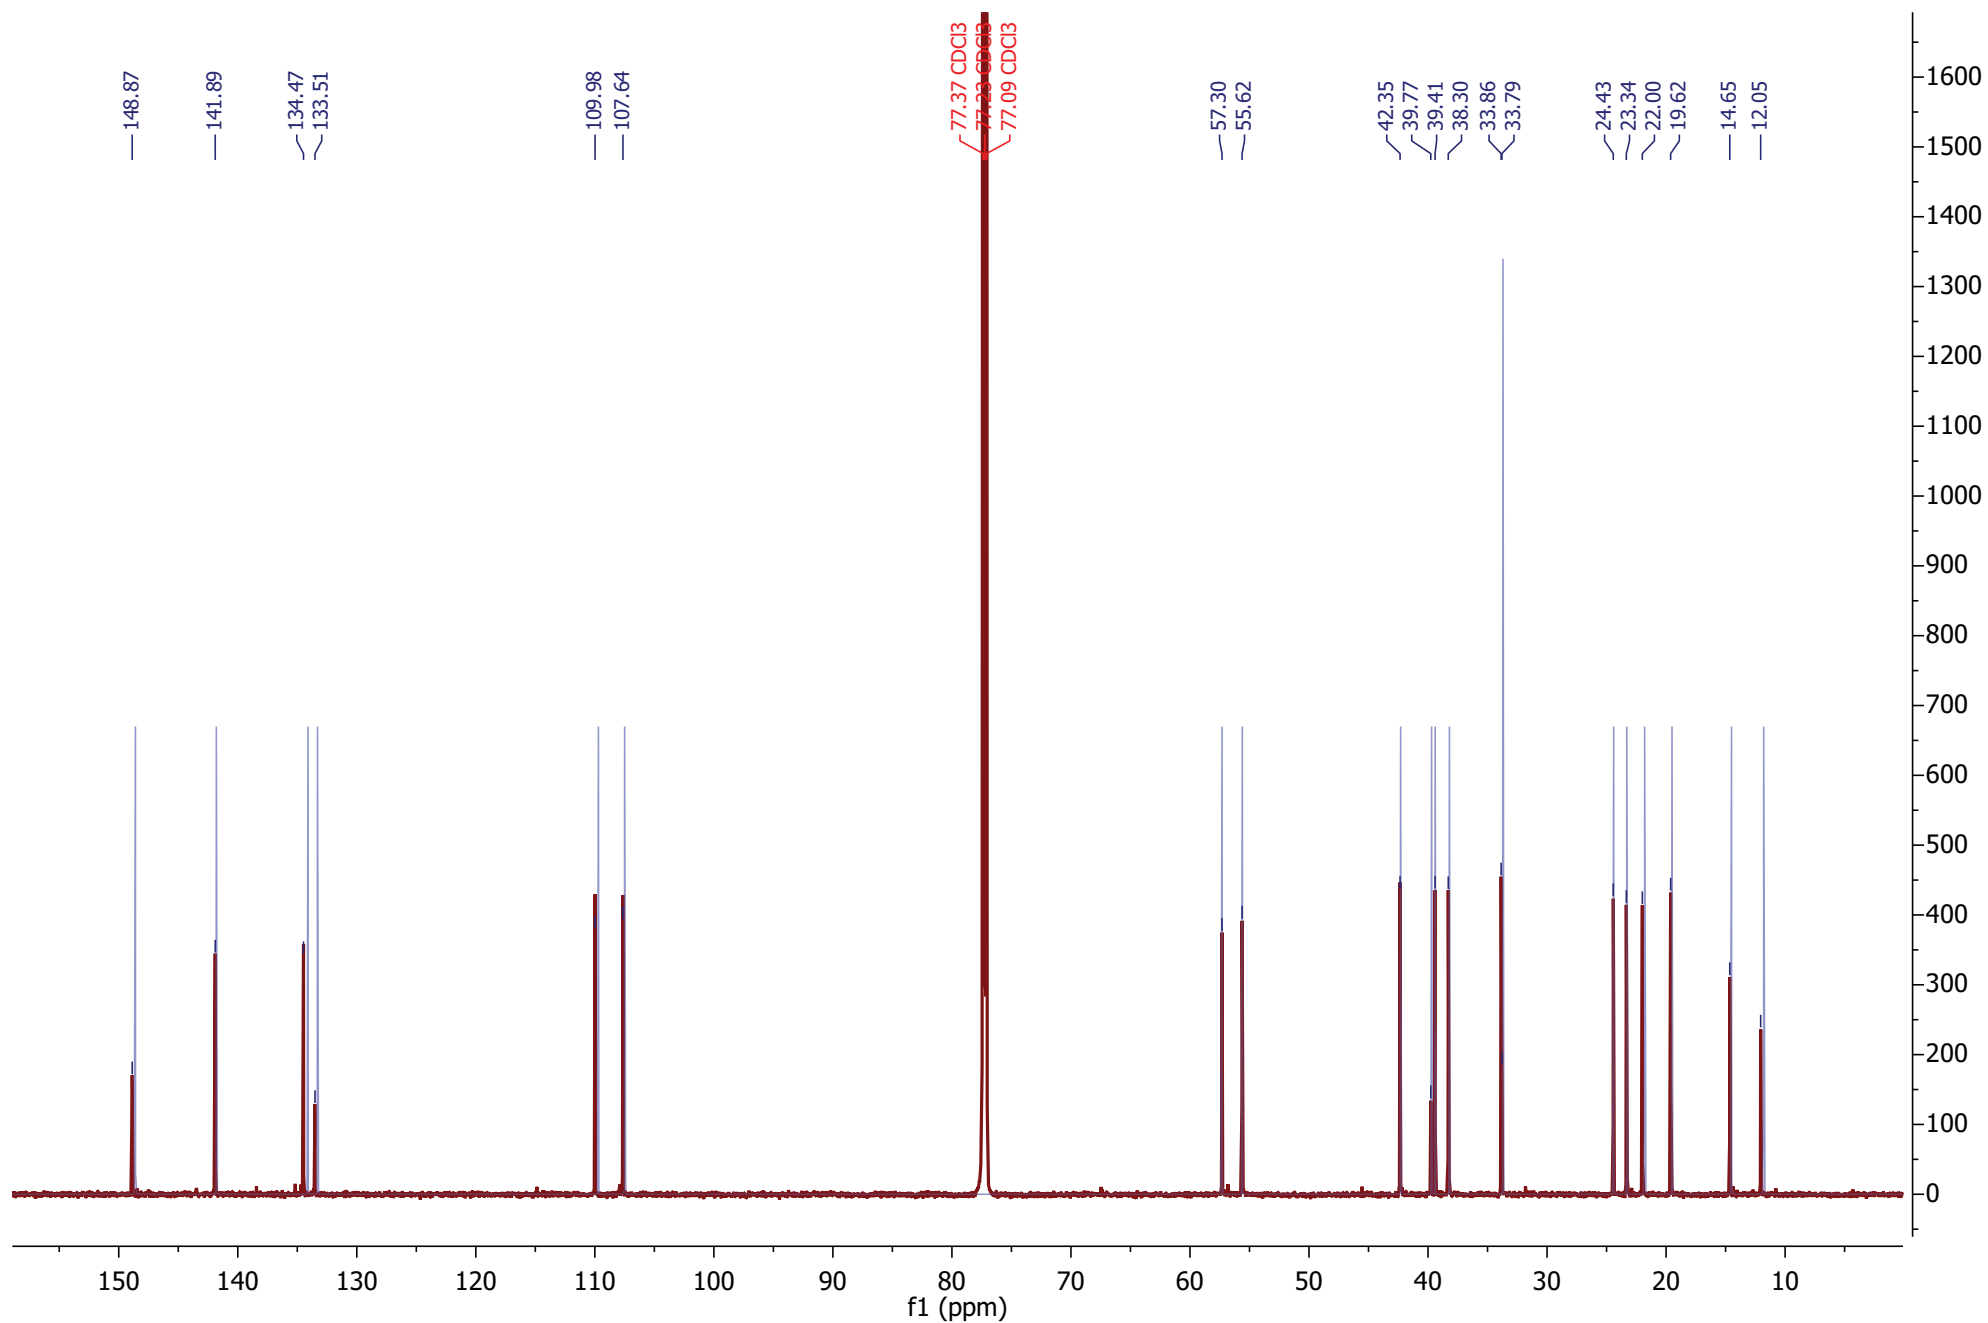

**Figure S16-G.** Overlay of  $^{13}\text{C}$  NMR of trans-biformene [34] (red) with  $^{13}\text{C}$  NMR spectrum (blue) reconstructed from shifts reported for the same compound by Bohlmann and Czerson (1979) (DOI: 10.1016/S0031-9422(00)90926-9).

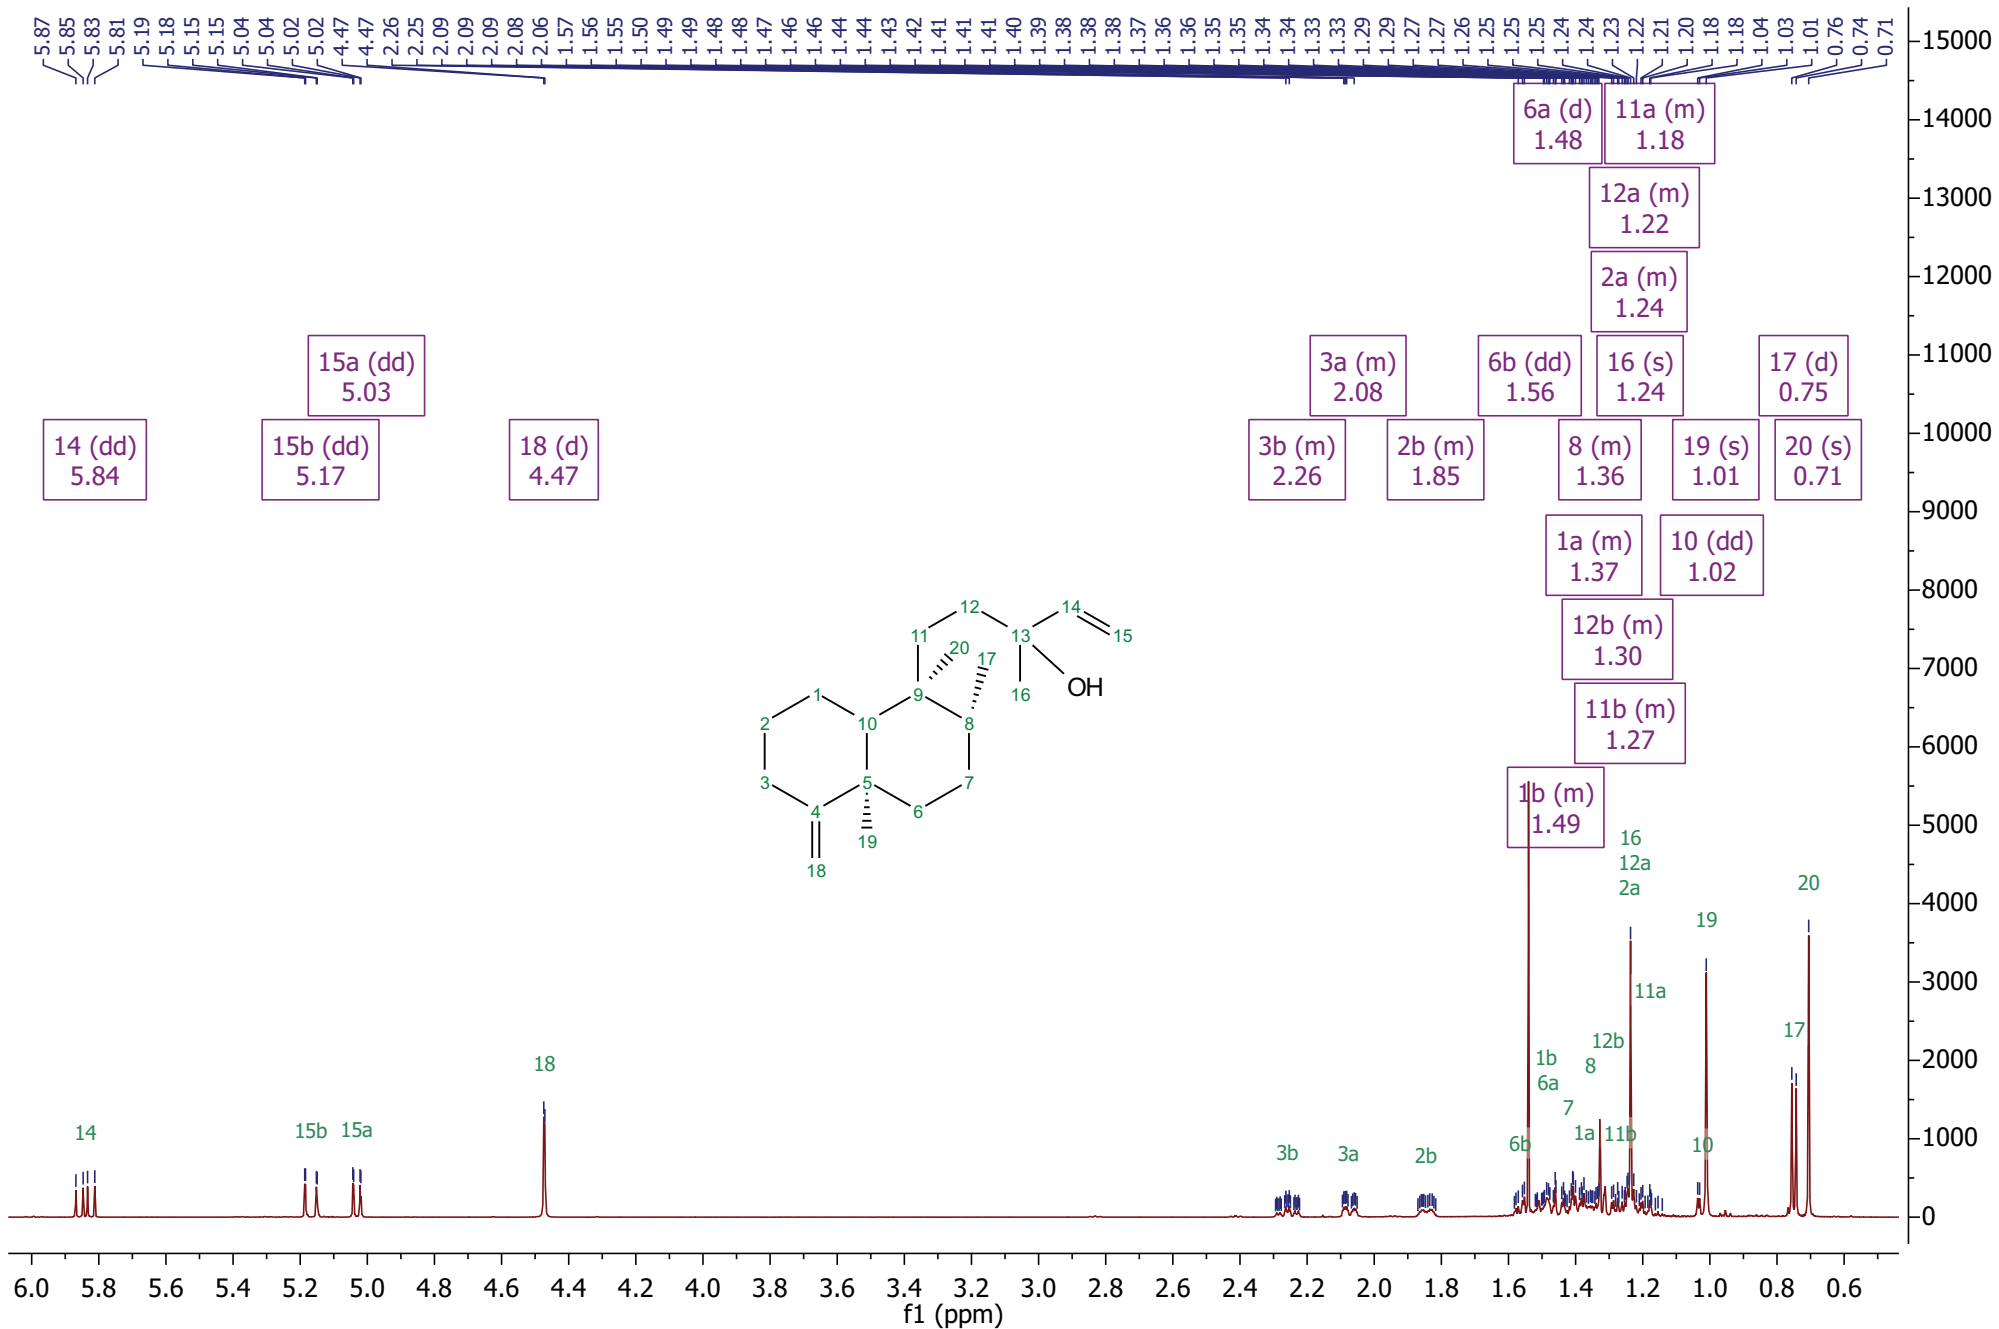

Figure S17-A. <sup>1</sup>H NMR of neo-cleroda-4(18),14-dien-13-ol [37].

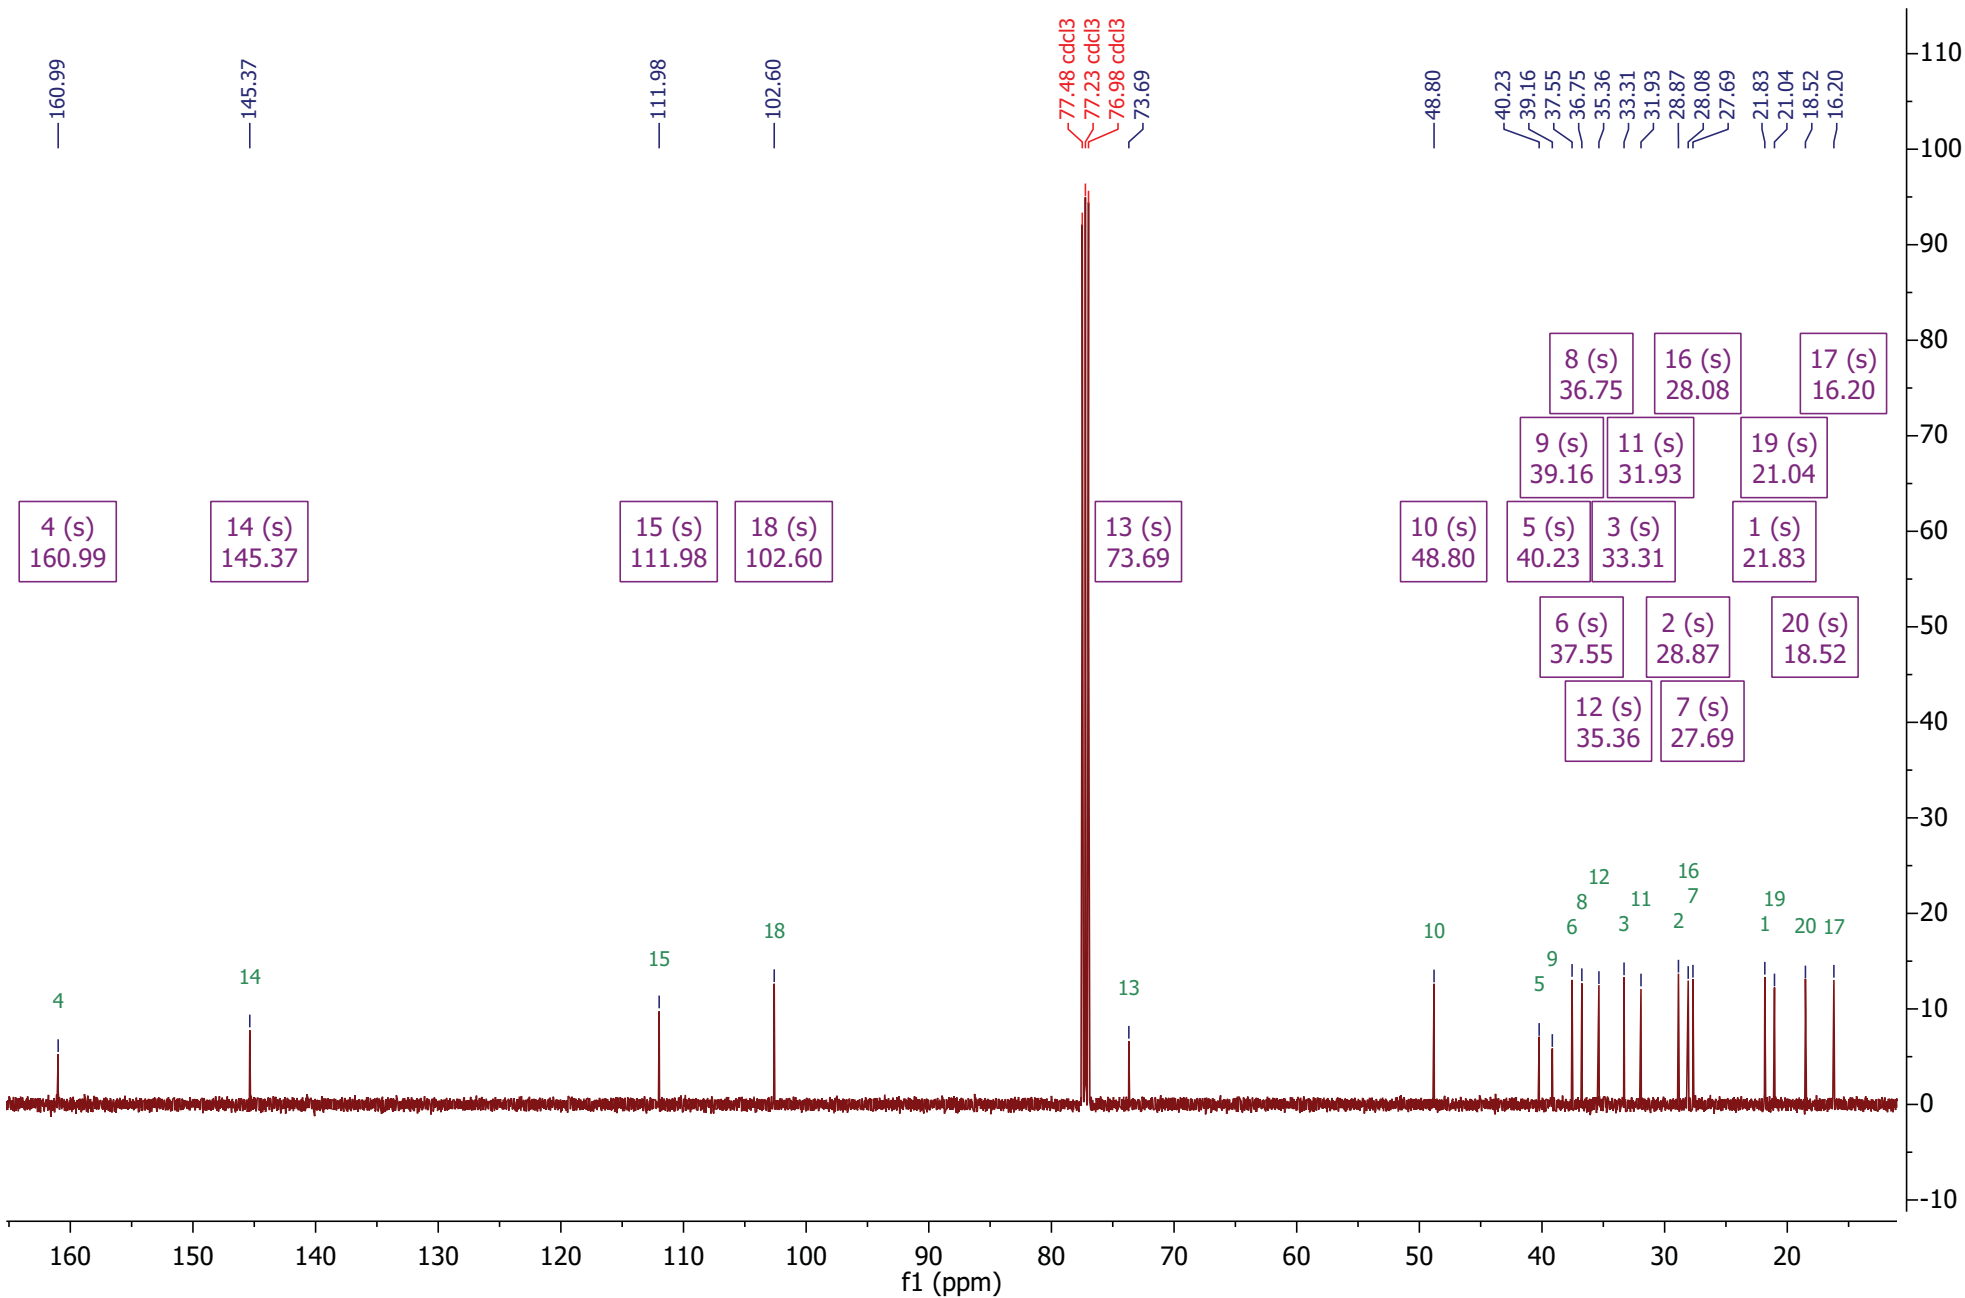

Figure S17-B.  $^{13}\text{C}$  NMR of neo-cleroda-4(18),14-dien-13-ol [37].

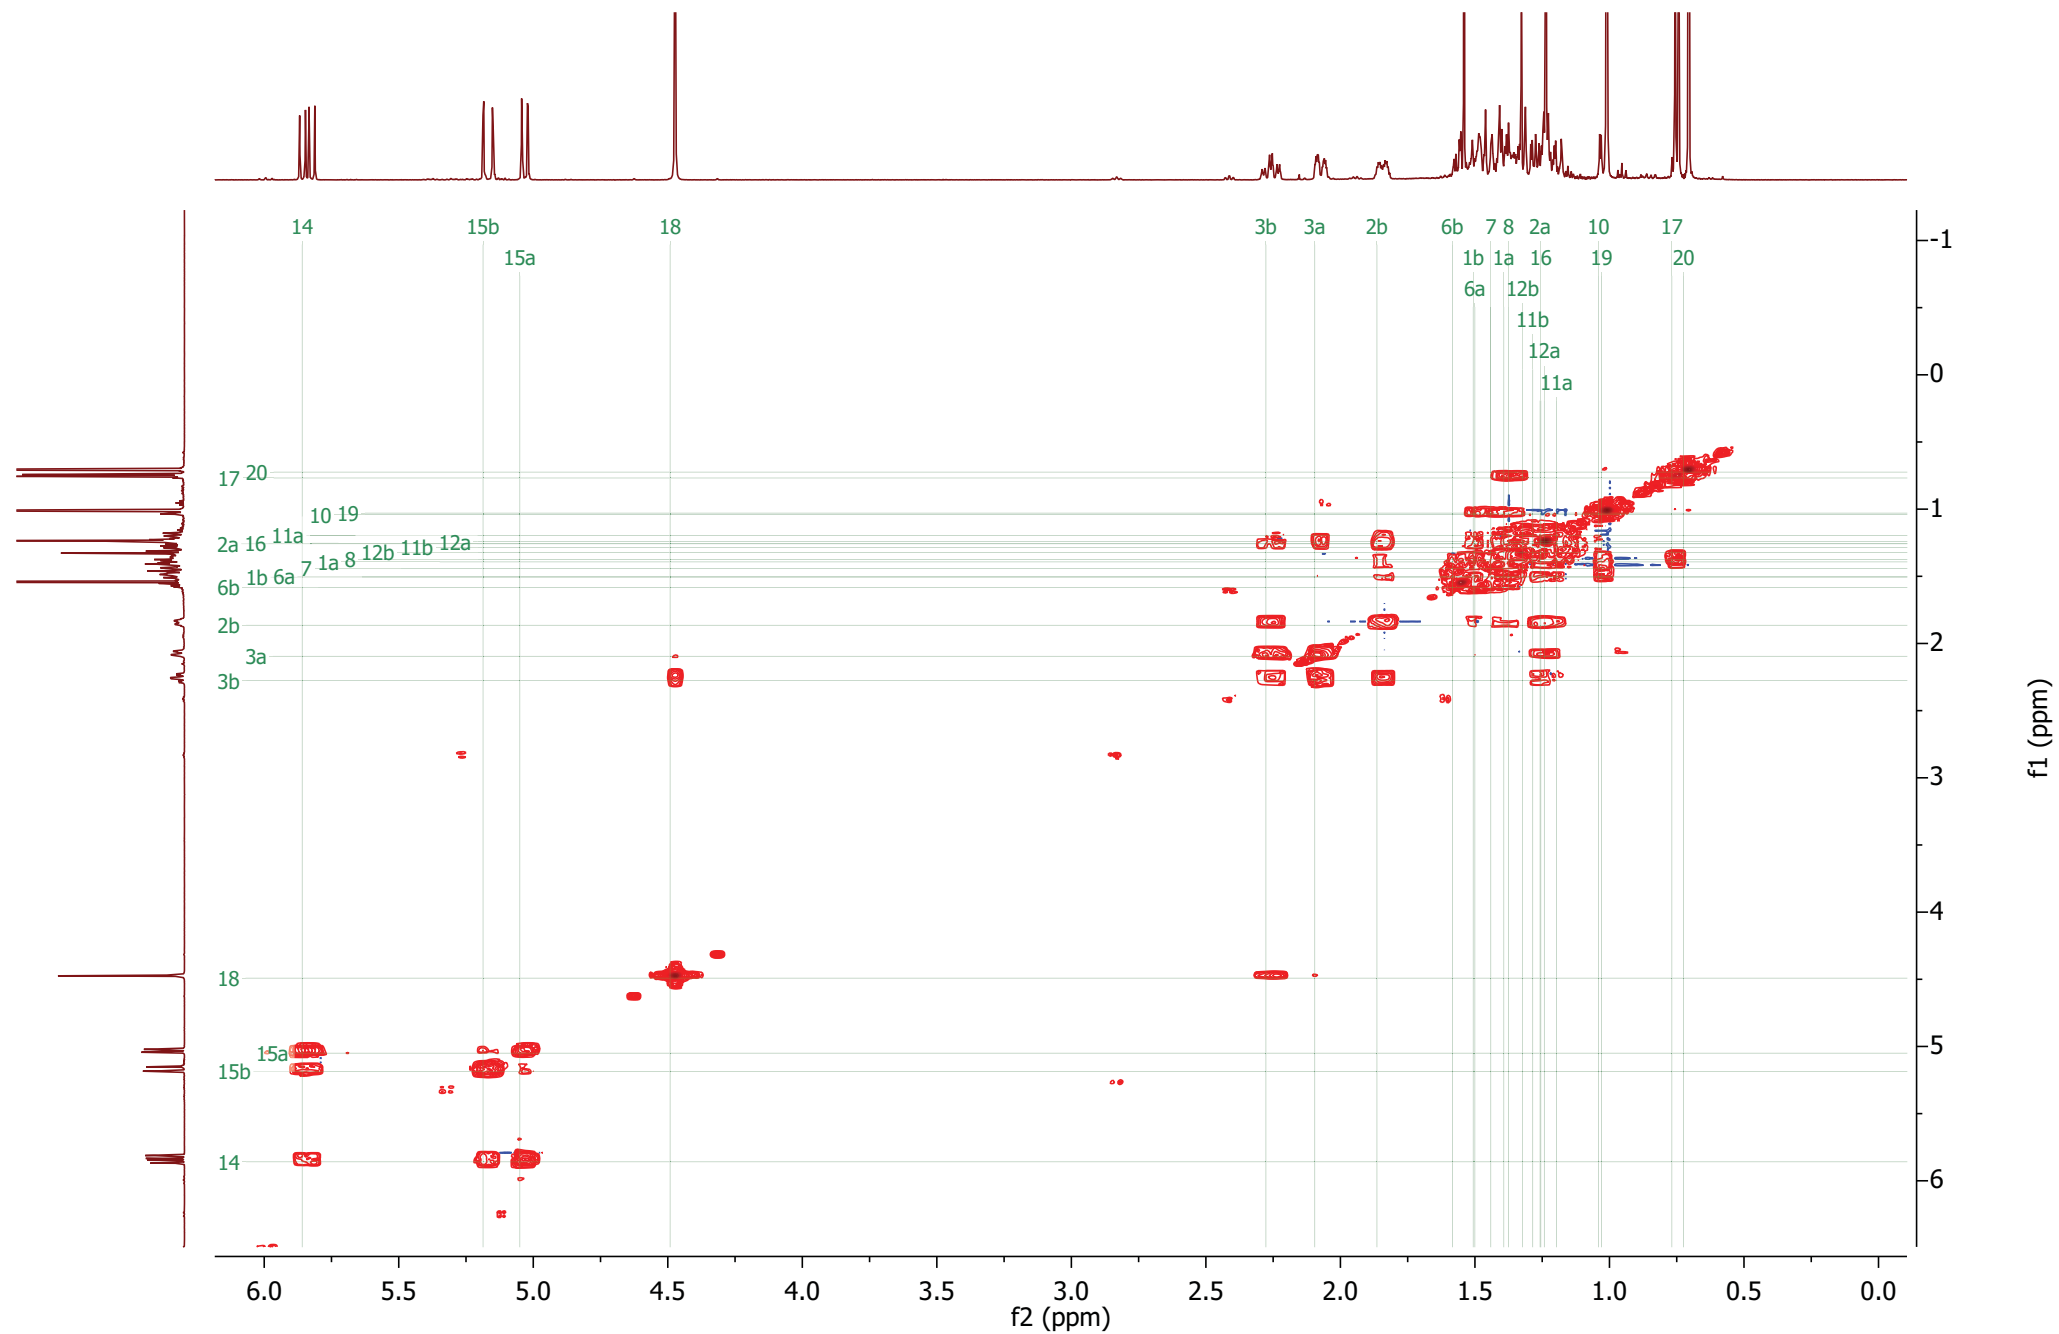

Figure S17-C.  $^1\text{H}$ - $^1\text{H}$  COSY of neo-cleroda-4(18),14-dien-13-ol [37].

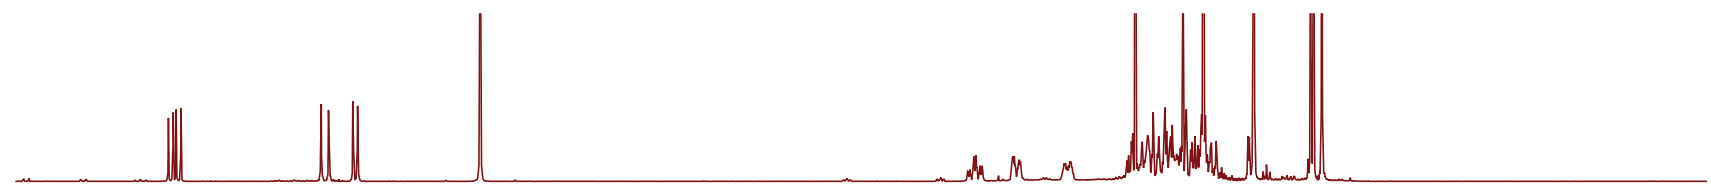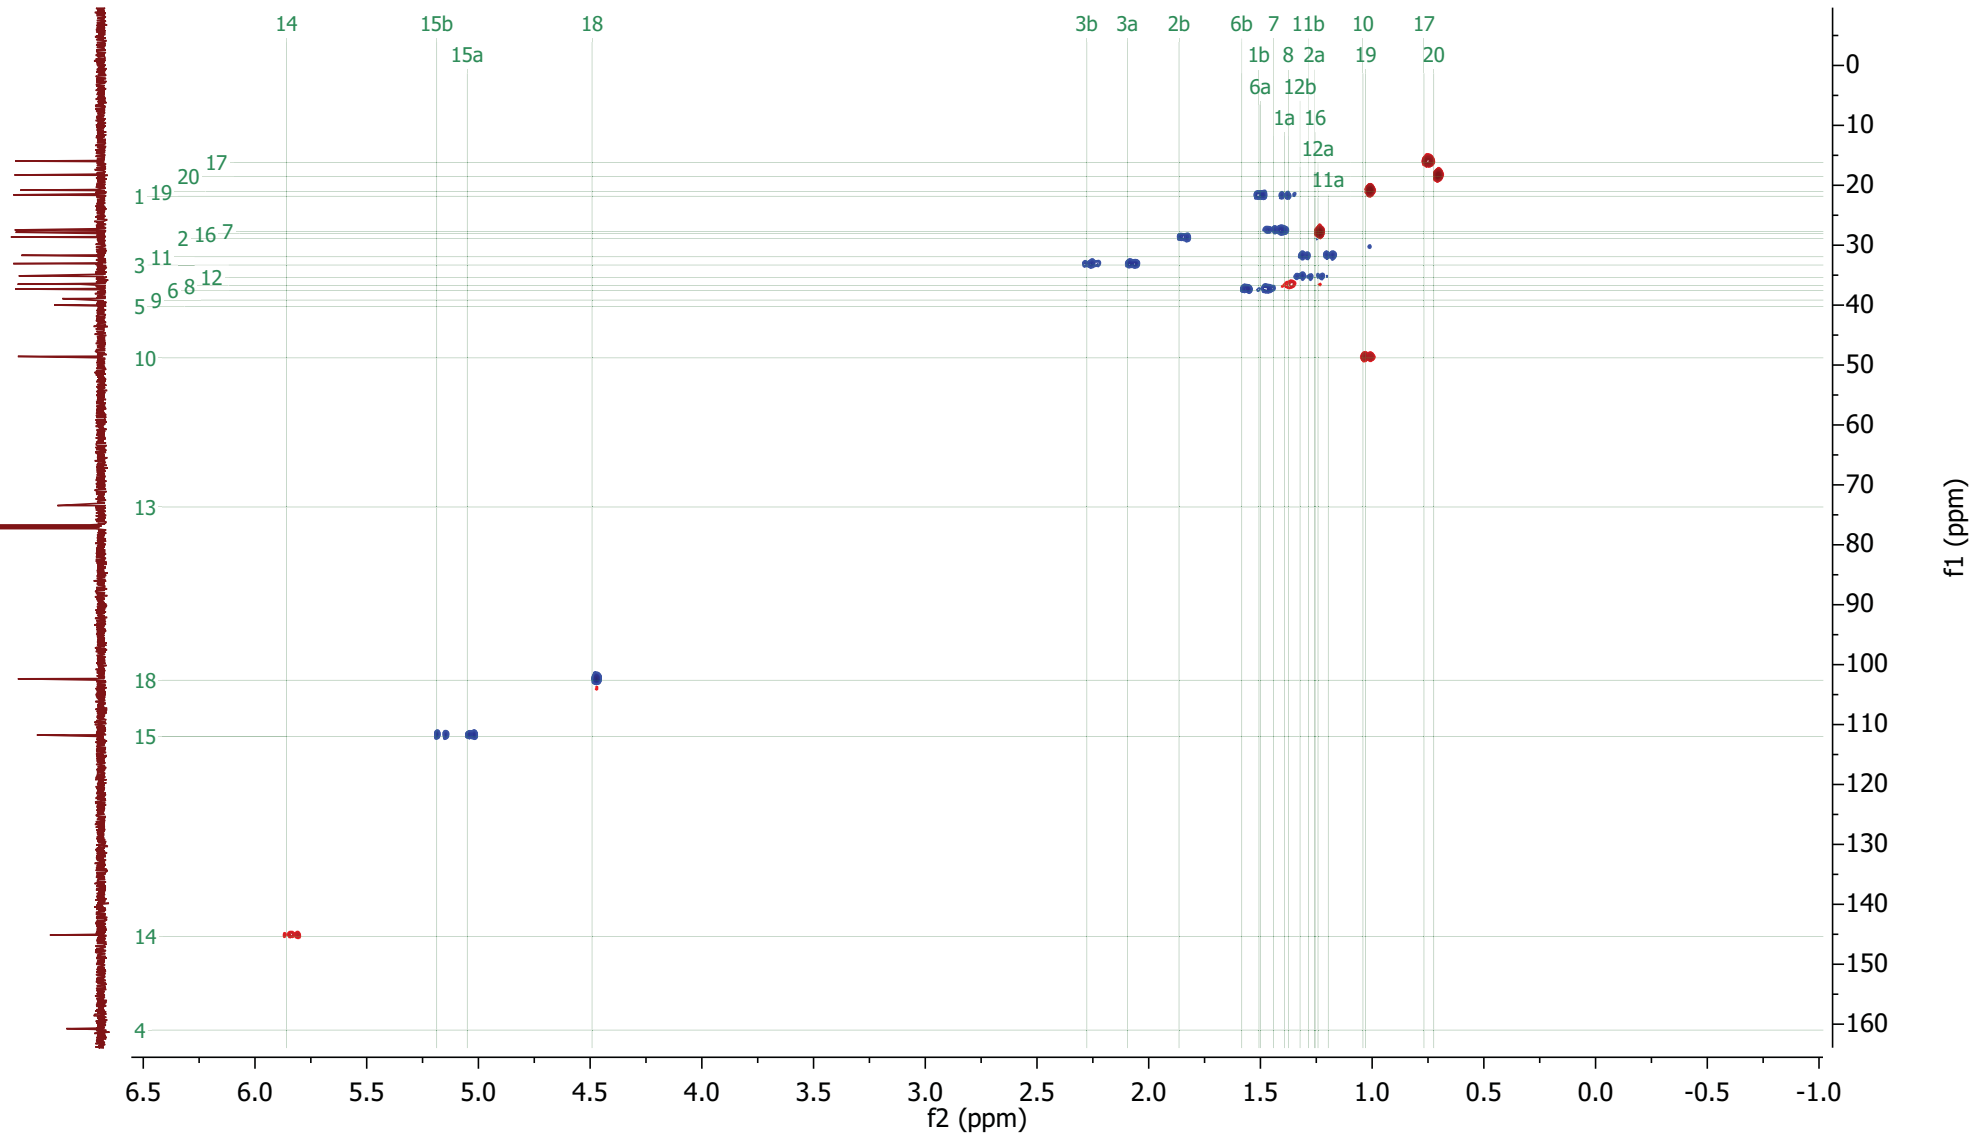

Figure S17-D.  $^1\text{H}$ - $^{13}\text{C}$  HSQC of neo-cleroda-4(18),14-dien-13-ol [37].

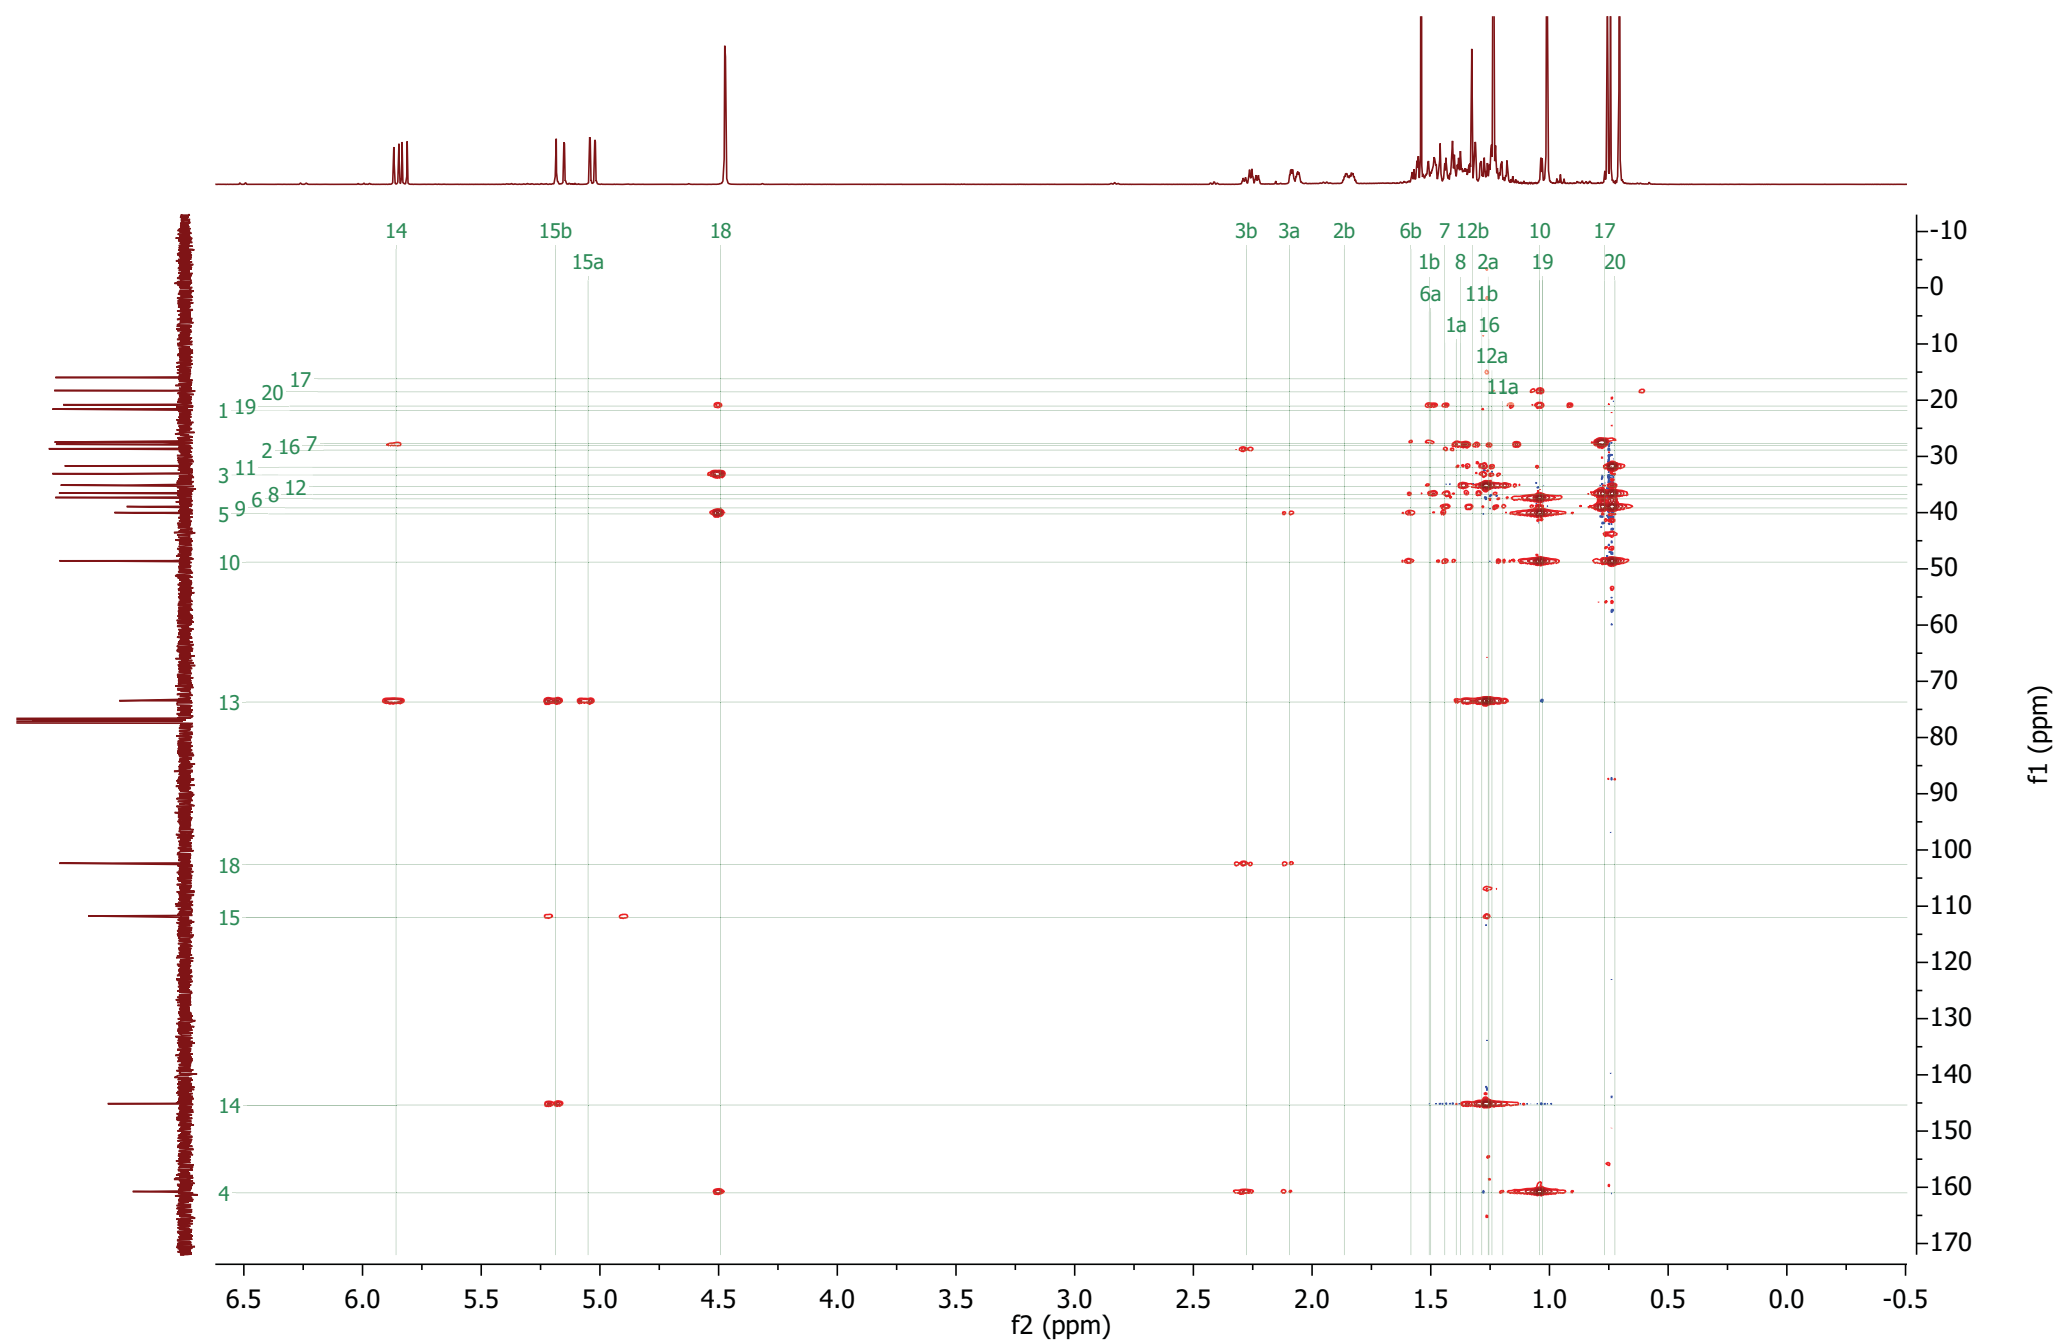



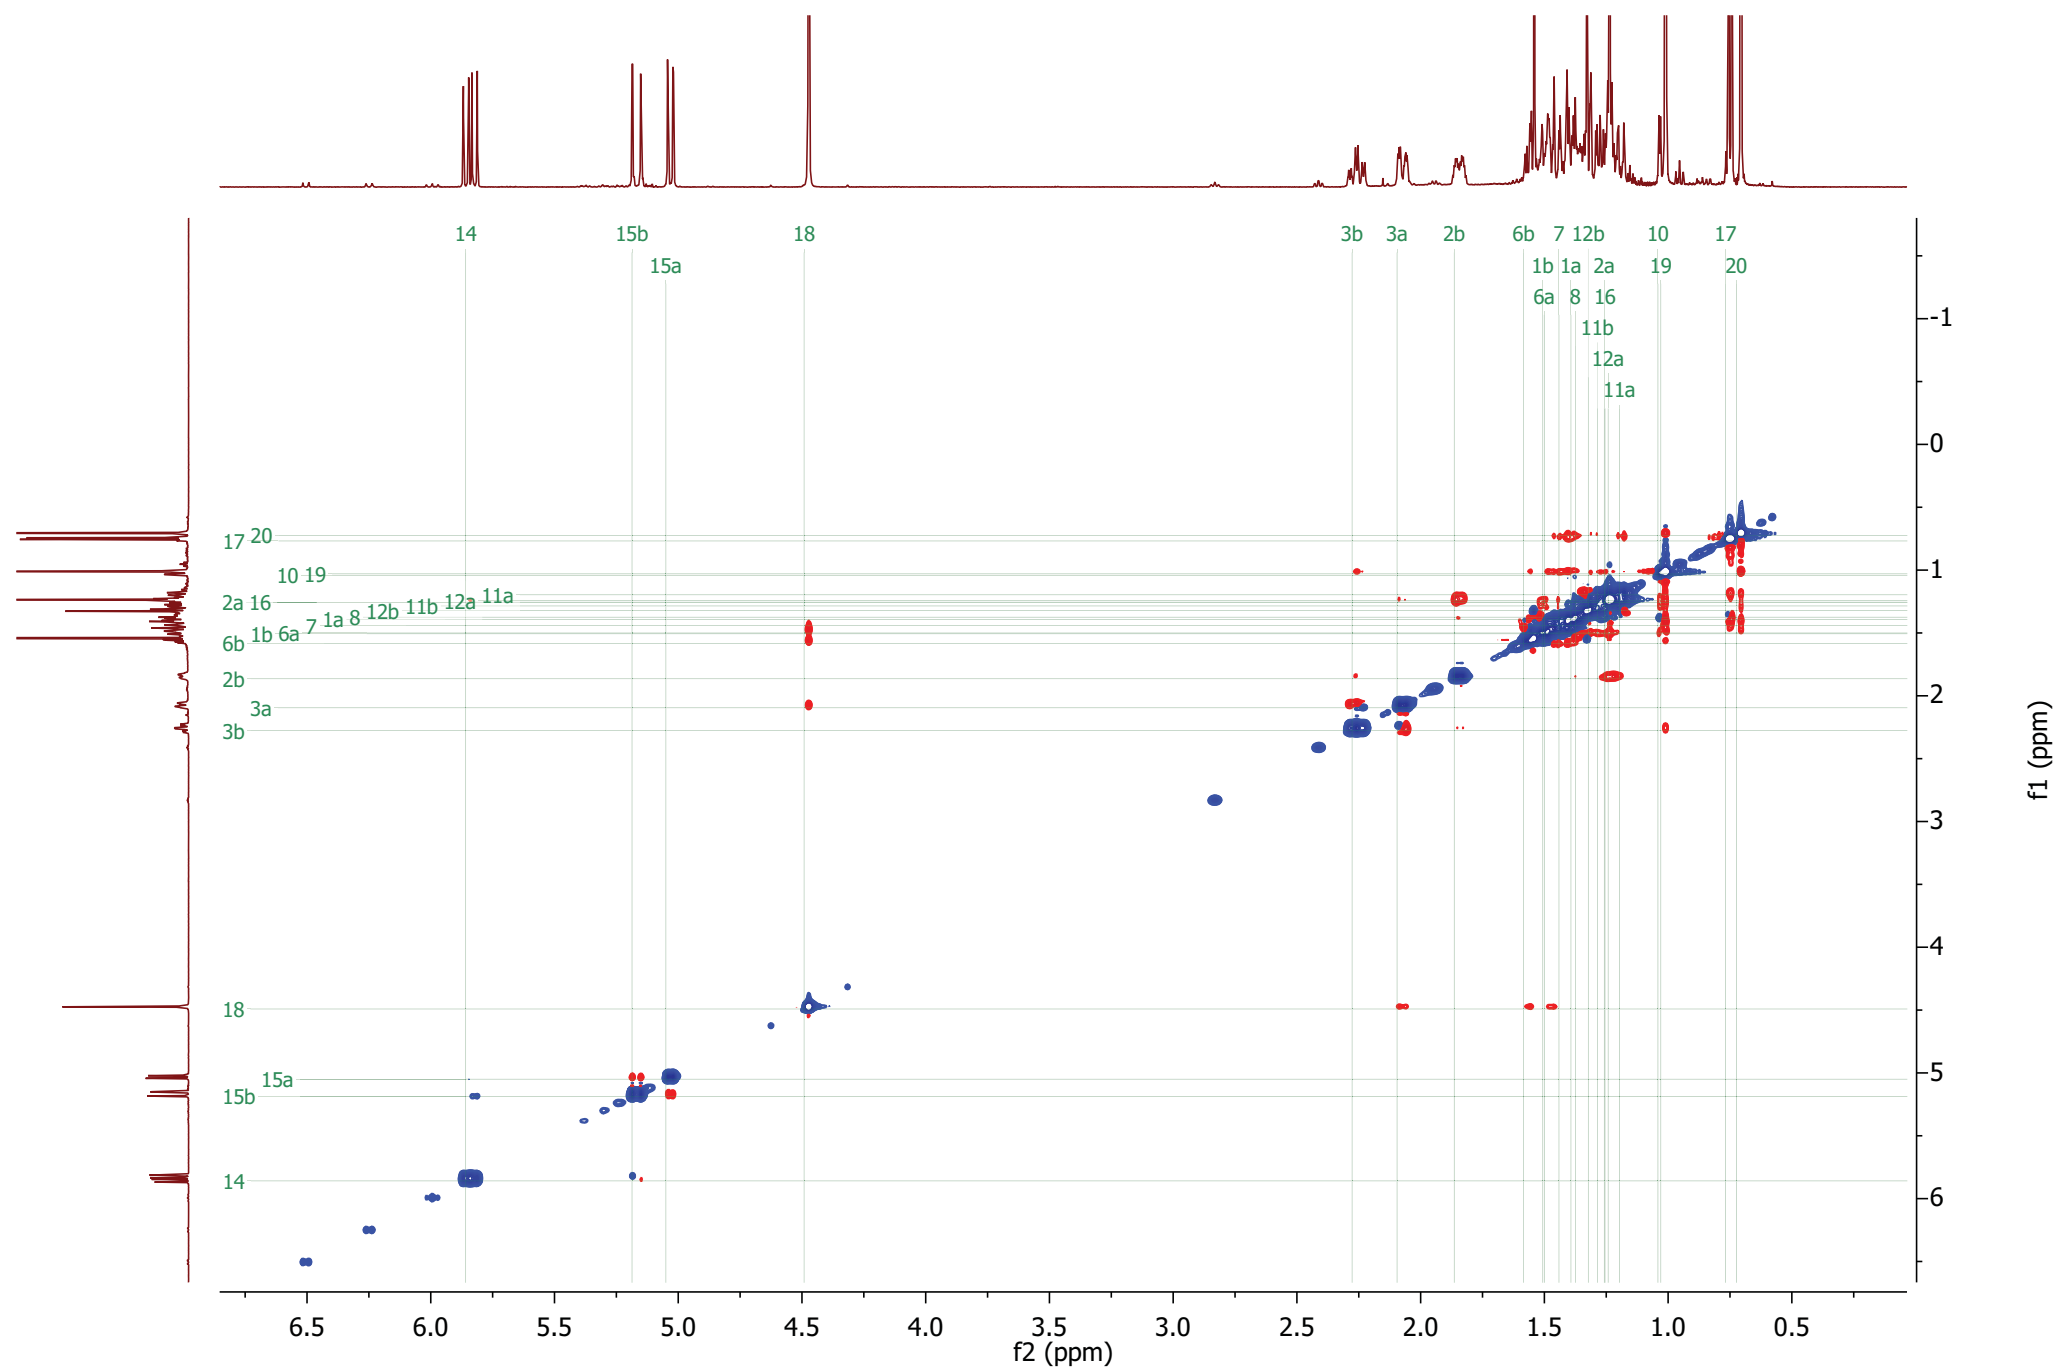

Figure S17-F.  $^1\text{H}$  NOESY of neo-cleroda-4(18),14-dien-13-ol [37].

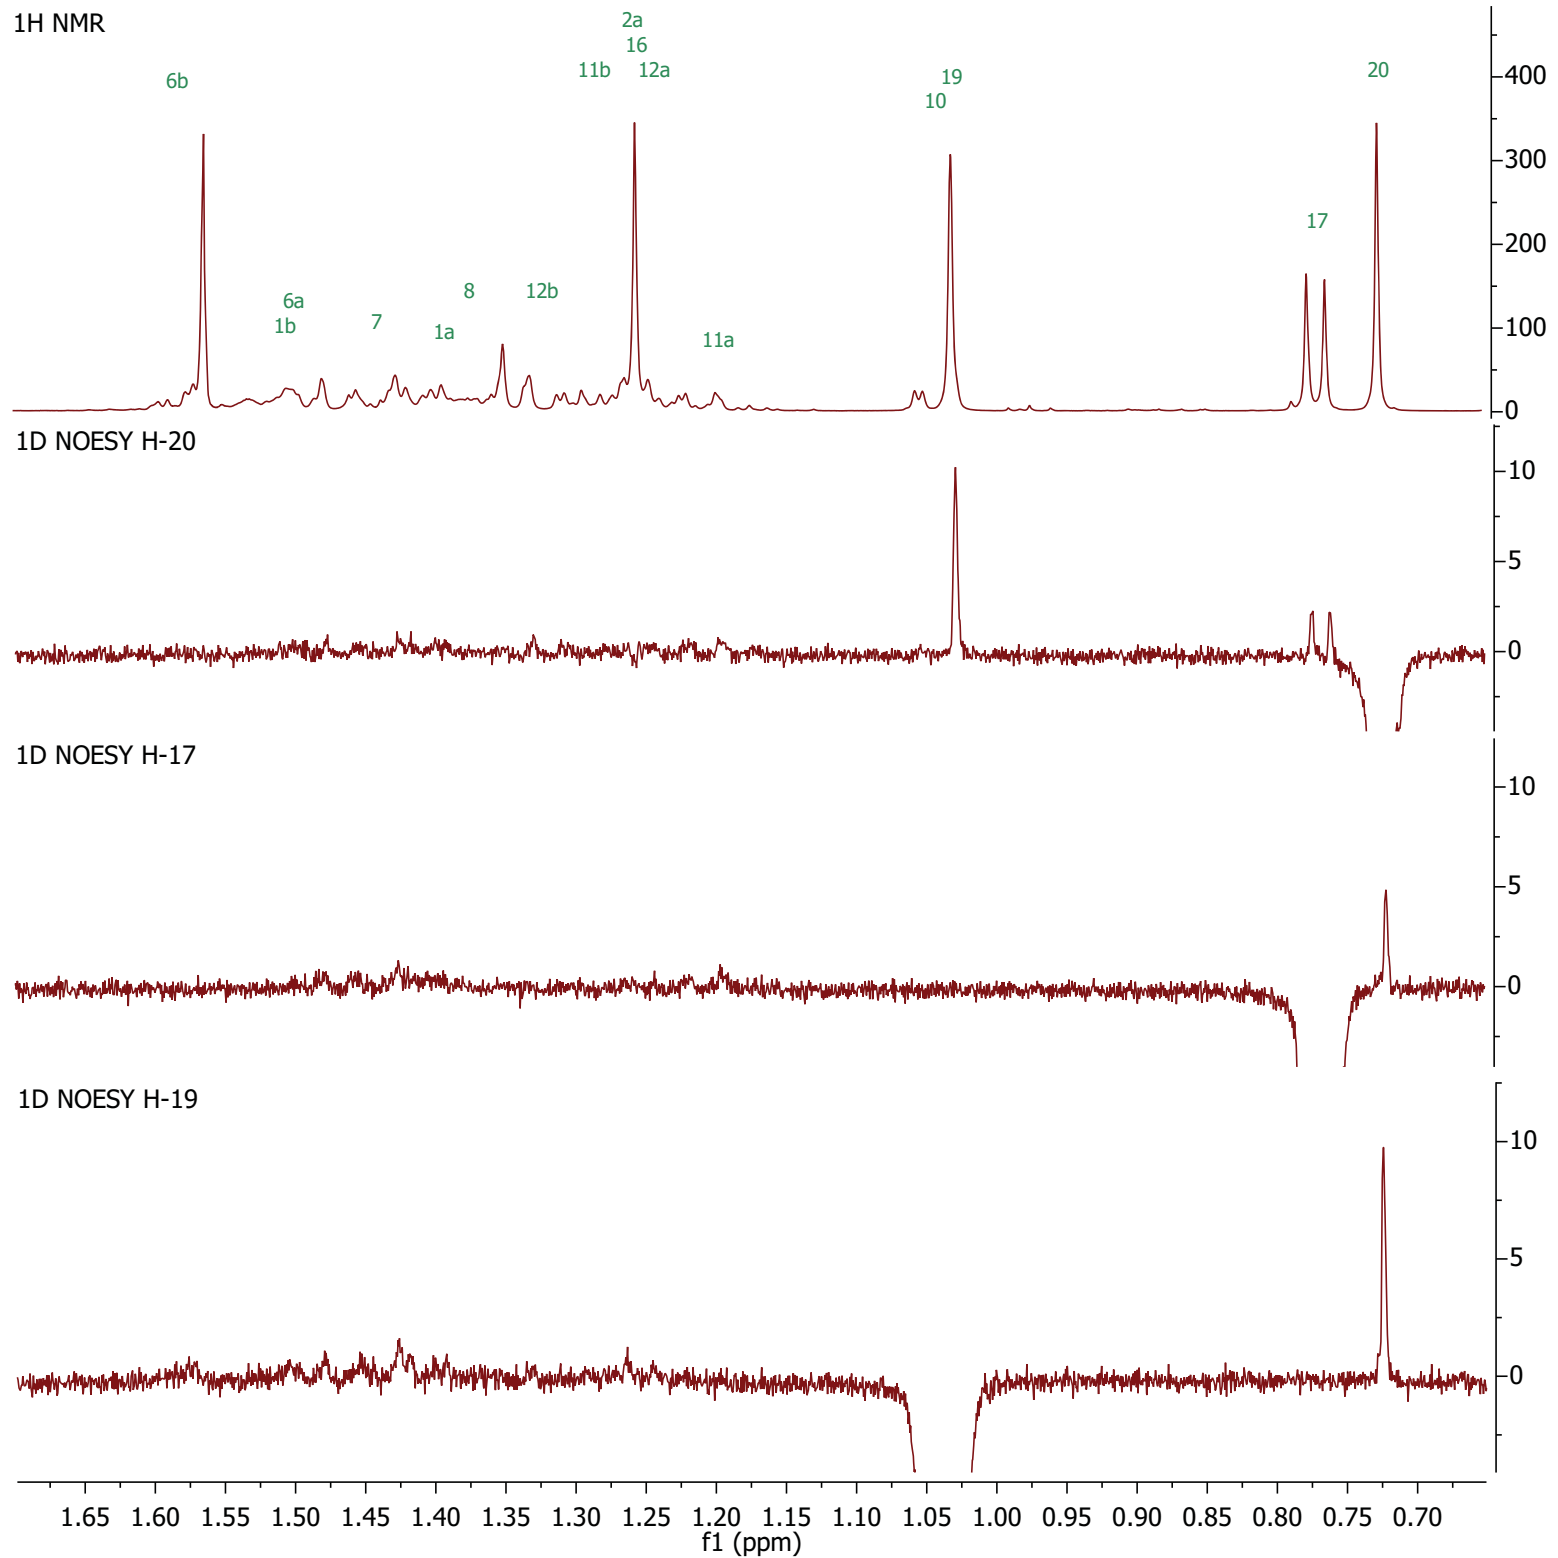

**Figure S17-G.**  $^1\text{H}$  1D-NOESY of neo-cleroda-4(18),14-dien-13-ol [37].

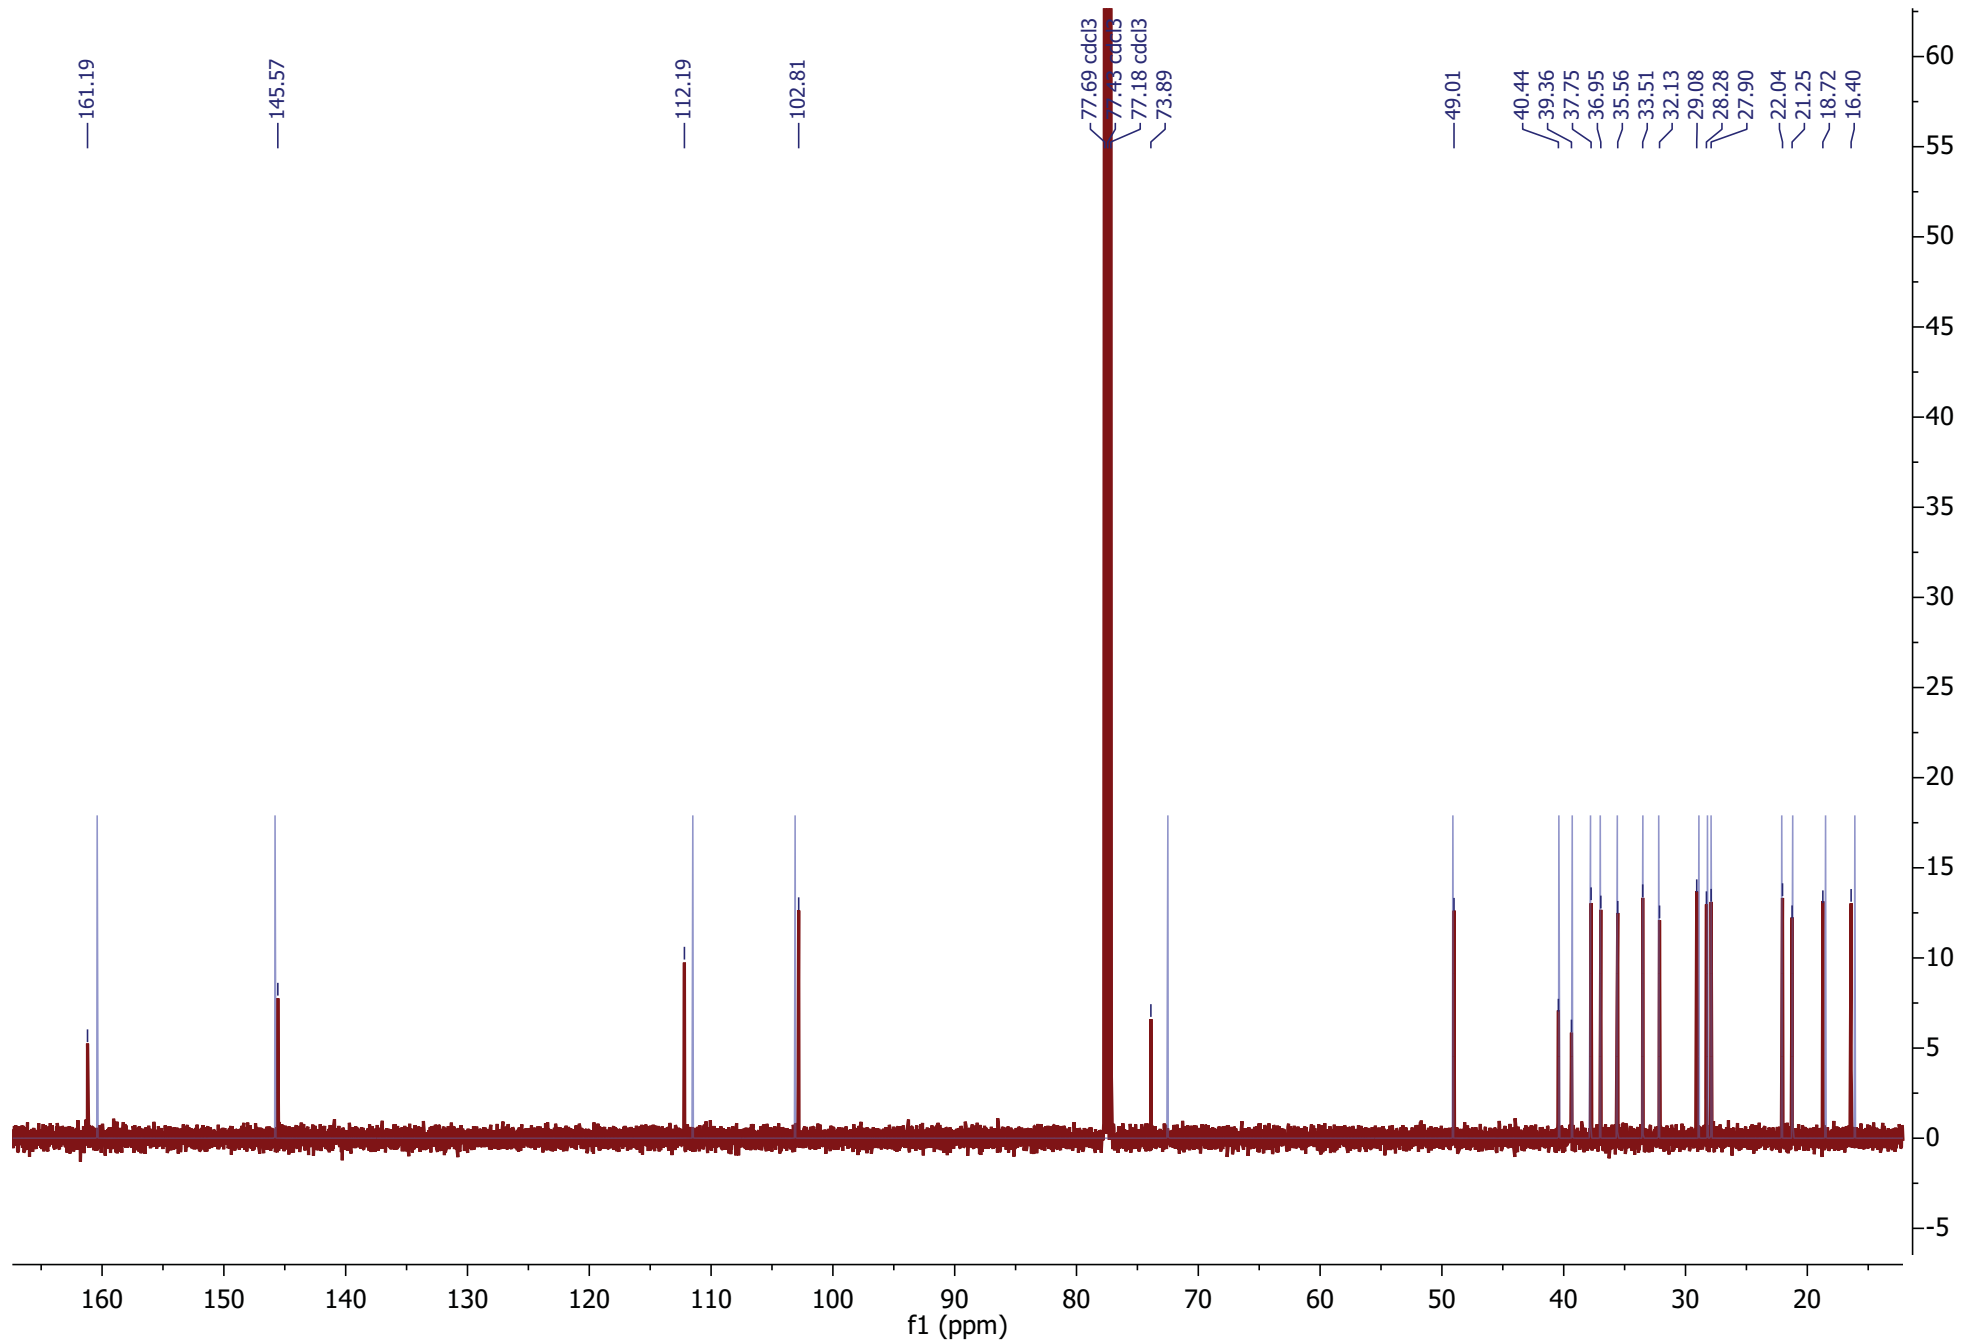

**Figure S17-H.** Overlay of  $^{13}\text{C}$  NMR of neo-cleroda-4(18),14-dien-13-ol [37] (red) with  $^{13}\text{C}$  NMR spectrum (blue) reconstructed from shifts reported for the same compound by Rudi and Kashman (1992) (DOI: 10.1021/np50088a004).

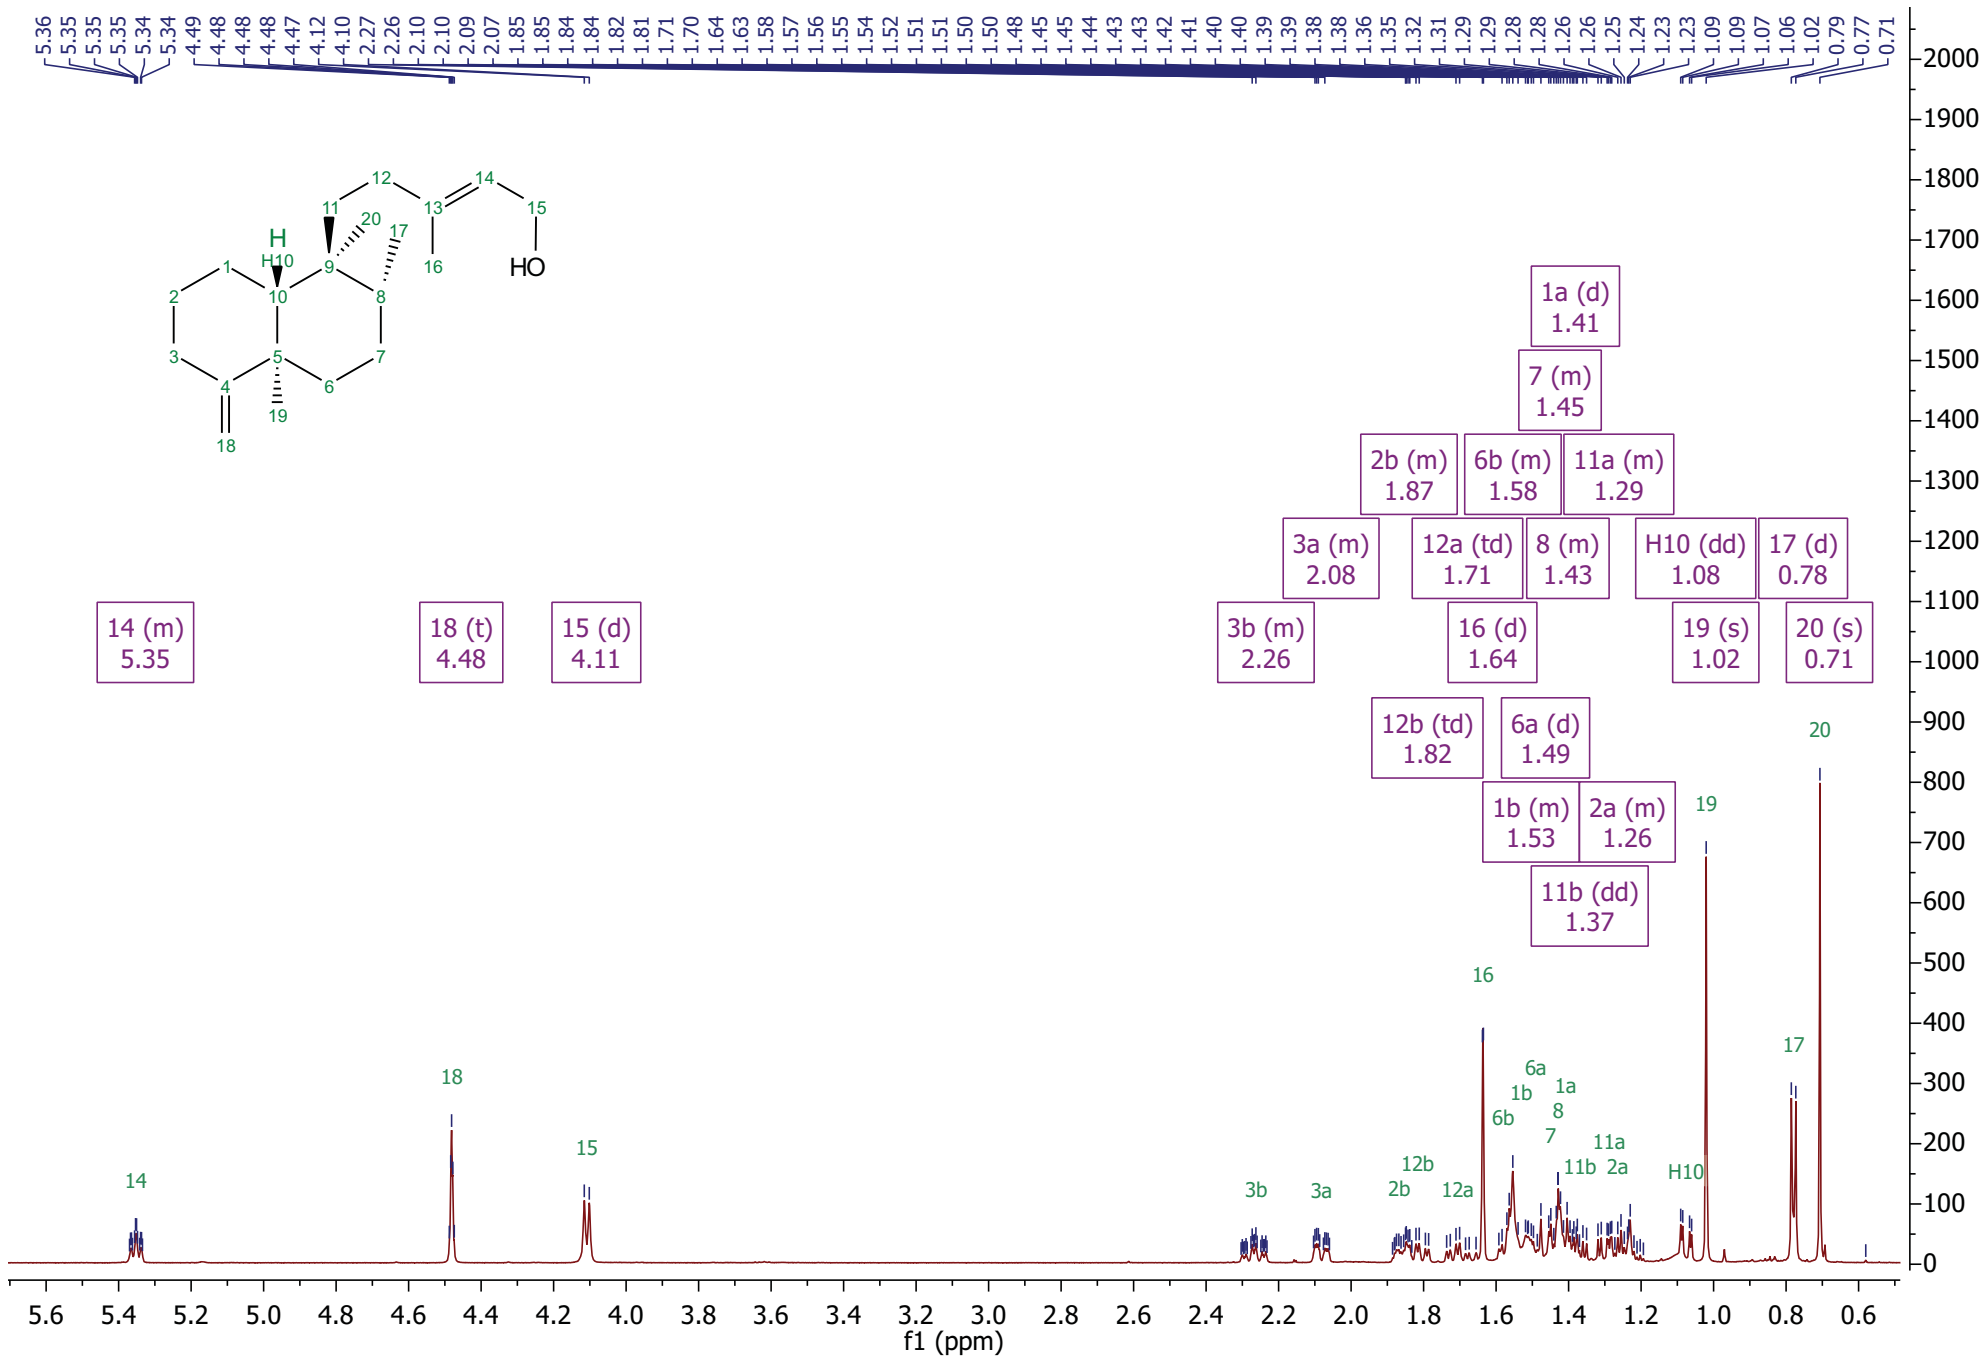

Figure S18-A.  $^1\text{H}$  NMR of neo-cleroda-4(18),13E-diene-15-ol [38a].

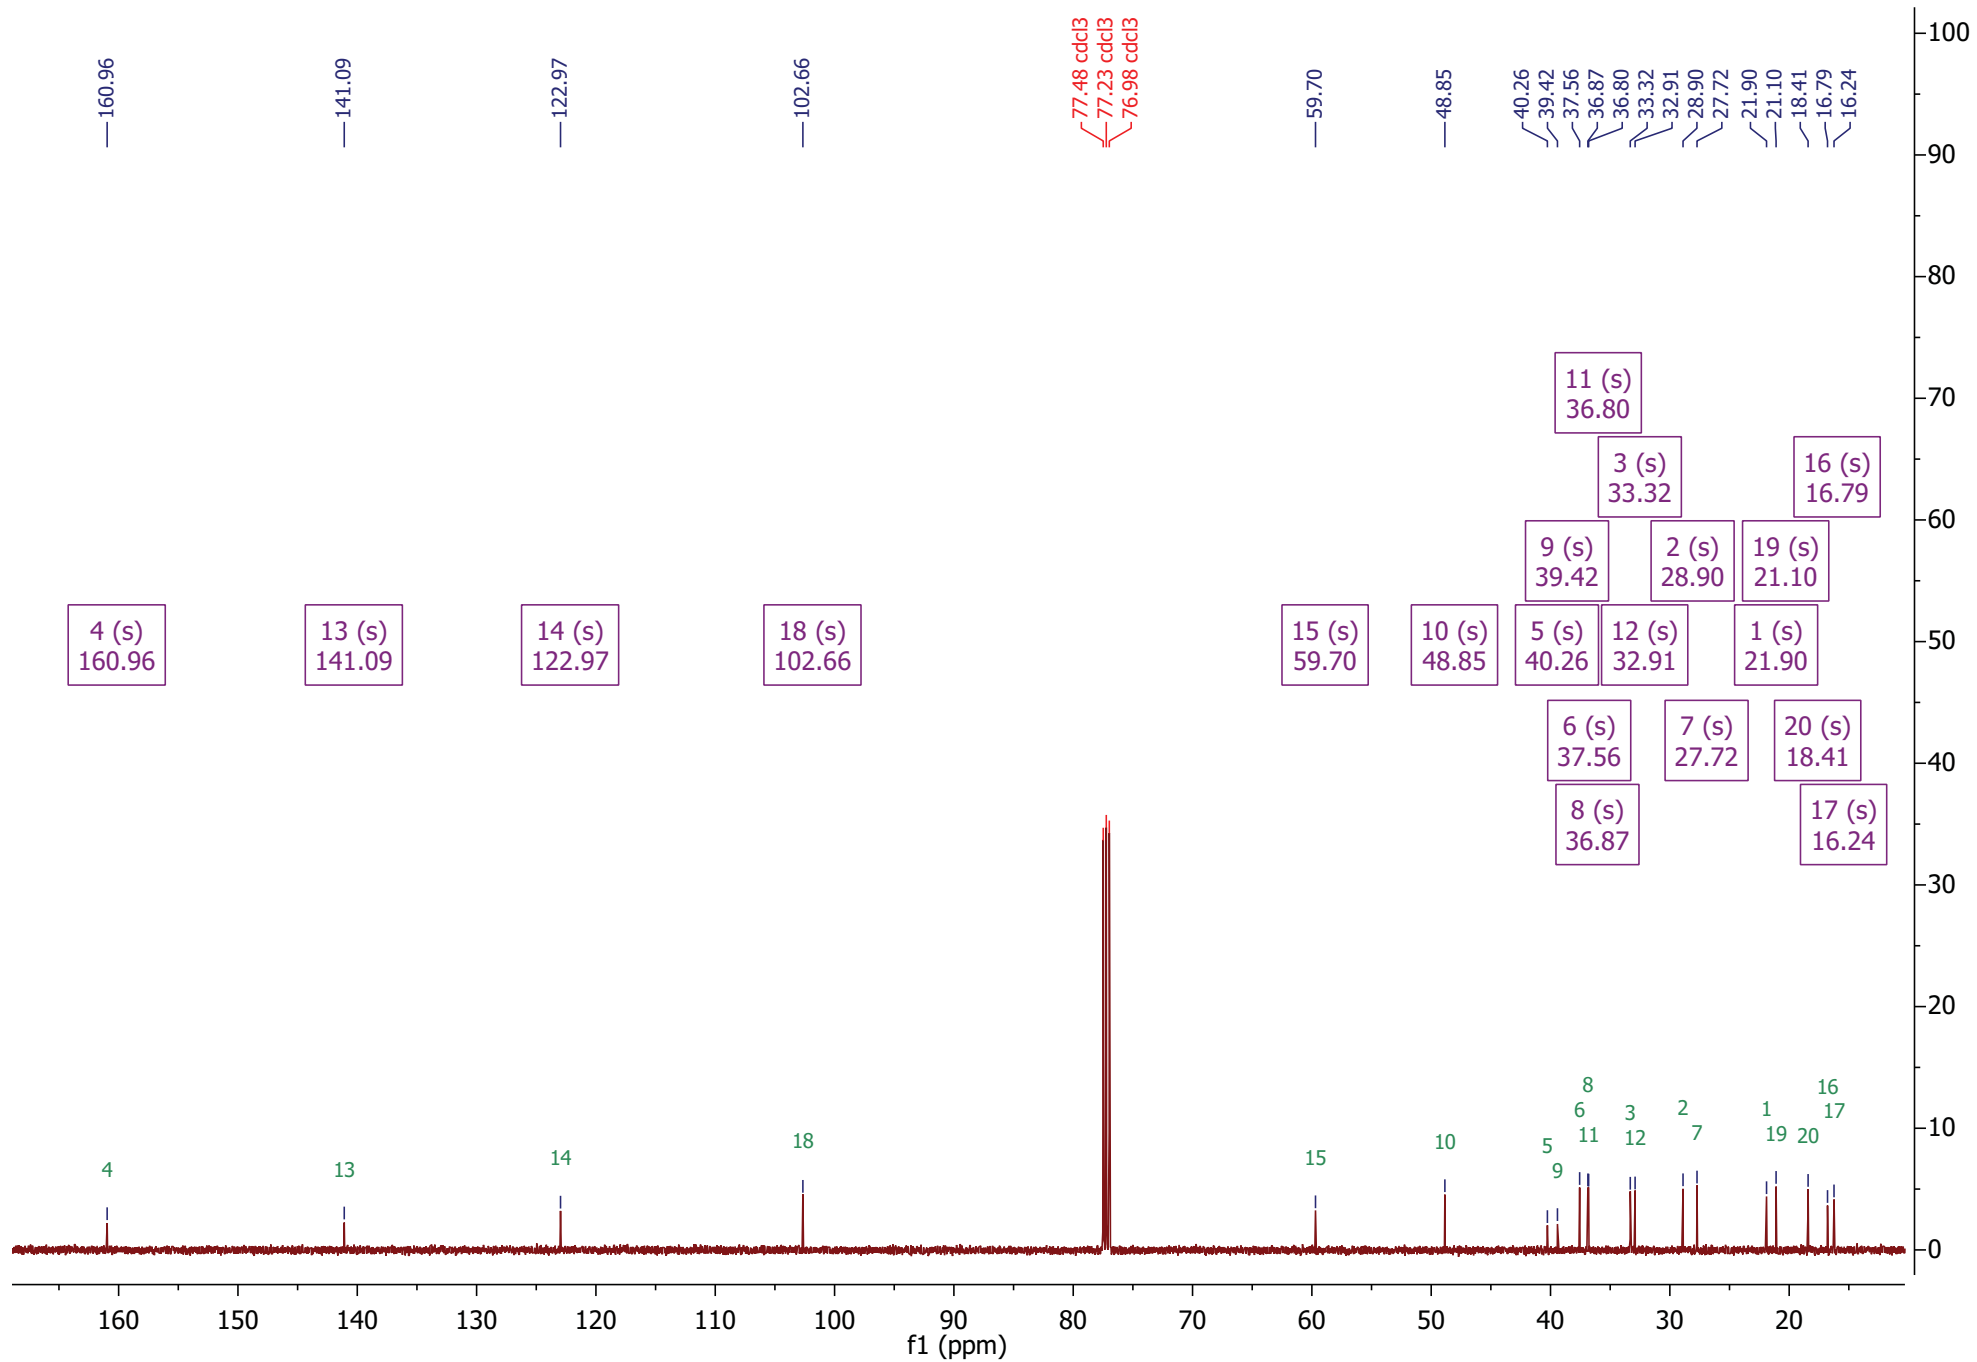

Figure S18-B.  $^{13}\text{C}$  NMR of neo-cleroda-4(18),13E-diene-15-ol [**38a**].



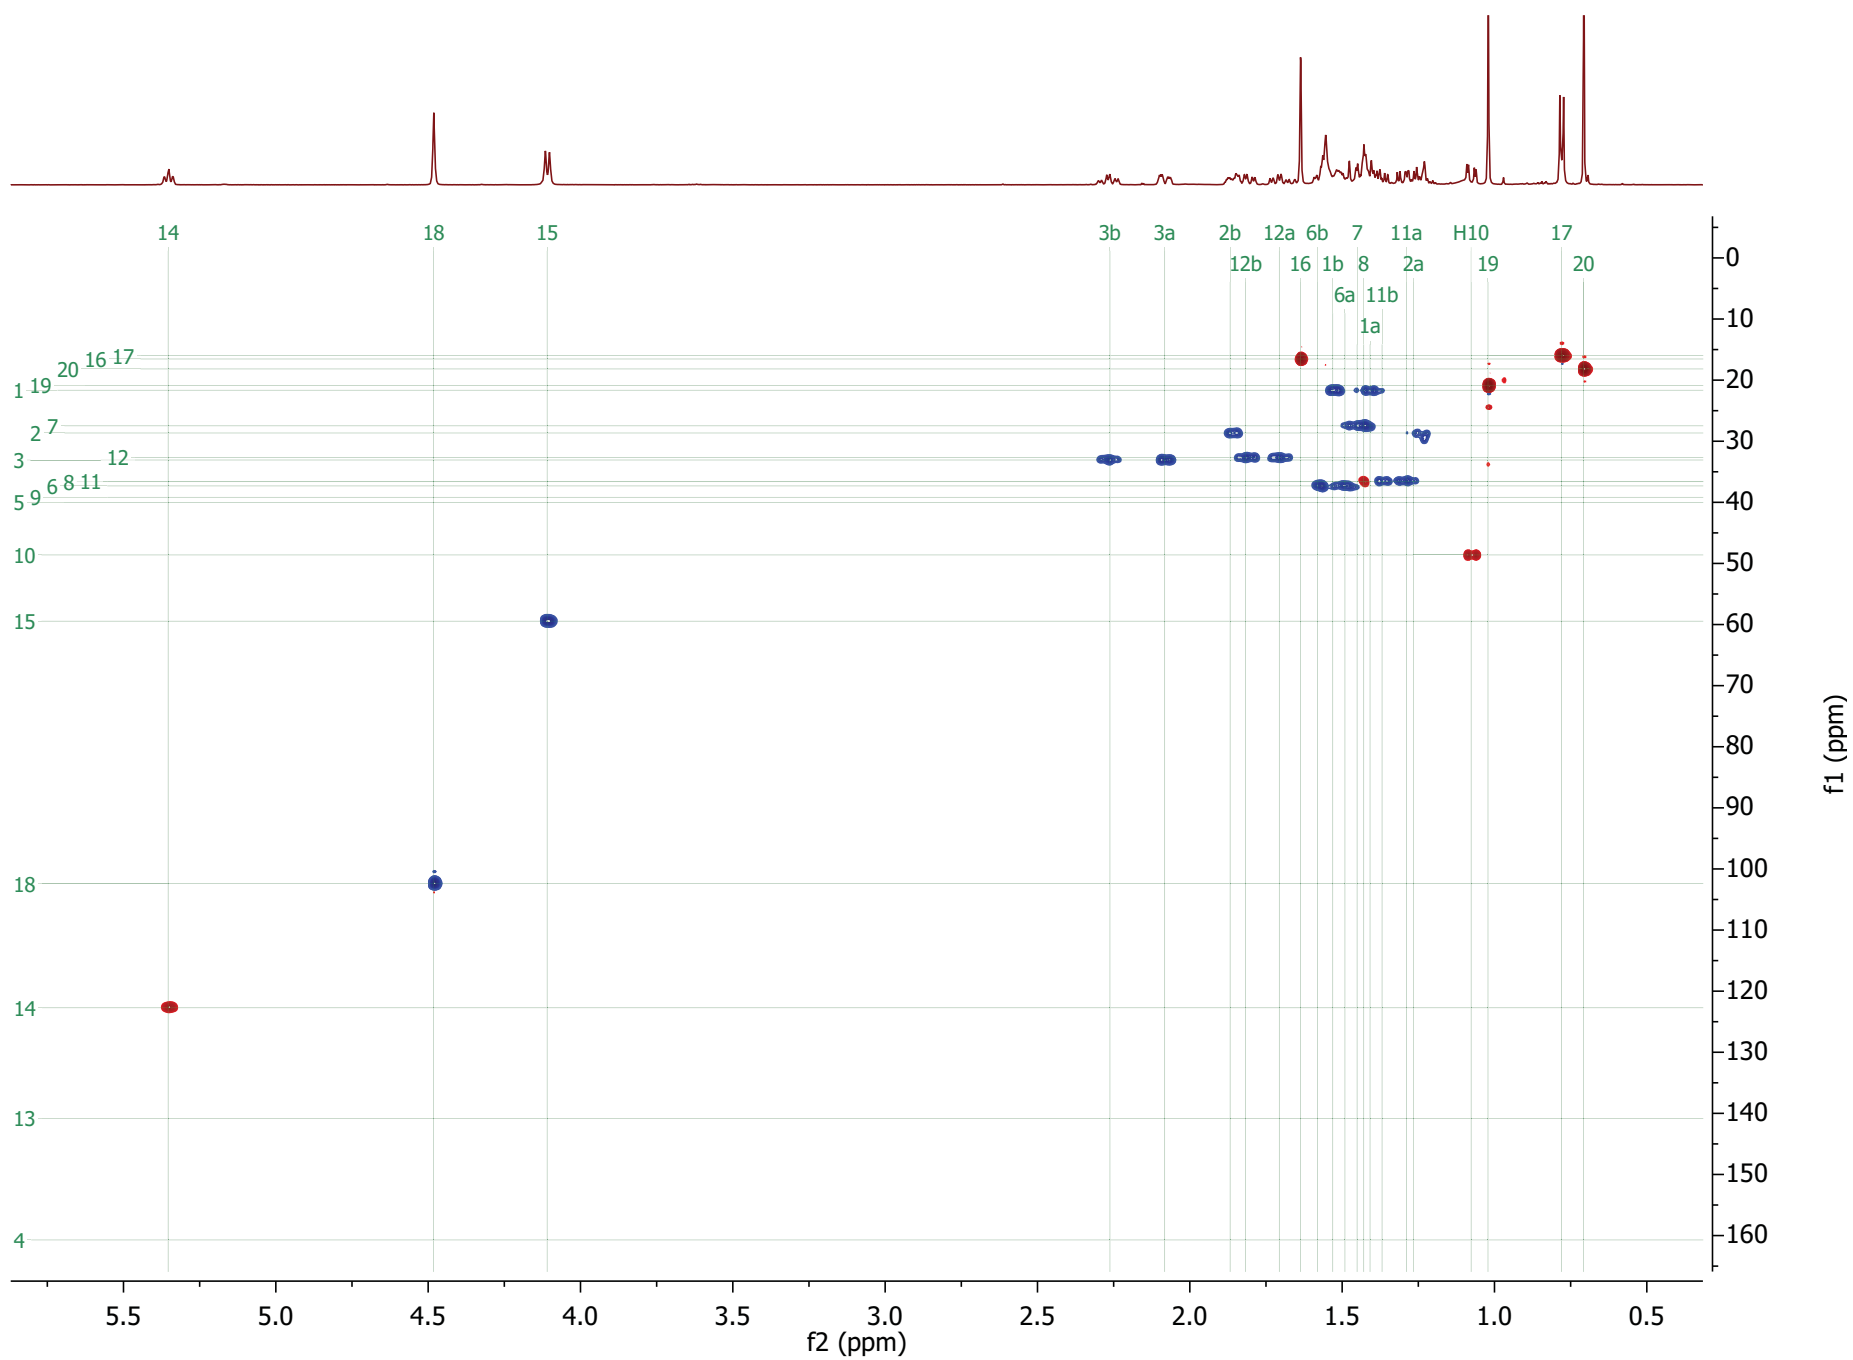

**Figure S18-D.**  $^1\text{H}$ - $^{13}\text{C}$  HSQC of neo-cleroda-4(18),13E-diene-15-ol [**38a**].

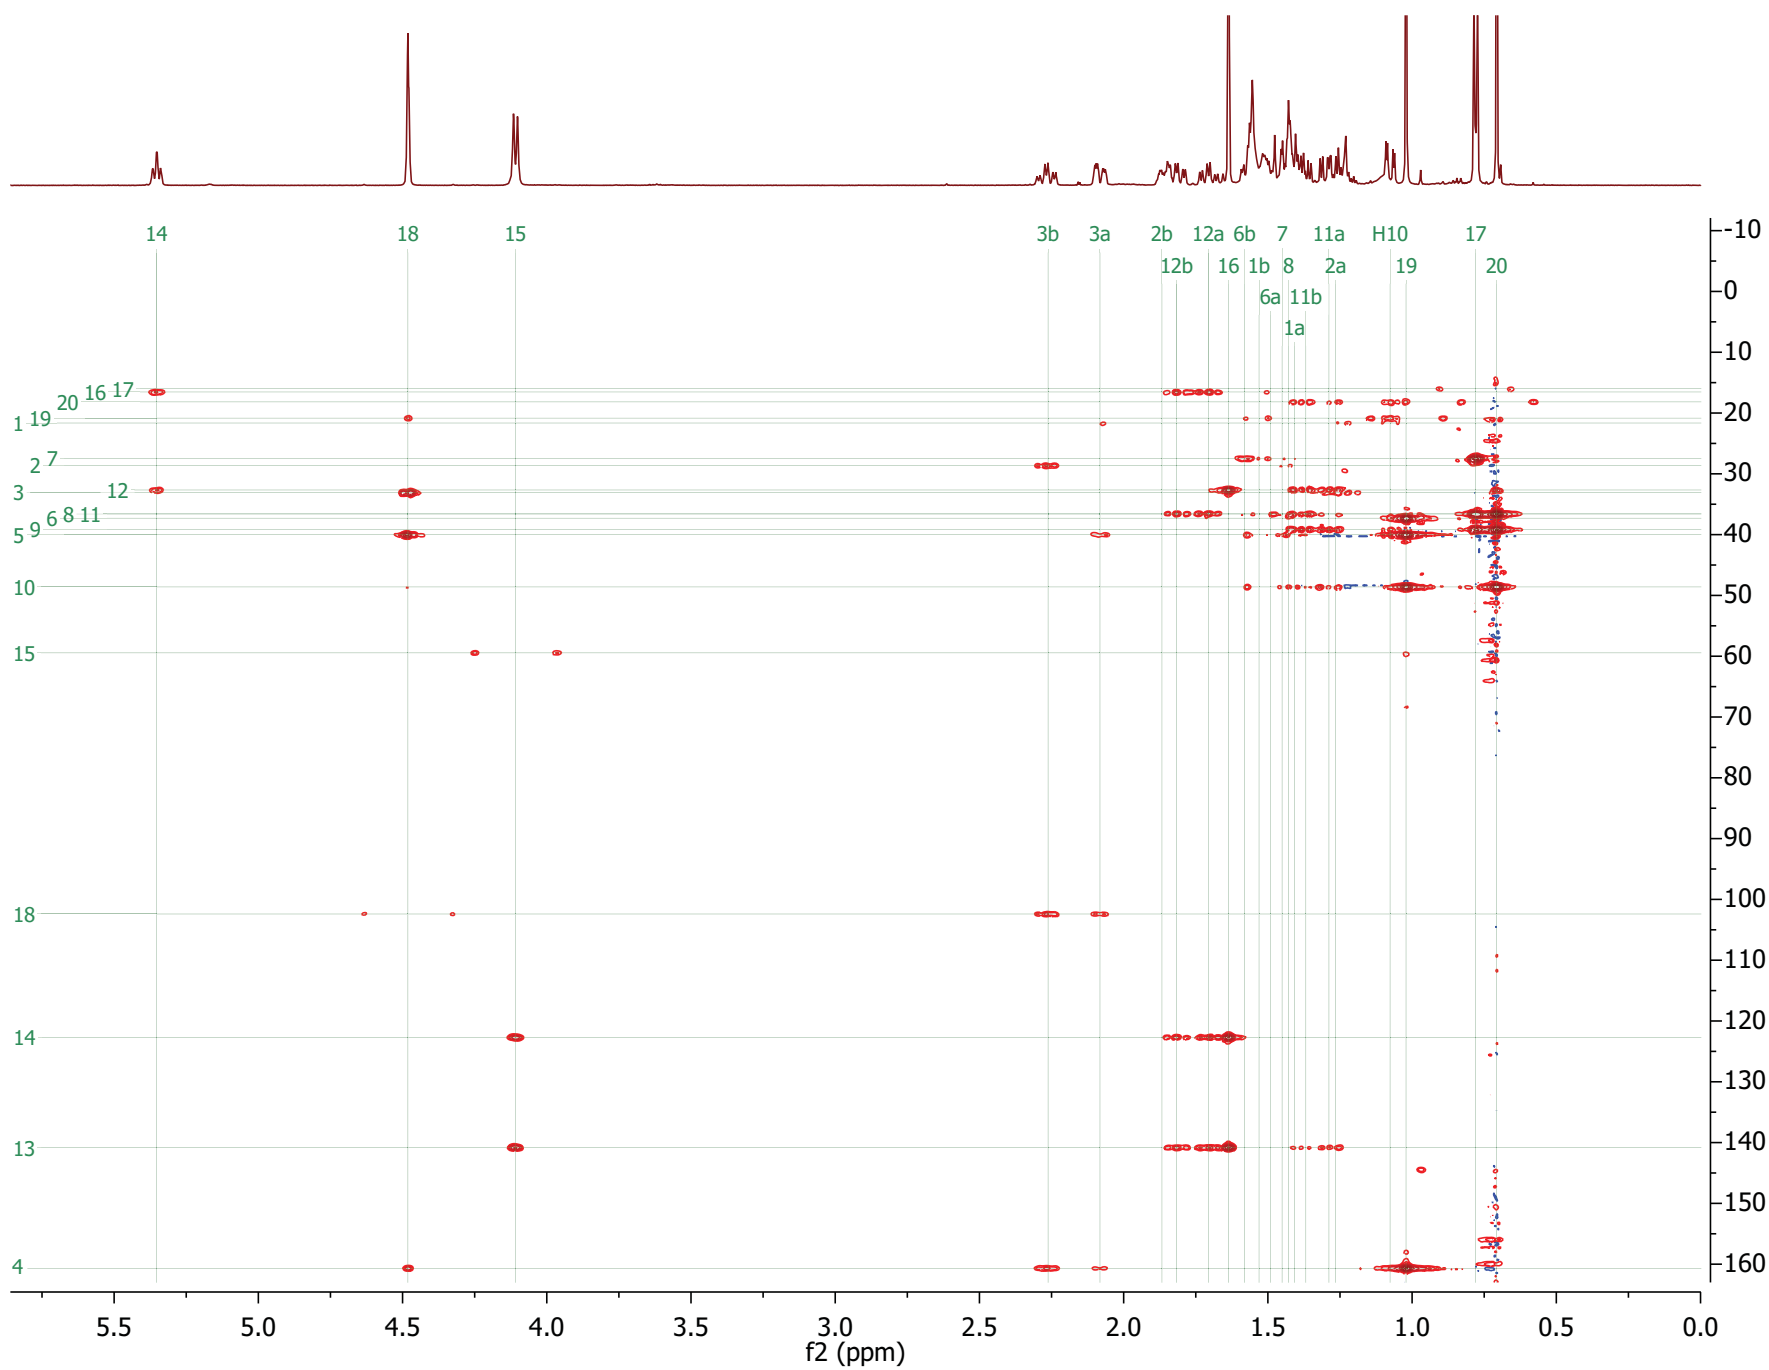

**Figure S18-E.**  $^1\text{H}$ - $^{13}\text{C}$  HMBC of neo-cleroda-4(18),13E-diene-15-ol [38a].



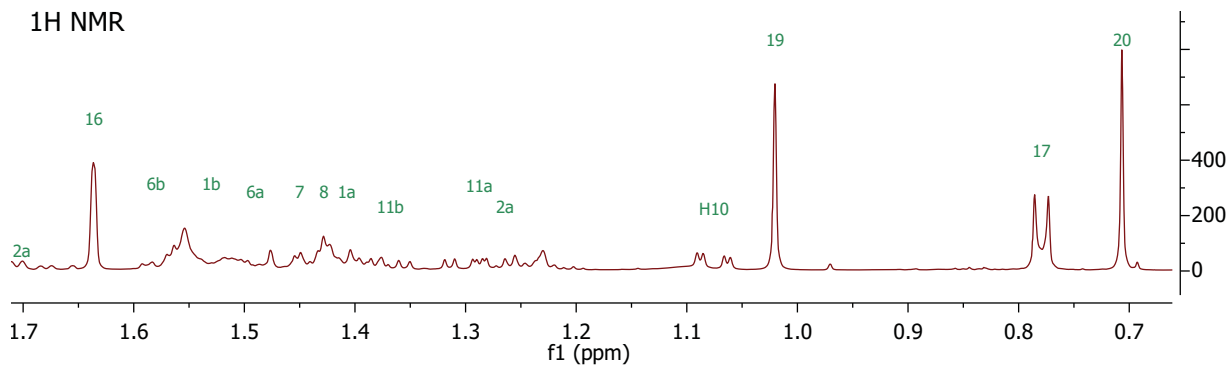

**Figure S18-F.** <sup>1</sup>H 1D-NOESY of neo-cleroda-4(18),13E-diene-15-ol [**38a**].

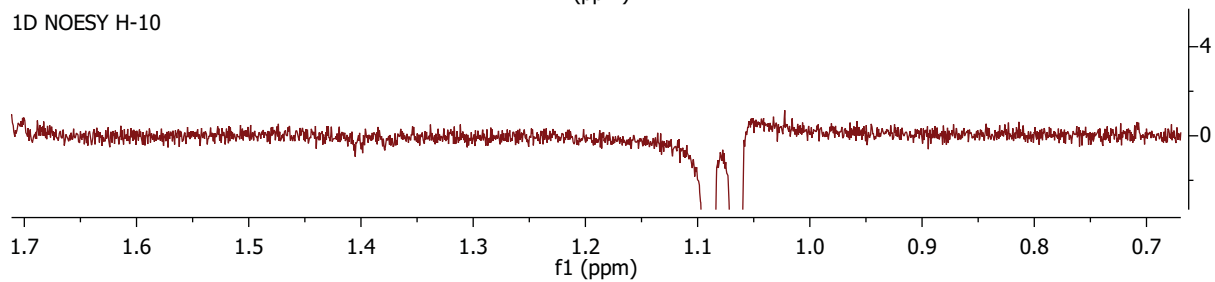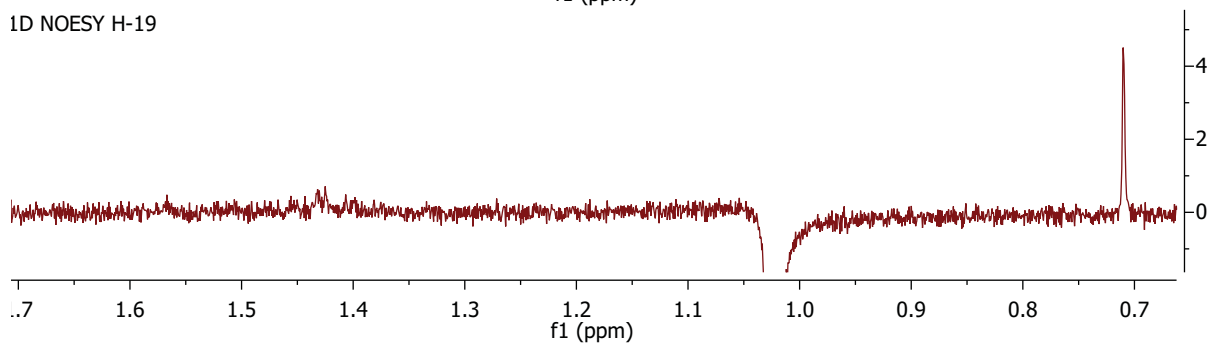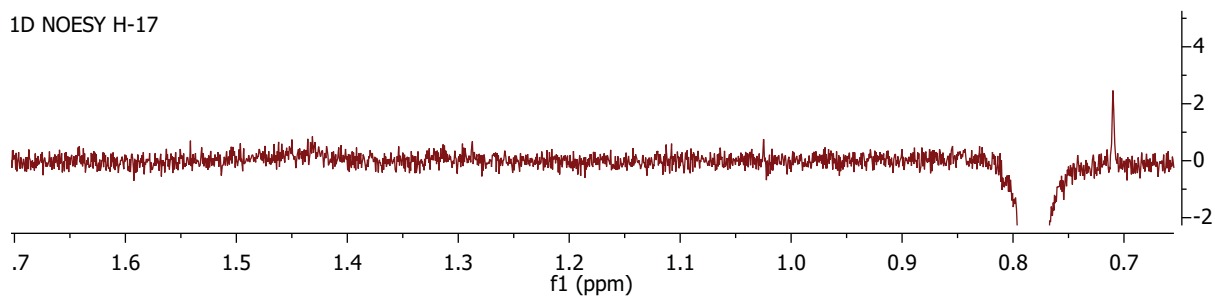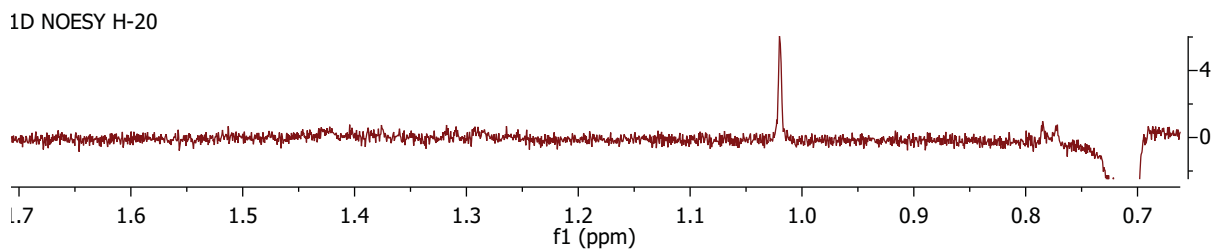

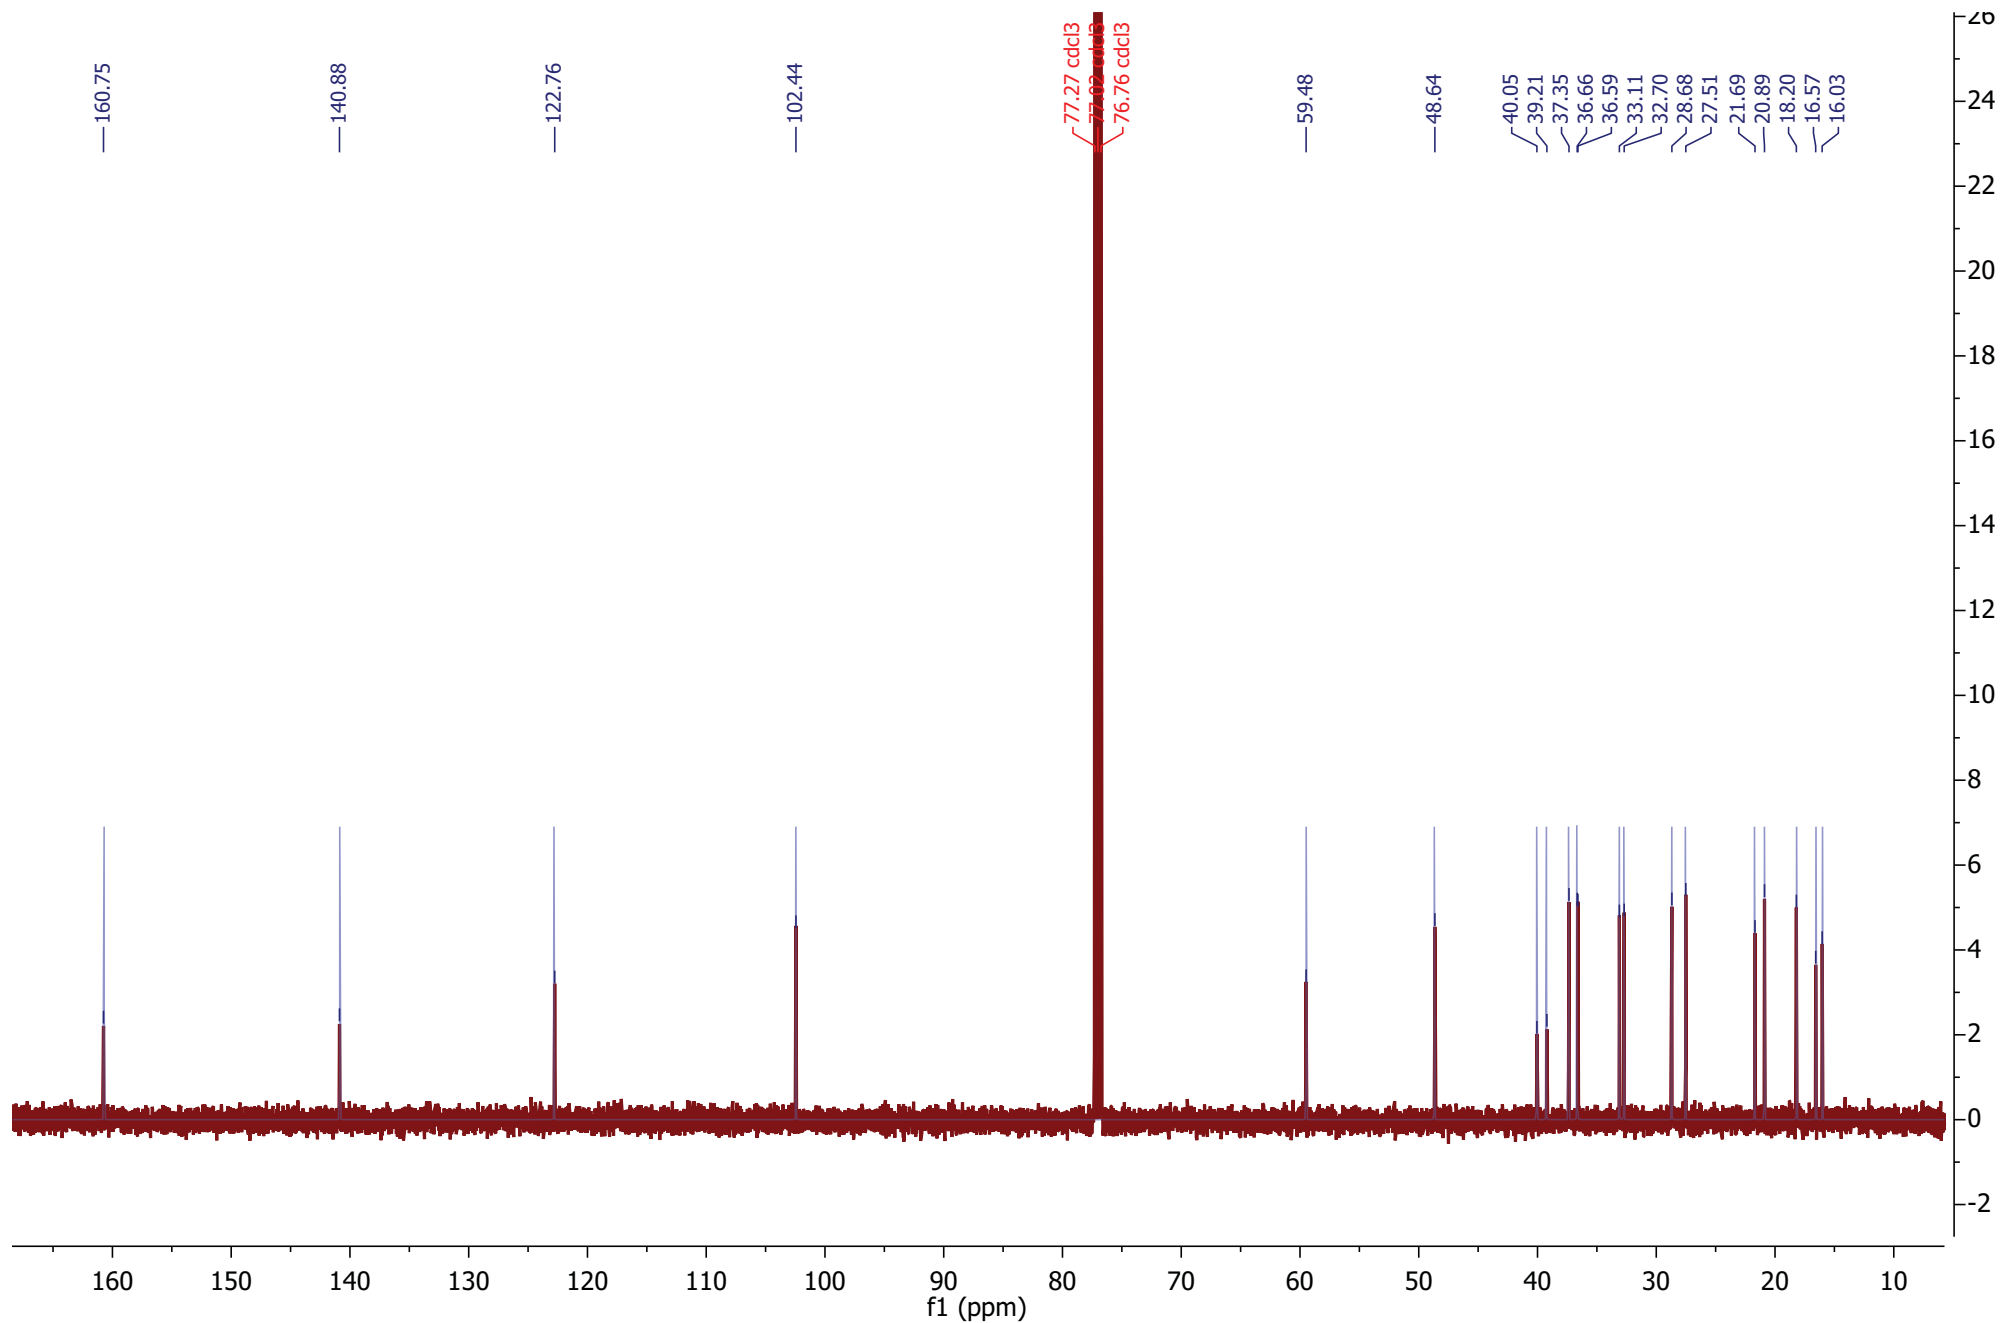

**Figure S18-G.** Overlay of  $^{13}\text{C}$  NMR of neo-cleroda-4(18),13E-diene-15-ol [**38a**] (red) with  $^{13}\text{C}$  NMR spectrum (blue) reconstructed from shifts reported for the same compound by Ohsaki (1994) (DOI: 10.1016/S0960-894X(01)80834-9).

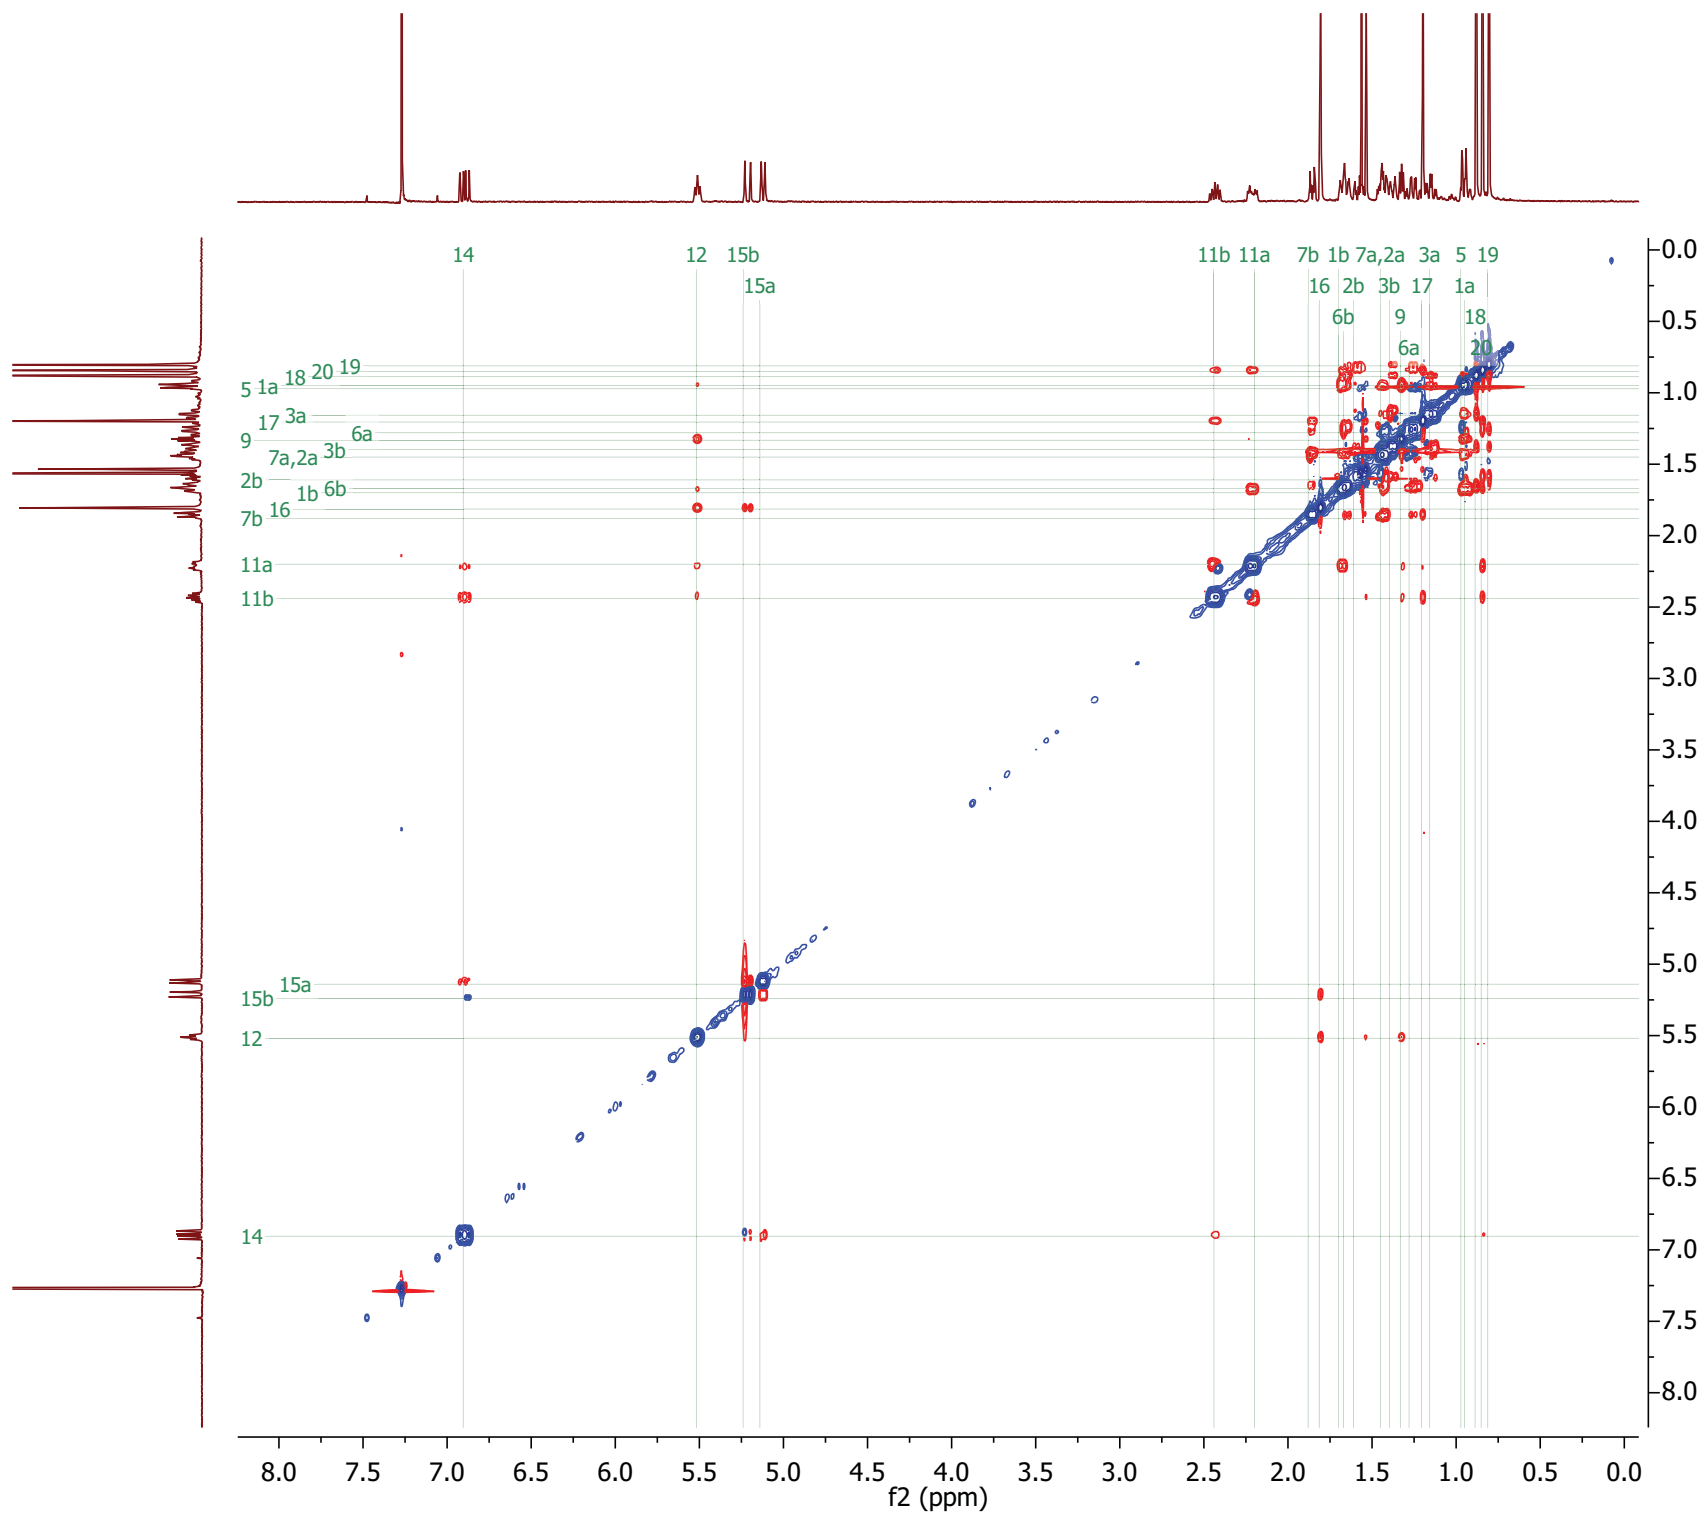

**Figure S19.** NOESY of (+)-cis-abienol.

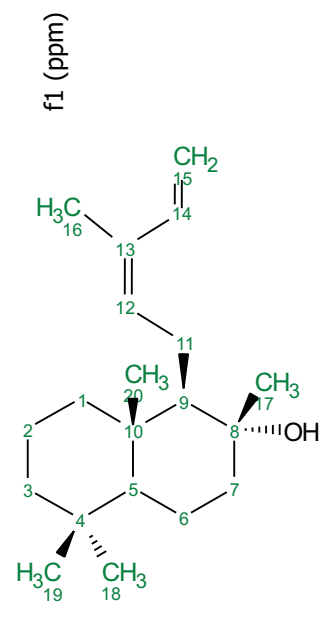

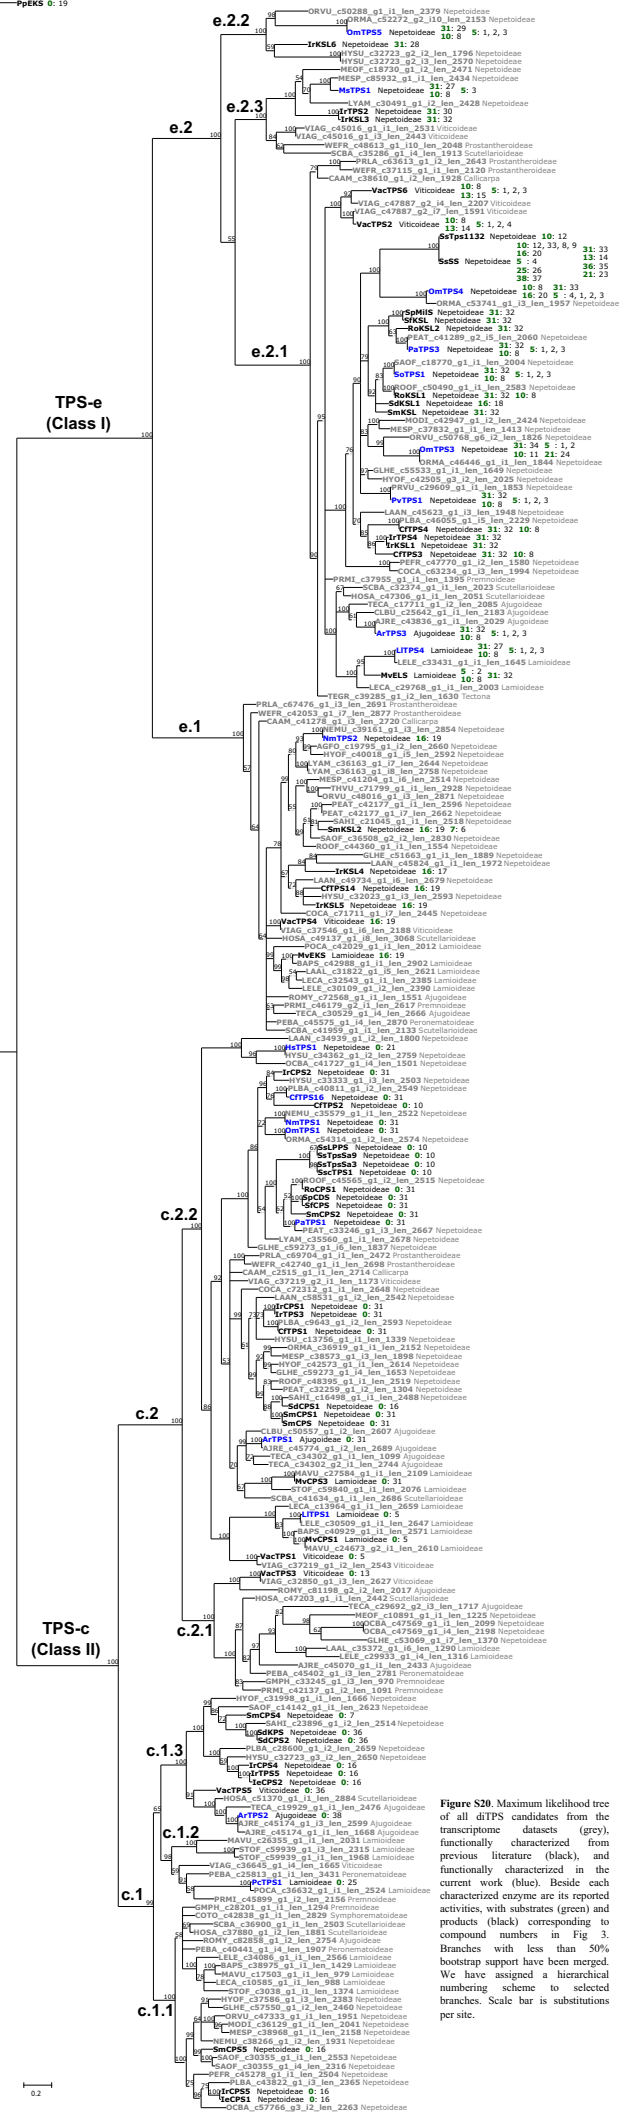

**Figure S20.** Maximum likelihood tree of all diTPS candidates from the transcriptome datasets (grey), functionally characterized from previous literature (black), and functionally characterized in the current work (blue). Beside each characterized enzyme are its reported activities, with substrates (green) and products (black) corresponding to compound names in Fig. 3. Branches with less than 50% bootstrap support have been merged. We have assigned a hierarchical numbering scheme to selected branches. Scale bar is substitutions per site.

|  |                            |     |                                 |     |     |                                         |     |
|--|----------------------------|-----|---------------------------------|-----|-----|-----------------------------------------|-----|
|  | SmCPS5                     | 247 | D I L H O M P T T L L S L S L E | 261 | 313 | G G V P V Y P V D L F E H W A V D R     | 332 |
|  | hCPS5                      | 152 | D I M H O V P T T L L S L S L E | 99  | 151 | G G V P V Y P V D L F E H W A V D R     | 170 |
|  | hCPS1                      | 85  | D I M H O V P T T L L S L S L E | 166 | 216 | G G V P V Y P V D L F E H W A V D R     | 237 |
|  | LECA_c10585_g1_f1_len_988  |     | .....                           |     |     | .....                                   |     |
|  | MAVU_c17503_g1_f1_len_979  |     | .....                           |     |     | .....                                   |     |
|  | STOF_c3038_g1_f1_len_1374  |     | .....                           |     |     | .....                                   |     |
|  | BAPS_c38975_g1_f1_len_1429 |     | .....                           |     |     | .....                                   |     |
|  | GMPH_c28201_g1_f1_len_1294 |     | .....                           |     |     | .....                                   |     |
|  | LELE_c34086_g1_f1_len_2568 |     | .....                           |     |     | .....                                   |     |
|  | ROMY_c82858_g1_f2_len_2754 |     | .....                           |     |     | .....                                   |     |
|  | FLBA_c43822_g1_f3_len_2365 |     | .....                           |     |     | .....                                   |     |
|  | SCBA_c36900_g1_f1_len_2503 |     | .....                           |     |     | .....                                   |     |
|  | COTO_c42838_g1_f1_len_2629 |     | .....                           |     |     | .....                                   |     |
|  | POCA_c40441_g1_f4_len_1907 |     | .....                           |     |     | .....                                   |     |
|  | HYOF_c37586_g1_f3_len_2383 |     | .....                           |     |     | .....                                   |     |
|  | PEFR_c45278_g1_f8_len_2504 |     | .....                           |     |     | .....                                   |     |
|  | GLHE_c57550_g1_f2_len_2480 |     | .....                           |     |     | .....                                   |     |
|  | MODI_c38179_g1_f1_len_2041 |     | .....                           |     |     | .....                                   |     |
|  | MESP_c38956_g1_f1_len_2158 |     | .....                           |     |     | .....                                   |     |
|  | ORVU_c47333_g1_f1_len_1951 |     | .....                           |     |     | .....                                   |     |
|  | NEMU_c38266_g1_f2_len_1931 |     | .....                           |     |     | .....                                   |     |
|  | HOSA_c37880_g1_f2_len_1881 |     | .....                           |     |     | .....                                   |     |
|  | OCBA_c37766_g3_f2_len_2263 |     | .....                           |     |     | .....                                   |     |
|  | SAOF_c30355_g1_f1_len_2263 |     | .....                           |     |     | .....                                   |     |
|  | SAOF_c30355_g1_f4_len_2316 |     | .....                           |     |     | .....                                   |     |
|  | VIAG_c38645_g1_f1_len_1665 |     | .....                           |     |     | .....                                   |     |
|  | STOF_c59939_g1_f3_len_2315 |     | .....                           |     |     | .....                                   |     |
|  | POCA_c38632_g1_f1_len_2524 |     | .....                           |     |     | .....                                   |     |
|  | MAVU_c26355_g1_f1_len_2031 |     | .....                           |     |     | .....                                   |     |
|  | STOF_c59939_g1_f1_len_1968 |     | .....                           |     |     | .....                                   |     |
|  | PEBA_c25813_g1_f1_len_3431 |     | .....                           |     |     | .....                                   |     |
|  | PRMI_c45899_g1_f2_len_2156 |     | .....                           |     |     | .....                                   |     |
|  | RcTPS1                     | 246 | D I L H S V P T T L L S L S L E | 262 | 317 | G G V P V Y P V D L F E H W A V D R     | 336 |
|  | SmCPS4                     | 233 | D L L H K E P T S L L S L S L E | 247 | 298 | G G V P S T Y P V D M F E H W A V D R   | 317 |
|  | SdCPS                      | 244 | D L M H K K P T S L L S L S L E | 258 | 309 | G G V P N A Y P V D M F E H W S V D R   | 328 |
|  | SdCPS2                     | 244 | D L M H K K P T S L L S L S L E | 258 | 309 | G G V P N A Y P V D M F E H W S V D R   | 328 |
|  | hCPS2                      | 245 | D L L H K K P T S L L S L S L E | 259 | 310 | G G V P N A Y P V D M F E H W S V D R   | 329 |
|  | hTPS5                      | 247 | E L L H K K P T S L L S L S L E | 261 | 312 | G G V P V Y P V D M F E H W C V D R     | 331 |
|  | hCPS4                      | 247 | E L L H K K P T S L L S L S L E | 261 | 312 | G G V P N A Y P V D M F E H W C V D R   | 331 |
|  | VacTPS5                    | 251 | D L L H K M P T S L L S L S L E | 265 | 316 | G G V P N A Y P V D M F E H W S V D R   | 335 |
|  | HYOF_c31998_g1_f1_len_1666 |     | .....                           |     |     | .....                                   |     |
|  | AJRE_c45174_g1_f1_len_1668 |     | .....                           |     |     | .....                                   |     |
|  | TECA_c19929_g1_f1_len_2476 |     | .....                           |     |     | .....                                   |     |
|  | AJRE_c45174_g1_f1_len_2599 |     | .....                           |     |     | .....                                   |     |
|  | HOSA_c51370_g1_f1_len_2884 |     | .....                           |     |     | .....                                   |     |
|  | SAOF_c14142_g1_f1_len_2823 |     | .....                           |     |     | .....                                   |     |
|  | FLBA_c32662_g1_f3_len_2623 |     | .....                           |     |     | .....                                   |     |
|  | HYSU_c32723_g3_f2_len_2950 |     | .....                           |     |     | .....                                   |     |
|  | SAHI_c23896_g1_f2_len_2514 |     | .....                           |     |     | .....                                   |     |
|  | AtTPS2                     | 251 | D I L H K M P T L L S L S L E   | 265 | 316 | G G V P N A F P V D L F O R N Y T V D R | 335 |
|  | VacTPS3                    | 255 | E L L H K V P T C L L H N L E   | 269 | 327 | G G A P T Y P V D I Y A R W A V D R     | 346 |
|  | LELE_c29933_g1_f4_len_1316 |     | .....                           |     |     | .....                                   |     |
|  | MEOF_c10891_g1_f1_len_1225 |     | .....                           |     |     | .....                                   |     |
|  | GLHE_c33069_g1_f1_len_1370 |     | .....                           |     |     | .....                                   |     |
|  | TECA_c29692_g2_f3_len_1717 |     | .....                           |     |     | .....                                   |     |
|  | LAAL_c35372_g1_f6_len_1290 |     | .....                           |     |     | .....                                   |     |
|  | PRMI_c42137_g1_f2_len_1091 |     | .....                           |     |     | .....                                   |     |
|  | OCBA_c47569_g1_f1_len_2099 |     | .....                           |     |     | .....                                   |     |
|  | GMPH_c33245_g1_f3_len_970  |     | .....                           |     |     | .....                                   |     |
|  | OCBA_c47569_g1_f4_len_2198 |     | .....                           |     |     | .....                                   |     |
|  | AJRE_c45070_g1_f1_len_2433 |     | .....                           |     |     | .....                                   |     |
|  | PEBA_c45402_g1_f3_len_2781 |     | .....                           |     |     | .....                                   |     |
|  | HOSA_c47203_g1_f1_len_2442 |     | .....                           |     |     | .....                                   |     |
|  | ROMY_c81198_g2_f2_len_2017 |     | .....                           |     |     | .....                                   |     |
|  | VIAG_c32650_g1_f3_len_2627 |     | .....                           |     |     | .....                                   |     |
|  | hCPS2                      | 249 | D M I Y Q T P T L L S L S L E   | 263 | 315 | G G A P T Y P V D V F A R W A I D R     | 334 |
|  | PEAT_c33246_g1_f3_len_2607 |     | .....                           |     |     | .....                                   |     |
|  | HYSU_c33333_g1_f3_len_2503 |     | .....                           |     |     | .....                                   |     |
|  | FLBA_c40811_g2_f2_len_2549 |     | .....                           |     |     | .....                                   |     |
|  | CTPS16                     | 261 | D M I Y K P T L L S L S L E     | 281 | 335 | G G A P T Y P V D V F A R W A V D R     | 354 |
|  | LYAM_c35560_g1_f1_len_2678 |     | .....                           |     |     | .....                                   |     |
|  | GLHE_c59273_g1_f1_len_1937 |     | .....                           |     |     | .....                                   |     |
|  | SdCPS                      | 249 | D M I Y Q T P T L L S L S L E   | 261 | 315 | G G A P T Y P V D V F A R W A V D R     | 332 |
|  | PaTPS1                     | 249 | D M I Y Q T P T L L S L S L E   | 263 | 315 | G G A P T Y P V D V F A R W A I D R     | 334 |
|  | RcCPS1                     | 250 | D M I Y Q K P T L L S L S L E   | 264 | 316 | G G A P T Y P V D V F A R W A V D R     | 335 |
|  | ROOF_c45565_g1_f2_len_2515 |     | .....                           |     |     | .....                                   |     |
|  | GLHE_c59273_g1_f1_len_1653 |     | .....                           |     |     | .....                                   |     |
|  | hCPS5                      | 129 | E I M H K V P T S L L S L S L E | 143 | 195 | G G A P T Y P V D V F A R W A I D R     | 214 |
|  | SmCPS2                     | 248 | D M I Y Q T P T L L S L S L E   | 262 | 314 | G G V P T Y P V D V F A R W A V D R     | 333 |
|  | OmTPS1                     | 246 | D L I Y K L P T L L S L S L E   | 260 | 312 | G G A P T Y P V D V F A R W A V D R     | 331 |
|  | ORMA_c54314_g1_f2_len_2574 |     | .....                           |     |     | .....                                   |     |
|  | NEMU_c35579_g1_f1_len_2522 |     | .....                           |     |     | .....                                   |     |
|  | hMTPS1                     | 161 | D F I Y Q L P T L L S L S L E   | 175 | 227 | G G V P H T Y P V D V F A R W A V D R   | 246 |
|  | CTPS2                      | 233 | G M I Y E S P T S L L S L S L E | 247 | 299 | G G V P T Y P V D I F A R W A V D R     | 318 |
|  | LAAN_c34939_g1_f2_len_1800 |     | .....                           |     |     | .....                                   |     |
|  | SaTPS9                     | 247 | D L V Y Q M P T N L L S L S L E | 261 | 313 | G G A P T Y P V D I F S R W A I D R     | 332 |
|  | SaTPS3                     | 247 | D L V Y Q M P T N L L S L S L E | 261 | 313 | G G A P T Y P V D I F S R W A I D R     | 332 |
|  | SdCPS                      | 247 | D L V Y Q M P T N L L S L S L E | 261 | 313 | G G A P T Y P V D I F S R W A I D R     | 332 |
|  | SaTPS1                     | 247 | D L V Y Q M P T N L L S L S L E | 261 | 313 | G G A P T Y P V D I F S R W A I D R     | 332 |
|  | hTPS3                      | 258 | E M M H K V P T S L L S L S L E | 272 | 324 | G G A P T Y P V D V F G R W A V D R     | 343 |
|  | HYSU_c13756_g1_f1_len_1339 |     | .....                           |     |     | .....                                   |     |
|  | TECA_c34302_g1_f1_len_1099 |     | .....                           |     |     | .....                                   |     |
|  | VIAG_c37219_g2_f1_len_1173 |     | .....                           |     |     | .....                                   |     |
|  | CTPS1                      | 251 | E M M H K V P T S L L S L S L E | 265 | 317 | G G A P T Y P V D V F G R W A I D R     | 336 |
|  | FLBA_c39643_g1_f2_len_2593 |     | .....                           |     |     | .....                                   |     |
|  | PEAT_c32259_g1_f2_len_1304 |     | .....                           |     |     | .....                                   |     |
|  | LAAN_c38531_g1_f2_len_2542 |     | .....                           |     |     | .....                                   |     |
|  | OCBA_c37312_g1_f1_len_2648 |     | .....                           |     |     | .....                                   |     |
|  | CAAM_c2515_g1_f1_len_2714  |     | .....                           |     |     | .....                                   |     |
|  | MESP_c38573_g1_f3_len_1898 |     | .....                           |     |     | .....                                   |     |
|  | HYOF_c42573_g1_f1_len_2614 |     | .....                           |     |     | .....                                   |     |
|  | WEFR_c42740_g1_f1_len_2690 |     | .....                           |     |     | .....                                   |     |
|  | ORMA_c38919_g1_f1_len_2152 |     | .....                           |     |     | .....                                   |     |
|  | ROOF_c48395_g1_f1_len_2519 |     | .....                           |     |     | .....                                   |     |
|  | SmCPS1                     | 245 | E I M H K I P T S L L S L S L E | 259 | 311 | G G A P T Y P V D V F G R W A I D R     | 330 |
|  | SmCPS1                     | 245 | E I M H K M P T S L L S L S L E | 259 | 311 | G G A P T Y P V D V F G R W A I D R     | 330 |
|  | SAHI_c16498_g1_f1_len_2488 |     | .....                           |     |     | .....                                   |     |
|  | CLBI_c50557_g1_f2_len_2607 |     | .....                           |     |     | .....                                   |     |
|  | SdCPS1                     | 247 | E I M H K M P T S L L S L S L E | 262 | 314 | G G A P T Y P V D V F G R W A V D R     | 332 |
|  | PRLA_c89704_g1_f1_len_2472 |     | .....                           |     |     | .....                                   |     |
|  | VacTPS1                    | 250 | E V L H E R S T S I L Y G M E   | 264 | 318 | G A R V Y P V D L F A R W A V D R       | 337 |
|  | SCBA_c41634_g1_f1_len_2686 |     | .....                           |     |     | .....                                   |     |
|  | TECA_c34302_g2_f1_len_2744 |     | .....                           |     |     | .....                                   |     |
|  | VIAG_c37219_g1_f2_len_2543 |     | .....                           |     |     | .....                                   |     |
|  | AtTPS1                     | 250 | E M M H K V P T S L L S L S L E | 264 | 316 | G G A P T Y P V D V F G R W A V D R     | 335 |
|  | AJRE_c45774_g1_f2_len_2689 |     | .....                           |     |     | .....                                   |     |
|  | MAVU_c27584_g1_f1_len_2109 |     | .....                           |     |     | .....                                   |     |
|  | MvCPS1                     | 245 | E V V H K V A T S L L S L S L E | 259 | 311 | G G A P T Y P V D I F G R W A V D R     | 330 |
|  | CTOF_c59840_g1_f1_len_2078 |     | .....                           |     |     | .....                                   |     |
|  | OCBA_c41727_g1_f4_len_1501 |     | .....                           |     |     | .....                                   |     |
|  | BAPS_c40929_g1_f1_len_2571 |     | .....                           |     |     | .....                                   |     |
|  | MAVU_c24673_g2_f1_len_2610 |     | .....                           |     |     | .....                                   |     |
|  | MvCPS1                     | 245 | K M M E K E T S L M Y A A E     | 259 | 317 | G G A P N Y P V D L W S R W A T D R     | 331 |
|  | LECA_c13964_g1_f1_len_2659 |     | .....                           |     |     | .....                                   |     |
|  | LELE_c30509_g1_f1_len_2647 |     | .....                           |     |     | .....                                   |     |
|  | LTPS1                      | 245 | K M M E K E T S L M Y A A E     | 259 | 312 | G G A P N Y P I D L W S R W A T D R     | 331 |
|  | HsTPS1                     | 241 | E V M H O V T T L L S L S L E   | 255 | 307 | G G A P N Y P I D I F A R W A V D R     | 326 |
|  | HYSU_c34362_g1_f2_len_2759 |     | .....                           |     |     | .....                                   |     |

**Figure S21: Activity-determining regions in an alignment of previously known (black), newly characterized (blue), and candidate (grey) TPS-c enzymes from Lamiaceae.** Red stars indicate residues previously implicated in catalytic specificity. Histidine at the first position and asparagine at the second position have been associated with *ent*-CPP synthase activity. Red hash indicates residue previously implicated in Mg<sup>2+</sup> driven inhibition. A histidine in this position leads to sensitivity to Mg<sup>2+</sup> inhibition, which is characteristic of *ent*-CPP synthases involved in gibberellin biosynthesis, whereas enzymes of specialized metabolism lacking the histidine showed no susceptibility to Mg<sup>2+</sup> inhibition. Positions are colored to indicate conservation within each subgroup.

e.1  
 LAAN\_c45824.g1\_i1\_len\_1972  
 GLHE\_c51663.g1\_i1\_len\_1889  
 IrKSL4  
 LAAN\_c49734.g1\_i6\_len\_2679  
 CTPS14  
 IrKSL5  
 HYSU\_c32023.g1\_i3\_len\_2593  
 COCA\_c71711.g1\_i7\_len\_2445  
 SAHI\_c21045.g1\_i1\_len\_2518  
 ROOF\_c44360.g1\_i1\_len\_1554  
 SmKSL2  
 SAOF\_c36508.g2\_i2\_len\_2830  
 PEAT\_c42177.g1\_i7\_len\_2662  
 PEAT\_c42177.g1\_i1\_len\_2596  
 MESP\_c41204.g1\_i6\_len\_2514  
 THVU\_c71799.g1\_i1\_len\_2928  
 ORVU\_c48016.g1\_i3\_len\_2871  
 NEMU\_c39161.g1\_i3\_len\_2854  
 NmTPS2  
 LYAM\_c36163.g1\_i7\_len\_2644  
 LYAM\_c36163.g1\_i6\_len\_2758  
 HYOF\_c40018.g1\_i5\_len\_2592  
 AGFO\_c19795.g1\_i2\_len\_2660  
 POCA\_c42029.g1\_i1\_len\_2012  
 LELE\_c30109.g1\_i2\_len\_2390  
 MvEKS  
 BAPS\_c42988.g1\_i1\_len\_2902  
 LAAL\_c31822.g1\_i5\_len\_2621  
 LECA\_c32943.g1\_i1\_len\_2385  
 TECA\_c30529.g1\_i4\_len\_2666  
 ROMY\_c72568.g1\_i1\_len\_1551  
 HOSA\_c49137.g1\_i8\_len\_3068  
 PRLA\_c67476.g1\_i3\_len\_2691  
 SCBA\_c41959.g1\_i1\_len\_2133  
 VacTPS4  
 VIAG\_c37546.g1\_i6\_len\_2188  
 PEBA\_c45575.g1\_i4\_len\_2870  
 PRMI\_c46179.g2\_i1\_len\_2617  
 WEFR\_c42053.g1\_i7\_len\_2877  
 CAAM\_c41278.g1\_i3\_len\_2720  
 LELE\_c33431.g1\_i1\_len\_1645  
 LITPS4  
 MvELS  
 LECA\_c29768.g1\_i1\_len\_2003  
 VacTPS6  
 VIAG\_c47887.g2\_i4\_len\_2207  
 VacTPS2  
 VIAG\_c47887.g2\_i7\_len\_1591  
 TECA\_c17711.g1\_i2\_len\_2085  
 CLBU\_c25642.g1\_i1\_len\_2183  
 AJRE\_c43836.g1\_i1\_len\_2029  
 ArTPS3  
 WEFR\_c37115.g1\_i1\_len\_2120  
 PRLA\_c63813.g1\_i2\_len\_2643  
 CAAM\_c38810.g1\_i2\_len\_1928  
 SCBA\_c32374.g1\_i1\_len\_2023  
 HOSA\_c47306.g1\_i1\_len\_2051  
 TEGR\_c39285.g1\_i2\_len\_1630  
 PRMI\_c37955.g1\_i1\_len\_1395  
 SoTPS1132  
 SaSS  
 ORMA\_c53741.g1\_i3\_len\_1957  
 OmTPS4  
 PEFR\_c47770.g1\_i2\_len\_1580  
 COCA\_c63234.g1\_i3\_len\_1994  
 ORMA\_c64446.g1\_i1\_len\_1844  
 OmTPS3  
 SIKSL  
 SpMIS  
 RoKSL2  
 PEAT\_c41289.g2\_i5\_len\_2060  
 PaTPS3  
 ORVU\_c50768.g6\_i2\_len\_1826  
 CTPS4  
 PLBA\_c46055.g1\_i5\_len\_2229  
 CTPS3  
 IrKSL1  
 IrTPS4  
 LAAN\_c45623.g1\_i3\_len\_1948  
 MODL\_c42947.g1\_i2\_len\_2424  
 MESP\_c37832.g1\_i1\_len\_1413  
 PRVU\_c29609.g1\_i1\_len\_1853  
 PvTPS1  
 HYOF\_c42605.g3\_i2\_len\_2025  
 GLHE\_c55533.g1\_i1\_len\_1649  
 SdkSL1  
 SmKSL  
 RoKSL1  
 ROOF\_c50490.g1\_i1\_len\_2583  
 SAOF\_c18770.g1\_i1\_len\_2004  
 SoTPS1  
 HYSU\_c32723.g2\_i3\_len\_2570  
 HYSU\_c32723.g2\_i2\_len\_1796  
 ORMA\_c52272.g2\_i10\_len\_2153  
 OmTPS5  
 IrKSL6  
 ORVU\_c50288.g1\_i1\_len\_2379  
 IrKSL3  
 IrTPS2  
 WEFR\_c48613.g1\_i10\_len\_2048  
 SCBA\_c35286.g1\_i4\_len\_1913  
 VIAG\_c45016.g1\_i1\_len\_2531  
 VIAG\_c45016.g1\_i3\_len\_2443  
 MEOF\_c18730.g1\_i2\_len\_2471  
 LYAM\_c30491.g1\_i2\_len\_2428  
 MESP\_c85932.g1\_i1\_len\_2434  
 MsTPS1

412 IGRVILSAI 420  
 406 IGRNVLPAL 414  
 660 IGPVLPAL 668  
 649 IGPVLPAL 657  
 647 IGPVLPAL 655  
 647 IGPVLPAL 655  
 651 IGPVLPAL 659  
 666 IGPVLPAL 674  
 648 IGPVLPAL 656  
 283 IGPVLPAL 291  
 650 IGPVLPAL 658  
 651 IGPVLPAL 659  
 649 IGPVLPAL 657  
 645 I--I--ICRGI 650  
 652 IGPVLPAL 660  
 653 IGPVLPAL 661  
 647 IGPVLPAL 655  
 697 IGPVLPAL 705  
 649 IGPVLPAL 657  
 611 IGPVLPAL 619  
 649 IGPVLPAL 657  
 649 IGPVLPAL 657  
 649 IGPVLPAL 657  
 424 IGPVLPAL 432  
 638 IGPVLPAL 646  
 611 IGPVLPAL 619  
 560 IGPVLPAL 568  
 645 IGPVLPAL 653  
 641 IGPVLPAL 649  
 646 IGPVLPAL 654  
 283 IGPVLPAL 291  
 650 IGRVLPAL 658  
 646 IGPVLPAL 654  
 427 IGPVLPAL 435  
 644 IGPVLPAL 652  
 494 IGPVLPAL 502  
 642 IGPVLPAL 650  
 667 IGPVLPAL 675  
 664 IGPVLPAL 672  
 647 IGPVLPAL 655  
 374 CRCLTEINSL 382  
 423 CRCLTEINSL 431  
 426 CRCLTEINSL 434  
 441 CRCLTEINSL 449  
 434 CRVOTLTAL 442  
 434 CRVOTLTAL 442  
 432 SRINLETSL 440  
 433 SRINLETSL 441  
 468 CRLOSINSL 476  
 433 CRLOTINSL 441  
 438 CRLOSINSL 446  
 438 CRLOSINSL 446  
 442 CRCLITSM 450  
 439 CRCLITSM 447  
 434 CRCLITSM 442  
 434 CRCLITSM 442  
 475 CRCLINSL 483  
 308 CRCLITSM 316  
 259 CRCLITSM 267  
 433 SRLTGLTLM 441  
 433 SRLTGLTLM 441  
 429 CRVSVVTTM 437  
 426 CRVSVVTTM 434  
 431 CRCLITSM 439  
 480 CRCLITSM 488  
 434 CRCLIVSM 442  
 434 CRCLIVSM 442  
 438 CRCLIMSM 446  
 438 CRCLIMSM 446  
 437 CRCLIMSM 445  
 448 CRCLIMSM 456  
 439 CRCLIMSM 447  
 443 CRCLIVSM 451  
 435 CRCLIMSM 443  
 435 CRCLIMSM 443  
 434 CRCLISM 442  
 433 CRCLISM 441  
 433 CRCLISM 441  
 405 CRCLIMSM 413  
 437 CRCLIVAM 445  
 312 CRCLIVSM 320  
 454 CRCLIMSM 462  
 433 CRCLIMSM 441  
 483 CRCLIMSM 491  
 308 CRCLIMSM 316  
 433 CRCLIMSM 441  
 438 CRCLIMSM 446  
 435 CRCLIMSM 443  
 435 CRCLIMSM 443  
 475 CRCLIMSM 483  
 433 CRCLIMSM 441  
 553 SVIICSLSV 561  
 467 CRCLIAI 475  
 455 CRCLIAI 463  
 629 CSLIIPSL 637  
 626 CRCLIVSI 634  
 631 CELCVLTA 639  
 632 CKLCVLTAV 640  
 357 AKVIFSVI 365  
 362 GNMIFLMSI 370  
 360 CDLCVLTSI 368  
 643 CDLCVLTSI 651  
 561 SKVYIMASSI 569  
 543 CKTCVMTSI 551  
 623 CKLCVLTSV 631  
 607 CKLCVLTSV 615

**Figure S22: An activity-determining region in an alignment of previously known (black), newly characterized (blue), and candidate (grey) TPS-e enzymes from Lamiaceae. Red stars indicate residues previously implicated in catalytic specificity. The combination of leucine and isoleucine has been implicated in contributing to *ent*-kaurene synthase activity. Positions are colored to indicate conservation within each subgroup.**
